# Supplementary material for: MEDIATOR18 and MEDIATOR20 confer susceptibility to Fusarium oxysporum in Arabidopsis thaliana
Source: PLoS One. 2017 Apr 25;12(4):e0176022. doi: 10.1371/journal.pone.0176022 (PMC5404846; doi:10.1371/journal.pone.0176022)
Supplement: S2 Table — (XLSX) [file pone.0176022.s004.xlsx]

## Sheet: WT_vs_med18
Differentially expressed gene list comparing WT with med18 RNAseq samples
test_id	gene_id	gene	locus	sample_1	sample_2	status	value_1	value_2	log2(fold_change)	test_stat	p_value	q_value	gene model	description
XLOC_000782	XLOC_000782	AT1G16410	Chr1:5608806-5611426	WT	18	OK	0.241464	8.16359	5.07933	5.3443	5e-05	0.000622834	AT1G16410.1	member of CYP79F
XLOC_019638	XLOC_019638	AT4G04223	Chr4:2036510-2037816	WT	18	OK	3.67108	117.067	4.99499	9.71443	5e-05	0.000622834	AT4G04223.1	Unknown gene
XLOC_013164	XLOC_013164	AT3G02480	Chr3:512311-513027	WT	18	OK	8.53705	219.915	4.68707	16.2394	5e-05	0.000622834	AT3G02480.1	Late embryogenesis abundant protein (LEA) family protein; BEST Arabidopsis thaliana protein match is: Late embryogenesis abundant protein (LEA) family protein (TAIR:AT5G38760.1); Has 213 Blast hits to 189 proteins in 38 species: Archae - 0; Bacteria - 0; Metazoa - 9; Fungi - 12; Plants - 190; Viruses - 0; Other Eukaryotes - 2 (source: NCBI BLink).
XLOC_026101	XLOC_026101	AT5G38910	Chr5:15578651-15579794	WT	18	OK	1.14386	27.8966	4.60811	7.00311	5e-05	0.000622834	AT5G38910.1	RmlC-like cupins superfamily protein; FUNCTIONS IN: manganese ion binding, nutrient reservoir activity; INVOLVED IN: biological_process unknown; LOCATED IN: endomembrane system, apoplast; CONTAINS InterPro DOMAIN/s: Cupin, RmlC-type (InterPro:IPR011051), Cupin 1 (InterPro:IPR006045), RmlC-like jelly roll fold (InterPro:IPR014710), Germin (InterPro:IPR001929), Germin, manganese binding site (Inter…
XLOC_019136	XLOC_019136	AT3G59890	Chr3:22121865-22126630	WT	18	OK	7.3773	174.121	4.56085	13.7906	5e-05	0.000622834	AT3G59890.1	Dihydrodipicolinate reductase, bacterial/plant; FUNCTIONS IN: dihydrodipicolinate reductase activity; INVOLVED IN: oxidation reduction, lysine biosynthetic process via diaminopimelate, diaminopimelate biosynthetic process, metabolic process; LOCATED IN: chloroplast, cytoplasm; CONTAINS InterPro DOMAIN/s: Dihydrodipicolinate reductase, C-terminal (InterPro:IPR022663), NAD(P)-binding domain (InterP…
XLOC_012060	XLOC_012060	AT2G29150	Chr2:12535714-12536964	WT	18	OK	0.508694	11.2061	4.46135	5.80753	0.00015	0.00165462	AT2G29150.1	NAD(P)-binding Rossmann-fold superfamily protein; FUNCTIONS IN: oxidoreductase activity, binding, catalytic activity; INVOLVED IN: oxidation reduction, metabolic process; CONTAINS InterPro DOMAIN/s: Short-chain dehydrogenase/reductase, conserved site (InterPro:IPR020904), NAD(P)-binding domain (InterPro:IPR016040), Glucose/ribitol dehydrogenase (InterPro:IPR002347), Short-chain dehydrogenase/redu…
XLOC_012878	XLOC_012878	AT2G43920	Chr2:18189007-18191348	WT	18	OK	6.47217	141.492	4.45032	12.5311	5e-05	0.000622834	AT2G43920.1	HARMLESS TO OZONE LAYER 2 (HOL2); FUNCTIONS IN: methyltransferase activity, thiopurine S-methyltransferase activity; INVOLVED IN: metabolic process; LOCATED IN: cytoplasm; CONTAINS InterPro DOMAIN/s: Thiopurine S-methyltransferase (InterPro:IPR008854); BEST Arabidopsis thaliana protein match is: HARMLESS TO OZONE LAYER 1 (TAIR:AT2G43910.1); Has 1105 Blast hits to 1103 proteins in 422 species: Arc…
XLOC_005614	XLOC_005614	AT1G32350	Chr1:11666976-11668690	WT	18	OK	1.2025	25.5722	4.41046	10.1531	5e-05	0.000622834	AT1G32350.1	alternative oxidase 1D (AOX1D); FUNCTIONS IN: alternative oxidase activity; INVOLVED IN: oxidation reduction, response to cyclopentenone; LOCATED IN: mitochondrial envelope, mitochondrion; EXPRESSED IN: stem, sepal, leaf, stamen; EXPRESSED DURING: LP.04 four leaves visible, 4 anthesis, petal differentiation and expansion stage; CONTAINS InterPro DOMAIN/s: Alternative oxidase (InterPro:IPR002680);…
XLOC_025369	XLOC_025369	AT5G26270	Chr5:9206374-9208136	WT	18	OK	0.360479	6.74417	4.22565	3.77928	0.00045	0.00422513	AT5G26270.1	unknown protein; Has 1807 Blast hits to 1807 proteins in 277 species: Archae - 0; Bacteria - 0; Metazoa - 736; Fungi - 347; Plants - 385; Viruses - 0; Other Eukaryotes - 339 (source: NCBI BLink).
XLOC_028123	XLOC_028123	AT5G10140	Chr5:3173496-3179448	WT	18	OK	3.69253	68.6922	4.21747	9.61994	5e-05	0.000622834	AT5G10140.1	MADS-box protein encoded by FLOWERING LOCUS C - transcription factor that functions as a repressor of floral transition and contributes to temperature compensation of the circadian clock. Expression is downregulated during cold treatment. Vernalization, FRI and the autonomous pathway all influence the state of FLC chromatin. Both maternal and paternal alleles are reset by vernalization, but their…
XLOC_008951	XLOC_008951	AT2G19960	Chr2:8621886-8622933	WT	18	OK	0.332054	4.0508	3.60872	1.69341	0.00285	0.0188984	AT2G19960.1	hAT family dimerisation domain; FUNCTIONS IN: protein dimerization activity; INVOLVED IN: biological_process unknown; LOCATED IN: cellular_component unknown; CONTAINS InterPro DOMAIN/s: HAT dimerisation (InterPro:IPR008906); BEST Arabidopsis thaliana protein match is: hAT family dimerisation domain (TAIR:AT2G06500.1); Has 483 Blast hits to 479 proteins in 38 species: Archae - 0; Bacteria - 0; Met…
XLOC_006025	XLOC_006025	AT1G43640	Chr1:16439434-16441844	WT	18	OK	0.223987	2.53782	3.5021	3.90072	0.0001	0.00115693	AT1G43640.1	Member of TLP family
XLOC_010666	XLOC_010666	AT2G04070	Chr2:1353754-1355790	WT	18	OK	1.87913	21.2028	3.49612	9.57337	5e-05	0.000622834	AT2G04070.1	MATE efflux family protein; FUNCTIONS IN: antiporter activity, drug transmembrane transporter activity, transporter activity; INVOLVED IN: transport, drug transmembrane transport, transmembrane transport; LOCATED IN: membrane; EXPRESSED IN: 10 plant structures; EXPRESSED DURING: 7 growth stages; CONTAINS InterPro DOMAIN/s: MATE family transporter related protein (InterPro:IPR015521), Multi antimi…
XLOC_006381	XLOC_006381	AT1G52050	Chr1:19354918-19356764	WT	18	OK	1.47664	16.3357	3.46764	7.64186	5e-05	0.000622834	AT1G52050.1	Mannose-binding lectin superfamily protein; FUNCTIONS IN: molecular_function unknown; INVOLVED IN: biological_process unknown; LOCATED IN: endomembrane system; EXPRESSED IN: 7 plant structures; EXPRESSED DURING: 4 anthesis, E expanded cotyledon stage; CONTAINS InterPro DOMAIN/s: Mannose-binding lectin (InterPro:IPR001229); BEST Arabidopsis thaliana protein match is: Mannose-binding lectin superfa…
XLOC_025406	XLOC_025406	AT5G26900	Chr5:9463517-9470403	WT	18	OK	0.725686	7.36398	3.34307	3.40197	0.0002	0.00212981	AT5G26900.1	No expression of gene detected yet.
XLOC_003307	XLOC_003307	AT1G67220	Chr1:25144946-25150643	WT	18	OK	0.123321	1.23821	3.32776	3.90659	5e-05	0.000622834	AT1G67220.1	histone acetyltransferase of the CBP family 2 (HAC2); FUNCTIONS IN: histone acetyltransferase activity, transcription cofactor activity, DNA binding; INVOLVED IN: regulation of transcription, DNA-dependent; LOCATED IN: nucleus; EXPRESSED IN: shoot apical meristem, root, flower, leaf; CONTAINS InterPro DOMAIN/s: Histone H3-K56 acetyltransferase, RTT109 (InterPro:IPR013178), Zinc finger, TAZ-type (…
XLOC_023969	XLOC_023969	AT4G36700	Chr4:17298199-17300367	WT	18	OK	0.234524	2.34684	3.32291	3.95871	5e-05	0.000622834	AT4G36700.1	RmlC-like cupins superfamily protein; FUNCTIONS IN: nutrient reservoir activity; INVOLVED IN: biological_process unknown; LOCATED IN: endomembrane system; EXPRESSED IN: seed; EXPRESSED DURING: seedling growth; CONTAINS InterPro DOMAIN/s: Cupin, RmlC-type (InterPro:IPR011051), Cupin 1 (InterPro:IPR006045), RmlC-like jelly roll fold (InterPro:IPR014710); BEST Arabidopsis thaliana protein match is: …
XLOC_030537	XLOC_030537	AT5G55150	Chr5:22382274-22383392	WT	18	OK	2.10755	19.8021	3.23202	8.2149	5e-05	0.000622834	AT5G55150.1	Protein of unknown function (DUF295); CONTAINS InterPro DOMAIN/s: Protein of unknown function DUF295 (InterPro:IPR005174); BEST Arabidopsis thaliana protein match is: F-box family protein with a domain of unknown function (DUF295) (TAIR:AT2G26160.1); Has 30201 Blast hits to 17322 proteins in 780 species: Archae - 12; Bacteria - 1396; Metazoa - 17338; Fungi - 3422; Plants - 5037; Viruses - 0; Othe…
XLOC_017797	XLOC_017797	AT3G30120	Chr3:11751813-11757120	WT	18	OK	0.413169	3.7922	3.19823	6.01022	5e-05	0.000622834	AT3G30120.1	pseudogene, similar to CTV.22, blastp match of 29% identity and 4.9e-74 P-value to GP|24461867|gb|AAN62354.1|AF506028_23|AF506028 CTV.22 {Poncirus trifoliata}
XLOC_029901	XLOC_029901	AT5G43450	Chr5:17457124-17458797	WT	18	OK	1.74104	15.2176	3.12772	7.89829	5e-05	0.000622834	AT5G43450.1	encodes a protein whose sequence is similar to ACC oxidase
XLOC_027984	XLOC_027984	AT5G07060	Chr5:2193965-2195963	WT	18	OK	1.47233	12.7288	3.11192	5.66396	5e-05	0.000622834	AT5G07060.1	Encodes MAC5C, homologous to MAC5A. MAC5A is a component of the MOS4-associated complex (MAC) that contributes to snc1- mediated autoimmunity. Homologues include AT1G07360 (MAC5A), AT2G29580 (MAC5B) and AT5G07060 (MAC5C). MAC5A and MAC5B are more closely related to each other than to MAC5C.
XLOC_021335	XLOC_021335	AT4G31970	Chr4:15462407-15464358	WT	18	OK	0.502299	4.29642	3.09652	5.15176	5e-05	0.000622834	AT4G31970.1	member of CYP82C
XLOC_002686	XLOC_002686	AT1G55230	Chr1:20602818-20603924	WT	18	OK	0.842005	7.01262	3.05805	5.70642	5e-05	0.000622834	AT1G55230.1	Family of unknown function (DUF716) ; INVOLVED IN: biological_process unknown; LOCATED IN: endomembrane system; CONTAINS InterPro DOMAIN/s: Protein of unknown function DUF716 (InterPro:IPR006904); BEST Arabidopsis thaliana protein match is: Family of unknown function (DUF716) (TAIR:AT1G55240.1); Has 423 Blast hits to 422 proteins in 52 species: Archae - 0; Bacteria - 0; Metazoa - 178; Fungi - 0; …
XLOC_003090	XLOC_003090	AT1G63210	Chr1:23443069-23447903	WT	18	OK	0.226954	1.88964	3.05764	4.35619	5e-05	0.000622834	AT1G63210.1	SPT6L encodes a putative WG/GW-repeat protein involved in the regulation of apical?basal polarity of embryo
XLOC_002403	XLOC_002403	AT1G50130	Chr1:18566439-18569712	WT	18	OK	0.20421	1.68927	3.04827	3.85033	5e-05	0.000622834	AT1G50130.1	pseudogene, putative leucyl tRNA synthetase, similar to leucyl tRNA synthetase GB:BAA95667 GI:7804450 from (Homo sapiens); blastp match of 51% identity and 2.5e-213 P-value to GP|26340206|dbj|BAC33766.1||AK049472 unnamed protein product {Mus musculus}
XLOC_030230	XLOC_030230	AT5G49200	Chr5:19947795-19949055	WT	18	OK	0.598281	4.84679	3.01813	5.11446	5e-05	0.000622834	AT5G49200.1	WD-40 repeat family protein / zfwd4 protein (ZFWD4); FUNCTIONS IN: zinc ion binding, nucleic acid binding; INVOLVED IN: biological_process unknown; CONTAINS InterPro DOMAIN/s: WD40 repeat 2 (InterPro:IPR019782), Zinc finger, CCCH-type (InterPro:IPR000571), WD40 repeat, conserved site (InterPro:IPR019775), WD40 repeat (InterPro:IPR001680), G-protein beta WD-40 repeat, region (InterPro:IPR020472), …
XLOC_007014	XLOC_007014	AT1G64480	Chr1:23947694-23950362	WT	18	OK	0.51398	4.05288	2.97917	2.48725	5e-05	0.000622834	AT1G64480.1	calcineurin B-like protein 8, member of plant-specific family of calcium sensor proteins containing 3 EF-hand motifs
XLOC_017293	XLOC_017293	AT3G22100	Chr3:7783710-7784469	WT	18	OK	0.370947	2.92342	2.97837	2.98568	0.0009	0.00748109	AT3G22100.1	basic helix-loop-helix (bHLH) DNA-binding superfamily protein; FUNCTIONS IN: DNA binding, sequence-specific DNA binding transcription factor activity; INVOLVED IN: regulation of transcription; LOCATED IN: nucleus; CONTAINS InterPro DOMAIN/s: Helix-loop-helix DNA-binding domain (InterPro:IPR001092), Helix-loop-helix DNA-binding (InterPro:IPR011598); Has 284 Blast hits to 284 proteins in 18 species…
XLOC_023088	XLOC_023088	AT4G19750	Chr4:10745284-10747162	WT	18	OK	0.20353	1.60151	2.97612	1.98343	0.00075	0.00645449	AT4G19750.1	Glycosyl hydrolase family protein with chitinase insertion domain; FUNCTIONS IN: cation binding, hydrolase activity, hydrolyzing O-glycosyl compounds, chitinase activity, catalytic activity; INVOLVED IN: carbohydrate metabolic process; LOCATED IN: cellular_component unknown; CONTAINS InterPro DOMAIN/s: Glycoside hydrolase, family 18, catalytic domain (InterPro:IPR001223), Chitinase II (InterPro:I…
XLOC_021425	XLOC_021425	AT4G33710	Chr4:16181011-16181776	WT	18	OK	0.626074	4.90958	2.9712	3.88587	0.00145	0.0110189	AT4G33710.1	CAP (Cysteine-rich secretory proteins, Antigen 5, and Pathogenesis-related 1 protein) superfamily protein; FUNCTIONS IN: molecular_function unknown; INVOLVED IN: biological_process unknown; LOCATED IN: endomembrane system, extracellular region; CONTAINS InterPro DOMAIN/s: Allergen V5/Tpx-1 related, conserved site (InterPro:IPR018244), Allergen V5/Tpx-1 related (InterPro:IPR001283), SCP-like extra…
XLOC_028916	XLOC_028916	AT5G25840	Chr5:9010723-9011498	WT	18	OK	1.27465	9.95251	2.96496	5.50444	5e-05	0.000622834	AT5G25840.1	Protein of unknown function (DUF1677); CONTAINS InterPro DOMAIN/s: Protein of unknown function DUF1677, plant (InterPro:IPR012876); BEST Arabidopsis thaliana protein match is: Protein of unknown function (DUF1677) (TAIR:AT1G79770.1); Has 1807 Blast hits to 1807 proteins in 277 species: Archae - 0; Bacteria - 0; Metazoa - 736; Fungi - 347; Plants - 385; Viruses - 0; Other Eukaryotes - 339 (source:…
XLOC_008128	XLOC_008128	AT2G05350	Chr2:1949565-1954740	WT	18	OK	0.513521	4.00162	2.96209	2.02233	5e-05	0.000622834	AT2G05350.1	unknown protein; Has 22 Blast hits to 16 proteins in 5 species: Archae - 0; Bacteria - 0; Metazoa - 0; Fungi - 0; Plants - 22; Viruses - 0; Other Eukaryotes - 0 (source: NCBI BLink).
XLOC_028825	XLOC_028825	AT5G24240,AT5G24250	Chr5:8228813-8234652	WT	18	OK	1.64487	12.6489	2.94297	4.61935	5e-05	0.000622834	AT5G24240.1	Phosphatidylinositol 3- and 4-kinase ;Ubiquitin family protein; FUNCTIONS IN: inositol or phosphatidylinositol kinase activity, phosphotransferase activity, alcohol group as acceptor; LOCATED IN: peroxisome; EXPRESSED IN: 11 plant structures; EXPRESSED DURING: 6 growth stages; CONTAINS InterPro DOMAIN/s: Phosphatidylinositol 3-/4-kinase, catalytic (InterPro:IPR000403), Ubiquitin (InterPro:IPR0006…
XLOC_010093	XLOC_010093	AT2G40740	Chr2:16997176-16999277	WT	18	OK	0.514561	3.81104	2.88877	2.68861	0.0002	0.00212981	AT2G40740.1	member of WRKY Transcription Factor; Group III
XLOC_010662	XLOC_010662	AT2G04050	Chr2:1337193-1339496	WT	18	OK	6.76123	48.6895	2.84825	8.83937	5e-05	0.000622834	AT2G04050.1	MATE efflux family protein; FUNCTIONS IN: antiporter activity, drug transmembrane transporter activity, transporter activity; INVOLVED IN: drug transmembrane transport, transmembrane transport; LOCATED IN: membrane; EXPRESSED IN: stem, leaf whorl, stamen; EXPRESSED DURING: 4 anthesis, petal differentiation and expansion stage; CONTAINS InterPro DOMAIN/s: MATE family transporter related protein (I…
XLOC_007254	XLOC_007254	AT1G68765	Chr1:25829951-25830487	WT	18	OK	2.31527	15.529	2.74571	6.67717	5e-05	0.000622834	AT1G68765.1	Encodes a small protein of 77 amino acids. Loss of function mutations are defective in the process of ethylene independent floral organ abscission. Although the mutants have a normal appearing abscission zone, the floral organs do not abscisce. The peptide appears to be secreted and may function as a ligand. Arabidopsis 35S:IDA lines constitutively overexpressing IDA exhibit earlier abscission of…
XLOC_025373	XLOC_025373	AT5G26300	Chr5:9229325-9231033	WT	18	OK	2.13512	14.2019	2.7337	6.53908	5e-05	0.000622834	AT5G26300.1	TRAF-like family protein; CONTAINS InterPro DOMAIN/s: TRAF-like (InterPro:IPR008974), MATH (InterPro:IPR002083); BEST Arabidopsis thaliana protein match is: TRAF-like family protein (TAIR:AT5G26280.1); Has 1807 Blast hits to 1807 proteins in 277 species: Archae - 0; Bacteria - 0; Metazoa - 736; Fungi - 347; Plants - 385; Viruses - 0; Other Eukaryotes - 339 (source: NCBI BLink).
XLOC_026884	XLOC_026884	AT5G52700	Chr5:21372470-21374890	WT	18	OK	1.66526	10.853	2.70428	5.76924	5e-05	0.000622834	AT5G52700.1	Copper transport protein family; BEST Arabidopsis thaliana protein match is: Copper transport protein family (TAIR:AT5G52680.1); Has 1807 Blast hits to 1807 proteins in 277 species: Archae - 0; Bacteria - 0; Metazoa - 736; Fungi - 347; Plants - 385; Viruses - 0; Other Eukaryotes - 339 (source: NCBI BLink).
XLOC_005303	XLOC_005303	AT1G26410	Chr1:9138674-9140439	WT	18	OK	1.07963	6.94619	2.68569	5.98949	5e-05	0.000622834	AT1G26410.1	FAD-binding Berberine family protein; FUNCTIONS IN: electron carrier activity, oxidoreductase activity, FAD binding, catalytic activity; LOCATED IN: cellular_component unknown; CONTAINS InterPro DOMAIN/s: FAD-binding, type 2 (InterPro:IPR016166), Berberine/berberine-like (InterPro:IPR012951), FAD linked oxidase, N-terminal (InterPro:IPR006094); BEST Arabidopsis thaliana protein match is: FAD-bind…
XLOC_025479	XLOC_025479	AT5G27940	Chr5:9974410-9975071	WT	18	OK	0.686284	4.40663	2.6828	3.67318	0.001	0.00815767	AT5G27940.1	WPP domain protein 3 (WPP3); BEST Arabidopsis thaliana protein match is: WPP domain protein 2 (TAIR:AT1G47200.1); Has 30201 Blast hits to 17322 proteins in 780 species: Archae - 12; Bacteria - 1396; Metazoa - 17338; Fungi - 3422; Plants - 5037; Viruses - 0; Other Eukaryotes - 2996 (source: NCBI BLink).
XLOC_022016	XLOC_022016	AT4G04221	Chr4:2033236-2036388	WT	18	OK	1.36842	8.78049	2.68179	2.37993	0.002	0.0143176	AT4G04221.1	Potential natural antisense gene, locus overlaps with AT4G04220
XLOC_029671	XLOC_029671	AT5G39493	Chr5:15810041-15814312	WT	18	OK	0.411193	2.62196	2.67276	1.75037	0.00215	0.0151441	AT5G39493.1	Plant self-incompatibility protein S1 family; LOCATED IN: endomembrane system; CONTAINS InterPro DOMAIN/s: Plant self-incompatibility S1 (InterPro:IPR010264); BEST Arabidopsis thaliana protein match is: Plant self-incompatibility protein S1 family (TAIR:AT1G09245.1); Has 30201 Blast hits to 17322 proteins in 780 species: Archae - 12; Bacteria - 1396; Metazoa - 17338; Fungi - 3422; Plants - 5037; …
XLOC_020015	XLOC_020015	AT4G08620	Chr4:5500312-5506265	WT	18	OK	0.424826	2.69288	2.66421	4.45349	5e-05	0.000622834	AT4G08620.1	Encodes a sulfate transporter. Contains STAS domain. Expressed in roots and guard cells. Up-regulated by sulfur deficiency.
XLOC_005521	XLOC_005521	AT1G30920	Chr1:11004241-11005444	WT	18	OK	0.755977	4.77614	2.65943	4.74731	5e-05	0.000622834	AT1G30920.1	F-box family protein; CONTAINS InterPro DOMAIN/s: F-box domain, cyclin-like (InterPro:IPR001810), F-box domain, Skp2-like (InterPro:IPR022364), F-box associated domain, type 3 (InterPro:IPR013187), F-box associated interaction domain (InterPro:IPR017451); BEST Arabidopsis thaliana protein match is: F-box and associated interaction domains-containing protein (TAIR:AT5G42430.1); Has 1576 Blast hits…
XLOC_012146	XLOC_012146	AT2G30670	Chr2:13069312-13070904	WT	18	OK	8.70457	54.6426	2.65018	9.14317	5e-05	0.000622834	AT2G30670.1	NAD(P)-binding Rossmann-fold superfamily protein; FUNCTIONS IN: oxidoreductase activity, binding, catalytic activity; INVOLVED IN: oxidation reduction, metabolic process; LOCATED IN: cellular_component unknown; EXPRESSED IN: 18 plant structures; EXPRESSED DURING: 12 growth stages; CONTAINS InterPro DOMAIN/s: NAD(P)-binding domain (InterPro:IPR016040), Glucose/ribitol dehydrogenase (InterPro:IPR00…
XLOC_003519	XLOC_003519	AT1G71140	Chr1:26824676-26826748	WT	18	OK	2.00091	12.5397	2.64777	7.14979	5e-05	0.000622834	AT1G71140.1	MATE efflux family protein; FUNCTIONS IN: antiporter activity, drug transmembrane transporter activity, transporter activity; INVOLVED IN: drug transmembrane transport, transmembrane transport; LOCATED IN: plasma membrane, membrane; EXPRESSED IN: 13 plant structures; EXPRESSED DURING: 8 growth stages; CONTAINS InterPro DOMAIN/s: MATE family transporter related protein (InterPro:IPR015521), Multi …
XLOC_008433	XLOC_008433	AT2G11280	Chr2:4486265-4487690	WT	18	OK	0.193639	1.20737	2.64042	1.93043	0.00375	0.0235993	AT2G11280.1	pseudogene, hypothetical protein
XLOC_010576	XLOC_010576	AT2G02240	Chr2:592358-593602	WT	18	OK	0.579925	3.61318	2.63933	3.90056	0.00015	0.00165462	AT2G02240.1	maternal effect embryo arrest 66 (MEE66); CONTAINS InterPro DOMAIN/s: F-box domain, cyclin-like (InterPro:IPR001810), F-box domain, Skp2-like (InterPro:IPR022364); BEST Arabidopsis thaliana protein match is: phloem protein 2-B2 (TAIR:AT2G02250.1); Has 35333 Blast hits to 34131 proteins in 2444 species: Archae - 798; Bacteria - 22429; Metazoa - 974; Fungi - 991; Plants - 531; Viruses - 0; Other Eu…
XLOC_010934	XLOC_010934	AT2G07732	Chr2:3468167-3468774	WT	18	OK	0.509635	3.1409	2.62364	2.77632	0.0049	0.0292317	AT2G07732.1	Ribulose bisphosphate carboxylase large chain, catalytic domain; FUNCTIONS IN: ribulose-bisphosphate carboxylase activity, magnesium ion binding; INVOLVED IN: carbon fixation; LOCATED IN: plastid; CONTAINS InterPro DOMAIN/s: Ribulose bisphosphate carboxylase, large subunit, C-terminal (InterPro:IPR000685); BEST Arabidopsis thaliana protein match is: Ribulose bisphosphate carboxylase large chain, …
XLOC_011911	XLOC_011911	AT2G26550,AT2G26560	Chr2:11291133-11295911	WT	18	OK	13.8621	84.4001	2.6061	8.46253	5e-05	0.000622834	AT2G26550.1	Encodes a heme oxygenase-like protein lacking the conserved histidine residue at the active site that is usually involved in heme-iron coordination. It is unable to bind and degrade heme. Mutant analyses suggest a role in photomorphogenesis. The protein can bind the heme precursor, proto IX, which could be biologically significant and point to a role in the regulation of the two tetrapyrrole bios…
XLOC_022558	XLOC_022558	AT4G11340	Chr4:6891923-6899130	WT	18	OK	0.485221	2.93918	2.5987	2.69999	0.00045	0.00422513	AT4G11340.1	Disease resistance protein (TIR-NBS-LRR class) family; FUNCTIONS IN: transmembrane receptor activity; INVOLVED IN: signal transduction, defense response, innate immune response; LOCATED IN: intrinsic to membrane; EXPRESSED IN: stem; CONTAINS InterPro DOMAIN/s: Toll-Interleukin receptor (InterPro:IPR000157); BEST Arabidopsis thaliana protein match is: Disease resistance protein (TIR-NBS-LRR class)…
XLOC_025183	XLOC_025183	AT5G22555	Chr5:7489421-7490503	WT	18	OK	5.10668	30.6957	2.58758	7.61312	5e-05	0.000622834	AT5G22555.1	unknown protein; Has 30201 Blast hits to 17322 proteins in 780 species: Archae - 12; Bacteria - 1396; Metazoa - 17338; Fungi - 3422; Plants - 5037; Viruses - 0; Other Eukaryotes - 2996 (source: NCBI BLink).
XLOC_029442	XLOC_029442	AT5G35935.1	Chr5:14083387-14089891	WT	18	OK	0.770962	4.51991	2.55156	7.36232	5e-05	0.000622834	AT5G35935.1	transposable element gene; copia-like retrotransposon family, has a 2.0e-232 P-value blast match to GB:CAA72989 open reading frame 1 (Ty1_Copia-element) (Brassica oleracea)
XLOC_017349	XLOC_017349	AT3G23120	Chr3:8227006-8229611	WT	18	OK	1.14109	6.60144	2.53237	5.8287	5e-05	0.000622834	AT3G23120.1	receptor like protein 38 (RLP38); FUNCTIONS IN: kinase activity; INVOLVED IN: signal transduction, defense response; LOCATED IN: endomembrane system; CONTAINS InterPro DOMAIN/s: Leucine-rich repeat-containing N-terminal domain, type 2 (InterPro:IPR013210), Leucine-rich repeat (InterPro:IPR001611); BEST Arabidopsis thaliana protein match is: receptor like protein 37 (TAIR:AT3G23110.1); Has 120242 …
XLOC_028770	XLOC_028770	AT5G23220	Chr5:7819815-7820676	WT	18	OK	2.94516	16.6734	2.50113	6.56535	5e-05	0.000622834	AT5G23220.1	nicotinamidase 3 (NIC3); FUNCTIONS IN: nicotinamidase activity, catalytic activity; INVOLVED IN: metabolic process; EXPRESSED IN: root; CONTAINS InterPro DOMAIN/s: Isochorismatase-like (InterPro:IPR000868); BEST Arabidopsis thaliana protein match is: nicotinamidase 2 (TAIR:AT5G23230.1); Has 1807 Blast hits to 1807 proteins in 277 species: Archae - 0; Bacteria - 0; Metazoa - 736; Fungi - 347; Plan…
XLOC_020031	XLOC_020031	AT4G08867	Chr4:5658141-5660903	WT	18	OK	0.341387	1.9209	2.4923	2.29933	0.0019	0.0137362	AT4G08867.1	unknown protein; Has 35333 Blast hits to 34131 proteins in 2444 species: Archae - 798; Bacteria - 22429; Metazoa - 974; Fungi - 991; Plants - 531; Viruses - 0; Other Eukaryotes - 9610 (source: NCBI BLink).
XLOC_016316	XLOC_016316	AT3G03930	Chr3:1011413-1012810	WT	18	OK	0.49512	2.76852	2.48327	2.91151	0.0048	0.0287721	AT3G03930.1	protein kinase-related; BEST Arabidopsis thaliana protein match is: Protein kinase family protein (TAIR:AT3G03940.1); Has 314 Blast hits to 298 proteins in 30 species: Archae - 0; Bacteria - 18; Metazoa - 0; Fungi - 0; Plants - 292; Viruses - 0; Other Eukaryotes - 4 (source: NCBI BLink).
XLOC_006264	XLOC_006264	AT1G49900	Chr1:18473907-18477643	WT	18	OK	0.4862	2.6576	2.4505	4.63948	5e-05	0.000622834	AT1G49900.1	C2H2 type zinc finger transcription factor family; FUNCTIONS IN: sequence-specific DNA binding transcription factor activity, zinc ion binding, nucleic acid binding; LOCATED IN: intracellular; CONTAINS InterPro DOMAIN/s: Zinc finger, C2H2-like (InterPro:IPR015880), Zinc finger, C2H2-type (InterPro:IPR007087); BEST Arabidopsis thaliana protein match is: zinc-finger protein 2 (TAIR:AT3G19580.2); Ha…
XLOC_004081	XLOC_004081	AT1G02770	Chr1:604872-606693	WT	18	OK	1.01785	5.56116	2.44987	4.83329	5e-05	0.000622834	AT1G02770.1	Protein of unknown function (DUF626); CONTAINS InterPro DOMAIN/s: Protein of unknown function DUF626, Arabidopsis thaliana (InterPro:IPR006462); BEST Arabidopsis thaliana protein match is: Protein of unknown function (DUF626) (TAIR:AT1G19060.1); Has 209 Blast hits to 208 proteins in 2 species: Archae - 0; Bacteria - 0; Metazoa - 0; Fungi - 0; Plants - 209; Viruses - 0; Other Eukaryotes - 0 (sourc…
XLOC_004240	XLOC_004240	AT1G05490	Chr1:1618601-1623452	WT	18	OK	0.57161	3.11749	2.44728	5.41443	5e-05	0.000622834	AT1G05490.1	chromatin remodeling 31 (chr31); FUNCTIONS IN: helicase activity, DNA binding, ATP binding, nucleic acid binding; INVOLVED IN: biological_process unknown; EXPRESSED IN: 13 plant structures; EXPRESSED DURING: 6 growth stages; CONTAINS InterPro DOMAIN/s: DEAD-like helicase, N-terminal (InterPro:IPR014001), DNA/RNA helicase, C-terminal (InterPro:IPR001650), Helicase, superfamily 1/2, ATP-binding dom…
XLOC_010941	XLOC_010941	AT2G07737.1	Chr2:3481084-3482066	WT	18	OK	0.536556	2.85482	2.4116	3.36373	0.00055	0.00498267	AT2G07737.1	transposable element gene; pseudogene, similar to putative reverse transcriptase, blastp match of 43% identity and 2.8e-43 P-value to GP|13786450|gb|AAK39575.1|AC025296_10|AC025296 putative reverse transcriptase {Oryza sativa}
XLOC_022751	XLOC_022751	AT4G14165	Chr4:8174597-8175715	WT	18	OK	0.556033	2.9569	2.41084	2.88394	0.00585	0.0334757	AT4G14165.1	F-box family protein-related; BEST Arabidopsis thaliana protein match is: F-box family protein with a domain of unknown function (DUF295) (TAIR:AT4G22170.1); Has 30201 Blast hits to 17322 proteins in 780 species: Archae - 12; Bacteria - 1396; Metazoa - 17338; Fungi - 3422; Plants - 5037; Viruses - 0; Other Eukaryotes - 2996 (source: NCBI BLink).
XLOC_019728	XLOC_019728	AT4G05370,AT4G05380	Chr4:2735882-2740667	WT	18	OK	6.16492	32.6943	2.40688	2.08151	0.0077	0.0414011	AT4G05370.1	BCS1 AAA-type ATPase; FUNCTIONS IN: molecular_function unknown; INVOLVED IN: biological_process unknown; LOCATED IN: endomembrane system; EXPRESSED IN: stamen; EXPRESSED DURING: 4 anthesis, petal differentiation and expansion stage; BEST Arabidopsis thaliana protein match is: P-loop containing nucleoside triphosphate hydrolases superfamily protein (TAIR:AT1G43910.1); Has 118 Blast hits to 116 pro…
XLOC_020196	XLOC_020196	AT4G11210	Chr4:6832690-6833245	WT	18	OK	1.25051	6.61939	2.40418	4.36321	0.0004	0.00385261	AT4G11210.1	Disease resistance-responsive (dirigent-like protein) family protein; FUNCTIONS IN: molecular_function unknown; INVOLVED IN: lignan biosynthetic process, defense response; LOCATED IN: endomembrane system; EXPRESSED IN: leaf lamina base, petal, hypocotyl, cauline leaf, root; EXPRESSED DURING: 4 anthesis; CONTAINS InterPro DOMAIN/s: Plant disease resistance response protein (InterPro:IPR004265); BE…
XLOC_010661	XLOC_010661	AT2G04040	Chr2:1333261-1336489	WT	18	OK	7.31365	38.6132	2.40043	7.80212	5e-05	0.000622834	AT2G04040.1	AtDTX1 (At2g04040) has been identified as a detoxifying efflux carrier for plant-derived antibiotics and other toxic compounds, including CD2+. Mistakenly referred to as At2g04070 in PMID:11739388.
XLOC_031136	XLOC_031136	AT5G66970	Chr5:26739657-26741226	WT	18	OK	0.980927	5.13306	2.3876	2.56882	5e-05	0.000622834	AT5G66970.1	P-loop containing nucleoside triphosphate hydrolases superfamily protein; FUNCTIONS IN: GTP binding; INVOLVED IN: SRP-dependent cotranslational protein targeting to membrane; LOCATED IN: signal recognition particle, endoplasmic reticulum targeting; EXPRESSED IN: sperm cell; CONTAINS InterPro DOMAIN/s: Signal recognition particle, SRP54 subunit, GTPase (InterPro:IPR000897); BEST Arabidopsis thalia…
XLOC_029640	XLOC_029640	AT5G39120	Chr5:15662704-15663486	WT	18	OK	22.5326	116.494	2.37018	10.1408	5e-05	0.000622834	AT5G39120.1	RmlC-like cupins superfamily protein; FUNCTIONS IN: manganese ion binding, nutrient reservoir activity; INVOLVED IN: biological_process unknown; LOCATED IN: endomembrane system, apoplast; CONTAINS InterPro DOMAIN/s: Cupin, RmlC-type (InterPro:IPR011051), Cupin 1 (InterPro:IPR006045), RmlC-like jelly roll fold (InterPro:IPR014710), Germin (InterPro:IPR001929), Germin, manganese binding site (Inter…
XLOC_026951	XLOC_026951	AT5G53700	Chr5:21801142-21802787	WT	18	OK	0.553349	2.85638	2.36793	2.29459	5e-05	0.000622834	AT5G53700.1	RNA-binding (RRM/RBD/RNP motifs) family protein; BEST Arabidopsis thaliana protein match is: RNA-binding (RRM/RBD/RNP motifs) family protein (TAIR:AT5G03480.1); Has 156 Blast hits to 116 proteins in 15 species: Archae - 0; Bacteria - 0; Metazoa - 0; Fungi - 0; Plants - 150; Viruses - 0; Other Eukaryotes - 6 (source: NCBI BLink).
XLOC_011449	XLOC_011449	AT2G18180,AT2G18190	Chr2:7910773-7916111	WT	18	OK	0.619147	3.17395	2.35793	3.52484	5e-05	0.000622834	AT2G18180.1	Sec14p-like phosphatidylinositol transfer family protein; CONTAINS InterPro DOMAIN/s: Cellular retinaldehyde-binding/triple function, C-terminal (InterPro:IPR001251), Cellular retinaldehyde-binding/triple function, N-terminal (InterPro:IPR008273), Phosphatidylinositol transfer protein-like, N-terminal (InterPro:IPR011074); BEST Arabidopsis thaliana protein match is: SEC14-like 12 (TAIR:AT4G36490.…
XLOC_000300	XLOC_000300	AT1G07180	Chr1:2204319-2206934	WT	18	OK	0.56806	2.8949	2.3494	3.9881	5e-05	0.000622834	AT1G07180.1	Internal NAD(P)H dehydrogenase in mitochondria. The predicted protein sequence has high homology with other designated NAD(P)H DHs from microorganisms; the capacity for matrix NAD(P)H oxidation via the rotenone-insensitive pathway is significantly reduced in the Atndi1 mutant plant line; the in vitro translation product of AtNDI1 is imported into isolated mitochondria and located on the inside of…
XLOC_020238	XLOC_020238	AT4G11890	Chr4:7147864-7149921	WT	18	OK	2.22843	11.3402	2.34735	4.96653	5e-05	0.000622834	AT4G11890.3	Encodes a receptor-like cytosolic kinase ARCK1. Negatively controls abscisic acid and osmotic stress signal transduction.
XLOC_012713	XLOC_012713	AT2G40910	Chr2:17069867-17071657	WT	18	OK	0.87879	4.40746	2.32636	3.99599	5e-05	0.000622834	AT2G40910.1	F-box and associated interaction domains-containing protein; CONTAINS InterPro DOMAIN/s: F-box domain, cyclin-like (InterPro:IPR001810), F-box domain, Skp2-like (InterPro:IPR022364), F-box associated domain, type 3 (InterPro:IPR013187), F-box associated interaction domain (InterPro:IPR017451); BEST Arabidopsis thaliana protein match is: F-box and associated interaction domains-containing protein …
XLOC_025317	XLOC_025317	AT5G25230	Chr5:8739544-8743777	WT	18	OK	0.27618	1.37422	2.31493	3.05945	5e-05	0.000622834	AT5G25230.1	Ribosomal protein S5/Elongation factor G/III/V family protein; FUNCTIONS IN: translation factor activity, nucleic acid binding, GTP binding, translation elongation factor activity, GTPase activity; LOCATED IN: nucleolus; EXPRESSED IN: cultured cell; CONTAINS InterPro DOMAIN/s: Protein synthesis factor, GTP-binding (InterPro:IPR000795), Translation elongation factor EFG/EF2, domain IV (InterPro:IP…
XLOC_005301	XLOC_005301	AT1G26390	Chr1:9130016-9131779	WT	18	OK	0.243931	1.21279	2.31378	2.65352	0.00155	0.0116177	AT1G26390.1	FAD-binding Berberine family protein; FUNCTIONS IN: electron carrier activity, oxidoreductase activity, FAD binding, catalytic activity; LOCATED IN: endomembrane system; EXPRESSED IN: 10 plant structures; EXPRESSED DURING: LP.06 six leaves visible, LP.04 four leaves visible, 4 anthesis, LP.02 two leaves visible, petal differentiation and expansion stage; CONTAINS InterPro DOMAIN/s: FAD-binding, t…
XLOC_000448	XLOC_000448	AT1G10220	Chr1:3351996-3354856	WT	18	OK	0.881	4.35448	2.30529	2.9171	5e-05	0.000622834	AT1G10220.1	BEST Arabidopsis thaliana protein match is: ZCF37 (TAIR:AT1G59590.1); Has 43 Blast hits to 43 proteins in 15 species: Archae - 0; Bacteria - 2; Metazoa - 7; Fungi - 0; Plants - 27; Viruses - 0; Other Eukaryotes - 7 (source: NCBI BLink).
XLOC_004254	XLOC_004254	AT1G05680	Chr1:1703091-1704691	WT	18	OK	4.01935	19.5145	2.27952	6.95874	5e-05	0.000622834	AT1G05680.1	Encodes a UDP-glucosyltransferase, UGT74E2, that acts on IBA (indole-3-butyric acid) and affects auxin homeostasis. The transcript and protein levels of this enzyme are strongly induced by H2O2 and may allow integration of ROS (reactive oxygen species) and auxin signaling. This enzyme can also transfer glycosyl groups to several compounds related to the explosive TNT when this synthetic compound …
XLOC_012209	XLOC_012209	AT2G31860	Chr2:13542482-13545363	WT	18	OK	0.49227	2.37079	2.26785	3.75934	5e-05	0.000622834	AT2G31860.1	pseudogene, poly (ADP-ribose) glycohydrolase, putative, contains Pfam domain, PF05028: poly (ADP-ribose) glycohydrolase (PARG); blastp match of 59% identity and 1.4e-19 P-value to EGAD|134505|143482 114E2.c protein {Drosophila melanogaster}
XLOC_018376	XLOC_018376	AT3G46070	Chr3:16920444-16920957	WT	18	OK	1.70463	8.20715	2.26742	4.38357	0.00025	0.00258687	AT3G46070.1	C2H2-type zinc finger family protein; FUNCTIONS IN: sequence-specific DNA binding transcription factor activity, zinc ion binding, nucleic acid binding; INVOLVED IN: regulation of transcription; LOCATED IN: intracellular; EXPRESSED IN: root, flower; EXPRESSED DURING: petal differentiation and expansion stage; CONTAINS InterPro DOMAIN/s: Zinc finger, C2H2-like (InterPro:IPR015880), Zinc finger, C2…
XLOC_018848	XLOC_018848	AT3G54530	Chr3:20185965-20187637	WT	18	OK	0.904219	4.34236	2.26373	3.437	5e-05	0.000622834	AT3G54530.1	unknown protein; BEST Arabidopsis thaliana protein match is: unknown protein (TAIR:AT3G54520.1); Has 159 Blast hits to 159 proteins in 50 species: Archae - 2; Bacteria - 26; Metazoa - 55; Fungi - 5; Plants - 20; Viruses - 2; Other Eukaryotes - 49 (source: NCBI BLink).
XLOC_008296	XLOC_008296	AT2G07683.1	Chr2:3301882-3303428	WT	18	OK	0.521005	2.49143	2.2576	3.35734	5e-05	0.000622834	AT2G07683.1	transposable element gene; copia-like retrotransposon family, has a 2.2e-110 P-value blast match to GB:AAA57005 Hopscotch polyprotein (Ty1_Copia-element) (Zea mays)
XLOC_020384	XLOC_020384	AT4G14548	Chr4:8346878-8350252	WT	18	OK	5.377	25.7013	2.25697	5.37475	5e-05	0.000622834	AT4G14548.1	other RNA
XLOC_010152	XLOC_010152	AT2G41730	Chr2:17409253-17410397	WT	18	OK	42.1771	198.151	2.23207	7.05296	5e-05	0.000622834	AT2G41730.1	unknown protein; BEST Arabidopsis thaliana protein match is: unknown protein (TAIR:AT5G24640.1); Has 25 Blast hits to 25 proteins in 5 species: Archae - 0; Bacteria - 0; Metazoa - 0; Fungi - 0; Plants - 25; Viruses - 0; Other Eukaryotes - 0 (source: NCBI BLink).
XLOC_018523	XLOC_018523	AT3G48640	Chr3:18021399-18022609	WT	18	OK	0.263299	1.23359	2.2281	1.50376	0.00985	0.0496863	AT3G48640.1	unknown protein; FUNCTIONS IN: molecular_function unknown; INVOLVED IN: biological_process unknown; LOCATED IN: endomembrane system; EXPRESSED IN: 10 plant structures; EXPRESSED DURING: 10 growth stages; CONTAINS InterPro DOMAIN/s: Protein of unknown function DUF677 (InterPro:IPR007749); BEST Arabidopsis thaliana protein match is: Protein of unknown function (DUF677) (TAIR:AT5G66670.2); Has 42 Bl…
XLOC_006386	XLOC_006386	AT1G52100	Chr1:19383121-19385602	WT	18	OK	0.23993	1.11438	2.21556	1.93012	0.00135	0.0104169	AT1G52100.1	Mannose-binding lectin superfamily protein; FUNCTIONS IN: molecular_function unknown; INVOLVED IN: biological_process unknown; LOCATED IN: membrane; EXPRESSED IN: shoot, cotyledon, hypocotyl, leaf; CONTAINS InterPro DOMAIN/s: Mannose-binding lectin (InterPro:IPR001229); BEST Arabidopsis thaliana protein match is: Mannose-binding lectin superfamily protein (TAIR:AT5G35940.1); Has 1742 Blast hits t…
XLOC_006071	XLOC_006071	AT1G44180	Chr1:16807832-16810591	WT	18	OK	2.14384	9.92456	2.21081	5.30888	5e-05	0.000622834	AT1G44180.1	Peptidase M20/M25/M40 family protein; FUNCTIONS IN: hydrolase activity, aminoacylase activity; INVOLVED IN: metabolic process, cellular amino acid metabolic process; LOCATED IN: endomembrane system, cytoplasm; EXPRESSED IN: male gametophyte, pollen tube; EXPRESSED DURING: L mature pollen stage; CONTAINS InterPro DOMAIN/s: Peptidase M20 (InterPro:IPR002933), N-acyl-L-amino-acid amidohydrolase (Int…
XLOC_023465	XLOC_023465	AT4G26950	Chr4:13533476-13534359	WT	18	OK	1.23537	5.70072	2.2062	2.9491	5e-05	0.000622834	AT4G26950.1	Protein of unknown function, DUF584; CONTAINS InterPro DOMAIN/s: Protein of unknown function DUF584 (InterPro:IPR007608); BEST Arabidopsis thaliana protein match is: Protein of unknown function, DUF584 (TAIR:AT4G04630.1); Has 1807 Blast hits to 1807 proteins in 277 species: Archae - 0; Bacteria - 0; Metazoa - 736; Fungi - 347; Plants - 385; Viruses - 0; Other Eukaryotes - 339 (source: NCBI BLink).
XLOC_026446	XLOC_026446	AT5G44580	Chr5:17979310-17980411	WT	18	OK	3.0427	13.95	2.19684	5.50721	5e-05	0.000622834	AT5G44580.1	unknown protein; FUNCTIONS IN: molecular_function unknown; INVOLVED IN: biological_process unknown; LOCATED IN: endomembrane system; EXPRESSED IN: 18 plant structures; EXPRESSED DURING: 12 growth stages; BEST Arabidopsis thaliana protein match is: unknown protein (TAIR:AT5G44582.1); Has 30201 Blast hits to 17322 proteins in 780 species: Archae - 12; Bacteria - 1396; Metazoa - 17338; Fungi - 3422;…
XLOC_008931	XLOC_008931	AT2G19610	Chr2:8483939-8488933	WT	18	OK	1.42306	6.5187	2.19559	3.16048	0.00015	0.00165462	AT2G19610.2	RING/U-box superfamily protein; FUNCTIONS IN: zinc ion binding; EXPRESSED IN: leaf whorl, cotyledon, flower; EXPRESSED DURING: 4 anthesis; CONTAINS InterPro DOMAIN/s: Zinc finger, RING-type, conserved site (InterPro:IPR017907), Zinc finger, C6HC-type (InterPro:IPR002867), Zinc finger, RING-type (InterPro:IPR001841); BEST Arabidopsis thaliana protein match is: RING/U-box superfamily protein (TAIR:…
XLOC_020865	XLOC_020865	AT4G22960	Chr4:12030019-12033137	WT	18	OK	1.01888	4.60762	2.17704	4.55823	5e-05	0.000622834	AT4G22960.1	Protein of unknown function (DUF544) ; CONTAINS InterPro DOMAIN/s: Protein of unknown function DUF544 (InterPro:IPR007518); BEST Arabidopsis thaliana protein match is: Protein of unknown function (DUF544) (TAIR:AT4G11860.1); Has 737 Blast hits to 425 proteins in 174 species: Archae - 0; Bacteria - 23; Metazoa - 282; Fungi - 261; Plants - 75; Viruses - 0; Other Eukaryotes - 96 (source: NCBI BLink).
XLOC_007033	XLOC_007033	AT1G64920	Chr1:24117439-24118798	WT	18	OK	0.287124	1.2947	2.17287	2.46749	0.0026	0.0176271	AT1G64920.1	UDP-Glycosyltransferase superfamily protein; FUNCTIONS IN: transferase activity, transferring glycosyl groups; INVOLVED IN: metabolic process; LOCATED IN: cellular_component unknown; EXPRESSED IN: root; CONTAINS InterPro DOMAIN/s: UDP-glucuronosyl/UDP-glucosyltransferase (InterPro:IPR002213); BEST Arabidopsis thaliana protein match is: UDP-Glycosyltransferase superfamily protein (TAIR:AT1G64910.1…
XLOC_014549	XLOC_014549	AT3G28500	Chr3:10682096-10682731	WT	18	OK	0.747421	3.35044	2.16436	2.69918	0.0093	0.0478196	AT3G28500.1	60S acidic ribosomal protein family; FUNCTIONS IN: structural constituent of ribosome; INVOLVED IN: translational elongation; LOCATED IN: cytosol, cytosolic ribosome, ribosome, plasma membrane; EXPRESSED IN: 20 plant structures; EXPRESSED DURING: 11 growth stages; CONTAINS InterPro DOMAIN/s: Ribosomal protein 60S (InterPro:IPR001813); BEST Arabidopsis thaliana protein match is: 60S acidic ribosom…
XLOC_011903	XLOC_011903	AT2G26400	Chr2:11231799-11233295	WT	18	OK	32.6887	146.179	2.16087	9.05895	5e-05	0.000622834	AT2G26400.1	Encodes a protein predicted to belong to the acireductone dioxygenase (ARD/ARD?)family.
XLOC_019035	XLOC_019035	AT3G58150	Chr3:21532772-21534089	WT	18	OK	3.32576	14.8491	2.15862	4.21726	5e-05	0.000622834	AT3G58150.1	Optic atrophy 3 protein (OPA3); CONTAINS InterPro DOMAIN/s: Optic atrophy 3-like (InterPro:IPR010754); BEST Arabidopsis thaliana protein match is: Optic atrophy 3 protein (OPA3) (TAIR:AT1G28510.1); Has 387 Blast hits to 383 proteins in 168 species: Archae - 0; Bacteria - 0; Metazoa - 134; Fungi - 117; Plants - 78; Viruses - 0; Other Eukaryotes - 58 (source: NCBI BLink).
XLOC_026865	XLOC_026865	AT5G52350	Chr5:21254910-21257786	WT	18	OK	0.613099	2.73696	2.15838	3.6112	5e-05	0.000622834	AT5G52350.1	A member of EXO70 gene family, putative exocyst subunits, conserved in land plants. Arabidopsis thaliana contains 23 putative EXO70 genes, which can be classified into eight clusters on the phylogenetic tree.
XLOC_026312	XLOC_026312	AT5G42460	Chr5:16979772-16981115	WT	18	OK	4.34944	19.3449	2.15305	6.7274	5e-05	0.000622834	AT5G42460.1	F-box and associated interaction domains-containing protein; CONTAINS InterPro DOMAIN/s: F-box domain, cyclin-like (InterPro:IPR001810), F-box domain, Skp2-like (InterPro:IPR022364), F-box associated domain, type 1 (InterPro:IPR006527), F-box associated interaction domain (InterPro:IPR017451); BEST Arabidopsis thaliana protein match is: F-box and associated interaction domains-containing protein …
XLOC_022476	XLOC_022476	AT4G09780	Chr4:6159537-6161378	WT	18	OK	0.969476	4.30833	2.15185	3.16425	5e-05	0.000622834	AT4G09780.1	TRAF-like family protein; FUNCTIONS IN: molecular_function unknown; INVOLVED IN: biological_process unknown; LOCATED IN: endomembrane system; CONTAINS InterPro DOMAIN/s: TRAF-like (InterPro:IPR008974), MATH (InterPro:IPR002083); BEST Arabidopsis thaliana protein match is: TRAF-like family protein (TAIR:AT4G09770.2); Has 574 Blast hits to 539 proteins in 30 species: Archae - 0; Bacteria - 0; Metaz…
XLOC_007729	XLOC_007729	AT1G78360	Chr1:29481860-29483053	WT	18	OK	1.06016	4.69846	2.1479	2.84849	5e-05	0.000622834	AT1G78360.1	Encodes glutathione transferase belonging to the tau class of GSTs. Naming convention according to Wagner et al. (2002).
XLOC_012543	XLOC_012543	AT2G37810	Chr2:15845349-15846051	WT	18	OK	1.08299	4.77374	2.1401	3.81186	0.0004	0.00385261	AT2G37810.1	Cysteine/Histidine-rich C1 domain family protein; CONTAINS InterPro DOMAIN/s: DC1 (InterPro:IPR004146), C1-like (InterPro:IPR011424); BEST Arabidopsis thaliana protein match is: Cysteine/Histidine-rich C1 domain family protein (TAIR:AT2G37800.1); Has 1776 Blast hits to 724 proteins in 47 species: Archae - 0; Bacteria - 0; Metazoa - 55; Fungi - 0; Plants - 1705; Viruses - 0; Other Eukaryotes - 16 …
XLOC_006389	XLOC_006389	AT1G52130	Chr1:19400443-19402877	WT	18	OK	5.13059	22.538	2.13516	6.13502	5e-05	0.000622834	AT1G52130.1	Mannose-binding lectin superfamily protein; CONTAINS InterPro DOMAIN/s: Mannose-binding lectin (InterPro:IPR001229); BEST Arabidopsis thaliana protein match is: Mannose-binding lectin superfamily protein (TAIR:AT1G52120.1); Has 1505 Blast hits to 643 proteins in 30 species: Archae - 0; Bacteria - 0; Metazoa - 0; Fungi - 0; Plants - 1504; Viruses - 0; Other Eukaryotes - 1 (source: NCBI BLink).
XLOC_003699	XLOC_003699	AT1G74870	Chr1:28126927-28128463	WT	18	OK	0.939668	4.10386	2.12676	3.86655	5e-05	0.000622834	AT1G74870.1	RING/U-box superfamily protein; FUNCTIONS IN: zinc ion binding; EXPRESSED IN: sperm cell, sepal, flower; EXPRESSED DURING: 4 anthesis, petal differentiation and expansion stage; CONTAINS InterPro DOMAIN/s: Zinc finger, RING-type (InterPro:IPR001841); BEST Arabidopsis thaliana protein match is: RING/U-box superfamily protein (TAIR:AT3G48070.1); Has 508 Blast hits to 508 proteins in 180 species: Ar…
XLOC_010927	XLOC_010927	AT2G07719	Chr2:3432794-3433495	WT	18	OK	1.8249	7.93642	2.12067	4.45708	5e-05	0.000622834	AT2G07719.1	Putative membrane lipoprotein; FUNCTIONS IN: molecular_function unknown; INVOLVED IN: biological_process unknown; LOCATED IN: endomembrane system; BEST Arabidopsis thaliana protein match is: Putative membrane lipoprotein (TAIR:ATMG00610.1); Has 6 Blast hits to 6 proteins in 2 species: Archae - 0; Bacteria - 0; Metazoa - 0; Fungi - 0; Plants - 6; Viruses - 0; Other Eukaryotes - 0 (source: NCBI BLi…
XLOC_007350	XLOC_007350	AT1G70440	Chr1:26545260-26550585	WT	18	OK	5.34355	22.6628	2.08445	3.93422	5e-05	0.000622834	AT1G70440.1	Encodes a protein with similarity to RCD1 but without the WWE domain. The protein does have a PARP signature upstream of the C-terminal protein interaction domain. The PARP signature may bind NAD+ and attach the ADP-ribose-moiety from NAD+ to the target molecule. Its presence suggests a role for the protein in ADP ribosylation.
XLOC_007935	XLOC_007935	AT2G02120	Chr2:538249-539055	WT	18	OK	4.15853	17.4617	2.07005	5.7342	5e-05	0.000622834	AT2G02120.1	Predicted to encode a PR (pathogenesis-related) protein. Belongs to the plant defensin (PDF) family with the following members: At1g75830/PDF1.1, At5g44420/PDF1.2a, At2g26020/PDF1.2b, At5g44430/PDF1.2c, At2g26010/PDF1.3, At1g19610/PDF1.4, At1g55010/PDF1.5, At2g02120/PDF2.1, At2g02100/PDF2.2, At2g02130/PDF2.3, At1g61070/PDF2.4, At5g63660/PDF2.5, At2g02140/PDF2.6, At5g38330/PDF3.1 and At4g30070/PDF…
XLOC_008295	XLOC_008295	AT2G07783	Chr2:3297895-3300043	WT	18	OK	0.865052	3.60933	2.06087	4.36497	5e-05	0.000622834	AT2G07783.1	pseudogene, similar to Ccl1, blastp match of 86% identity and 6.4e-177 P-value to GP|1694629|dbj|BAA12329.1||D84373 Ccl1 {Brassica napus}
XLOC_030873	XLOC_030873	AT5G61730	Chr5:24793863-24812736	WT	18	OK	0.379417	1.5787	2.05688	2.31419	0.00065	0.00575485	AT5G61730.1	member of ATH subfamily
XLOC_022642	XLOC_022642	AT4G12735	Chr4:7493715-7494234	WT	18	OK	62.0156	256.168	2.04639	10.5618	5e-05	0.000622834	AT4G12735.1	unknown protein; FUNCTIONS IN: molecular_function unknown; INVOLVED IN: biological_process unknown; LOCATED IN: plasma membrane; EXPRESSED IN: rosette leaf, cultured cell; BEST Arabidopsis thaliana protein match is: unknown protein (TAIR:AT4G12731.1); Has 35333 Blast hits to 34131 proteins in 2444 species: Archae - 798; Bacteria - 22429; Metazoa - 974; Fungi - 991; Plants - 531; Viruses - 0; Othe…
XLOC_000737	XLOC_000737	AT1G15610	Chr1:5370676-5371859	WT	18	OK	0.504121	2.07589	2.04189	1.78062	0.00495	0.0294498	AT1G15610.1	unknown protein; BEST Arabidopsis thaliana protein match is: unknown protein (TAIR:AT1G15630.1); Has 129 Blast hits to 129 proteins in 15 species: Archae - 0; Bacteria - 2; Metazoa - 0; Fungi - 0; Plants - 127; Viruses - 0; Other Eukaryotes - 0 (source: NCBI BLink).
XLOC_004253	XLOC_004253	AT1G05670,AT1G05675	Chr1:1697466-1702749	WT	18	OK	4.13803	17.0164	2.03991	5.53598	5e-05	0.000622834	AT1G05670.1	Pentatricopeptide repeat (PPR-like) superfamily protein; CONTAINS InterPro DOMAIN/s: Pentatricopeptide repeat (InterPro:IPR002885); BEST Arabidopsis thaliana protein match is: Tetratricopeptide repeat (TPR)-like superfamily protein (TAIR:AT5G01110.1); Has 76919 Blast hits to 23782 proteins in 722 species: Archae - 3; Bacteria - 657; Metazoa - 3612; Fungi - 1352; Plants - 68766; Viruses - 129; Oth…
XLOC_000828	XLOC_000828	AT1G17180	Chr1:5872144-5873086	WT	18	OK	60.3157	247.725	2.03813	8.46895	5e-05	0.000622834	AT1G17180.1	Encodes glutathione transferase belonging to the tau class of GSTs. Naming convention according to Wagner et al. (2002).
XLOC_008737	XLOC_008737	AT2G16050	Chr2:6980449-6982101	WT	18	OK	2.811	11.4139	2.02163	5.13386	5e-05	0.000622834	AT2G16050.1	Cysteine/Histidine-rich C1 domain family protein; CONTAINS InterPro DOMAIN/s: DC1 (InterPro:IPR004146); BEST Arabidopsis thaliana protein match is: Cysteine/Histidine-rich C1 domain family protein (TAIR:AT1G20990.1); Has 30201 Blast hits to 17322 proteins in 780 species: Archae - 12; Bacteria - 1396; Metazoa - 17338; Fungi - 3422; Plants - 5037; Viruses - 0; Other Eukaryotes - 2996 (source: NCBI …
XLOC_024197	XLOC_024197	AT5G01740	Chr5:280721-281445	WT	18	OK	0.815499	3.23793	1.98932	3.00141	0.00255	0.017362	AT5G01740.1	Nuclear transport factor 2 (NTF2) family protein; CONTAINS InterPro DOMAIN/s: Wound-induced protein, Wun1 (InterPro:IPR009798); BEST Arabidopsis thaliana protein match is: senescence associated gene 20 (TAIR:AT3G10985.1); Has 1807 Blast hits to 1807 proteins in 277 species: Archae - 0; Bacteria - 0; Metazoa - 736; Fungi - 347; Plants - 385; Viruses - 0; Other Eukaryotes - 339 (source: NCBI BLink).
XLOC_022601	XLOC_022601	AT4G12100	Chr4:7246421-7248127	WT	18	OK	0.633167	2.51183	1.98808	3.32545	0.0001	0.00115693	AT4G12100.1	Cullin family protein; FUNCTIONS IN: ubiquitin protein ligase binding; INVOLVED IN: ubiquitin-dependent protein catabolic process; LOCATED IN: cullin-RING ubiquitin ligase complex; CONTAINS InterPro DOMAIN/s: Cullin, N-terminal (InterPro:IPR001373), Cullin repeat-like-containing domain (InterPro:IPR016159); BEST Arabidopsis thaliana protein match is: cullin4 (TAIR:AT5G46210.1); Has 1267 Blast hit…
XLOC_005300	XLOC_005300	AT1G26380	Chr1:9126736-9128528	WT	18	OK	3.21645	12.7311	1.98481	5.84366	5e-05	0.000622834	AT1G26380.1	FAD-binding Berberine family protein; FUNCTIONS IN: electron carrier activity, oxidoreductase activity, FAD binding, catalytic activity; LOCATED IN: endomembrane system; EXPRESSED IN: 9 plant structures; EXPRESSED DURING: LP.06 six leaves visible, LP.04 four leaves visible, 4 anthesis, LP.08 eight leaves visible; CONTAINS InterPro DOMAIN/s: FAD-binding, type 2 (InterPro:IPR016166), Berberine/berb…
XLOC_029638	XLOC_029638	AT5G39100	Chr5:15653089-15654020	WT	18	OK	3.19984	12.5143	1.9675	5.23061	5e-05	0.000622834	AT5G39100.1	germin-like protein (GLP6)
XLOC_016578	XLOC_016578	AT3G08810	Chr3:2667880-2676707	WT	18	OK	1.08582	4.23123	1.96229	1.94405	0.00285	0.0188984	AT3G08810.1	Galactose oxidase/kelch repeat superfamily protein; CONTAINS InterPro DOMAIN/s: F-box domain, cyclin-like (InterPro:IPR001810), Galactose oxidase/kelch, beta-propeller (InterPro:IPR011043), Kelch repeat type 1 (InterPro:IPR006652), Kelch-type beta propeller (InterPro:IPR015915); BEST Arabidopsis thaliana protein match is: Galactose oxidase/kelch repeat superfamily protein (TAIR:AT5G51250.1); Has …
XLOC_017723	XLOC_017723	AT3G29156.1	Chr3:11122867-11127592	WT	18	OK	0.396362	1.53884	1.95696	3.8922	5e-05	0.000622834	AT3G29156.1	transposable element gene; copia-like retrotransposon family, has a 2.9e-175 P-value blast match to GB:AAC02666 polyprotein (Ty1_Copia-element) (Arabidopsis thaliana)
XLOC_014550	XLOC_014550	AT3G28510	Chr3:10685523-10687364	WT	18	OK	25.5426	99.0404	1.95511	6.90407	5e-05	0.000622834	AT3G28510.1	P-loop containing nucleoside triphosphate hydrolases superfamily protein; FUNCTIONS IN: nucleoside-triphosphatase activity, ATPase activity, nucleotide binding, ATP binding; EXPRESSED IN: 7 plant structures; EXPRESSED DURING: LP.06 six leaves visible, LP.04 four leaves visible, 4 anthesis, 4 leaf senescence stage; CONTAINS InterPro DOMAIN/s: ATPase, AAA-type, core (InterPro:IPR003959), ATPase, AA…
XLOC_019697	XLOC_019697	AT4G04990	Chr4:2555089-2557046	WT	18	OK	1.17464	4.54641	1.95251	3.69656	5e-05	0.000622834	AT4G04990.1	Protein of unknown function (DUF761); FUNCTIONS IN: molecular_function unknown; INVOLVED IN: biological_process unknown; LOCATED IN: endomembrane system; CONTAINS InterPro DOMAIN/s: Protein of unknown function DUF761, plant (InterPro:IPR008480); BEST Arabidopsis thaliana protein match is: Protein of unknown function (DUF761) (TAIR:AT1G61260.1); Has 30201 Blast hits to 17322 proteins in 780 specie…
XLOC_003735	XLOC_003735	AT1G75600	Chr1:28390664-28391778	WT	18	OK	1.66923	6.37374	1.93295	2.44903	0.0005	0.00460825	AT1G75600.1	Histone superfamily protein; FUNCTIONS IN: DNA binding; INVOLVED IN: nucleosome assembly; LOCATED IN: nucleosome; EXPRESSED IN: root, flower, leaf, pollen tube; EXPRESSED DURING: seedling growth; CONTAINS InterPro DOMAIN/s: Histone H3 (InterPro:IPR000164), Histone-fold (InterPro:IPR009072), Histone core (InterPro:IPR007125); BEST Arabidopsis thaliana protein match is: Histone superfamily protein …
XLOC_023704	XLOC_023704	AT4G31520	Chr4:15278103-15282023	WT	18	OK	1.22287	4.65374	1.92812	3.96986	5e-05	0.000622834	AT4G31520.1	SDA1 family protein; FUNCTIONS IN: binding; INVOLVED IN: biological_process unknown; LOCATED IN: cellular_component unknown; EXPRESSED IN: flower; EXPRESSED DURING: petal differentiation and expansion stage; CONTAINS InterPro DOMAIN/s: Domain of unknown function, nucleolar NUC130/133, N-terminal (InterPro:IPR012977), Armadillo-type fold (InterPro:IPR016024), SDA1 (InterPro:IPR007949); BEST Arabid…
XLOC_030463	XLOC_030463	AT5G53730	Chr5:21807973-21808810	WT	18	OK	2.87324	10.8292	1.91418	4.9201	5e-05	0.000622834	AT5G53730.1	Late embryogenesis abundant (LEA) hydroxyproline-rich glycoprotein family; CONTAINS InterPro DOMAIN/s: Late embryogenesis abundant protein, group 2 (InterPro:IPR004864); BEST Arabidopsis thaliana protein match is: Late embryogenesis abundant (LEA) hydroxyproline-rich glycoprotein family (TAIR:AT3G44220.1); Has 1807 Blast hits to 1807 proteins in 277 species: Archae - 0; Bacteria - 0; Metazoa - 73…
XLOC_007970	XLOC_007970	AT2G02690	Chr2:749912-751918	WT	18	OK	0.62075	2.32501	1.90516	3.08753	5e-05	0.000622834	AT2G02690.1	Cysteine/Histidine-rich C1 domain family protein; FUNCTIONS IN: zinc ion binding; INVOLVED IN: intracellular signaling pathway; CONTAINS InterPro DOMAIN/s: Protein kinase C-like, phorbol ester/diacylglycerol binding (InterPro:IPR002219), Zinc finger, PHD-type (InterPro:IPR001965), DC1 (InterPro:IPR004146), C1-like (InterPro:IPR011424); BEST Arabidopsis thaliana protein match is: Cysteine/Histidin…
XLOC_030256	XLOC_030256	AT5G49690	Chr5:20189616-20193429	WT	18	OK	2.54916	9.54636	1.90493	4.58981	5e-05	0.000622834	AT5G49690.1	UDP-Glycosyltransferase superfamily protein; FUNCTIONS IN: transferase activity, transferring glycosyl groups; INVOLVED IN: metabolic process; CONTAINS InterPro DOMAIN/s: UDP-glucuronosyl/UDP-glucosyltransferase (InterPro:IPR002213); BEST Arabidopsis thaliana protein match is: UDP-Glycosyltransferase superfamily protein (TAIR:AT5G65550.1); Has 1807 Blast hits to 1807 proteins in 277 species: Arch…
XLOC_022858	XLOC_022858	AT4G15990	Chr4:9060726-9061759	WT	18	OK	17.4383	64.8871	1.89567	5.50927	5e-05	0.000622834	AT4G15990.1	unknown protein; BEST Arabidopsis thaliana protein match is: unknown protein (TAIR:AT4G16024.1); Has 14 Blast hits to 14 proteins in 2 species: Archae - 0; Bacteria - 0; Metazoa - 0; Fungi - 0; Plants - 14; Viruses - 0; Other Eukaryotes - 0 (source: NCBI BLink).
XLOC_025420	XLOC_025420	AT5G27130	Chr5:9546546-9547553	WT	18	OK	0.399702	1.47599	1.88468	2.17078	0.0058	0.0333092	AT5G27130.1	AGAMOUS-like 39 (AGL39); FUNCTIONS IN: DNA binding, sequence-specific DNA binding transcription factor activity; INVOLVED IN: regulation of transcription, DNA-dependent; LOCATED IN: nucleus; CONTAINS InterPro DOMAIN/s: Transcription factor, MADS-box (InterPro:IPR002100); BEST Arabidopsis thaliana protein match is: MADS-box transcription factor family protein (TAIR:AT1G48150.1); Has 663 Blast hits…
XLOC_015348	XLOC_015348	AT3G47740	Chr3:17600639-17605080	WT	18	OK	0.354165	1.30746	1.88428	2.95054	5e-05	0.000622834	AT3G47740.1	member of ATH subfamily
XLOC_031041	XLOC_031041	AT5G65100	Chr5:26003666-26008508	WT	18	OK	0.374213	1.3791	1.88179	1.82625	0.00715	0.0392132	AT5G65100.1	Ethylene insensitive 3 family protein; FUNCTIONS IN: sequence-specific DNA binding transcription factor activity; INVOLVED IN: regulation of transcription; LOCATED IN: nucleus; EXPRESSED IN: flower; EXPRESSED DURING: petal differentiation and expansion stage; CONTAINS InterPro DOMAIN/s: Ethylene insensitive 3 (InterPro:IPR006957); BEST Arabidopsis thaliana protein match is: Ethylene insensitive 3…
XLOC_026040	XLOC_026040	AT5G38005	Chr5:15155066-15156088	WT	18	OK	19.5098	71.8943	1.88168	8.0932	5e-05	0.000622834	AT5G38005.1	Unknown gene
XLOC_015978	XLOC_015978	AT3G60100	Chr3:22192727-22196728	WT	18	OK	0.548951	2.02168	1.8808	2.78589	5e-05	0.000622834	AT3G60100.1	citrate synthase 5 (CSY5); FUNCTIONS IN: citrate (SI)-synthase activity, transferase activity, transferring acyl groups, acyl groups converted into alkyl on transfer; INVOLVED IN: cellular carbohydrate metabolic process, tricarboxylic acid cycle; LOCATED IN: mitochondrion; EXPRESSED IN: 8 plant structures; EXPRESSED DURING: M germinated pollen stage, 4 anthesis, 4 leaf senescence stage, petal dif…
XLOC_004660	XLOC_004660	AT1G13370	Chr1:4587779-4588613	WT	18	OK	1.45294	5.32817	1.87467	3.53215	0.0007	0.00608993	AT1G13370.1	Histone superfamily protein; FUNCTIONS IN: DNA binding; INVOLVED IN: nucleosome assembly; LOCATED IN: chloroplast, nucleosome; EXPRESSED IN: root, inflorescence, flower, leaf; EXPRESSED DURING: seedling growth; CONTAINS InterPro DOMAIN/s: Histone H3 (InterPro:IPR000164), Histone-fold (InterPro:IPR009072), Histone core (InterPro:IPR007125); BEST Arabidopsis thaliana protein match is: Histone super…
XLOC_026135	XLOC_026135	AT5G39630	Chr5:15867847-15869839	WT	18	OK	0.67745	2.48418	1.87458	1.95035	0.00325	0.0211196	AT5G39630.1	Vesicle transport v-SNARE family protein; FUNCTIONS IN: SNARE binding, receptor activity; INVOLVED IN: cellular membrane fusion, intra-Golgi vesicle-mediated transport; LOCATED IN: membrane; CONTAINS InterPro DOMAIN/s: Vesicle transport v-SNARE, N-terminal (InterPro:IPR007705); BEST Arabidopsis thaliana protein match is: Vesicle transport v-SNARE family protein (TAIR:AT5G39510.1); Has 1365 Blast …
XLOC_008308	XLOC_008308	AT2G07703.1	Chr2:3375515-3381446	WT	18	OK	1.23584	4.52416	1.87216	3.47811	5e-05	0.000622834	AT2G07703.1	transposable element gene; copia-like retrotransposon family, has a 5.2e-10 P-value blast match to dbj|BAA78425.1| polyprotein (Arabidopsis thaliana) (AtRE1) (Ty1_Copia-element)
XLOC_026526	XLOC_026526	AT5G45990	Chr5:18651323-18653892	WT	18	OK	1.70799	6.24798	1.87109	4.53728	5e-05	0.000622834	AT5G45990.1	crooked neck protein, putative / cell cycle protein, putative; FUNCTIONS IN: binding; INVOLVED IN: mRNA processing, RNA processing; LOCATED IN: intracellular, nucleus; CONTAINS InterPro DOMAIN/s: RNA-processing protein, HAT helix (InterPro:IPR003107), Tetratricopeptide-like helical (InterPro:IPR011990), Tetratricopeptide repeat-containing (InterPro:IPR013026), Suppressor of forked (InterPro:IPR00…
XLOC_006069	XLOC_006069	AT1G44130	Chr1:16787507-16789318	WT	18	OK	1.67771	6.11956	1.86694	4.28589	5e-05	0.000622834	AT1G44130.1	Eukaryotic aspartyl protease family protein; FUNCTIONS IN: aspartic-type endopeptidase activity; INVOLVED IN: proteolysis; LOCATED IN: plant-type cell wall; EXPRESSED IN: stem, embryo, pedicel, stamen; EXPRESSED DURING: 4 anthesis, C globular stage, petal differentiation and expansion stage; CONTAINS InterPro DOMAIN/s: Peptidase aspartic (InterPro:IPR021109), Peptidase aspartic, catalytic (InterP…
XLOC_011476	XLOC_011476	AT2G18660	Chr2:8090657-8091656	WT	18	OK	1.10053	4.01125	1.86586	3.20683	0.001	0.00815767	AT2G18660.1	Encodes PNP-A (Plant Natriuretic Peptide A). PNPs are a class of systemically mobile molecules distantly related to expansins; their biological role has remained elusive. PNP-A contains a signal peptide domain and is secreted into the extracellular space. Co-expression analyses using microarray data suggest that PNP-A may function as a component of plant defence response and SAR in particular, an…
XLOC_025320	XLOC_025320	AT5G25280	Chr5:8773510-8776000	WT	18	OK	64.2724	232.118	1.85259	5.87271	5e-05	0.000622834	AT5G25280.1	serine-rich protein-related; BEST Arabidopsis thaliana protein match is: serine-rich protein-related (TAIR:AT5G11090.1); Has 1306 Blast hits to 350 proteins in 64 species: Archae - 0; Bacteria - 8; Metazoa - 365; Fungi - 73; Plants - 167; Viruses - 0; Other Eukaryotes - 693 (source: NCBI BLink).
XLOC_023225	XLOC_023225	AT4G22390	Chr4:11813296-11815370	WT	18	OK	1.09565	3.94648	1.84877	3.30809	5e-05	0.000622834	AT4G22390.1	F-box associated ubiquitination effector family protein; CONTAINS InterPro DOMAIN/s: F-box associated interaction domain (InterPro:IPR017451); BEST Arabidopsis thaliana protein match is: F-box and associated interaction domains-containing protein (TAIR:AT4G12560.2); Has 30201 Blast hits to 17322 proteins in 780 species: Archae - 12; Bacteria - 1396; Metazoa - 17338; Fungi - 3422; Plants - 5037; V…
XLOC_009181	XLOC_009181	AT2G23960	Chr2:10196058-10197610	WT	18	OK	8.85979	31.9013	1.84827	6.12882	5e-05	0.000622834	AT2G23960.1	Class I glutamine amidotransferase-like superfamily protein; FUNCTIONS IN: catalytic activity; INVOLVED IN: defense response; LOCATED IN: cellular_component unknown; EXPRESSED IN: 7 plant structures; EXPRESSED DURING: LP.04 four leaves visible, F mature embryo stage; CONTAINS InterPro DOMAIN/s: Glutamine amidotransferase class-I, C-terminal (InterPro:IPR000991), Glutamine amidotransferase type 1 …
XLOC_029706	XLOC_029706	AT5G40010	Chr5:16020217-16021762	WT	18	OK	17.6516	63.3547	1.84366	6.85778	5e-05	0.000622834	AT5G40010.1	Encodes a mitochondrial ATPase involved in seed and silique development.
XLOC_022691	XLOC_022691	AT4G13300	Chr4:7742870-7746397	WT	18	OK	5.59167	20.0423	1.8417	5.49888	5e-05	0.000622834	AT4G13300.1	Catalyzes the conversion of farnesyl diphosphate to (Z)-gamma-bisabolene and the additional minor products E-nerolidol and alpha-bisabolol. Expressed in cortex and sub-epidermal layers of roots, leaf hydathodes and flower stigmata. Induced by wounding.
XLOC_012481	XLOC_012481	AT2G36770	Chr2:15415138-15416766	WT	18	OK	0.752923	2.69833	1.84149	3.25981	5e-05	0.000622834	AT2G36770.1	UDP-Glycosyltransferase superfamily protein; FUNCTIONS IN: transferase activity, transferring hexosyl groups, UDP-glycosyltransferase activity, transferase activity, transferring glycosyl groups; INVOLVED IN: metabolic process; LOCATED IN: cellular_component unknown; CONTAINS InterPro DOMAIN/s: UDP-glucuronosyl/UDP-glucosyltransferase (InterPro:IPR002213); BEST Arabidopsis thaliana protein match …
XLOC_013717	XLOC_013717	AT3G13950	Chr3:4604148-4605425	WT	18	OK	0.98214	3.50163	1.83402	3.26543	0.00105	0.008471	AT3G13950.1	unknown protein; BEST Arabidopsis thaliana protein match is: unknown protein (TAIR:AT4G13266.1); Has 339 Blast hits to 265 proteins in 12 species: Archae - 0; Bacteria - 0; Metazoa - 0; Fungi - 0; Plants - 339; Viruses - 0; Other Eukaryotes - 0 (source: NCBI BLink).
XLOC_026479	XLOC_026479	AT5G45095	Chr5:18207362-18209045	WT	18	OK	0.597876	2.11648	1.82375	3.29038	0.00045	0.00422513	AT5G45095.1	unknown protein; FUNCTIONS IN: molecular_function unknown; INVOLVED IN: biological_process unknown; LOCATED IN: endomembrane system; BEST Arabidopsis thaliana protein match is: unknown protein (TAIR:AT4G08593.1); Has 25 Blast hits to 25 proteins in 2 species: Archae - 0; Bacteria - 0; Metazoa - 0; Fungi - 0; Plants - 25; Viruses - 0; Other Eukaryotes - 0 (source: NCBI BLink).
XLOC_002752	XLOC_002752	AT1G56600	Chr1:21207536-21209596	WT	18	OK	3.45991	12.1421	1.81121	5.14893	5e-05	0.000622834	AT1G56600.1	GolS2 is a galactinol synthase that catalyzes the formation of galactinol from UDP-galactose and myo-inositol. GolS2 transcript levels rise in response to methyl viologen, an oxidative damage-inducing agent. Plants over-expressing GolS2 have increased tolerance to salt, chilling, and high-light stress.
XLOC_017352	XLOC_017352	AT3G23167	Chr3:8266104-8266815	WT	18	OK	2.41493	8.43972	1.80521	2.49011	0.0005	0.00460825	AT3G23167.1	Encodes a member of a family of small,secreted, cysteine rich protein with sequence similarity to the PCP (pollen coat protein) gene family.
XLOC_026882	XLOC_026882	AT5G52680	Chr5:21365622-21366987	WT	18	OK	2.60425	8.96521	1.78347	3.35753	5e-05	0.000622834	AT5G52680.1	Copper transport protein family; BEST Arabidopsis thaliana protein match is: Copper transport protein family (TAIR:AT5G52690.1); Has 1807 Blast hits to 1807 proteins in 277 species: Archae - 0; Bacteria - 0; Metazoa - 736; Fungi - 347; Plants - 385; Viruses - 0; Other Eukaryotes - 339 (source: NCBI BLink).
XLOC_024176	XLOC_024176	AT5G01200	Chr5:77115-78543	WT	18	OK	1.29086	4.43869	1.7818	3.48242	5e-05	0.000622834	AT5G01200.1	Duplicated homeodomain-like superfamily protein; CONTAINS InterPro DOMAIN/s: Molecular chaperone, heat shock protein, Hsp40, DnaJ (InterPro:IPR015609), SANT, eukarya (InterPro:IPR017884), Myb-like DNA-binding domain, SHAQKYF class (InterPro:IPR006447), SANT, DNA-binding (InterPro:IPR001005), Myb, DNA-binding (InterPro:IPR014778), Homeodomain-like (InterPro:IPR009057), HTH transcriptional regulato…
XLOC_010016	XLOC_010016	AT2G39400	Chr2:16452611-16454801	WT	18	OK	3.88204	13.3184	1.77853	4.9799	5e-05	0.000622834	AT2G39400.1	alpha/beta-Hydrolases superfamily protein; BEST Arabidopsis thaliana protein match is: alpha/beta-Hydrolases superfamily protein (TAIR:AT3G55180.1); Has 4815 Blast hits to 4811 proteins in 1490 species: Archae - 34; Bacteria - 3394; Metazoa - 137; Fungi - 136; Plants - 554; Viruses - 35; Other Eukaryotes - 525 (source: NCBI BLink).
XLOC_015265	XLOC_015265	AT3G46190	Chr3:16965083-16967652	WT	18	OK	1.17303	3.98368	1.76386	2.72148	5e-05	0.000622834	AT3G46190.1	TRAF-like family protein; CONTAINS InterPro DOMAIN/s: TRAF-like (InterPro:IPR008974), MATH (InterPro:IPR002083), TRAF-type (InterPro:IPR013322); BEST Arabidopsis thaliana protein match is: TRAF-like family protein (TAIR:AT1G58270.1); Has 980 Blast hits to 953 proteins in 88 species: Archae - 0; Bacteria - 0; Metazoa - 314; Fungi - 12; Plants - 614; Viruses - 0; Other Eukaryotes - 40 (source: NCBI…
XLOC_001272	XLOC_001272	AT1G26240	Chr1:9077921-9079576	WT	18	OK	44.592	150.968	1.75939	7.00834	5e-05	0.000622834	AT1G26240.1	Proline-rich extensin-like family protein; FUNCTIONS IN: structural constituent of cell wall; INVOLVED IN: plant-type cell wall organization; LOCATED IN: endomembrane system; EXPRESSED IN: root; CONTAINS InterPro DOMAIN/s: Extensin-like repeat (InterPro:IPR006706); BEST Arabidopsis thaliana protein match is: Proline-rich extensin-like family protein (TAIR:AT4G08370.1); Has 364257 Blast hits to 37…
XLOC_008313	XLOC_008313	AT2G07715,AT2G07718	Chr2:3409675-3429733	WT	18	OK	5.26214	17.7169	1.75141	4.12517	5e-05	0.000622834	AT2G07715.1	Nucleic acid-binding, OB-fold-like protein; FUNCTIONS IN: structural constituent of ribosome; INVOLVED IN: translation; LOCATED IN: mitochondrion, ribosome, intracellular, large ribosomal subunit; CONTAINS InterPro DOMAIN/s: Nucleic acid-binding, OB-fold (InterPro:IPR012340), Nucleic acid-binding, OB-fold-like (InterPro:IPR016027), Ribosomal Proteins L2, RNA binding domain (InterPro:IPR022666), R…
XLOC_002445	XLOC_002445	AT1G51010	Chr1:18911596-18911845	WT	18	OK	8.61993	29.009	1.75075	7.03725	0.0005	0.00460825	AT1G51010.1	unknown protein; BEST Arabidopsis thaliana protein match is: unknown protein (TAIR:AT1G51020.1); Has 334 Blast hits to 303 proteins in 107 species: Archae - 20; Bacteria - 126; Metazoa - 41; Fungi - 13; Plants - 30; Viruses - 2; Other Eukaryotes - 102 (source: NCBI BLink).
XLOC_028520	XLOC_028520	AT5G17810	Chr5:5880442-5884770	WT	18	OK	0.393069	1.31408	1.7412	1.54793	0.00455	0.0276229	AT5G17810.1	Encodes a WUSCHEL-related homeobox gene family member with 65 amino acids in its homeodomain. Proteins in this family contain a sequence of eight residues (TLPLFPMH) downstream of the homeodomain called the WUS box.
XLOC_026993	XLOC_026993	AT5G54370	Chr5:22075282-22076777	WT	18	OK	3.99806	13.3572	1.74025	4.97822	5e-05	0.000622834	AT5G54370.1	Late embryogenesis abundant (LEA) protein-related; FUNCTIONS IN: molecular_function unknown; INVOLVED IN: biological_process unknown; LOCATED IN: endomembrane system; EXPRESSED IN: root; CONTAINS InterPro DOMAIN/s: Root cap (InterPro:IPR009646); BEST Arabidopsis thaliana protein match is: Late embryogenesis abundant (LEA) protein-related (TAIR:AT4G27400.1); Has 1807 Blast hits to 1807 proteins in…
XLOC_004379	XLOC_004379	AT1G08115	Chr1:2538075-2538237	WT	18	OK	36.7162	122.589	1.73934	21.8309	0.0011	0.00879749	AT1G08115.1	U1A small nuclear RNA
XLOC_010910	XLOC_010910	AT2G07811	Chr2:3313597-3314901	WT	18	OK	3.21334	10.7192	1.73805	4.77974	5e-05	0.000622834	AT2G07811.1	pseudogene of mitochondrial protein
XLOC_029639	XLOC_029639	AT5G39110	Chr5:15657801-15658584	WT	18	OK	15.9244	53.0273	1.7355	6.80865	5e-05	0.000622834	AT5G39110.1	RmlC-like cupins superfamily protein; FUNCTIONS IN: manganese ion binding, nutrient reservoir activity; INVOLVED IN: biological_process unknown; LOCATED IN: endomembrane system, apoplast; CONTAINS InterPro DOMAIN/s: Cupin, RmlC-type (InterPro:IPR011051), Cupin 1 (InterPro:IPR006045), RmlC-like jelly roll fold (InterPro:IPR014710), Germin (InterPro:IPR001929), Germin, manganese binding site (Inter…
XLOC_002934	XLOC_002934	AT1G60110	Chr1:22168501-22170649	WT	18	OK	0.591016	1.9629	1.73172	2.91972	0.0001	0.00115693	AT1G60110.1	Mannose-binding lectin superfamily protein; EXPRESSED IN: cultured cell; CONTAINS InterPro DOMAIN/s: Mannose-binding lectin (InterPro:IPR001229); BEST Arabidopsis thaliana protein match is: Mannose-binding lectin superfamily protein (TAIR:AT1G60130.1); Has 2034 Blast hits to 667 proteins in 34 species: Archae - 0; Bacteria - 0; Metazoa - 0; Fungi - 0; Plants - 2032; Viruses - 0; Other Eukaryotes …
XLOC_018821	XLOC_018821	AT3G54070	Chr3:20021258-20023821	WT	18	OK	0.325001	1.07582	1.72692	1.94669	0.00235	0.016259	AT3G54070.1	Ankyrin repeat family protein; CONTAINS InterPro DOMAIN/s: Ankyrin repeat-containing domain (InterPro:IPR020683), Ankyrin repeat (InterPro:IPR002110); BEST Arabidopsis thaliana protein match is: Ankyrin repeat family protein (TAIR:AT5G35810.1); Has 10613 Blast hits to 6237 proteins in 350 species: Archae - 27; Bacteria - 619; Metazoa - 5584; Fungi - 682; Plants - 1506; Viruses - 31; Other Eukaryo…
XLOC_005374	XLOC_005374	AT1G27890	Chr1:9714135-9715044	WT	18	OK	0.653112	2.15713	1.72371	2.38249	0.0048	0.0287721	AT1G27890.1	Polynucleotidyl transferase, ribonuclease H-like superfamily protein; FUNCTIONS IN: ribonuclease activity, nucleic acid binding; INVOLVED IN: RNA modification; LOCATED IN: nucleus; CONTAINS InterPro DOMAIN/s: Ribonuclease CAF1 (InterPro:IPR006941), Polynucleotidyl transferase, ribonuclease H fold (InterPro:IPR012337); BEST Arabidopsis thaliana protein match is: Polynucleotidyl transferase, ribonu…
XLOC_006383	XLOC_006383	AT1G52070	Chr1:19364887-19366924	WT	18	OK	3.3539	11.0696	1.72269	4.6108	5e-05	0.000622834	AT1G52070.1	Mannose-binding lectin superfamily protein; FUNCTIONS IN: molecular_function unknown; INVOLVED IN: biological_process unknown; LOCATED IN: endomembrane system; EXPRESSED IN: root; CONTAINS InterPro DOMAIN/s: Mannose-binding lectin (InterPro:IPR001229); BEST Arabidopsis thaliana protein match is: Mannose-binding lectin superfamily protein (TAIR:AT1G52060.1); Has 1736 Blast hits to 822 proteins in …
XLOC_018943	XLOC_018943	AT3G56350	Chr3:20893945-20895625	WT	18	OK	1.44299	4.75559	1.72056	3.34488	5e-05	0.000622834	AT3G56350.1	Iron/manganese superoxide dismutase family protein; FUNCTIONS IN: superoxide dismutase activity, metal ion binding; INVOLVED IN: oxidation reduction, superoxide metabolic process, removal of superoxide radicals; LOCATED IN: mitochondrion, endomembrane system; EXPRESSED IN: male gametophyte, seed; EXPRESSED DURING: seedling growth; CONTAINS InterPro DOMAIN/s: Manganese/iron superoxide dismutase, N…
XLOC_030974	XLOC_030974	AT5G63750	Chr5:25512993-25514941	WT	18	OK	3.53984	11.6577	1.71952	5.07648	5e-05	0.000622834	AT5G63750.1	ARIADNE 13 (ARI13); FUNCTIONS IN: zinc ion binding; LOCATED IN: intracellular; EXPRESSED IN: 6 plant structures; EXPRESSED DURING: 4 anthesis, petal differentiation and expansion stage; CONTAINS InterPro DOMAIN/s: Zinc finger, C6HC-type (InterPro:IPR002867), Zinc finger, RING-type (InterPro:IPR001841), Zinc finger, RanBP2-type (InterPro:IPR001876); BEST Arabidopsis thaliana protein match is: IBR …
XLOC_004892	XLOC_004892	AT1G17960	Chr1:6180859-6183866	WT	18	OK	5.97942	19.6725	1.7181	4.90793	5e-05	0.000622834	AT1G17960.1	Threonyl-tRNA synthetase; FUNCTIONS IN: nucleotide binding, aminoacyl-tRNA ligase activity, threonine-tRNA ligase activity, ATP binding; INVOLVED IN: threonyl-tRNA aminoacylation, translation, tRNA aminoacylation for protein translation; LOCATED IN: cytoplasm; EXPRESSED IN: inflorescence meristem, root, pedicel; EXPRESSED DURING: 4 anthesis; CONTAINS InterPro DOMAIN/s: Threonyl/alanyl tRNA synthe…
XLOC_006436	XLOC_006436	AT1G52880	Chr1:19688956-19690542	WT	18	OK	0.828659	2.72631	1.7181	3.08289	0.00015	0.00165462	AT1G52880.1	Transcription factor with a NAC domain. Homologous to the petunia gene NAM which is required for the development of the shoot. Expressed in the embryo.
XLOC_006782	XLOC_006782	AT1G60470	Chr1:22275483-22280586	WT	18	OK	13.2218	43.4739	1.71723	5.62626	5e-05	0.000622834	AT1G60470.1	Predicted to encode a galactinol synthase.
XLOC_023444	XLOC_023444	AT4G26560	Chr4:13406732-13407973	WT	18	OK	1.40433	4.61127	1.71528	3.05888	0.00135	0.0104169	AT4G26560.1	Encodes calcineurin B-like protein 7 (CBL7).
XLOC_029570	XLOC_029570	AT5G37730	Chr5:14985900-14988947	WT	18	OK	1.19069	3.90023	1.71176	1.65287	0.0067	0.0371636	AT5G37730.1	unknown protein; BEST Arabidopsis thaliana protein match is: unknown protein (TAIR:AT1G23150.1); Has 1807 Blast hits to 1807 proteins in 277 species: Archae - 0; Bacteria - 0; Metazoa - 736; Fungi - 347; Plants - 385; Viruses - 0; Other Eukaryotes - 339 (source: NCBI BLink).
XLOC_015980	XLOC_015980	AT3G60120	Chr3:22205928-22209150	WT	18	OK	5.53819	18.1305	1.71093	4.98332	5e-05	0.000622834	AT3G60120.1	beta glucosidase 27 (BGLU27); FUNCTIONS IN: cation binding, hydrolase activity, hydrolyzing O-glycosyl compounds, catalytic activity; INVOLVED IN: carbohydrate metabolic process; LOCATED IN: cellular_component unknown; EXPRESSED IN: stem, hypocotyl, sepal, stamen; EXPRESSED DURING: 4 anthesis; CONTAINS InterPro DOMAIN/s: Glycoside hydrolase, family 1 (InterPro:IPR001360), Glycoside hydrolase, fam…
XLOC_010854	XLOC_010854	AT2G07042	Chr2:2919936-2922249	WT	18	OK	2.26276	7.40572	1.71055	2.99907	5e-05	0.000622834	AT2G07042.1	other RNA
XLOC_009606	XLOC_009606	AT2G31940	Chr2:13580599-13581112	WT	18	OK	1.38899	4.54163	1.70917	3.08024	0.0055	0.0319313	AT2G31940.1	unknown protein; INVOLVED IN: biological_process unknown; LOCATED IN: endomembrane system; EXPRESSED IN: 16 plant structures; EXPRESSED DURING: 6 growth stages; BEST Arabidopsis thaliana protein match is: unknown protein (TAIR:AT5G19875.1); Has 227 Blast hits to 227 proteins in 13 species: Archae - 0; Bacteria - 0; Metazoa - 0; Fungi - 0; Plants - 227; Viruses - 0; Other Eukaryotes - 0 (source: N…
XLOC_011653	XLOC_011653	AT2G21900	Chr2:9332886-9336343	WT	18	OK	18.3862	60.1014	1.70877	4.47262	5e-05	0.000622834	AT2G21900.1	member of WRKY Transcription Factor; Group II-c
XLOC_010933	XLOC_010933	AT2G07731	Chr2:3467198-3468078	WT	18	OK	0.858397	2.80312	1.70732	2.87959	0.0023	0.0159824	AT2G07731.1	pseudogene, similar to NADH-ubiquinone oxidoreductase chain 6 (EC 1.6.5.3). (Field mustard), blastp match of 96% identity and 3.7e-99 P-value to SP|Q01825|NU6M_ARATH NADH-ubiquinone oxidoreductase chain 6 (EC 1.6.5.3). (Field mustard) {Brassica campestris}
XLOC_023085	XLOC_023085	AT4G19720	Chr4:10729956-10731935	WT	18	OK	14.1104	46.0772	1.70729	5.64106	5e-05	0.000622834	AT4G19720.1	Glycosyl hydrolase family protein with chitinase insertion domain; FUNCTIONS IN: cation binding, chitinase activity, hydrolase activity, hydrolyzing O-glycosyl compounds, catalytic activity; INVOLVED IN: carbohydrate metabolic process; LOCATED IN: cellular_component unknown; EXPRESSED IN: root; CONTAINS InterPro DOMAIN/s: Glycoside hydrolase, family 18, catalytic domain (InterPro:IPR001223), Chit…
XLOC_007429	XLOC_007429	AT1G72350	Chr1:27239129-27240357	WT	18	OK	2.96175	9.66403	1.70617	3.11502	5e-05	0.000622834	AT1G72350.1	MADS-box transcription factor family protein; FUNCTIONS IN: DNA binding, sequence-specific DNA binding transcription factor activity; INVOLVED IN: regulation of transcription, DNA-dependent; LOCATED IN: nucleus; CONTAINS InterPro DOMAIN/s: Transcription factor, MADS-box (InterPro:IPR002100); BEST Arabidopsis thaliana protein match is: MADS-box transcription factor family protein (TAIR:AT1G17310.1…
XLOC_010929	XLOC_010929	AT2G07815	Chr2:3441854-3445582	WT	18	OK	2.90053	9.45625	1.70495	2.04373	0.0001	0.00115693	AT2G07815.1	BEST Arabidopsis thaliana protein match is: cytochrome C biogenesis 452 (TAIR:ATMG00180.1); Has 30201 Blast hits to 17322 proteins in 780 species: Archae - 12; Bacteria - 1396; Metazoa - 17338; Fungi - 3422; Plants - 5037; Viruses - 0; Other Eukaryotes - 2996 (source: NCBI BLink).
XLOC_020681	XLOC_020681	AT4G19570	Chr4:10665293-10667318	WT	18	OK	0.411132	1.33681	1.70112	2.48063	0.0012	0.00948481	AT4G19570.1	Chaperone DnaJ-domain superfamily protein; FUNCTIONS IN: unfolded protein binding, heat shock protein binding; INVOLVED IN: protein folding; LOCATED IN: cellular_component unknown; CONTAINS InterPro DOMAIN/s: Molecular chaperone, heat shock protein, Hsp40, DnaJ (InterPro:IPR015609), Heat shock protein DnaJ, N-terminal (InterPro:IPR001623), Heat shock protein DnaJ (InterPro:IPR003095), Heat shock …
XLOC_027302	XLOC_027302	AT5G60250	Chr5:24252157-24254849	WT	18	OK	5.88542	18.9177	1.68452	5.75466	5e-05	0.000622834	AT5G60250.1	zinc finger (C3HC4-type RING finger) family protein; FUNCTIONS IN: zinc ion binding, nucleic acid binding; EXPRESSED IN: 14 plant structures; EXPRESSED DURING: 8 growth stages; CONTAINS InterPro DOMAIN/s: Zinc finger, RING-type, conserved site (InterPro:IPR017907), Zinc finger, C6HC-type (InterPro:IPR002867), Zinc finger, RING-type (InterPro:IPR001841), Polynucleotidyl transferase, ribonuclease H…
XLOC_025287	XLOC_025287	AT5G24640	Chr5:8436375-8436862	WT	18	OK	13.213	42.3941	1.68191	6.45032	5e-05	0.000622834	AT5G24640.1	unknown protein; BEST Arabidopsis thaliana protein match is: unknown protein (TAIR:AT2G41730.1); Has 1807 Blast hits to 1807 proteins in 277 species: Archae - 0; Bacteria - 0; Metazoa - 736; Fungi - 347; Plants - 385; Viruses - 0; Other Eukaryotes - 339 (source: NCBI BLink).
XLOC_016195	XLOC_016195	AT3G01490	Chr3:188337-193687	WT	18	OK	2.20213	7.05836	1.68043	3.31391	5e-05	0.000622834	AT3G01490.1	Protein kinase superfamily protein; FUNCTIONS IN: protein serine/threonine/tyrosine kinase activity, kinase activity; INVOLVED IN: protein amino acid phosphorylation; LOCATED IN: cellular_component unknown; EXPRESSED IN: 8 plant structures; EXPRESSED DURING: LP.06 six leaves visible, 4 anthesis, petal differentiation and expansion stage; CONTAINS InterPro DOMAIN/s: Protein kinase, catalytic domai…
XLOC_007135	XLOC_007135	AT1G66700	Chr1:24873290-24874758	WT	18	OK	4.67442	14.9745	1.67965	4.3959	5e-05	0.000622834	AT1G66700.1	A member of the Arabidopsis SABATH methyltransferase gene family. Encodes PXMT1, a methyltransferase that methylates 1,7-paraxanthine.
XLOC_012858	XLOC_012858	AT2G43570	Chr2:18076223-18077463	WT	18	OK	15.8997	50.7733	1.67507	6.46089	5e-05	0.000622834	AT2G43570.1	chitinase, putative (CHI); FUNCTIONS IN: chitin binding, chitinase activity; INVOLVED IN: carbohydrate metabolic process, cell wall macromolecule catabolic process; LOCATED IN: apoplast, plant-type cell wall; EXPRESSED IN: 15 plant structures; EXPRESSED DURING: 10 growth stages; CONTAINS InterPro DOMAIN/s: Chitin-binding, type 1, conserved site (InterPro:IPR018371), Glycoside hydrolase, family 19…
XLOC_008328	XLOC_008328	AT2G07741	Chr2:3502318-3503476	WT	18	OK	1.54662	4.93559	1.6741	3.72173	5e-05	0.000622834	AT2G07741.1	ATPase, F0 complex, subunit A protein; FUNCTIONS IN: hydrogen ion transmembrane transporter activity, hydrogen ion transporting ATP synthase activity, rotational mechanism; INVOLVED IN: proton transport, ATP synthesis coupled proton transport; LOCATED IN: proton-transporting ATP synthase complex, coupling factor F(o), membrane; CONTAINS InterPro DOMAIN/s: ATPase, F0 complex, subunit A (InterPro:I…
XLOC_016769	XLOC_016769	AT3G12230	Chr3:3899255-3901891	WT	18	OK	2.59439	8.2768	1.67368	3.90212	5e-05	0.000622834	AT3G12230.1	serine carboxypeptidase-like 14 (scpl14); FUNCTIONS IN: serine-type carboxypeptidase activity; INVOLVED IN: proteolysis; LOCATED IN: endomembrane system; CONTAINS InterPro DOMAIN/s: Peptidase S10, serine carboxypeptidase (InterPro:IPR001563); BEST Arabidopsis thaliana protein match is: serine carboxypeptidase-like 15 (TAIR:AT3G12240.1); Has 3660 Blast hits to 3566 proteins in 378 species: Archae …
XLOC_009968	XLOC_009968	AT2G38390	Chr2:16079680-16081509	WT	18	OK	86.1627	274.181	1.67	6.81509	5e-05	0.000622834	AT2G38390.1	Peroxidase superfamily protein; FUNCTIONS IN: peroxidase activity, heme binding; INVOLVED IN: response to salt stress; LOCATED IN: endomembrane system; EXPRESSED IN: root; CONTAINS InterPro DOMAIN/s: Haem peroxidase (InterPro:IPR010255), Plant peroxidase (InterPro:IPR000823), Peroxidases heam-ligand binding site (InterPro:IPR019793), Peroxidase, active site (InterPro:IPR019794), Haem peroxidase, …
XLOC_029692	XLOC_029692	AT5G39810	Chr5:15937277-15938344	WT	18	OK	0.514787	1.63051	1.66328	2.15595	0.0087	0.0453056	AT5G39810.1	AGAMOUS-like 98 (AGL98); FUNCTIONS IN: sequence-specific DNA binding transcription factor activity; INVOLVED IN: regulation of transcription, DNA-dependent; LOCATED IN: nucleus; CONTAINS InterPro DOMAIN/s: Transcription factor, MADS-box (InterPro:IPR002100); BEST Arabidopsis thaliana protein match is: AGAMOUS-like 81 (TAIR:AT5G39750.1); Has 502 Blast hits to 498 proteins in 43 species: Archae - 0…
XLOC_021490	XLOC_021490	AT4G34930	Chr4:16637321-16638872	WT	18	OK	1.06483	3.36812	1.66132	3.35497	5e-05	0.000622834	AT4G34930.1	PLC-like phosphodiesterases superfamily protein; FUNCTIONS IN: phospholipase C activity, phosphoric diester hydrolase activity; INVOLVED IN: intracellular signaling pathway, lipid metabolic process; CONTAINS InterPro DOMAIN/s: Phospholipase C, phosphatidylinositol-specific , X domain (InterPro:IPR000909), PLC-like phosphodiesterase, TIM beta/alpha-barrel domain (InterPro:IPR017946); BEST Arabidop…
XLOC_016058	XLOC_016058	AT3G61450	Chr3:22738352-22740096	WT	18	OK	0.878006	2.77096	1.65808	2.12864	0.0004	0.00385261	AT3G61450.2	syntaxin of plants 73 (SYP73)
XLOC_030909	XLOC_030909	AT5G62480	Chr5:25088693-25089620	WT	18	OK	27.479	86.36	1.65203	5.31369	5e-05	0.000622834	AT5G62480.1	Encodes glutathione transferase belonging to the tau class of GSTs. Naming convention according to Wagner et al. (2002).
XLOC_007461	XLOC_007461	AT1G73040,AT1G73050	Chr1:27473825-27478534	WT	18	OK	17.6389	55.4028	1.6512	2.18201	0.0046	0.0278301	AT1G73040.1	Mannose-binding lectin superfamily protein; CONTAINS InterPro DOMAIN/s: Mannose-binding lectin (InterPro:IPR001229); BEST Arabidopsis thaliana protein match is: Mannose-binding lectin superfamily protein (TAIR:AT1G19715.2); Has 1381 Blast hits to 855 proteins in 48 species: Archae - 0; Bacteria - 13; Metazoa - 1; Fungi - 0; Plants - 1366; Viruses - 0; Other Eukaryotes - 1 (source: NCBI BLink).
XLOC_012684	XLOC_012684	AT2G40340	Chr2:16848437-16850920	WT	18	OK	49.0459	153.848	1.6493	5.33418	5e-05	0.000622834	AT2G40340.1	Encodes a member of the DREB subfamily A-2 of ERF/AP2 transcription factor family. The protein contains one AP2 domain. There are eight members in this subfamily including DREB2A AND DREB2B that are involved in response to drought.
XLOC_030598	XLOC_030598	AT5G56370	Chr5:22835981-22837941	WT	18	OK	0.773056	2.42394	1.64871	2.60963	5e-05	0.000622834	AT5G56370.1	F-box/RNI-like/FBD-like domains-containing protein; CONTAINS InterPro DOMAIN/s: FBD (InterPro:IPR013596), F-box domain, cyclin-like (InterPro:IPR001810), F-box domain, Skp2-like (InterPro:IPR022364), FBD-like (InterPro:IPR006566), Leucine-rich repeat 2 (InterPro:IPR013101); BEST Arabidopsis thaliana protein match is: F-box/RNI-like/FBD-like domains-containing protein (TAIR:AT5G56420.2); Has 1807 …
XLOC_029828	XLOC_029828	AT5G42325	Chr5:16923170-16925034	WT	18	OK	2.08682	6.53235	1.64629	2.86428	5e-05	0.000622834	AT5G42325.1	Transcription factor IIS protein; FUNCTIONS IN: molecular_function unknown; INVOLVED IN: transcription; LOCATED IN: cellular_component unknown; CONTAINS InterPro DOMAIN/s: Transcription factor IIS, N-terminal (InterPro:IPR017923), Transcription elongation factor S-II, central domain (InterPro:IPR003618); BEST Arabidopsis thaliana protein match is: F-box family protein (TAIR:AT2G42730.1); Has 3020…
XLOC_002495	XLOC_002495	AT1G51913,AT1G51915	Chr1:19292908-19294034	WT	18	OK	2.30342	7.19863	1.64395	2.04005	0.00215	0.0151441	AT1G51913.1	LOCATED IN: endomembrane system; BEST Arabidopsis thaliana protein match is: cryptdin protein-related (TAIR:AT1G51915.1); Has 22 Blast hits to 22 proteins in 3 species: Archae - 0; Bacteria - 0; Metazoa - 0; Fungi - 0; Plants - 22; Viruses - 0; Other Eukaryotes - 0 (source: NCBI BLink).
XLOC_020424	XLOC_020424	AT4G15160	Chr4:8646149-8647252	WT	18	OK	6.60859	20.5826	1.63901	4.49001	5e-05	0.000622834	AT4G15160.1	Bifunctional inhibitor/lipid-transfer protein/seed storage 2S albumin superfamily protein; FUNCTIONS IN: lipid binding; INVOLVED IN: lipid transport; LOCATED IN: endomembrane system; EXPRESSED IN: 18 plant structures; EXPRESSED DURING: 9 growth stages; CONTAINS InterPro DOMAIN/s: Bifunctional inhibitor/plant lipid transfer protein/seed storage (InterPro:IPR016140), Plant lipid transfer protein/hy…
XLOC_028015	XLOC_028015	AT5G07650	Chr5:2410702-2421990	WT	18	OK	1.80033	5.58199	1.63252	2.29768	0.0002	0.00212981	AT5G07650.1	Actin-binding FH2 protein; FUNCTIONS IN: actin binding; INVOLVED IN: cellular component organization, actin cytoskeleton organization; LOCATED IN: chloroplast; CONTAINS InterPro DOMAIN/s: Actin-binding FH2/DRF autoregulatory (InterPro:IPR003104), Actin-binding FH2 (InterPro:IPR015425); BEST Arabidopsis thaliana protein match is: formin homology 2 domain-containing protein / FH2 domain-containing …
XLOC_001045	XLOC_001045	AT1G21230	Chr1:7429979-7432346	WT	18	OK	0.95058	2.94546	1.63161	3.48585	5e-05	0.000622834	AT1G21230.1	encodes a wall-associated kinase
XLOC_014253	XLOC_014253	AT3G23190	Chr3:8279288-8280912	WT	18	OK	29.9206	92.0018	1.62052	6.99796	5e-05	0.000622834	AT3G23190.1	HR-like lesion-inducing protein-related; FUNCTIONS IN: molecular_function unknown; INVOLVED IN: biological_process unknown; LOCATED IN: endoplasmic reticulum; EXPRESSED IN: hypocotyl, root, callus; CONTAINS InterPro DOMAIN/s: HR-like lesion-inducer (InterPro:IPR008637); BEST Arabidopsis thaliana protein match is: HR-like lesion-inducing protein-related (TAIR:AT3G23180.1); Has 132 Blast hits to 13…
XLOC_010943	XLOC_010943	AT2G07739	Chr2:3495441-3496110	WT	18	OK	9.20422	28.2495	1.61786	4.22287	5e-05	0.000622834	AT2G07739.1	Ycf1 protein; FUNCTIONS IN: molecular_function unknown; INVOLVED IN: biological_process unknown; LOCATED IN: endomembrane system; CONTAINS InterPro DOMAIN/s: Ycf1 (InterPro:IPR008896); BEST Arabidopsis thaliana protein match is: Ycf1 protein (TAIR:ATMG00370.1); Has 1145 Blast hits to 1145 proteins in 726 species: Archae - 0; Bacteria - 0; Metazoa - 0; Fungi - 0; Plants - 1145; Viruses - 0; Other …
XLOC_020484	XLOC_020484	AT4G16008	Chr4:9067829-9072903	WT	18	OK	9.37922	28.6936	1.61319	5.9456	5e-05	0.000622834	AT4G16008.1	unknown protein; FUNCTIONS IN: molecular_function unknown; INVOLVED IN: biological_process unknown; LOCATED IN: cellular_component unknown; Has 30201 Blast hits to 17322 proteins in 780 species: Archae - 12; Bacteria - 1396; Metazoa - 17338; Fungi - 3422; Plants - 5037; Viruses - 0; Other Eukaryotes - 2996 (source: NCBI BLink).
XLOC_027371	XLOC_027371	AT5G61700,AT5G61740	Chr5:24793863-24812736	WT	18	OK	2.01742	6.16129	1.61072	3.93383	5e-05	0.000622834	AT5G61700.1	member of ATH subfamily
XLOC_007714	XLOC_007714	AT1G77990	Chr1:29317898-29323358	WT	18	OK	0.788564	2.40686	1.60986	3.20082	0.0001	0.00115693	AT1G77990.1	cDNA encoding a sulfate transporter.
XLOC_011889	XLOC_011889	AT2G26160	Chr2:11137977-11139451	WT	18	OK	0.432675	1.31645	1.60529	2.33014	0.0047	0.0283471	AT2G26160.1	F-box family protein with a domain of unknown function (DUF295); CONTAINS InterPro DOMAIN/s: Protein of unknown function DUF295 (InterPro:IPR005174); BEST Arabidopsis thaliana protein match is: F-box family protein with a domain of unknown function (DUF295) (TAIR:AT3G25750.1); Has 338 Blast hits to 337 proteins in 11 species: Archae - 0; Bacteria - 0; Metazoa - 0; Fungi - 0; Plants - 338; Viruses…
XLOC_017516	XLOC_017516	AT3G26220	Chr3:9596076-9597833	WT	18	OK	1.34397	4.08186	1.60273	3.37818	5e-05	0.000622834	AT3G26220.1	cytochrome P450 monooxygenase
XLOC_012512	XLOC_012512	AT2G37240	Chr2:15639938-15641763	WT	18	OK	4.57909	13.8925	1.60117	4.67057	5e-05	0.000622834	AT2G37240.1	Thioredoxin superfamily protein; FUNCTIONS IN: oxidoreductase activity, antioxidant activity; INVOLVED IN: biological_process unknown; LOCATED IN: chloroplast; EXPRESSED IN: 21 plant structures; EXPRESSED DURING: 14 growth stages; CONTAINS InterPro DOMAIN/s: Thioredoxin fold (InterPro:IPR012335), Alkyl hydroperoxide reductase/ Thiol specific antioxidant/ Mal allergen (InterPro:IPR000866), Thiored…
XLOC_019700	XLOC_019700	AT4G05018	Chr4:2571412-2572177	WT	18	OK	1.88844	5.71895	1.59855	3.35451	0.0002	0.00212981	AT4G05018.1	unknown protein; FUNCTIONS IN: molecular_function unknown; INVOLVED IN: biological_process unknown; LOCATED IN: endomembrane system; BEST Arabidopsis thaliana protein match is: unknown protein (TAIR:AT4G21500.1); Has 30201 Blast hits to 17322 proteins in 780 species: Archae - 12; Bacteria - 1396; Metazoa - 17338; Fungi - 3422; Plants - 5037; Viruses - 0; Other Eukaryotes - 2996 (source: NCBI BLin…
XLOC_016604	XLOC_016604	AT3G09220	Chr3:2827238-2830542	WT	18	OK	0.558938	1.68599	1.59283	2.85295	0.00065	0.00575485	AT3G09220.1	putative laccase, a member of laccase family of genes (17 members in Arabidopsis).
XLOC_020010	XLOC_020010	AT4G08555	Chr4:5448132-5448523	WT	18	OK	48.688	146.69	1.59113	8.49915	5e-05	0.000622834	AT4G08555.1	unknown protein; FUNCTIONS IN: molecular_function unknown; INVOLVED IN: biological_process unknown; LOCATED IN: cellular_component unknown; EXPRESSED IN: cultured cell; Has 4 Blast hits to 4 proteins in 2 species: Archae - 0; Bacteria - 0; Metazoa - 0; Fungi - 0; Plants - 4; Viruses - 0; Other Eukaryotes - 0 (source: NCBI BLink).
XLOC_019637	XLOC_019637	AT4G04220	Chr4:2033236-2036388	WT	18	OK	2.6677	8.03197	1.59016	4.48406	5e-05	0.000622834	AT4G04220.1	receptor like protein 46 (RLP46); FUNCTIONS IN: kinase activity; INVOLVED IN: signal transduction, defense response; LOCATED IN: endomembrane system; EXPRESSED IN: 20 plant structures; EXPRESSED DURING: 11 growth stages; CONTAINS InterPro DOMAIN/s: Leucine-rich repeat, typical subtype (InterPro:IPR003591), Leucine-rich repeat-containing N-terminal domain, type 2 (InterPro:IPR013210), Leucine-rich…
XLOC_027649	XLOC_027649	AT5G66980	Chr5:26741562-26742826	WT	18	OK	1.75095	5.25816	1.58642	3.34913	5e-05	0.000622834	AT5G66980.1	AP2/B3-like transcriptional factor family protein; FUNCTIONS IN: DNA binding, sequence-specific DNA binding transcription factor activity; INVOLVED IN: regulation of transcription, DNA-dependent; LOCATED IN: endomembrane system; EXPRESSED IN: sperm cell, root, flower, egg cell; EXPRESSED DURING: 4 anthesis; CONTAINS InterPro DOMAIN/s: Transcriptional factor B3 (InterPro:IPR003340); BEST Arabidops…
XLOC_012477	XLOC_012477	AT2G36724	Chr2:15401373-15403537	WT	18	OK	7.21583	21.6289	1.58372	3.14941	5e-05	0.000622834	AT2G36724.1	unknown protein; FUNCTIONS IN: molecular_function unknown; INVOLVED IN: biological_process unknown; LOCATED IN: endomembrane system; BEST Arabidopsis thaliana protein match is: unknown protein (TAIR:AT2G26865.1); Has 35333 Blast hits to 34131 proteins in 2444 species: Archae - 798; Bacteria - 22429; Metazoa - 974; Fungi - 991; Plants - 531; Viruses - 0; Other Eukaryotes - 9610 (source: NCBI BLink…
XLOC_003921	XLOC_003921	AT1G79320	Chr1:29836685-29837908	WT	18	OK	0.510516	1.52285	1.57674	2.057	0.005	0.0296768	AT1G79320.1	Encodes a putative metacaspase. Arabidopsis contains three type I MCP genes (MCP1a-c) and six type II MCP genes (MCP2a?f): AtMCP1a/At5g64240, AtMCP1b/At1g02170, AtMCP1c/At4g25110, AtMCP2a/At1g79310, AtMCP2b/At1g79330, AtMCP2c/At1g79320, AtMCP2d/At1g79340, AtMCP2e/At1g16420, AtMCP2f/At5g04200.
XLOC_009640	XLOC_009640	AT2G32487	Chr2:13791886-13793177	WT	18	OK	2.32643	6.93646	1.57608	3.46004	0.0009	0.00748109	AT2G32487.1	unknown protein; FUNCTIONS IN: molecular_function unknown; INVOLVED IN: biological_process unknown; LOCATED IN: endomembrane system; Has 1 Blast hits to 1 proteins in 1 species: Archae - 0; Bacteria - 0; Metazoa - 0; Fungi - 0; Plants - 1; Viruses - 0; Other Eukaryotes - 0 (source: NCBI BLink).
XLOC_001579	XLOC_001579	AT1G31320	Chr1:11213016-11214382	WT	18	OK	3.90183	11.5487	1.5655	4.35743	5e-05	0.000622834	AT1G31320.1	LOB domain-containing protein 4 (LBD4); CONTAINS InterPro DOMAIN/s: Lateral organ boundaries, LOB (InterPro:IPR004883); BEST Arabidopsis thaliana protein match is: ASYMMETRIC LEAVES 2-like 9 (TAIR:AT1G16530.1); Has 1039 Blast hits to 1034 proteins in 25 species: Archae - 0; Bacteria - 0; Metazoa - 0; Fungi - 0; Plants - 1039; Viruses - 0; Other Eukaryotes - 0 (source: NCBI BLink).
XLOC_030554	XLOC_030554	AT5G55490	Chr5:22474173-22481930	WT	18	OK	4.64466	13.7397	1.56471	1.96419	0.0017	0.0125016	AT5G55490.1	Encodes a transmembrane domain containing protein that is expressed in pollen germ cells.
XLOC_029614	XLOC_029614	AT5G38540	Chr5:15426610-15430787	WT	18	OK	0.513747	1.51871	1.56372	2.20184	0.0004	0.00385261	AT5G38540.1	Mannose-binding lectin superfamily protein; FUNCTIONS IN: molecular_function unknown; INVOLVED IN: biological_process unknown; LOCATED IN: endomembrane system; CONTAINS InterPro DOMAIN/s: Mannose-binding lectin (InterPro:IPR001229); BEST Arabidopsis thaliana protein match is: Mannose-binding lectin superfamily protein (TAIR:AT5G38550.1); Has 1807 Blast hits to 1807 proteins in 277 species: Archae…
XLOC_001101	XLOC_001101	AT1G22150	Chr1:7817959-7821572	WT	18	OK	0.6161	1.82025	1.5629	2.63307	0.00015	0.00165462	AT1G22150.1	sulfate transporter Sultr1;3
XLOC_003169	XLOC_003169	AT1G64660	Chr1:24028917-24030780	WT	18	OK	26.0429	76.8906	1.56192	5.95922	5e-05	0.000622834	AT1G64660.1	Encodes a functional methionine gamma-lyase, a cytosolic enzyme catalyzes the degradation of methionine into methanethiol, alpha-ketobutyrate and ammonia. The catabolism of excess methionine is important to methionine homeostasis.
XLOC_030991	XLOC_030991	AT5G64100	Chr5:25650640-25652123	WT	18	OK	119.414	352.303	1.56085	5.96142	5e-05	0.000622834	AT5G64100.1	Peroxidase superfamily protein; FUNCTIONS IN: peroxidase activity, heme binding; INVOLVED IN: oxidation reduction, response to oxidative stress; LOCATED IN: cell wall; EXPRESSED IN: hypocotyl, root, callus; EXPRESSED DURING: seedling growth; CONTAINS InterPro DOMAIN/s: Haem peroxidase (InterPro:IPR010255), Plant peroxidase (InterPro:IPR000823), Peroxidases heam-ligand binding site (InterPro:IPR01…
XLOC_004057	XLOC_004057	AT1G02230	Chr1:435173-436776	WT	18	OK	3.66967	10.82	1.55997	4.19134	5e-05	0.000622834	AT1G02230.1	NAC domain containing protein 4 (NAC004); FUNCTIONS IN: sequence-specific DNA binding transcription factor activity; INVOLVED IN: multicellular organismal development, regulation of transcription; LOCATED IN: cellular_component unknown; CONTAINS InterPro DOMAIN/s: No apical meristem (NAM) protein (InterPro:IPR003441); BEST Arabidopsis thaliana protein match is: NAC domain containing protein 5 (TA…
XLOC_015865	XLOC_015865	AT3G57645	Chr3:21346341-21347860	WT	18	OK	0.68511	2.01245	1.55455	1.60813	0.00735	0.0399478	AT3G57645.1	U2.2; snRNA; gi|17661|emb|X06473.1|ATU22 Arabidopsis thaliana U2 RNA gene (U2.2)
XLOC_010603	XLOC_010603	AT2G02950	Chr2:853872-856572	WT	18	OK	0.617812	1.81377	1.55375	2.349	0.00045	0.00422513	AT2G02950.1	Encodes a basic soluble protein which can independently bind to either PHYA or PHYB, regardless of whether the phytochromes are in the Pr or Pfr state. PKS1 can be phosphorylated by oat phyA in vitro in a light regulated manner. It is postulated to be a negative regulator of phyB signalling.
XLOC_008690	XLOC_008690	AT2G15220	Chr2:6608658-6609506	WT	18	OK	11.3798	33.3724	1.55218	5.45172	5e-05	0.000622834	AT2G15220.1	Plant basic secretory protein (BSP) family protein; INVOLVED IN: defense response; LOCATED IN: endomembrane system; EXPRESSED DURING: seedling growth; CONTAINS InterPro DOMAIN/s: Uncharacterised protein family, basic secretory protein (InterPro:IPR007541); BEST Arabidopsis thaliana protein match is: Plant basic secretory protein (BSP) family protein (TAIR:AT2G15130.1); Has 296 Blast hits to 296 p…
XLOC_008315	XLOC_008315	AT2G07722	Chr2:3438741-3439161	WT	18	OK	4.40192	12.9024	1.55143	4.37589	0.0005	0.00460825	AT2G07722.1	unknown protein; BEST Arabidopsis thaliana protein match is: unknown protein (TAIR:ATMG00620.1); Has 15 Blast hits to 15 proteins in 5 species: Archae - 0; Bacteria - 0; Metazoa - 0; Fungi - 0; Plants - 15; Viruses - 0; Other Eukaryotes - 0 (source: NCBI BLink).
XLOC_026055	XLOC_026055	AT5G38200	Chr5:15256275-15258755	WT	18	OK	10.6069	30.6611	1.53141	5.61161	5e-05	0.000622834	AT5G38200.1	Class I glutamine amidotransferase-like superfamily protein; FUNCTIONS IN: hydrolase activity; INVOLVED IN: glutamine metabolic process; LOCATED IN: cellular_component unknown; CONTAINS InterPro DOMAIN/s: Peptidase C26 (InterPro:IPR011697), Glutamine amidotransferase type 1 (InterPro:IPR017926); BEST Arabidopsis thaliana protein match is: Class I glutamine amidotransferase-like superfamily protei…
XLOC_012482	XLOC_012482	AT2G36780	Chr2:15417489-15419154	WT	18	OK	0.579627	1.67533	1.53125	2.43805	0.00045	0.00422513	AT2G36780.1	UDP-Glycosyltransferase superfamily protein; FUNCTIONS IN: UDP-glycosyltransferase activity, transferase activity, transferring glycosyl groups; INVOLVED IN: metabolic process; LOCATED IN: cellular_component unknown; CONTAINS InterPro DOMAIN/s: UDP-glucuronosyl/UDP-glucosyltransferase (InterPro:IPR002213); BEST Arabidopsis thaliana protein match is: UDP-Glycosyltransferase superfamily protein (TA…
XLOC_001143	XLOC_001143	AT1G22990	Chr1:8139164-8140202	WT	18	OK	28.4342	82.1426	1.5305	6.36643	5e-05	0.000622834	AT1G22990.1	Heavy metal transport/detoxification superfamily protein ; FUNCTIONS IN: metal ion binding; INVOLVED IN: metal ion transport; LOCATED IN: cellular_component unknown; EXPRESSED IN: 9 plant structures; EXPRESSED DURING: LP.04 four leaves visible, 4 anthesis, C globular stage; CONTAINS InterPro DOMAIN/s: Heavy metal transport/detoxification protein (InterPro:IPR006121); BEST Arabidopsis thaliana pro…
XLOC_005055	XLOC_005055	AT1G21260.1	Chr1:7442217-7442979	WT	18	OK	1.01777	2.93779	1.52931	2.48641	0.00355	0.0226166	AT1G21260.1	transposable element gene; copia-like retrotransposon family, has a 2.4e-23 P-value blast match to GB:CAA72989 open reading frame 1 (Ty1_Copia-element) (Brassica oleracea)
XLOC_006275	XLOC_006275	AT1G50090	Chr1:18554640-18556794	WT	18	OK	5.80071	16.6743	1.52333	4.80011	5e-05	0.000622834	AT1G50090.1	D-aminoacid aminotransferase-like PLP-dependent enzymes superfamily protein; FUNCTIONS IN: branched-chain-amino-acid transaminase activity, catalytic activity; INVOLVED IN: branched chain family amino acid metabolic process, metabolic process; LOCATED IN: cellular_component unknown; EXPRESSED IN: root; CONTAINS InterPro DOMAIN/s: Aminotransferase, class IV (InterPro:IPR001544), Aminotransferase, …
XLOC_013849	XLOC_013849	AT3G16360	Chr3:5554257-5555603	WT	18	OK	16.4031	47.1258	1.52255	4.14553	5e-05	0.000622834	AT3G16360.2	Encodes AHP4, a histidine-containing phosphotransmitter involved in Histidine (His)-to-Aspartate (Asp) phosphorelay signal transduction. AHP4 is one of the six Arabidopsis thaliana histidine phosphotransfer proteins (AHPs). AHPs function as redundant positive regulators of cytokinin signaling. Members of the AHP gene family include: AT3G21510 (AHP1), AT3G29350 (AHP2), AT5G39340 (AHP3), AT3G16360 …
XLOC_010917	XLOC_010917	AT2G07599,AT2G07696	Chr2:3348002-3353014	WT	18	OK	1.8852	5.40878	1.52059	2.17461	0.0003	0.0030153	AT2G07599.2	unknown protein; BEST Arabidopsis thaliana protein match is: unknown protein (TAIR:ATMG01040.1).
XLOC_024077	XLOC_024077	AT4G38780,AT4G38781	Chr4:18101295-18111193	WT	18	OK	5.08793	14.5758	1.51843	4.32952	5e-05	0.000622834	AT4G38780.1	Pre-mRNA-processing-splicing factor; FUNCTIONS IN: molecular_function unknown; INVOLVED IN: nuclear mRNA splicing, via spliceosome; LOCATED IN: spliceosomal complex; EXPRESSED IN: 19 plant structures; EXPRESSED DURING: 8 growth stages; CONTAINS InterPro DOMAIN/s: Mov34/MPN/PAD-1 (InterPro:IPR000555), Pre-mRNA-processing-splicing factor 8, U5-snRNA-binding (InterPro:IPR019581), Pre-mRNA-processing…
XLOC_010935	XLOC_010935	AT2G07733	Chr2:3470314-3471873	WT	18	OK	1.20552	3.44805	1.51612	3.10129	0.0001	0.00115693	AT2G07733.1	pseudogene, similar to NADH dehydrogenase subunit 2, blastp match of 94% identity and 2.0e-77 P-value to GP|1667390|gb|AAB18755.1||M81726 NADH dehydrogenase subunit 2 {Oenothera berteriana}
XLOC_003298	XLOC_003298	AT1G67105	Chr1:25057478-25058264	WT	18	OK	196.163	560.953	1.51582	6.74176	5e-05	0.000622834	AT1G67105.1	other RNA
XLOC_005683	XLOC_005683	AT1G33890	Chr1:12307697-12309920	WT	18	OK	0.694617	1.98467	1.51461	1.73769	0.0022	0.0154343	AT1G33890.1	Avirulence induced gene (AIG1) family protein; FUNCTIONS IN: GTP binding; INVOLVED IN: response to bacterium; LOCATED IN: cellular_component unknown; EXPRESSED IN: pedicel; EXPRESSED DURING: 4 anthesis; CONTAINS InterPro DOMAIN/s: AIG1 (InterPro:IPR006703); BEST Arabidopsis thaliana protein match is: P-loop containing nucleoside triphosphate hydrolases superfamily protein (TAIR:AT1G33900.1); Has …
XLOC_008320	XLOC_008320	AT2G07787,AT2G07827	Chr2:3472304-3480000	WT	18	OK	1.82951	5.22274	1.51335	2.2363	0.0004	0.00385261	AT2G07787.1	unknown protein; Has 35333 Blast hits to 34131 proteins in 2444 species: Archae - 798; Bacteria - 22429; Metazoa - 974; Fungi - 991; Plants - 531; Viruses - 0; Other Eukaryotes - 9610 (source: NCBI BLink).
XLOC_024821	XLOC_024821	AT5G14760	Chr5:4768467-4775826	WT	18	OK	7.71792	22.022	1.51266	4.38313	5e-05	0.000622834	AT5G14760.1	At5g14760 encodes for L-aspartate oxidase involved in the early steps of NAD biosynthesis. In contrary to the EC 1.4.3.16 (l-aspartate oxidase - deaminating) the enzyme catalyzes the reaction L-aspartate + O2 = iminoaspartate (alpha-iminosuccinate) + H2O2
XLOC_028937	XLOC_028937	AT5G26170	Chr5:9142864-9148464	WT	18	OK	6.57173	18.7193	1.51018	2.1506	0.0014	0.0107085	AT5G26170.1	member of WRKY Transcription Factor; Group II-c. Involved in jasmonic acid inducible defense responses.
XLOC_012042	XLOC_012042	AT2G28850	Chr2:12383479-12384961	WT	18	OK	1.88316	5.34968	1.5063	3.70541	5e-05	0.000622834	AT2G28850.1	member of CYP710A
XLOC_003300	XLOC_003300	AT1G67148	Chr1:25121234-25121898	WT	18	OK	52.3395	148.525	1.50473	7.84819	5e-05	0.000622834	AT1G67148.1	unknown protein; Has 1 Blast hits to 1 proteins in 1 species: Archae - 0; Bacteria - 0; Metazoa - 0; Fungi - 0; Plants - 1; Viruses - 0; Other Eukaryotes - 0 (source: NCBI BLink).
XLOC_017605	XLOC_017605	AT3G27473	Chr3:10169058-10172022	WT	18	OK	1.65332	4.68967	1.50412	3.46752	5e-05	0.000622834	AT3G27473.1	Cysteine/Histidine-rich C1 domain family protein; FUNCTIONS IN: zinc ion binding; INVOLVED IN: intracellular signaling pathway; EXPRESSED IN: stem, sperm cell, root; CONTAINS InterPro DOMAIN/s: Protein kinase C-like, phorbol ester/diacylglycerol binding (InterPro:IPR002219), DC1 (InterPro:IPR004146), Zinc finger, PHD-type (InterPro:IPR001965), C1-like (InterPro:IPR011424); BEST Arabidopsis thalia…
XLOC_014256	XLOC_014256	AT3G23240	Chr3:8295643-8296604	WT	18	OK	2.26645	6.41059	1.50002	3.45726	0.0001	0.00115693	AT3G23240.1	encodes a member of the ERF (ethylene response factor) subfamily B-3 of ERF/AP2 transcription factor family (ERF1). The protein contains one AP2 domain. There are 18 members in this subfamily including ATERF-1, ATERF-2, AND ATERF-5. EREBP like protein that binds GCC box of ethylene regulated promoters such as basic chitinases. Constitutive expression of ERF1 phenocopies ethylene over production. …
XLOC_010640	XLOC_010640	AT2G03760	Chr2:1149336-1150663	WT	18	OK	31.123	87.7038	1.49466	6.07698	5e-05	0.000622834	AT2G03760.1	Encodes a brassinosteroid sulfotransferase. In vitro experiements show that this enzyme has a preference for 24-epibrassinosteroids, particularly 24-epicathasterone, but does not act on castasterone and brassinolide. It is differentially expressed during development, being more abundant in young seedlings and actively growing cell cultures. Expression is induced in response to salicylic acid and …
XLOC_017515	XLOC_017515	AT3G26210	Chr3:9593131-9595243	WT	18	OK	1.51256	4.26028	1.49395	3.35415	5e-05	0.000622834	AT3G26210.1	putative cytochrome P450
XLOC_007190	XLOC_007190	AT1G67520	Chr1:25302663-25306333	WT	18	OK	2.3527	6.62196	1.49294	3.94766	5e-05	0.000622834	AT1G67520.1	lectin protein kinase family protein; FUNCTIONS IN: in 6 functions; INVOLVED IN: protein amino acid phosphorylation; LOCATED IN: endomembrane system; CONTAINS InterPro DOMAIN/s: Curculin-like (mannose-binding) lectin (InterPro:IPR001480), PAN-2 domain (InterPro:IPR013227), Apple-like (InterPro:IPR003609), Serine/threonine-protein kinase domain (InterPro:IPR002290), Serine/threonine-protein kinase…
XLOC_015997	XLOC_015997	AT3G60470	Chr3:22344812-22347121	WT	18	OK	1.10234	3.10104	1.49218	3.12407	5e-05	0.000622834	AT3G60470.1	Plant protein of unknown function (DUF247); CONTAINS InterPro DOMAIN/s: Protein of unknown function DUF247, plant (InterPro:IPR004158); BEST Arabidopsis thaliana protein match is: Plant protein of unknown function (DUF247) (TAIR:AT2G28580.1); Has 1401 Blast hits to 907 proteins in 17 species: Archae - 0; Bacteria - 0; Metazoa - 0; Fungi - 0; Plants - 1401; Viruses - 0; Other Eukaryotes - 0 (sourc…
XLOC_015787	XLOC_015787	AT3G55890,AT3G55910	Chr3:20740735-20747027	WT	18	OK	6.49262	18.1794	1.48543	3.13037	5e-05	0.000622834	AT3G55890.1	Yippee family putative zinc-binding protein; CONTAINS InterPro DOMAIN/s: Yippee-like protein (InterPro:IPR004910); BEST Arabidopsis thaliana protein match is: Yippee family putative zinc-binding protein (TAIR:AT2G40110.1); Has 985 Blast hits to 985 proteins in 210 species: Archae - 0; Bacteria - 0; Metazoa - 467; Fungi - 205; Plants - 238; Viruses - 0; Other Eukaryotes - 75 (source: NCBI BLink).
XLOC_024429	XLOC_024429	AT5G05900	Chr5:1774512-1776381	WT	18	OK	1.13937	3.18972	1.48519	2.93176	0.0003	0.0030153	AT5G05900.1	UDP-Glycosyltransferase superfamily protein; FUNCTIONS IN: UDP-glycosyltransferase activity, transferase activity, transferring glycosyl groups; INVOLVED IN: metabolic process; LOCATED IN: cellular_component unknown; EXPRESSED IN: root; CONTAINS InterPro DOMAIN/s: UDP-glucuronosyl/UDP-glucosyltransferase (InterPro:IPR002213); BEST Arabidopsis thaliana protein match is: UDP-Glycosyltransferase sup…
XLOC_021873	XLOC_021873	AT4G01970	Chr4:853921-857369	WT	18	OK	1.37715	3.83633	1.47804	3.50003	5e-05	0.000622834	AT4G01970.1	Encodes a putative stachyose synthetase or raffinose synthase.
XLOC_010909	XLOC_010909	AT2G07687	Chr2:3311653-3312651	WT	18	OK	1.47973	4.12084	1.4776	3.06778	0.00045	0.00422513	AT2G07687.1	Cytochrome c oxidase, subunit III; FUNCTIONS IN: cytochrome-c oxidase activity; INVOLVED IN: mitochondrial electron transport, cytochrome c to oxygen; LOCATED IN: membrane; CONTAINS InterPro DOMAIN/s: Cytochrome c oxidase, subunit III (InterPro:IPR000298); BEST Arabidopsis thaliana protein match is: cytochrome c oxidase subunit 3 (TAIR:ATMG00730.1); Has 29038 Blast hits to 29025 proteins in 5946 …
XLOC_010333	XLOC_010333	AT2G45130,AT2G45135	Chr2:18606301-18610574	WT	18	OK	1.49675	4.16275	1.4757	2.43455	0.0003	0.0030153	AT2G45130.1	Expression is upregulated in the shoot of cax1/cax3 mutant.
XLOC_005834	XLOC_005834	AT1G36622	Chr1:13832105-13836954	WT	18	OK	5.86735	16.2874	1.47298	2.92164	5e-05	0.000622834	AT1G36622.1	unknown protein; LOCATED IN: endomembrane system; BEST Arabidopsis thaliana protein match is: unknown protein (TAIR:AT1G36640.1); Has 12 Blast hits to 12 proteins in 2 species: Archae - 0; Bacteria - 0; Metazoa - 0; Fungi - 0; Plants - 12; Viruses - 0; Other Eukaryotes - 0 (source: NCBI BLink).
XLOC_026117	XLOC_026117	AT5G39090	Chr5:15643602-15645116	WT	18	OK	0.462666	1.28223	1.47062	2.14626	0.00635	0.0356849	AT5G39090.1	HXXXD-type acyl-transferase family protein; FUNCTIONS IN: transferase activity, transferring acyl groups other than amino-acyl groups, transferase activity; INVOLVED IN: biological_process unknown; EXPRESSED IN: 12 plant structures; EXPRESSED DURING: 6 growth stages; CONTAINS InterPro DOMAIN/s: Transferase (InterPro:IPR003480); BEST Arabidopsis thaliana protein match is: HXXXD-type acyl-transfera…
XLOC_006479	XLOC_006479	AT1G53633	Chr1:20016220-20017941	WT	18	OK	4.02403	11.1005	1.46391	2.1282	0.00265	0.0179038	AT1G53633.1	unknown protein; FUNCTIONS IN: molecular_function unknown; INVOLVED IN: biological_process unknown; LOCATED IN: cellular_component unknown; Has 5 Blast hits to 5 proteins in 2 species: Archae - 0; Bacteria - 0; Metazoa - 2; Fungi - 0; Plants - 3; Viruses - 0; Other Eukaryotes - 0 (source: NCBI BLink).
XLOC_004349	XLOC_004349	AT1G07620	Chr1:2344389-2346864	WT	18	OK	4.33831	11.9497	1.46178	4.10225	5e-05	0.000622834	AT1G07620.1	ATOBGM; FUNCTIONS IN: magnesium ion binding, GTP binding, GTPase activity; INVOLVED IN: biological_process unknown; LOCATED IN: cellular_component unknown; CONTAINS InterPro DOMAIN/s: GTP-binding protein Obg/CgtA (InterPro:IPR014100); BEST Arabidopsis thaliana protein match is: Protein of unknown function (DUF3741) (TAIR:AT5G02390.1); Has 561 Blast hits to 511 proteins in 87 species: Archae - 0; …
XLOC_004794	XLOC_004794	AT1G15770,AT1G15772	Chr1:5425296-5429594	WT	18	OK	3.96689	10.8526	1.45196	1.90979	0.00045	0.00422513	AT1G15770.1	unknown protein; BEST Arabidopsis thaliana protein match is: unknown protein (TAIR:AT1G15780.1); Has 30201 Blast hits to 17322 proteins in 780 species: Archae - 12; Bacteria - 1396; Metazoa - 17338; Fungi - 3422; Plants - 5037; Viruses - 0; Other Eukaryotes - 2996 (source: NCBI BLink).
XLOC_010936	XLOC_010936	AT2G07734	Chr2:3472304-3480000	WT	18	OK	4.5576	12.4432	1.44901	3.64637	5e-05	0.000622834	AT2G07734.1	Alpha-L RNA-binding motif/Ribosomal protein S4 family protein; FUNCTIONS IN: structural constituent of ribosome, RNA binding; INVOLVED IN: translation; LOCATED IN: small ribosomal subunit; CONTAINS InterPro DOMAIN/s: RNA-binding S4 (InterPro:IPR002942); BEST Arabidopsis thaliana protein match is: mitochondrial ribosomal protein S4 (TAIR:ATMG00290.1); Has 1839 Blast hits to 1839 proteins in 823 sp…
XLOC_027098	XLOC_027098	AT5G56200	Chr5:22747767-22749249	WT	18	OK	1.1088	3.01774	1.44448	2.867	0.00015	0.00165462	AT5G56200.1	Encodes a transcription factor expressed in the female gametophyte.
XLOC_017088	XLOC_017088	AT3G18250	Chr3:6255741-6258417	WT	18	OK	20.6607	56.215	1.44407	2.00584	0.00595	0.0339593	AT3G18250.1	Putative membrane lipoprotein; Has 25 Blast hits to 25 proteins in 10 species: Archae - 0; Bacteria - 2; Metazoa - 2; Fungi - 1; Plants - 18; Viruses - 0; Other Eukaryotes - 2 (source: NCBI BLink).
XLOC_012635	XLOC_012635	AT2G39530	Chr2:16498485-16499471	WT	18	OK	42.1042	114.448	1.44265	7.08311	5e-05	0.000622834	AT2G39530.1	Uncharacterised protein family (UPF0497); CONTAINS InterPro DOMAIN/s: Uncharacterised protein family UPF0497, trans-membrane plant (InterPro:IPR006702), Uncharacterised protein family UPF0497, trans-membrane plant subgroup (InterPro:IPR006459); BEST Arabidopsis thaliana protein match is: Uncharacterised protein family (UPF0497) (TAIR:AT2G39518.1); Has 200 Blast hits to 200 proteins in 15 species:…
XLOC_002255	XLOC_002255	AT1G47600	Chr1:17491731-17494759	WT	18	OK	2.73174	7.40734	1.43914	3.40686	5e-05	0.000622834	AT1G47600.1	Encodes a myrosinase. Over-expression led to a glucosinolate profile change.
XLOC_011655	XLOC_011655	AT2G21930	Chr2:9347268-9349232	WT	18	OK	1.36863	3.70226	1.43567	2.48629	0.00015	0.00165462	AT2G21930.1	A paternally expressed imprinted gene.
XLOC_021659	XLOC_021659	AT4G38340	Chr4:17954709-17958072	WT	18	OK	2.74304	7.39796	1.43135	3.989	5e-05	0.000622834	AT4G38340.1	Plant regulator RWP-RK family protein; CONTAINS InterPro DOMAIN/s: Octicosapeptide/Phox/Bem1p (InterPro:IPR000270), Plant regulator RWP-RK (InterPro:IPR003035), GAF (InterPro:IPR003018); BEST Arabidopsis thaliana protein match is: Plant regulator RWP-RK family protein (TAIR:AT1G76350.1); Has 720 Blast hits to 573 proteins in 47 species: Archae - 0; Bacteria - 4; Metazoa - 0; Fungi - 7; Plants - 6…
XLOC_004939	XLOC_004939	AT1G18970	Chr1:6554567-6555377	WT	18	OK	55.288	148.91	1.4294	6.48782	5e-05	0.000622834	AT1G18970.1	Encodes a germin-like protein with possible oxalate oxidase activity (based on GenBank record).
XLOC_020437	XLOC_020437	AT4G15380	Chr4:8788738-8790444	WT	18	OK	1.73102	4.66115	1.42906	3.28355	5e-05	0.000622834	AT4G15380.1	member of CYP705A
XLOC_004377	XLOC_004377	AT1G08100	Chr1:2527169-2529120	WT	18	OK	0.799926	2.15186	1.42764	2.57496	0.0006	0.00536361	AT1G08100.1	Encodes a high-affinity nitrate transporter.
XLOC_012484	XLOC_012484	AT2G36800	Chr2:15423379-15425016	WT	18	OK	3.37279	9.05399	1.42461	3.97283	5e-05	0.000622834	AT2G36800.1	Encodes a DON-Glucosyltransferase. The UGT73C5 glucosylates both brassinolide and castasterone in the 23-O position. The enzyme is presumably involved in the homeostasis of those steroid hormones hence regulating BR activity. Transgenic plants overexpressing UGT73C5 show a typical BR-deficient phenotype.
XLOC_008846	XLOC_008846	AT2G18050	Chr2:7845922-7846884	WT	18	OK	3.92995	10.5436	1.42379	2.77515	5e-05	0.000622834	AT2G18050.1	encodes a structurally divergent linker histone whose gene expression is induced by dehydration and ABA.
XLOC_008310	XLOC_008310	AT2G07707	Chr2:3386291-3386768	WT	18	OK	5.12174	13.7392	1.42359	4.01668	0.00025	0.00258687	AT2G07707.1	Plant mitochondrial ATPase, F0 complex, subunit 8 protein; FUNCTIONS IN: cobalt ion binding; INVOLVED IN: ATP synthesis coupled proton transport; LOCATED IN: mitochondrion, vacuole, membrane; EXPRESSED IN: cultured cell, leaf; CONTAINS InterPro DOMAIN/s: ATPase, F0 complex, subunit 8, mitochondrial, plant (InterPro:IPR003319), Protein of unknown function DUF1082, plant mitochondria (InterPro:IPR0…
XLOC_001870	XLOC_001870	AT1G36180	Chr1:13545964-13558870	WT	18	OK	2.80582	7.51666	1.42167	4.63636	5e-05	0.000622834	AT1G36180.1	acetyl-CoA carboxylase 2 (ACC2)
XLOC_005223	XLOC_005223	AT1G24210	Chr1:8573548-8575156	WT	18	OK	1.05807	2.82491	1.41677	2.46914	0.0058	0.0333092	AT1G24210.1	Paired amphipathic helix (PAH2) superfamily protein; FUNCTIONS IN: molecular_function unknown; INVOLVED IN: regulation of transcription, DNA-dependent; LOCATED IN: nucleus; EXPRESSED IN: 10 plant structures; EXPRESSED DURING: 6 growth stages; CONTAINS InterPro DOMAIN/s: Paired amphipathic helix (InterPro:IPR003822); BEST Arabidopsis thaliana protein match is: Paired amphipathic helix (PAH2) super…
XLOC_008290	XLOC_008290	AT2G07749	Chr2:3247233-3249394	WT	18	OK	0.488324	1.29745	1.40977	2.16022	0.00135	0.0104169	AT2G07749.1	Mitovirus RNA-dependent RNA polymerase; CONTAINS InterPro DOMAIN/s: RNA-dependent RNA polymerase, mitoviral (InterPro:IPR008686); BEST Arabidopsis thaliana protein match is: Mitovirus RNA-dependent RNA polymerase (TAIR:ATMG01110.1); Has 35333 Blast hits to 34131 proteins in 2444 species: Archae - 798; Bacteria - 22429; Metazoa - 974; Fungi - 991; Plants - 531; Viruses - 0; Other Eukaryotes - 9610…
XLOC_030553	XLOC_030553	AT5G55470	Chr5:22467319-22472706	WT	18	OK	2.16183	5.72787	1.40575	3.12581	5e-05	0.000622834	AT5G55470.1	member of Sodium proton exchanger family
XLOC_016824	XLOC_016824	AT3G13090	Chr3:4202797-4208225	WT	18	OK	7.04581	18.6561	1.40481	4.89425	5e-05	0.000622834	AT3G13090.1	member of MRP subfamily
XLOC_018438	XLOC_018438	AT3G47050	Chr3:17328032-17330889	WT	18	OK	1.82326	4.81033	1.39961	3.15363	5e-05	0.000622834	AT3G47050.1	Glycosyl hydrolase family protein; FUNCTIONS IN: hydrolase activity, hydrolyzing O-glycosyl compounds; INVOLVED IN: carbohydrate metabolic process; LOCATED IN: vacuole; EXPRESSED IN: sperm cell, pollen tube; CONTAINS InterPro DOMAIN/s: Glycoside hydrolase, family 3, N-terminal (InterPro:IPR001764), Glycoside hydrolase, family 3, C-terminal (InterPro:IPR002772), Glycoside hydrolase, catalytic core…
XLOC_025949	XLOC_025949	AT5G36180	Chr5:14239027-14242135	WT	18	OK	0.736182	1.94207	1.39946	2.20105	0.00055	0.00498267	AT5G36180.1	serine carboxypeptidase-like 1 (scpl1); FUNCTIONS IN: serine-type carboxypeptidase activity; INVOLVED IN: proteolysis; LOCATED IN: endomembrane system; CONTAINS InterPro DOMAIN/s: Peptidase S10, serine carboxypeptidase (InterPro:IPR001563); BEST Arabidopsis thaliana protein match is: serine carboxypeptidase-like 2 (TAIR:AT1G73300.1); Has 30201 Blast hits to 17322 proteins in 780 species: Archae -…
XLOC_006382	XLOC_006382	AT1G52060	Chr1:19359038-19360675	WT	18	OK	1.5704	4.14184	1.39914	2.72809	0.0005	0.00460825	AT1G52060.1	Mannose-binding lectin superfamily protein; FUNCTIONS IN: molecular_function unknown; INVOLVED IN: biological_process unknown; LOCATED IN: endomembrane system; EXPRESSED IN: root; CONTAINS InterPro DOMAIN/s: Mannose-binding lectin (InterPro:IPR001229); BEST Arabidopsis thaliana protein match is: Mannose-binding lectin superfamily protein (TAIR:AT1G52070.1); Has 1499 Blast hits to 773 proteins in …
XLOC_030139	XLOC_030139	AT5G47590	Chr5:19297816-19299152	WT	18	OK	1.54681	4.079	1.39892	2.7503	0.0004	0.00385261	AT5G47590.1	Heat shock protein HSP20/alpha crystallin family; FUNCTIONS IN: aspartic-type endopeptidase activity; INVOLVED IN: proteolysis; LOCATED IN: cellular_component unknown; CONTAINS InterPro DOMAIN/s: Small heat shock protein, predicted, plant (InterPro:IPR016952), Peptidase A1 (InterPro:IPR001461), HSP20-like chaperone (InterPro:IPR008978); BEST Arabidopsis thaliana protein match is: HSP20-like chape…
XLOC_010897	XLOC_010897	AT2G07671	Chr2:3251664-3252113	WT	18	OK	10.1713	26.7106	1.39292	5.03693	5e-05	0.000622834	AT2G07671.1	ATP synthase subunit C family protein; FUNCTIONS IN: hydrogen ion transmembrane transporter activity, ATPase activity; INVOLVED IN: proton transport, ATP synthesis coupled proton transport; LOCATED IN: proton-transporting ATP synthase complex, coupling factor F(o), proton-transporting two-sector ATPase complex, proton-transporting domain; CONTAINS InterPro DOMAIN/s: ATPase, F0 complex, subunit C,…
XLOC_020631	XLOC_020631	AT4G18630	Chr4:10257077-10258943	WT	18	OK	1.37263	3.59815	1.39031	3.02575	0.0001	0.00115693	AT4G18630.1	Protein of unknown function (DUF688); CONTAINS InterPro DOMAIN/s: Protein of unknown function DUF688 (InterPro:IPR007789); BEST Arabidopsis thaliana protein match is: Protein of unknown function (DUF688) (TAIR:AT5G45850.1); Has 118 Blast hits to 95 proteins in 19 species: Archae - 0; Bacteria - 0; Metazoa - 18; Fungi - 3; Plants - 90; Viruses - 0; Other Eukaryotes - 7 (source: NCBI BLink).
XLOC_025091	XLOC_025091	AT5G19970	Chr5:6747391-6748830	WT	18	OK	2.58922	6.78614	1.39007	2.82952	5e-05	0.000622834	AT5G19970.1	unknown protein; Has 1807 Blast hits to 1807 proteins in 277 species: Archae - 0; Bacteria - 0; Metazoa - 736; Fungi - 347; Plants - 385; Viruses - 0; Other Eukaryotes - 339 (source: NCBI BLink).
XLOC_000174	XLOC_000174	AT1G04425	Chr1:1194182-1197098	WT	18	OK	2.29911	6.01665	1.38789	1.81994	0.0047	0.0283471	AT1G04425.1	other RNA
XLOC_018530	XLOC_018530	AT3G48840,AT3G48850	Chr3:18103151-18116770	WT	18	OK	2.07311	5.4234	1.3874	1.76563	0.0044	0.0268984	AT3G48840.1	RNA-binding (RRM/RBD/RNP motifs) family protein; FUNCTIONS IN: nucleotide binding, nucleic acid binding; INVOLVED IN: biological_process unknown; LOCATED IN: cellular_component unknown; CONTAINS InterPro DOMAIN/s: RNA recognition motif, RNP-1 (InterPro:IPR000504), Nucleotide-binding, alpha-beta plait (InterPro:IPR012677); BEST Arabidopsis thaliana protein match is: RNA-binding (RRM/RBD/RNP motifs…
XLOC_026643	XLOC_026643	AT5G48175	Chr5:19539071-19540478	WT	18	OK	1.73073	4.52565	1.38675	1.7945	0.00895	0.046346	AT5G48175.1	FUNCTIONS IN: molecular_function unknown; INVOLVED IN: biological_process unknown; LOCATED IN: endomembrane system; EXPRESSED IN: hypocotyl, male gametophyte, root; BEST Arabidopsis thaliana protein match is: Glycosyl hydrolase superfamily protein (TAIR:AT3G09260.1); Has 30201 Blast hits to 17322 proteins in 780 species: Archae - 12; Bacteria - 1396; Metazoa - 17338; Fungi - 3422; Plants - 5037; …
XLOC_030159	XLOC_030159	AT5G47950	Chr5:19417030-19418546	WT	18	OK	1.71099	4.46526	1.38392	3.20129	5e-05	0.000622834	AT5G47950.1	HXXXD-type acyl-transferase family protein; FUNCTIONS IN: transferase activity, transferring acyl groups other than amino-acyl groups, transferase activity; INVOLVED IN: biological_process unknown; LOCATED IN: cellular_component unknown; EXPRESSED IN: root; CONTAINS InterPro DOMAIN/s: Transferase (InterPro:IPR003480); BEST Arabidopsis thaliana protein match is: HXXXD-type acyl-transferase family …
XLOC_002275	XLOC_002275	AT1G47890	Chr1:17643975-17651425	WT	18	OK	2.01128	5.24843	1.38377	1.93887	0.0075	0.0406372	AT1G47890.1	receptor like protein 7 (RLP7); FUNCTIONS IN: kinase activity; INVOLVED IN: signal transduction, defense response; LOCATED IN: endomembrane system; EXPRESSED IN: stem, stamen; EXPRESSED DURING: 4 anthesis; CONTAINS InterPro DOMAIN/s: Leucine-rich repeat-containing N-terminal domain, type 2 (InterPro:IPR013210), Leucine-rich repeat (InterPro:IPR001611); BEST Arabidopsis thaliana protein match is: …
XLOC_022904	XLOC_022904	AT4G16680	Chr4:9385218-9391085	WT	18	OK	39.5178	103.014	1.38227	4.08229	5e-05	0.000622834	AT4G16680.1	P-loop containing nucleoside triphosphate hydrolases superfamily protein; FUNCTIONS IN: RNA helicase activity, helicase activity, nucleic acid binding, ATP binding, ATP-dependent helicase activity; LOCATED IN: cellular_component unknown; EXPRESSED IN: stem, sepal, male gametophyte, carpel, stamen; EXPRESSED DURING: 4 anthesis, petal differentiation and expansion stage; CONTAINS InterPro DOMAIN/s:…
XLOC_031121	XLOC_031121	AT5G66670	Chr5:26611257-26614547	WT	18	OK	11.0282	28.6468	1.37717	4.42681	5e-05	0.000622834	AT5G66670.1	Protein of unknown function (DUF677); FUNCTIONS IN: molecular_function unknown; INVOLVED IN: biological_process unknown; LOCATED IN: chloroplast; EXPRESSED IN: inflorescence meristem, hypocotyl, root; CONTAINS InterPro DOMAIN/s: Protein of unknown function DUF677 (InterPro:IPR007749); BEST Arabidopsis thaliana protein match is: Protein of unknown function (DUF677) (TAIR:AT5G66660.1); Has 1807 Bla…
XLOC_009148	XLOC_009148	AT2G23270	Chr2:9903214-9903845	WT	18	OK	2.87587	7.46751	1.37663	3.07288	0.00085	0.00715019	AT2G23270.1	unknown protein; FUNCTIONS IN: molecular_function unknown; INVOLVED IN: biological_process unknown; LOCATED IN: endomembrane system; EXPRESSED IN: stem, sperm cell, root, stamen; EXPRESSED DURING: 4 anthesis; BEST Arabidopsis thaliana protein match is: unknown protein (TAIR:AT4G37290.1); Has 36 Blast hits to 35 proteins in 6 species: Archae - 0; Bacteria - 0; Metazoa - 0; Fungi - 0; Plants - 36; …
XLOC_012145	XLOC_012145	AT2G30660	Chr2:13058247-13062560	WT	18	OK	8.02055	20.81	1.3755	4.01057	5e-05	0.000622834	AT2G30660.1	ATP-dependent caseinolytic (Clp) protease/crotonase family protein; FUNCTIONS IN: catalytic activity; INVOLVED IN: metabolic process; EXPRESSED IN: 7 plant structures; EXPRESSED DURING: F mature embryo stage, petal differentiation and expansion stage, LP.12 twelve leaves visible; CONTAINS InterPro DOMAIN/s: Crotonase, core (InterPro:IPR001753); BEST Arabidopsis thaliana protein match is: beta-hyd…
XLOC_014146	XLOC_014146	AT3G21520	Chr3:7581958-7585337	WT	18	OK	4.50043	11.6684	1.37447	2.22225	0.00965	0.0491153	AT3G21520.1	Encodes a protein is directly or indirectly involved in membrane fission during breakdown of the ER and the tonoplast during leaf senescence and in membrane fusion during vacuole biogenesis in roots.
XLOC_015242	XLOC_015242	AT3G45730	Chr3:16789979-16790582	WT	18	OK	74.6632	193.043	1.37045	6.74603	5e-05	0.000622834	AT3G45730.1	unknown protein; Has 3 Blast hits to 3 proteins in 1 species: Archae - 0; Bacteria - 0; Metazoa - 0; Fungi - 0; Plants - 3; Viruses - 0; Other Eukaryotes - 0 (source: NCBI BLink).
XLOC_009036	XLOC_009036	AT2G21640	Chr2:9254458-9255625	WT	18	OK	58.556	151.125	1.36786	6.63174	5e-05	0.000622834	AT2G21640.1	Encodes a protein of unknown function that is a marker for oxidative stress response.
XLOC_021426	XLOC_021426	AT4G33720	Chr4:16182751-16183533	WT	18	OK	6.76705	17.4139	1.36364	4.13655	5e-05	0.000622834	AT4G33720.1	CAP (Cysteine-rich secretory proteins, Antigen 5, and Pathogenesis-related 1 protein) superfamily protein; FUNCTIONS IN: molecular_function unknown; INVOLVED IN: biological_process unknown; LOCATED IN: endomembrane system, extracellular region; EXPRESSED IN: root; CONTAINS InterPro DOMAIN/s: Allergen V5/Tpx-1 related, conserved site (InterPro:IPR018244), Allergen V5/Tpx-1 related (InterPro:IPR001…
XLOC_024529	XLOC_024529	AT5G07760	Chr5:2468238-2473832	WT	18	OK	1.10802	2.84958	1.36276	2.9281	5e-05	0.000622834	AT5G07760.1	formin homology 2 domain-containing protein / FH2 domain-containing protein; FUNCTIONS IN: actin binding; INVOLVED IN: cellular component organization, actin cytoskeleton organization; LOCATED IN: chloroplast; EXPRESSED IN: shoot apex; CONTAINS InterPro DOMAIN/s: Actin-binding FH2/DRF autoregulatory (InterPro:IPR003104), Actin-binding FH2 (InterPro:IPR015425); BEST Arabidopsis thaliana protein ma…
XLOC_023364	XLOC_023364	AT4G25020	Chr4:12860534-12861983	WT	18	OK	2.48938	6.40172	1.36267	2.85152	5e-05	0.000622834	AT4G25020.1	D111/G-patch domain-containing protein; FUNCTIONS IN: nucleic acid binding; INVOLVED IN: biological_process unknown; LOCATED IN: intracellular; EXPRESSED IN: 16 plant structures; EXPRESSED DURING: 8 growth stages; CONTAINS InterPro DOMAIN/s: D111/G-patch (InterPro:IPR000467), KOW (InterPro:IPR005824); BEST Arabidopsis thaliana protein match is: D111/G-patch domain-containing protein (TAIR:AT1G335…
XLOC_028276	XLOC_028276	AT5G13170	Chr5:4181041-4183306	WT	18	OK	0.584129	1.49325	1.3541	2.12212	0.00695	0.0382359	AT5G13170.1	Encodes a member of the SWEET sucrose efflux transporter family proteins.
XLOC_002613	XLOC_002613	AT1G53990	Chr1:20151015-20152752	WT	18	OK	3.59223	9.16692	1.35156	3.62332	5e-05	0.000622834	AT1G53990.1	Contains lipase signature motif and GDSL domain.
XLOC_012860	XLOC_012860	AT2G43590	Chr2:18081330-18082767	WT	18	OK	3.2218	8.21418	1.35025	3.49898	5e-05	0.000622834	AT2G43590.1	Chitinase family protein; FUNCTIONS IN: chitin binding, chitinase activity; INVOLVED IN: carbohydrate metabolic process, cell wall macromolecule catabolic process; LOCATED IN: endomembrane system; EXPRESSED IN: 7 plant structures; EXPRESSED DURING: LP.04 four leaves visible, 4 anthesis, C globular stage, LP.02 two leaves visible; CONTAINS InterPro DOMAIN/s: Chitin-binding, type 1, conserved site …
XLOC_016768	XLOC_016768	AT3G12220	Chr3:3894777-3899020	WT	18	OK	6.06279	15.4406	1.34868	3.1941	5e-05	0.000622834	AT3G12220.1	serine carboxypeptidase-like 16 (scpl16); FUNCTIONS IN: serine-type carboxypeptidase activity; INVOLVED IN: proteolysis; LOCATED IN: endomembrane system; CONTAINS InterPro DOMAIN/s: Peptidase S10, serine carboxypeptidase (InterPro:IPR001563); BEST Arabidopsis thaliana protein match is: serine carboxypeptidase-like 14 (TAIR:AT3G12230.1); Has 3960 Blast hits to 3875 proteins in 462 species: Archae …
XLOC_013662	XLOC_013662	AT3G13210	Chr3:4244899-4250703	WT	18	OK	0.83422	2.12353	1.34797	2.44192	5e-05	0.000622834	AT3G13210.1	crooked neck protein, putative / cell cycle protein, putative; FUNCTIONS IN: binding; INVOLVED IN: mRNA processing, RNA processing; LOCATED IN: intracellular, nucleus; CONTAINS InterPro DOMAIN/s: RNA-processing protein, HAT helix (InterPro:IPR003107), Tetratricopeptide-like helical (InterPro:IPR011990), Tetratricopeptide repeat-containing (InterPro:IPR013026), Suppressor of forked (InterPro:IPR00…
XLOC_000581	XLOC_000581	AT1G12490	Chr1:4260607-4262242	WT	18	OK	0.548598	1.39562	1.34708	1.68516	0.0078	0.041785	AT1G12490.1	F-box associated ubiquitination effector family protein; CONTAINS InterPro DOMAIN/s: F-box associated domain, type 1 (InterPro:IPR006527), F-box associated interaction domain (InterPro:IPR017451); BEST Arabidopsis thaliana protein match is: F-box and associated interaction domains-containing protein (TAIR:AT1G09650.1); Has 239 Blast hits to 239 proteins in 16 species: Archae - 0; Bacteria - 0; Me…
XLOC_021632	XLOC_021632	AT4G37710	Chr4:17718047-17719441	WT	18	OK	17.1293	43.5504	1.34622	4.9845	5e-05	0.000622834	AT4G37710.1	VQ motif-containing protein; FUNCTIONS IN: molecular_function unknown; INVOLVED IN: biological_process unknown; LOCATED IN: chloroplast; EXPRESSED IN: pollen tube; CONTAINS InterPro DOMAIN/s: VQ (InterPro:IPR008889); BEST Arabidopsis thaliana protein match is: VQ motif-containing protein (TAIR:AT2G22880.1); Has 28 Blast hits to 28 proteins in 9 species: Archae - 0; Bacteria - 0; Metazoa - 0; Fung…
XLOC_027013	XLOC_027013	AT5G54660	Chr5:22203904-22205152	WT	18	OK	3.86002	9.80143	1.34438	3.51255	5e-05	0.000622834	AT5G54660.1	HSP20-like chaperones superfamily protein; CONTAINS InterPro DOMAIN/s: Heat shock protein Hsp20 (InterPro:IPR002068), HSP20-like chaperone (InterPro:IPR008978); BEST Arabidopsis thaliana protein match is: HSP20-like chaperones superfamily protein (TAIR:AT1G53540.1); Has 30201 Blast hits to 17322 proteins in 780 species: Archae - 12; Bacteria - 1396; Metazoa - 17338; Fungi - 3422; Plants - 5037; V…
XLOC_006049	XLOC_006049	AT1G43910	Chr1:16654029-16657658	WT	18	OK	90.4105	228.93	1.34035	4.10382	5e-05	0.000622834	AT1G43910.1	P-loop containing nucleoside triphosphate hydrolases superfamily protein; FUNCTIONS IN: nucleoside-triphosphatase activity, ATPase activity, nucleotide binding, ATP binding; LOCATED IN: endomembrane system; EXPRESSED IN: 23 plant structures; EXPRESSED DURING: 13 growth stages; CONTAINS InterPro DOMAIN/s: ATPase, AAA-type, core (InterPro:IPR003959), ATPase, AAA+ type, core (InterPro:IPR003593); BE…
XLOC_011806	XLOC_011806	AT2G24680	Chr2:10492668-10496931	WT	18	OK	0.813853	2.05853	1.33877	1.88255	0.0008	0.00681788	AT2G24680.2	transcriptional factor B3 family protein; FUNCTIONS IN: DNA binding, sequence-specific DNA binding transcription factor activity; INVOLVED IN: regulation of transcription, DNA-dependent; LOCATED IN: cellular_component unknown; CONTAINS InterPro DOMAIN/s: Transcriptional factor B3 (InterPro:IPR003340); BEST Arabidopsis thaliana protein match is: DNA binding;DNA binding;sequence-specific DNA bindin…
XLOC_024007	XLOC_024007	AT4G37370	Chr4:17569827-17571704	WT	18	OK	51.0139	128.966	1.33803	5.27045	5e-05	0.000622834	AT4G37370.1	member of CYP81D
XLOC_014668	XLOC_014668	AT3G29970	Chr3:11745084-11746570	WT	18	OK	220.199	556.527	1.33764	4.43177	5e-05	0.000622834	AT3G29970.1	B12D protein; FUNCTIONS IN: molecular_function unknown; INVOLVED IN: biological_process unknown; LOCATED IN: endomembrane system; EXPRESSED IN: 8 plant structures; EXPRESSED DURING: F mature embryo stage, 4 leaf senescence stage, petal differentiation and expansion stage, E expanded cotyledon stage, D bilateral stage; CONTAINS InterPro DOMAIN/s: B12D (InterPro:IPR010530); BEST Arabidopsis thalian…
XLOC_026234	XLOC_026234	AT5G41290	Chr5:16512325-16513500	WT	18	OK	8.81822	22.2234	1.33352	4.58827	5e-05	0.000622834	AT5G41290.1	Receptor-like protein kinase-related family protein; INVOLVED IN: biological_process unknown; LOCATED IN: anchored to plasma membrane, anchored to membrane; EXPRESSED IN: callus; CONTAINS InterPro DOMAIN/s: Protein of unknown function DUF26 (InterPro:IPR002902); BEST Arabidopsis thaliana protein match is: Receptor-like protein kinase-related family protein (TAIR:AT5G41280.1); Has 1807 Blast hits …
XLOC_021142	XLOC_021142	AT4G28350	Chr4:14026576-14028622	WT	18	OK	0.467857	1.17868	1.33303	2.04693	0.0033	0.0213417	AT4G28350.1	Concanavalin A-like lectin protein kinase family protein; FUNCTIONS IN: in 6 functions; INVOLVED IN: protein amino acid phosphorylation; LOCATED IN: plasma membrane; EXPRESSED IN: stem, cotyledon, leaf, stamen; EXPRESSED DURING: LP.04 four leaves visible, 4 anthesis; CONTAINS InterPro DOMAIN/s: Legume lectin, beta chain (InterPro:IPR001220), Protein kinase, ATP binding site (InterPro:IPR017441), …
XLOC_014553	XLOC_014553	AT3G28540	Chr3:10694443-10696123	WT	18	OK	1.33699	3.36726	1.33258	2.4182	0.0001	0.00115693	AT3G28540.1	P-loop containing nucleoside triphosphate hydrolases superfamily protein; FUNCTIONS IN: nucleoside-triphosphatase activity, ATPase activity, nucleotide binding, ATP binding; EXPRESSED IN: 11 plant structures; EXPRESSED DURING: 9 growth stages; CONTAINS InterPro DOMAIN/s: ATPase, AAA-type, core (InterPro:IPR003959), ATPase, AAA+ type, core (InterPro:IPR003593); BEST Arabidopsis thaliana protein ma…
XLOC_026338	XLOC_026338	AT5G42830	Chr5:17176383-17178018	WT	18	OK	44.1662	111.098	1.33082	5.50876	5e-05	0.000622834	AT5G42830.1	HXXXD-type acyl-transferase family protein; FUNCTIONS IN: transferase activity, transferring acyl groups other than amino-acyl groups, transferase activity; INVOLVED IN: biological_process unknown; LOCATED IN: cellular_component unknown; EXPRESSED IN: 17 plant structures; EXPRESSED DURING: 12 growth stages; CONTAINS InterPro DOMAIN/s: Transferase (InterPro:IPR003480); BEST Arabidopsis thaliana pr…
XLOC_027799	XLOC_027799	AT5G03495	Chr5:873330-875251	WT	18	OK	2.1304	5.3479	1.32785	2.6801	5e-05	0.000622834	AT5G03495.1	RNA-binding (RRM/RBD/RNP motifs) family protein; FUNCTIONS IN: nucleotide binding; INVOLVED IN: biological_process unknown; LOCATED IN: cellular_component unknown; CONTAINS InterPro DOMAIN/s: Nucleotide-binding, alpha-beta plait (InterPro:IPR012677); BEST Arabidopsis thaliana protein match is: RNA-binding (RRM/RBD/RNP motifs) family protein (TAIR:AT5G03480.1); Has 197 Blast hits to 129 proteins i…
XLOC_023099	XLOC_023099	AT4G19925	Chr4:10799874-10800726	WT	18	OK	1.11149	2.78116	1.32319	2.14027	0.0086	0.0448915	AT4G19925.1	Toll-Interleukin-Resistance (TIR) domain family protein; FUNCTIONS IN: transmembrane receptor activity; INVOLVED IN: signal transduction, defense response, innate immune response; LOCATED IN: membrane; CONTAINS InterPro DOMAIN/s: Toll-Interleukin receptor (InterPro:IPR000157); BEST Arabidopsis thaliana protein match is: Toll-Interleukin-Resistance (TIR) domain family protein (TAIR:AT4G19920.1); H…
XLOC_009446	XLOC_009446	AT2G28720	Chr2:12326977-12327678	WT	18	OK	17.2292	43.0811	1.3222	4.83819	5e-05	0.000622834	AT2G28720.1	Histone superfamily protein; FUNCTIONS IN: DNA binding; INVOLVED IN: nucleosome assembly; LOCATED IN: nucleus, nucleosome; EXPRESSED IN: 22 plant structures; EXPRESSED DURING: 13 growth stages; CONTAINS InterPro DOMAIN/s: Histone H2B (InterPro:IPR000558), Histone-fold (InterPro:IPR009072), Histone core (InterPro:IPR007125); BEST Arabidopsis thaliana protein match is: Histone superfamily protein (…
XLOC_003213	XLOC_003213	AT1G65485.1	Chr1:24345295-24347365	WT	18	OK	0.908133	2.26006	1.31538	1.44291	0.00695	0.0382359	AT1G65485.1	transposable element gene; pseudogene, similar to SAE1-S9-protein, blastp match of 45% identity and 1.4e-12 P-value to GP|4760708|dbj|BAA77394.1||AB012866 SAE1-S9-protein {Brassica rapa}
XLOC_030212	XLOC_030212	AT5G48850	Chr5:19805436-19807759	WT	18	OK	1.07363	2.67175	1.3153	2.27737	0.00145	0.0110189	AT5G48850.1	homologous to the wheat sulphate deficiency-induced gene sdi1. Expression in root and leaf is induced by sulfur starvation. Knockout mutants retained higher root and leaf sulfate concentrations, indicating a role in regulation of stored sulfate pools.
XLOC_016191	XLOC_016191	AT3G01420	Chr3:159465-162837	WT	18	OK	28.9145	71.8347	1.31289	4.59025	5e-05	0.000622834	AT3G01420.1	Encodes an alpha-dioxygenase involved in protection against oxidative stress and cell death. Induced in response to Salicylic acid and oxidative stress. Independent of NPR1 in induction by salicylic acid.
XLOC_010920	XLOC_010920	AT2G07706	Chr2:3381511-3386102	WT	18	OK	0.466601	1.1575	1.31075	1.92592	0.0013	0.0101112	AT2G07706.1	unknown protein; BEST Arabidopsis thaliana protein match is: unknown protein (TAIR:ATMG00470.1); Has 35333 Blast hits to 34131 proteins in 2444 species: Archae - 798; Bacteria - 22429; Metazoa - 974; Fungi - 991; Plants - 531; Viruses - 0; Other Eukaryotes - 9610 (source: NCBI BLink).
XLOC_002933	XLOC_002933	AT1G60095	Chr1:22159603-22162447	WT	18	OK	6.25332	15.4848	1.30816	3.92422	5e-05	0.000622834	AT1G60095.1	Mannose-binding lectin superfamily protein; CONTAINS InterPro DOMAIN/s: Mannose-binding lectin (InterPro:IPR001229); BEST Arabidopsis thaliana protein match is: Mannose-binding lectin superfamily protein (TAIR:AT1G60110.1); Has 1880 Blast hits to 685 proteins in 36 species: Archae - 0; Bacteria - 7; Metazoa - 0; Fungi - 0; Plants - 1871; Viruses - 0; Other Eukaryotes - 2 (source: NCBI BLink).
XLOC_026010	XLOC_026010	AT5G37400	Chr5:14834342-14836346	WT	18	OK	2.42583	6.00321	1.30725	3.57931	5e-05	0.000622834	AT5G37400.1	Family of unknown function (DUF577); CONTAINS InterPro DOMAIN/s: Protein of unknown function DUF577 (InterPro:IPR007598); BEST Arabidopsis thaliana protein match is: Family of unknown function (DUF577) (TAIR:AT5G37650.1); Has 1807 Blast hits to 1807 proteins in 277 species: Archae - 0; Bacteria - 0; Metazoa - 736; Fungi - 347; Plants - 385; Viruses - 0; Other Eukaryotes - 339 (source: NCBI BLink).
XLOC_024760	XLOC_024760	AT5G13370	Chr5:4286818-4289554	WT	18	OK	10.5759	26.1704	1.30715	4.87318	5e-05	0.000622834	AT5G13370.1	Auxin-responsive GH3 family protein; CONTAINS InterPro DOMAIN/s: GH3 auxin-responsive promoter (InterPro:IPR004993); BEST Arabidopsis thaliana protein match is: Auxin-responsive GH3 family protein (TAIR:AT5G13360.3); Has 1602 Blast hits to 1450 proteins in 238 species: Archae - 0; Bacteria - 565; Metazoa - 54; Fungi - 2; Plants - 675; Viruses - 0; Other Eukaryotes - 306 (source: NCBI BLink).
XLOC_015800	XLOC_015800	AT3G56275	Chr3:20872830-20873525	WT	18	OK	1.80862	4.46803	1.30476	1.59328	0.0051	0.030077	AT3G56275.1	pseudogene of unknown protein
XLOC_004778	XLOC_004778	AT1G15405	Chr1:5297874-5298166	WT	18	OK	18.0187	44.5117	1.30469	6.23998	5e-05	0.000622834	AT1G15405.1	Unknown gene
XLOC_019093	XLOC_019093	AT3G58980,AT3G58990	Chr3:21794444-21798309	WT	18	OK	14.3304	35.3532	1.30277	3.90945	5e-05	0.000622834	AT3G58980.1	F-box family protein; CONTAINS InterPro DOMAIN/s: F-box domain, cyclin-like (InterPro:IPR001810), F-box domain, Skp2-like (InterPro:IPR022364), FBD-like (InterPro:IPR006566), Leucine-rich repeat 2 (InterPro:IPR013101); BEST Arabidopsis thaliana protein match is: F-box/RNI-like superfamily protein (TAIR:AT3G58920.1); Has 1957 Blast hits to 1579 proteins in 27 species: Archae - 0; Bacteria - 0; Met…
XLOC_027542	XLOC_027542	AT5G64910	Chr5:25940680-25945499	WT	18	OK	5.58903	13.7878	1.30272	2.38577	0.0004	0.00385261	AT5G64910.1	unknown protein; BEST Arabidopsis thaliana protein match is: unknown protein (TAIR:AT5G10010.1); Has 1807 Blast hits to 1807 proteins in 277 species: Archae - 0; Bacteria - 0; Metazoa - 736; Fungi - 347; Plants - 385; Viruses - 0; Other Eukaryotes - 339 (source: NCBI BLink).
XLOC_016216	XLOC_016216	AT3G01970	Chr3:326396-327412	WT	18	OK	45.207	111.445	1.30171	5.45081	5e-05	0.000622834	AT3G01970.1	member of WRKY Transcription Factor; Group I
XLOC_030620	XLOC_030620	AT5G56780	Chr5:22964264-22966241	WT	18	OK	3.3061	8.14305	1.30044	3.57706	5e-05	0.000622834	AT5G56780.1	effector of transcription2 (ET2); BEST Arabidopsis thaliana protein match is: unknown protein (TAIR:AT4G26170.1); Has 86 Blast hits to 52 proteins in 16 species: Archae - 0; Bacteria - 0; Metazoa - 0; Fungi - 0; Plants - 86; Viruses - 0; Other Eukaryotes - 0 (source: NCBI BLink).
XLOC_002473	XLOC_002473	AT1G51470	Chr1:19087412-19090414	WT	18	OK	3.08077	7.57909	1.29873	3.44865	5e-05	0.000622834	AT1G51470.1	Encodes a myrosinase.
XLOC_005669	XLOC_005669	AT1G33640	Chr1:12188909-12200773	WT	18	OK	2.88445	7.09463	1.29843	1.55655	0.0098	0.0496196	AT1G33640.1	unknown protein; FUNCTIONS IN: molecular_function unknown; INVOLVED IN: biological_process unknown; LOCATED IN: endomembrane system; EXPRESSED IN: flower; EXPRESSED DURING: 4 anthesis; Has 1 Blast hits to 1 proteins in 1 species: Archae - 0; Bacteria - 0; Metazoa - 0; Fungi - 0; Plants - 1; Viruses - 0; Other Eukaryotes - 0 (source: NCBI BLink).
XLOC_004785	XLOC_004785	AT1G15520	Chr1:5331857-5338326	WT	18	OK	1.82412	4.46774	1.29235	3.76693	5e-05	0.000622834	AT1G15520.1	ABC transporter family involved in ABA transport and resistance to lead. Localizes to plasma membrane. Upregulated by lead. Expressed in leaves, flowers, stomata and roots.
XLOC_006982	XLOC_006982	AT1G63820	Chr1:23682421-23684367	WT	18	OK	13.8417	33.8749	1.2912	4.83462	5e-05	0.000622834	AT1G63820.1	CCT motif family protein; CONTAINS InterPro DOMAIN/s: CCT domain (InterPro:IPR010402); BEST Arabidopsis thaliana protein match is: CCT motif family protein (TAIR:AT5G41380.1); Has 1633 Blast hits to 1633 proteins in 102 species: Archae - 0; Bacteria - 0; Metazoa - 1; Fungi - 0; Plants - 1587; Viruses - 0; Other Eukaryotes - 45 (source: NCBI BLink).
XLOC_008303	XLOC_008303	AT2G07667,AT2G07698,AT2G07798	Chr2:3354013-3366557	WT	18	OK	17.347	42.3731	1.28846	3.94578	5e-05	0.000622834	AT2G07667.1	unknown protein; FUNCTIONS IN: molecular_function unknown; INVOLVED IN: biological_process unknown; LOCATED IN: mitochondrion; BEST Arabidopsis thaliana protein match is: unknown protein (TAIR:ATMG01180.1); Has 3 Blast hits to 3 proteins in 1 species: Archae - 0; Bacteria - 0; Metazoa - 0; Fungi - 0; Plants - 3; Viruses - 0; Other Eukaryotes - 0 (source: NCBI BLink).
XLOC_018461	XLOC_018461	AT3G47480	Chr3:17496353-17496947	WT	18	OK	8.00974	19.5642	1.28839	4.14532	5e-05	0.000622834	AT3G47480.1	Calcium-binding EF-hand family protein; FUNCTIONS IN: calcium ion binding; INVOLVED IN: biological_process unknown; LOCATED IN: endomembrane system; EXPRESSED IN: 10 plant structures; EXPRESSED DURING: 9 growth stages; CONTAINS InterPro DOMAIN/s: EF-Hand 1, calcium-binding site (InterPro:IPR018247), EF-HAND 2 (InterPro:IPR018249), EF-hand-like domain (InterPro:IPR011992), Calcium-binding EF-hand …
XLOC_016070	XLOC_016070	AT3G61630	Chr3:22805179-22806527	WT	18	OK	5.016	12.2505	1.28823	3.96924	5e-05	0.000622834	AT3G61630.1	CRF6 encodes one of the six cytokinin response factors. CRF5 belongs to the AP2/ERF superfamily of the transcriptional factors. CRF proteins rapidly relocalize to the nucleus in response to cytokinin. Analysis of loos-of-function mutants revealed that the CRFs function redundantly to regulate the development of embryos, cotyledons and leaves.
XLOC_030588	XLOC_030588	AT5G56080	Chr5:22711401-22712364	WT	18	OK	3.88009	9.47121	1.28746	3.36027	0.0001	0.00115693	AT5G56080.1	Encodes a protein with nicotianamine synthase activity. Its transcript levels rise in roots in response to zinc deficiency and rise in leaves in response to elevated levels of zinc.
XLOC_026930	XLOC_026930	AT5G53420	Chr5:21673524-21675733	WT	18	OK	23.3272	56.7911	1.28365	4.25634	5e-05	0.000622834	AT5G53420.1	CCT motif family protein; FUNCTIONS IN: molecular_function unknown; INVOLVED IN: biological_process unknown; LOCATED IN: cellular_component unknown; EXPRESSED IN: 23 plant structures; EXPRESSED DURING: 13 growth stages; CONTAINS InterPro DOMAIN/s: CCT domain (InterPro:IPR010402); BEST Arabidopsis thaliana protein match is: CCT motif family protein (TAIR:AT4G27900.2); Has 30201 Blast hits to 17322…
XLOC_004068	XLOC_004068	AT1G02430,AT1G02440	Chr1:493528-497759	WT	18	OK	2.04011	4.94949	1.27864	1.63957	0.0096	0.0489318	AT1G02430.1	A member of ARF GTPase family. A thaliana has 21 members of this family, known to be essential for vesicle coating and uncoating and functions in GTP-binding. Gene encoding ADP-ribosylation factor and similar to other ARFs and ARF-like proteins.
XLOC_029970	XLOC_029970	AT5G44610	Chr5:17993564-17994676	WT	18	OK	47.9936	116.095	1.27439	4.95278	5e-05	0.000622834	AT5G44610.1	Encodes a protein with seven repeated VEEKK motifs. RNAi and overexpression experiments suggest that the gene is not involved in cell division but might be consequential for cell shape of epidermal and cortical cells. The protein encoded by this gene binds to cortical microtubules and inhibits tubulin polymerization. Associates to the plasma membrane and interacts with calmodulin and phosphatidyl…
XLOC_011450	XLOC_011450	AT2G18193	Chr2:7917504-7919277	WT	18	OK	45.8272	110.783	1.27346	4.86757	5e-05	0.000622834	AT2G18193.1	P-loop containing nucleoside triphosphate hydrolases superfamily protein; FUNCTIONS IN: nucleoside-triphosphatase activity, ATPase activity, nucleotide binding, ATP binding; LOCATED IN: endomembrane system; EXPRESSED IN: callus; CONTAINS InterPro DOMAIN/s: ATPase, AAA-type, core (InterPro:IPR003959), ATPase, AAA+ type, core (InterPro:IPR003593), ATPase, AAA-type, conserved site (InterPro:IPR00396…
XLOC_008471	XLOC_008471	AT2G11810	Chr2:4743321-4746780	WT	18	OK	4.08733	9.86374	1.27098	3.34018	5e-05	0.000622834	AT2G11810.1	MGD3 is the major enzyme for galactolipid metabolism during phosphate starvation. Does not contribute to galactolipid synthesis under P1-sufficient conditions.
XLOC_013211	XLOC_013211	AT3G03500	Chr3:832724-834735	WT	18	OK	2.7887	6.7221	1.26932	2.53255	0.00035	0.00345062	AT3G03500.1	TatD related DNase; FUNCTIONS IN: endodeoxyribonuclease activity, producing 5'-phosphomonoesters, deoxyribonuclease activity; INVOLVED IN: biological_process unknown; LOCATED IN: endomembrane system; CONTAINS InterPro DOMAIN/s: Deoxyribonuclease, TatD Mg-dependent (InterPro:IPR012278), Deoxyribonuclease, TatD (InterPro:IPR015992), Deoxyribonuclease, TatD-related, conserved site (InterPro:IPR01822…
XLOC_015494	XLOC_015494	AT3G50460	Chr3:18727839-18728649	WT	18	OK	2.65349	6.39183	1.26834	2.73478	0.00085	0.00715019	AT3G50460.1	Homolog of RPW8
XLOC_026235	XLOC_026235	AT5G41300	Chr5:16515003-16516102	WT	18	OK	4.34579	10.4598	1.26717	3.52265	5e-05	0.000622834	AT5G41300.1	Receptor-like protein kinase-related family protein; CONTAINS InterPro DOMAIN/s: Protein of unknown function DUF26 (InterPro:IPR002902); BEST Arabidopsis thaliana protein match is: Receptor-like protein kinase-related family protein (TAIR:AT5G41290.1); Has 1807 Blast hits to 1807 proteins in 277 species: Archae - 0; Bacteria - 0; Metazoa - 736; Fungi - 347; Plants - 385; Viruses - 0; Other Eukary…
XLOC_013749	XLOC_013749	AT3G14680	Chr3:4934419-4936563	WT	18	OK	20.9789	50.444	1.26574	4.7345	5e-05	0.000622834	AT3G14680.1	putative cytochrome P450
XLOC_009656	XLOC_009656	AT2G32740	Chr2:13886825-13888232	WT	18	OK	0.642724	1.54171	1.26226	1.94012	0.00505	0.0298624	AT2G32740.1	galactosyltransferase 13 (GT13); FUNCTIONS IN: catalytic activity; INVOLVED IN: biological_process unknown; LOCATED IN: membrane; CONTAINS InterPro DOMAIN/s: Exostosin-like (InterPro:IPR004263); BEST Arabidopsis thaliana protein match is: Exostosin family protein (TAIR:AT2G32750.1); Has 586 Blast hits to 585 proteins in 27 species: Archae - 0; Bacteria - 0; Metazoa - 6; Fungi - 4; Plants - 557; V…
XLOC_022728	XLOC_022728	AT4G13890	Chr4:8031971-8033723	WT	18	OK	4.48885	10.7417	1.2588	3.87998	5e-05	0.000622834	AT4G13890.1	EMBRYO SAC DEVELOPMENT ARREST 37 (EDA36); FUNCTIONS IN: pyridoxal phosphate binding, glycine hydroxymethyltransferase activity, catalytic activity; INVOLVED IN: glycine metabolic process, polar nucleus fusion, L-serine metabolic process, pollen development; LOCATED IN: cellular_component unknown; EXPRESSED IN: male gametophyte, pollen tube; EXPRESSED DURING: L mature pollen stage, M germinated po…
XLOC_003472	XLOC_003472	AT1G70185	Chr1:26429732-26430069	WT	18	OK	5.78712	13.8479	1.25875	3.93421	0.00305	0.0199753	AT1G70185.1	other RNA
XLOC_016823	XLOC_016823	AT3G13080	Chr3:4195733-4201485	WT	18	OK	62.5339	149.62	1.25859	3.75431	5e-05	0.000622834	AT3G13080.1	encodes an ATP-dependent MRP-like ABC transporter able to transport glutathione-conjugates as well as chlorophyll catabolites. The expression of this gene is upregulated by herbicide safeners such as benoxacor and fenclorim.
XLOC_027691	XLOC_027691	AT5G01320	Chr5:129301-131625	WT	18	OK	0.673793	1.6101	1.25677	2.25138	0.00115	0.00914318	AT5G01320.1	Thiamine pyrophosphate dependent pyruvate decarboxylase family protein; FUNCTIONS IN: in 6 functions; LOCATED IN: cellular_component unknown; CONTAINS InterPro DOMAIN/s: TPP-binding enzyme, conserved site (InterPro:IPR000399), Thiamine pyrophosphate enzyme, central domain (InterPro:IPR012000), Pyruvate decarboxylase/indolepyruvate decarboxylase (InterPro:IPR012110), Thiamine pyrophosphate enzyme,…
XLOC_028100	XLOC_028100	AT5G09720	Chr5:3011647-3014519	WT	18	OK	1.68721	4.03034	1.25626	2.32146	0.0003	0.0030153	AT5G09720.1	Magnesium transporter CorA-like family protein; BEST Arabidopsis thaliana protein match is: magnesium transporter 7 (TAIR:AT5G09690.3); Has 601 Blast hits to 596 proteins in 130 species: Archae - 0; Bacteria - 0; Metazoa - 46; Fungi - 173; Plants - 356; Viruses - 0; Other Eukaryotes - 26 (source: NCBI BLink).
XLOC_028610	XLOC_028610	AT5G19600	Chr5:6612814-6616997	WT	18	OK	5.22208	12.4669	1.25541	4.25278	5e-05	0.000622834	AT5G19600.1	Encodes sulfate transporter Sultr3;5.
XLOC_020154	XLOC_020154	AT4G10510	Chr4:6495798-6499189	WT	18	OK	3.70803	8.84949	1.25494	3.6497	5e-05	0.000622834	AT4G10510.1	Subtilase family protein; FUNCTIONS IN: identical protein binding, serine-type endopeptidase activity; INVOLVED IN: proteolysis, negative regulation of catalytic activity; EXPRESSED IN: male gametophyte, root; CONTAINS InterPro DOMAIN/s: Protease-associated PA (InterPro:IPR003137), Proteinase inhibitor, propeptide (InterPro:IPR009020), Peptidase S8/S53, subtilisin/kexin/sedolisin (InterPro:IPR000…
XLOC_004666	XLOC_004666	AT1G13480	Chr1:4622633-4624070	WT	18	OK	39.0106	93.0769	1.25456	4.91296	5e-05	0.000622834	AT1G13480.1	Protein of unknown function (DUF1262); CONTAINS InterPro DOMAIN/s: Protein of unknown function DUF1262 (InterPro:IPR010683); BEST Arabidopsis thaliana protein match is: Protein of unknown function (DUF1262) (TAIR:AT1G13520.1); Has 111 Blast hits to 104 proteins in 9 species: Archae - 0; Bacteria - 0; Metazoa - 0; Fungi - 0; Plants - 111; Viruses - 0; Other Eukaryotes - 0 (source: NCBI BLink).
XLOC_013582	XLOC_013582	AT3G11390	Chr3:3569827-3571960	WT	18	OK	1.78334	4.25265	1.25378	3.24346	5e-05	0.000622834	AT3G11390.1	Cysteine/Histidine-rich C1 domain family protein; CONTAINS InterPro DOMAIN/s: DC1 (InterPro:IPR004146), C1-like (InterPro:IPR011424); BEST Arabidopsis thaliana protein match is: Cysteine/Histidine-rich C1 domain family protein (TAIR:AT3G11385.1); Has 2141 Blast hits to 1172 proteins in 142 species: Archae - 0; Bacteria - 55; Metazoa - 226; Fungi - 102; Plants - 1594; Viruses - 38; Other Eukaryote…
XLOC_015994	XLOC_015994	AT3G60420	Chr3:22334423-22337617	WT	18	OK	10.2033	24.3122	1.25265	4.39722	5e-05	0.000622834	AT3G60420.2	Phosphoglycerate mutase family protein; LOCATED IN: cellular_component unknown; EXPRESSED IN: 17 plant structures; EXPRESSED DURING: 10 growth stages; CONTAINS InterPro DOMAIN/s: Histidine phosphatase superfamily, clade-1 (InterPro:IPR013078); BEST Arabidopsis thaliana protein match is: Phosphoglycerate mutase family protein (TAIR:AT3G60450.1); Has 30201 Blast hits to 17322 proteins in 780 specie…
XLOC_020203	XLOC_020203	AT4G11310	Chr4:6881029-6885551	WT	18	OK	3.22966	7.66742	1.24736	2.64347	5e-05	0.000622834	AT4G11310.1	cysteine proteinase precursor-like protein
XLOC_030235	XLOC_030235	AT5G49301	Chr5:19986529-19991532	WT	18	OK	1.20485	2.85142	1.24283	2.41244	5e-05	0.000622834	AT5G49301.1	Pseudogene of AT5G49310; importin alpha-1 subunit, putative
XLOC_023836	XLOC_023836	AT4G33880	Chr4:16239362-16241137	WT	18	OK	0.639644	1.51374	1.24278	1.88526	0.0055	0.0319313	AT4G33880.1	RSL2 was expressed concurrently with RSL4 and its expression was controlled by RHD6 and RSL1. Required for root-hair growth.
XLOC_006964	XLOC_006964	AT1G63410	Chr1:23510074-23512129	WT	18	OK	5.84082	13.8146	1.24195	2.63314	5e-05	0.000622834	AT1G63410.1	Protein of unknown function (DUF567); CONTAINS InterPro DOMAIN/s: Protein of unknown function DUF567 (InterPro:IPR007612); BEST Arabidopsis thaliana protein match is: Protein of unknown function (DUF567) (TAIR:AT3G14260.1); Has 268 Blast hits to 267 proteins in 12 species: Archae - 0; Bacteria - 0; Metazoa - 0; Fungi - 0; Plants - 268; Viruses - 0; Other Eukaryotes - 0 (source: NCBI BLink).
XLOC_001442	XLOC_001442	AT1G29100	Chr1:10168740-10169924	WT	18	OK	6.45437	15.2578	1.2412	1.70011	0.00585	0.0334757	AT1G29100.1	Heavy metal transport/detoxification superfamily protein ; FUNCTIONS IN: copper ion binding, metal ion binding; INVOLVED IN: copper ion transport, metal ion transport; CONTAINS InterPro DOMAIN/s: Heavy metal transport/detoxification protein (InterPro:IPR006121); BEST Arabidopsis thaliana protein match is: Heavy metal transport/detoxification superfamily protein (TAIR:AT1G06330.1); Has 899 Blast h…
XLOC_003504	XLOC_003504	AT1G70810	Chr1:26704129-26705236	WT	18	OK	41.6981	98.5497	1.24087	5.33174	5e-05	0.000622834	AT1G70810.1	Calcium-dependent lipid-binding (CaLB domain) family protein; CONTAINS InterPro DOMAIN/s: C2 membrane targeting protein (InterPro:IPR018029), C2 calcium/lipid-binding domain, CaLB (InterPro:IPR008973), C2 calcium-dependent membrane targeting (InterPro:IPR000008); BEST Arabidopsis thaliana protein match is: Calcium-dependent lipid-binding (CaLB domain) family protein (TAIR:AT1G70800.1); Has 2955 B…
XLOC_008311	XLOC_008311	AT2G07708	Chr2:3386850-3394516	WT	18	OK	4.66277	11.0002	1.23827	3.04374	5e-05	0.000622834	AT2G07708.1	unknown protein; BEST Arabidopsis thaliana protein match is: unknown protein (TAIR:ATMG00500.1); Has 9 Blast hits to 9 proteins in 2 species: Archae - 0; Bacteria - 0; Metazoa - 0; Fungi - 0; Plants - 9; Viruses - 0; Other Eukaryotes - 0 (source: NCBI BLink).
XLOC_004074	XLOC_004074	AT1G02590	Chr1:544782-552761	WT	18	OK	1.47005	3.46002	1.23491	1.64754	0.0039	0.0244032	AT1G02590.1	Aldehyde oxidase/xanthine dehydrogenase, molybdopterin binding protein; FUNCTIONS IN: oxidoreductase activity, aldehyde oxidase activity; INVOLVED IN: oxidation reduction; LOCATED IN: cellular_component unknown; CONTAINS InterPro DOMAIN/s: Aldehyde oxidase/xanthine dehydrogenase, molybdopterin binding (InterPro:IPR008274); BEST Arabidopsis thaliana protein match is: aldehyde oxidase 4 (TAIR:AT1G0…
XLOC_014327	XLOC_014327	AT3G24500	Chr3:8918678-8923073	WT	18	OK	130.215	306.147	1.23333	2.46477	0.00505	0.0298624	AT3G24500.1	One of three genes in A. thaliana encoding multiprotein bridging factor 1, a highly conserved transcriptional coactivator. May serve as a bridging factor between a bZIP factor and TBP. Its expression is specifically elevated in response to pathogen infection, salinity, drought, heat, hydrogen peroxide, and application of abscisic acid or salicylic acid. Constitutive expression enhances the tolera…
XLOC_028038	XLOC_028038	AT5G08220,AT5G08230	Chr5:2641240-2650083	WT	18	OK	12.0096	28.2355	1.23332	1.80038	0.00665	0.0369447	AT5G08220.1	unknown protein; Has 1 Blast hits to 1 proteins in 1 species: Archae - 0; Bacteria - 0; Metazoa - 0; Fungi - 0; Plants - 1; Viruses - 0; Other Eukaryotes - 0 (source: NCBI BLink).
XLOC_028346	XLOC_028346	AT5G14490	Chr5:4670214-4672961	WT	18	OK	1.41484	3.32414	1.23234	2.19065	0.00065	0.00575485	AT5G14490.1	NAC domain containing protein 85 (NAC085); FUNCTIONS IN: sequence-specific DNA binding transcription factor activity; INVOLVED IN: multicellular organismal development, regulation of transcription; CONTAINS InterPro DOMAIN/s: No apical meristem (NAM) protein (InterPro:IPR003441); BEST Arabidopsis thaliana protein match is: NAC domain containing protein 44 (TAIR:AT3G01600.1); Has 2068 Blast hits t…
XLOC_000871	XLOC_000871	AT1G17950	Chr1:6177616-6179289	WT	18	OK	2.57041	6.03247	1.23075	3.04139	0.00015	0.00165462	AT1G17950.1	putative transcription factor: R2R3-MYB transcription family
XLOC_012432	XLOC_012432	AT2G35910	Chr2:15072931-15074081	WT	18	OK	2.889	6.77361	1.22936	3.30763	0.00015	0.00165462	AT2G35910.1	RING/U-box superfamily protein; FUNCTIONS IN: zinc ion binding; CONTAINS InterPro DOMAIN/s: Zinc finger, RING-type (InterPro:IPR001841), Zinc finger, C3HC4 RING-type (InterPro:IPR018957); BEST Arabidopsis thaliana protein match is: RING/U-box superfamily protein (TAIR:AT5G06490.1); Has 8225 Blast hits to 8203 proteins in 288 species: Archae - 0; Bacteria - 0; Metazoa - 1997; Fungi - 507; Plants -…
XLOC_009893	XLOC_009893	AT2G36950	Chr2:15515132-15516931	WT	18	OK	107.198	251.337	1.22935	4.33125	5e-05	0.000622834	AT2G36950.1	Heavy metal transport/detoxification superfamily protein ; FUNCTIONS IN: copper ion binding, metal ion binding; INVOLVED IN: metal ion transport; LOCATED IN: cellular_component unknown; EXPRESSED IN: 15 plant structures; EXPRESSED DURING: 4 anthesis, C globular stage, petal differentiation and expansion stage; CONTAINS InterPro DOMAIN/s: Heavy metal transport/detoxification protein (InterPro:IPR0…
XLOC_013128	XLOC_013128	AT3G01760	Chr3:273298-275270	WT	18	OK	0.858022	2.01125	1.22901	2.16056	0.0035	0.0224038	AT3G01760.1	Transmembrane amino acid transporter family protein; CONTAINS InterPro DOMAIN/s: Amino acid transporter, transmembrane (InterPro:IPR013057); BEST Arabidopsis thaliana protein match is: Transmembrane amino acid transporter family protein (TAIR:AT1G61270.1); Has 4381 Blast hits to 4371 proteins in 390 species: Archae - 5; Bacteria - 296; Metazoa - 1264; Fungi - 731; Plants - 1536; Viruses - 3; Othe…
XLOC_012034	XLOC_012034	AT2G28700	Chr2:12317165-12318746	WT	18	OK	2.96704	6.94896	1.22778	2.68043	5e-05	0.000622834	AT2G28700.1	AGAMOUS-like 46 (AGL46); FUNCTIONS IN: DNA binding, sequence-specific DNA binding transcription factor activity; INVOLVED IN: regulation of transcription, DNA-dependent; LOCATED IN: nucleus; EXPRESSED IN: endosperm; CONTAINS InterPro DOMAIN/s: Transcription factor, MADS-box (InterPro:IPR002100); BEST Arabidopsis thaliana protein match is: MADS-box transcription factor family protein (TAIR:AT3G058…
XLOC_007057	XLOC_007057	AT1G65370	Chr1:24284468-24286145	WT	18	OK	59.0422	138.147	1.22639	5.14236	5e-05	0.000622834	AT1G65370.1	TRAF-like family protein; CONTAINS InterPro DOMAIN/s: TRAF-like (InterPro:IPR008974), MATH (InterPro:IPR002083); BEST Arabidopsis thaliana protein match is: TRAF-like family protein (TAIR:AT1G65150.2); Has 460 Blast hits to 456 proteins in 21 species: Archae - 0; Bacteria - 0; Metazoa - 0; Fungi - 0; Plants - 453; Viruses - 0; Other Eukaryotes - 7 (source: NCBI BLink).
XLOC_014494	XLOC_014494	AT3G27650	Chr3:10238545-10240611	WT	18	OK	9.23567	21.5782	1.22428	4.13917	5e-05	0.000622834	AT3G27650.1	LOB domain-containing protein 25 (LBD25); CONTAINS InterPro DOMAIN/s: Lateral organ boundaries, LOB (InterPro:IPR004883); BEST Arabidopsis thaliana protein match is: Lateral organ boundaries (LOB) domain family protein (TAIR:AT5G63090.4); Has 960 Blast hits to 955 proteins in 25 species: Archae - 0; Bacteria - 0; Metazoa - 0; Fungi - 0; Plants - 960; Viruses - 0; Other Eukaryotes - 0 (source: NCB…
XLOC_016702	XLOC_016702	AT3G10986	Chr3:3444202-3445672	WT	18	OK	3.48635	8.1356	1.22253	3.02763	0.0012	0.00948481	AT3G10986.1	Protein of unknown function (DUF567); FUNCTIONS IN: molecular_function unknown; INVOLVED IN: biological_process unknown; LOCATED IN: cellular_component unknown; CONTAINS InterPro DOMAIN/s: Protein of unknown function DUF567 (InterPro:IPR007612); BEST Arabidopsis thaliana protein match is: Protein of unknown function (DUF567) (TAIR:AT3G56180.1); Has 30201 Blast hits to 17322 proteins in 780 specie…
XLOC_027752	XLOC_027752	AT5G02490	Chr5:550034-552647	WT	18	OK	16.0098	37.3043	1.22038	4.58582	5e-05	0.000622834	AT5G02490.1	Heat shock protein 70 (Hsp 70) family protein; FUNCTIONS IN: protein binding; INVOLVED IN: protein folding, response to cadmium ion, response to heat, response to bacterium; LOCATED IN: cytosol, cell wall, plasma membrane; EXPRESSED IN: 19 plant structures; EXPRESSED DURING: 10 growth stages; CONTAINS InterPro DOMAIN/s: Heat shock protein 70, conserved site (InterPro:IPR018181), Heat shock protei…
XLOC_006892	XLOC_006892	AT1G62180	Chr1:22973839-22977625	WT	18	OK	39.346	91.3046	1.21447	4.19334	5e-05	0.000622834	AT1G62180.1	encodes a adenosine 5'-phosphosulfate reductase, involved in sulfate assimilation. Is a major effect locus for natural variation of shoot sulfate content in Arabidopsis.
XLOC_018111	XLOC_018111	AT3G42658.1	Chr3:14748403-14750401	WT	18	OK	6.50499	15.0914	1.21411	3.09283	5e-05	0.000622834	AT3G42658.1	Member of Sadhu non-coding retrotransposon family.In some natural accessions the allele is methylated and silenced.
XLOC_002945	XLOC_002945	AT1G60500	Chr1:22291581-22293964	WT	18	OK	0.518239	1.20113	1.2127	1.99199	0.0025	0.0170945	AT1G60500.1	Dynamin related protein 4C (DRP4C); FUNCTIONS IN: GTP binding, GTPase activity; INVOLVED IN: biological_process unknown; LOCATED IN: cellular_component unknown; EXPRESSED IN: egg cell; CONTAINS InterPro DOMAIN/s: Dynamin GTPase effector (InterPro:IPR003130), Dynamin, GTPase domain (InterPro:IPR001401), GTPase effector domain, GED (InterPro:IPR020850), Dynamin central region (InterPro:IPR000375), …
XLOC_010896	XLOC_010896	AT2G07777	Chr2:3250756-3251545	WT	18	OK	3.0914	7.16101	1.2119	2.95339	0.00035	0.00345062	AT2G07777.1	ATP synthase 9 mitochondrial; BEST Arabidopsis thaliana protein match is: ATP synthase 9 mitochondrial (TAIR:ATMG01090.1); Has 35333 Blast hits to 34131 proteins in 2444 species: Archae - 798; Bacteria - 22429; Metazoa - 974; Fungi - 991; Plants - 531; Viruses - 0; Other Eukaryotes - 9610 (source: NCBI BLink).
XLOC_030941	XLOC_030941	AT5G63160	Chr5:25333262-25335485	WT	18	OK	38.6813	89.5678	1.21134	4.72934	5e-05	0.000622834	AT5G63160.1	BTB and TAZ domain protein. Short-lived nuclear-cytoplasmic protein targeted for degradation by the 26S proteosome pathway. Acts redundantly with BT2 and BT3 during female gametophyte development.
XLOC_000359	XLOC_000359	AT1G08500	Chr1:2689015-2690045	WT	18	OK	2.00768	4.63245	1.20625	2.65541	0.00135	0.0104169	AT1G08500.1	early nodulin-like protein 18 (ENODL18); FUNCTIONS IN: electron carrier activity, copper ion binding; LOCATED IN: anchored to membrane; EXPRESSED IN: 14 plant structures; EXPRESSED DURING: LP.06 six leaves visible, 4 anthesis, petal differentiation and expansion stage, LP.08 eight leaves visible, E expanded cotyledon stage; CONTAINS InterPro DOMAIN/s: Plastocyanin-like (InterPro:IPR003245), Cupre…
XLOC_016048	XLOC_016048	AT3G61280	Chr3:22680959-22683769	WT	18	OK	0.543018	1.2527	1.20596	1.73796	0.00315	0.0205306	AT3G61280.1	CONTAINS InterPro DOMAIN/s: Lipopolysaccharide-modifying protein (InterPro:IPR006598), Protein of unknown function DUF821, CAP10-like (InterPro:IPR008539); BEST Arabidopsis thaliana protein match is: Arabidopsis thaliana protein of unknown function (DUF821) (TAIR:AT3G61290.1); Has 683 Blast hits to 672 proteins in 134 species: Archae - 0; Bacteria - 47; Metazoa - 230; Fungi - 121; Plants - 246; V…
XLOC_028907	XLOC_028907	AT5G25754	Chr5:8953450-8963875	WT	18	OK	8.95468	20.6491	1.20537	2.42295	0.00125	0.00979176	AT5G25754.1	RNA polymerase I-associated factor PAF67; FUNCTIONS IN: molecular_function unknown; INVOLVED IN: biological_process unknown; LOCATED IN: plasma membrane, membrane; EXPRESSED IN: leaf; CONTAINS InterPro DOMAIN/s: RNA polymerase I-associated factor PAF67 (InterPro:IPR019382); BEST Arabidopsis thaliana protein match is: RNA polymerase I-associated factor PAF67 (TAIR:AT5G25757.1); Has 30201 Blast hit…
XLOC_026475	XLOC_026475	AT5G45000	Chr5:18165382-18167193	WT	18	OK	3.69735	8.5119	1.20299	3.28955	5e-05	0.000622834	AT5G45000.1	Disease resistance protein (TIR-NBS-LRR class) family; FUNCTIONS IN: transmembrane receptor activity; INVOLVED IN: signal transduction, defense response, innate immune response; LOCATED IN: intrinsic to membrane; EXPRESSED IN: 9 plant structures; EXPRESSED DURING: 7 growth stages; CONTAINS InterPro DOMAIN/s: Toll-Interleukin receptor (InterPro:IPR000157); BEST Arabidopsis thaliana protein match i…
XLOC_003383	XLOC_003383	AT1G68620	Chr1:25765946-25767240	WT	18	OK	2.81328	6.46631	1.20069	3.06511	5e-05	0.000622834	AT1G68620.1	alpha/beta-Hydrolases superfamily protein; FUNCTIONS IN: hydrolase activity; INVOLVED IN: metabolic process; LOCATED IN: cellular_component unknown; EXPRESSED IN: 11 plant structures; EXPRESSED DURING: LP.06 six leaves visible, LP.04 four leaves visible, 4 anthesis, C globular stage, petal differentiation and expansion stage; CONTAINS InterPro DOMAIN/s: Lipase, GDXG, active site (InterPro:IPR0021…
XLOC_028271	XLOC_028271	AT5G13080	Chr5:4149739-4151150	WT	18	OK	47.4962	108.919	1.19738	5.21062	5e-05	0.000622834	AT5G13080.1	WRKY75 is one of several transcription factors induced during Pi deprivation. It is nuclear localized and regulated differentially during Pi starvation. RNAi mediated suppression of WRKY75 made the plants more susceptible to Pi stress as indicated by the higher accumulation of anthocyanin during Pi starvation.
XLOC_017424	XLOC_017424	AT3G24430	Chr3:8868582-8872201	WT	18	OK	1.41441	3.24237	1.19685	2.25365	0.0002	0.00212981	AT3G24430.1	Encodes chloroplast protein HCF101 (high chlorophyll fluorescence 101). Serves as a chloroplast scaffold protein that specifically assembles [4Fe-4S] clusters and transfers them to the chloroplast membrane and soluble target proteins.
XLOC_015495	XLOC_015495	AT3G50470	Chr3:18729053-18730269	WT	18	OK	1.76311	4.04054	1.19643	2.32266	0.00265	0.0179038	AT3G50470.1	Homolog of RPW8
XLOC_015405	XLOC_015405	AT3G48650	Chr3:18024662-18026208	WT	18	OK	2.19219	5.0169	1.19442	2.39656	0.00015	0.00165462	AT3G48650.1	pseudogene, At14a-related protein, similar to At14a (GI:11994571 and GI:11994573) (Arabidopsis thaliana)
XLOC_027188	XLOC_027188	AT5G57920	Chr5:23452959-23454397	WT	18	OK	1.67284	3.82736	1.19405	1.73511	0.00405	0.0251444	AT5G57920.1	early nodulin-like protein 10 (ENODL10); FUNCTIONS IN: electron carrier activity, copper ion binding; LOCATED IN: endomembrane system; EXPRESSED IN: 14 plant structures; EXPRESSED DURING: 10 growth stages; CONTAINS InterPro DOMAIN/s: Plastocyanin-like (InterPro:IPR003245), Cupredoxin (InterPro:IPR008972); BEST Arabidopsis thaliana protein match is: early nodulin-like protein 15 (TAIR:AT4G31840.1)…
XLOC_000628	XLOC_000628	AT1G13300	Chr1:4554482-4558753	WT	18	OK	16.2569	37.1513	1.19236	3.51238	5e-05	0.000622834	AT1G13300.1	Overexpression confers hypersensitivity to low phosphate-elicited inhibition of primary root growth.
XLOC_027956	XLOC_027956	AT5G06570,AT5G06580	Chr5:2007302-2018835	WT	18	OK	17.6426	40.3052	1.1919	3.73237	5e-05	0.000622834	AT5G06570.1	alpha/beta-Hydrolases superfamily protein; FUNCTIONS IN: hydrolase activity; INVOLVED IN: metabolic process; LOCATED IN: cellular_component unknown; EXPRESSED IN: 6 plant structures; EXPRESSED DURING: petal differentiation and expansion stage; CONTAINS InterPro DOMAIN/s: Alpha/beta hydrolase fold-3 (InterPro:IPR013094); BEST Arabidopsis thaliana protein match is: carboxyesterase 17 (TAIR:AT5G1608…
XLOC_004131	XLOC_004131	AT1G03650,AT1G03660	Chr1:909953-913808	WT	18	OK	7.58825	17.3284	1.1913	1.80833	0.00225	0.0156972	AT1G03650.1	Acyl-CoA N-acyltransferases (NAT) superfamily protein; FUNCTIONS IN: N-acetyltransferase activity; INVOLVED IN: metabolic process; LOCATED IN: cellular_component unknown; CONTAINS InterPro DOMAIN/s: GCN5-related N-acetyltransferase, C-terminal (InterPro:IPR022610), GCN5-related N-acetyltransferase (InterPro:IPR000182), Acyl-CoA N-acyltransferase (InterPro:IPR016181); Has 3295 Blast hits to 3295 p…
XLOC_013816	XLOC_013816	AT3G15760	Chr3:5337546-5338467	WT	18	OK	2.16568	4.93898	1.18939	2.63004	0.00165	0.0121901	AT3G15760.1	unknown protein; FUNCTIONS IN: molecular_function unknown; INVOLVED IN: biological_process unknown; LOCATED IN: endomembrane system; EXPRESSED IN: 22 plant structures; EXPRESSED DURING: 10 growth stages; BEST Arabidopsis thaliana protein match is: unknown protein (TAIR:AT1G52565.1); Has 42 Blast hits to 42 proteins in 10 species: Archae - 0; Bacteria - 0; Metazoa - 0; Fungi - 0; Plants - 42; Viru…
XLOC_019435	XLOC_019435	AT4G01350	Chr4:560258-562438	WT	18	OK	9.939	22.652	1.18847	4.35541	5e-05	0.000622834	AT4G01350.1	Cysteine/Histidine-rich C1 domain family protein; FUNCTIONS IN: zinc ion binding; INVOLVED IN: response to chitin; CONTAINS InterPro DOMAIN/s: Protein kinase C-like, phorbol ester/diacylglycerol binding (InterPro:IPR002219), DC1 (InterPro:IPR004146), Zinc finger, PHD-type (InterPro:IPR001965), C1-like (InterPro:IPR011424); BEST Arabidopsis thaliana protein match is: Cysteine/Histidine-rich C1 dom…
XLOC_027783	XLOC_027783	AT5G03210	Chr5:762786-763321	WT	18	OK	9.89006	22.5278	1.18766	4.05279	5e-05	0.000622834	AT5G03210.1	Encodes a small polypeptide contributing to resistance to potyvirus.
XLOC_010073	XLOC_010073	AT2G40390	Chr2:16867292-16869089	WT	18	OK	6.70043	15.2057	1.18229	4.06084	5e-05	0.000622834	AT2G40390.1	unknown protein; BEST Arabidopsis thaliana protein match is: unknown protein (TAIR:AT5G64190.1); Has 75 Blast hits to 75 proteins in 11 species: Archae - 0; Bacteria - 0; Metazoa - 0; Fungi - 0; Plants - 74; Viruses - 0; Other Eukaryotes - 1 (source: NCBI BLink).
XLOC_001170	XLOC_001170	AT1G23530	Chr1:8345594-8346651	WT	18	OK	7.31296	16.5572	1.17893	3.75534	5e-05	0.000622834	AT1G23530.1	unknown protein; BEST Arabidopsis thaliana protein match is: unknown protein (TAIR:AT1G70470.1); Has 38 Blast hits to 38 proteins in 12 species: Archae - 0; Bacteria - 0; Metazoa - 0; Fungi - 0; Plants - 37; Viruses - 0; Other Eukaryotes - 1 (source: NCBI BLink).
XLOC_020129	XLOC_020129	AT4G10120	Chr4:6314004-6321643	WT	18	OK	2.54288	5.74854	1.17673	2.76889	5e-05	0.000622834	AT4G10120.1	Encodes a protein with putative sucrose-phosphate synthase activity.
XLOC_006502	XLOC_006502	AT1G54010	Chr1:20158663-20160815	WT	18	OK	2.64675	5.98086	1.17613	3.04439	5e-05	0.000622834	AT1G54010.1	GDSL-like Lipase/Acylhydrolase superfamily protein; FUNCTIONS IN: hydrolase activity, acting on ester bonds, carboxylesterase activity; INVOLVED IN: lipid metabolic process; LOCATED IN: plasma membrane, vacuole, membrane; EXPRESSED IN: cultured cell, leaf; EXPRESSED DURING: seedling growth; CONTAINS InterPro DOMAIN/s: Lipase, GDSL (InterPro:IPR001087); BEST Arabidopsis thaliana protein match is: …
XLOC_029627	XLOC_029627	AT5G38740	Chr5:15513024-15514305	WT	18	OK	1.28775	2.90906	1.1757	2.30049	0.0014	0.0107085	AT5G38740.1	AGAMOUS-like 77 (AGL77); FUNCTIONS IN: sequence-specific DNA binding transcription factor activity; INVOLVED IN: regulation of transcription, DNA-dependent; LOCATED IN: nucleus; EXPRESSED IN: central cell, antipodal cell; CONTAINS InterPro DOMAIN/s: Transcription factor, MADS-box (InterPro:IPR002100); BEST Arabidopsis thaliana protein match is: AGAMOUS-like 81 (TAIR:AT5G39750.1); Has 1807 Blast h…
XLOC_026364	XLOC_026364	AT5G43360	Chr5:17409229-17411721	WT	18	OK	0.543632	1.2272	1.17467	1.75059	0.0034	0.0218916	AT5G43360.1	Encodes Pht1;3, a member of the Pht1 family of phosphate transporters which include: Pht1;1/At5g43350, Pht1;2/At5g43370, Pht1;3/At5g43360, Pht1;4/At2g38940, Pht1;5/At2g32830, Pht1;6/At5g43340, Pht1;7/At3g54700, Pht1;8/At1g20860, Pht1;9/At1g76430 (Plant Journal 2002, 31:341).
XLOC_009940	XLOC_009940	AT2G37870	Chr2:15859238-15859907	WT	18	OK	29.3673	66.2597	1.17392	5.0569	5e-05	0.000622834	AT2G37870.1	Bifunctional inhibitor/lipid-transfer protein/seed storage 2S albumin superfamily protein; FUNCTIONS IN: lipid binding; INVOLVED IN: lipid transport; LOCATED IN: endomembrane system; EXPRESSED IN: 11 plant structures; EXPRESSED DURING: LP.06 six leaves visible, LP.04 four leaves visible, 4 anthesis, C globular stage, petal differentiation and expansion stage; CONTAINS InterPro DOMAIN/s: Bifunctio…
XLOC_019454	XLOC_019454	AT4G01600	Chr4:693180-694340	WT	18	OK	2.84495	6.41708	1.17351	2.12186	0.0007	0.00608993	AT4G01600.1	GRAM domain family protein; CONTAINS InterPro DOMAIN/s: GRAM (InterPro:IPR004182); BEST Arabidopsis thaliana protein match is: FH interacting protein 1 (TAIR:AT1G28200.1); Has 358 Blast hits to 358 proteins in 24 species: Archae - 0; Bacteria - 0; Metazoa - 0; Fungi - 0; Plants - 358; Viruses - 0; Other Eukaryotes - 0 (source: NCBI BLink).
XLOC_017156	XLOC_017156	AT3G19430	Chr3:6736183-6738330	WT	18	OK	1.10562	2.4908	1.17176	2.43779	0.00095	0.00781522	AT3G19430.1	late embryogenesis abundant protein-related / LEA protein-related; CONTAINS InterPro DOMAIN/s: Root cap (InterPro:IPR009646); BEST Arabidopsis thaliana protein match is: Late embryogenesis abundant (LEA) protein-related (TAIR:AT5G60520.1); Has 407828 Blast hits to 124211 proteins in 3571 species: Archae - 1492; Bacteria - 100012; Metazoa - 145570; Fungi - 58500; Plants - 39690; Viruses - 10531; O…
XLOC_001318	XLOC_001318	AT1G26970	Chr1:9359447-9361833	WT	18	OK	0.969379	2.18225	1.17068	1.90917	0.0019	0.0137362	AT1G26970.1	Protein kinase superfamily protein; FUNCTIONS IN: protein serine/threonine kinase activity, protein kinase activity, kinase activity, ATP binding; INVOLVED IN: protein amino acid phosphorylation, N-terminal protein myristoylation; LOCATED IN: chloroplast; CONTAINS InterPro DOMAIN/s: Protein kinase, ATP binding site (InterPro:IPR017441), Protein kinase, catalytic domain (InterPro:IPR000719), Serin…
XLOC_002989	XLOC_002989	AT1G61280,AT1G61290	Chr1:22603120-22606366	WT	18	OK	14.32	32.1942	1.16877	3.07649	5e-05	0.000622834	AT1G61280.1	Phosphatidylinositol N-acetylglucosaminyltransferase, GPI19/PIG-P subunit; CONTAINS InterPro DOMAIN/s: PIG-P (InterPro:IPR013717), Phosphatidylinositol N-acetylglucosaminyltransferase, GPI19/PIG-P subunit (InterPro:IPR016542); BEST Arabidopsis thaliana protein match is: Phosphatidylinositol N-acetylglucosaminyltransferase, GPI19/PIG-P subunit (TAIR:AT2G39445.1); Has 327 Blast hits to 327 proteins…
XLOC_009993	XLOC_009993	AT2G38823,AT2G38830	Chr2:16224042-16226872	WT	18	OK	20.4773	46.0259	1.16842	4.10114	5e-05	0.000622834	AT2G38823.1	unknown protein; BEST Arabidopsis thaliana protein match is: unknown protein (TAIR:AT3G54520.1); Has 35333 Blast hits to 34131 proteins in 2444 species: Archae - 798; Bacteria - 22429; Metazoa - 974; Fungi - 991; Plants - 531; Viruses - 0; Other Eukaryotes - 9610 (source: NCBI BLink).
XLOC_017328	XLOC_017328	AT3G22740	Chr3:8032958-8035809	WT	18	OK	2.58077	5.79043	1.16587	2.87207	0.0001	0.00115693	AT3G22740.1	homocysteine S-methyltransferase (HMT3)
XLOC_004776	XLOC_004776	AT1G15385	Chr1:5292755-5293265	WT	18	OK	35.9883	80.7351	1.16567	5.34309	5e-05	0.000622834	AT1G15385.1	unknown protein; CONTAINS InterPro DOMAIN/s: Protein of unknown function DUF761, plant (InterPro:IPR008480); Has 6 Blast hits to 6 proteins in 3 species: Archae - 0; Bacteria - 0; Metazoa - 0; Fungi - 0; Plants - 6; Viruses - 0; Other Eukaryotes - 0 (source: NCBI BLink).
XLOC_009107	XLOC_009107	AT2G22680	Chr2:9645312-9647613	WT	18	OK	11.7048	26.2211	1.16363	4.37346	5e-05	0.000622834	AT2G22680.1	Zinc finger (C3HC4-type RING finger) family protein; FUNCTIONS IN: ubiquitin-protein ligase activity, zinc ion binding; EXPRESSED IN: 13 plant structures; EXPRESSED DURING: 6 growth stages; CONTAINS InterPro DOMAIN/s: Zinc finger, RING-type (InterPro:IPR001841), Zinc finger, C3HC4 RING-type (InterPro:IPR018957), von Willebrand factor, type A (InterPro:IPR002035); BEST Arabidopsis thaliana protein…
XLOC_000740	XLOC_000740	AT1G15630	Chr1:5376792-5378027	WT	18	OK	3.97746	8.90188	1.16226	3.29128	5e-05	0.000622834	AT1G15630.1	unknown protein; BEST Arabidopsis thaliana protein match is: unknown protein (TAIR:AT1G15610.1); Has 122 Blast hits to 122 proteins in 14 species: Archae - 0; Bacteria - 0; Metazoa - 0; Fungi - 0; Plants - 122; Viruses - 0; Other Eukaryotes - 0 (source: NCBI BLink).
XLOC_029591	XLOC_029591	AT5G38100	Chr5:15198467-15204265	WT	18	OK	1.35987	3.04257	1.16182	2.01842	0.0011	0.00879749	AT5G38100.1	S-adenosyl-L-methionine-dependent methyltransferases superfamily protein; FUNCTIONS IN: methyltransferase activity; INVOLVED IN: biological_process unknown; LOCATED IN: cellular_component unknown; CONTAINS InterPro DOMAIN/s: SAM dependent carboxyl methyltransferase (InterPro:IPR005299); BEST Arabidopsis thaliana protein match is: S-adenosyl-L-methionine-dependent methyltransferases superfamily pr…
XLOC_010602	XLOC_010602	AT2G02930	Chr2:849827-852366	WT	18	OK	3.44371	7.70093	1.16107	1.92212	0.0006	0.00536361	AT2G02930.1	Encodes glutathione transferase belonging to the phi class of GSTs. Naming convention according to Wagner et al. (2002).
XLOC_003835	XLOC_003835	AT1G77570	Chr1:29143349-29147612	WT	18	OK	6.45779	14.4409	1.16105	2.58187	0.0021	0.0148876	AT1G77570.1	Winged helix-turn-helix transcription repressor DNA-binding; FUNCTIONS IN: DNA binding, sequence-specific DNA binding transcription factor activity; INVOLVED IN: regulation of transcription, DNA-dependent; LOCATED IN: endomembrane system, nucleus; EXPRESSED IN: 13 plant structures; EXPRESSED DURING: 6 growth stages; CONTAINS InterPro DOMAIN/s: Winged helix-turn-helix transcription repressor DNA-b…
XLOC_013633	XLOC_013633	AT3G12510	Chr3:3967094-3972101	WT	18	OK	27.189	60.7919	1.16086	3.66288	5e-05	0.000622834	AT3G12510.1	MADS-box family protein; BEST Arabidopsis thaliana protein match is: MADS-box transcription factor family protein (TAIR:AT5G38620.1); Has 66 Blast hits to 66 proteins in 9 species: Archae - 0; Bacteria - 1; Metazoa - 0; Fungi - 0; Plants - 65; Viruses - 0; Other Eukaryotes - 0 (source: NCBI BLink).
XLOC_026732	XLOC_026732	AT5G49770	Chr5:20222668-20227497	WT	18	OK	5.79749	12.952	1.15967	3.8658	5e-05	0.000622834	AT5G49770.1	Leucine-rich repeat protein kinase family protein; FUNCTIONS IN: protein serine/threonine kinase activity, protein kinase activity, ATP binding; INVOLVED IN: transmembrane receptor protein tyrosine kinase signaling pathway, protein amino acid phosphorylation; LOCATED IN: endomembrane system; EXPRESSED IN: sperm cell, root; CONTAINS InterPro DOMAIN/s: Protein kinase, ATP binding site (InterPro:IPR…
XLOC_020698	XLOC_020698	AT4G19970	Chr4:10818241-10825381	WT	18	OK	0.588687	1.31487	1.15935	2.03516	0.00215	0.0151441	AT4G19970.1	CONTAINS InterPro DOMAIN/s: Nucleotide-diphospho-sugar transferase, predicted (InterPro:IPR005069); BEST Arabidopsis thaliana protein match is: Nucleotide-diphospho-sugar transferase family protein (TAIR:AT5G44820.1); Has 801 Blast hits to 466 proteins in 35 species: Archae - 0; Bacteria - 0; Metazoa - 2; Fungi - 0; Plants - 750; Viruses - 0; Other Eukaryotes - 49 (source: NCBI BLink).
XLOC_007154	XLOC_007154	AT1G67000	Chr1:25003958-25007748	WT	18	OK	0.947218	2.11428	1.1584	2.15271	0.0006	0.00536361	AT1G67000.1	Protein kinase superfamily protein; FUNCTIONS IN: protein serine/threonine kinase activity, protein kinase activity, kinase activity, ATP binding; INVOLVED IN: protein amino acid phosphorylation; LOCATED IN: endomembrane system; EXPRESSED IN: stem; CONTAINS InterPro DOMAIN/s: Protein kinase, ATP binding site (InterPro:IPR017441), Protein kinase, catalytic domain (InterPro:IPR000719), Serine-threo…
XLOC_024147	XLOC_024147	AT4G40020	Chr4:18553452-18555300	WT	18	OK	3.93419	8.77728	1.15771	3.16172	5e-05	0.000622834	AT4G40020.1	Myosin heavy chain-related protein; BEST Arabidopsis thaliana protein match is: Plant protein of unknown function (DUF827) (TAIR:AT5G16730.1); Has 160438 Blast hits to 85353 proteins in 3205 species: Archae - 2021; Bacteria - 26641; Metazoa - 65466; Fungi - 13044; Plants - 8368; Viruses - 589; Other Eukaryotes - 44309 (source: NCBI BLink).
XLOC_024756	XLOC_024756	AT5G13320	Chr5:4267509-4271051	WT	18	OK	11	24.5291	1.15699	4.2515	5e-05	0.000622834	AT5G13320.1	Encodes an enzyme capable of conjugating amino acids to 4-substituted benzoates. 4-HBA (4-hydroxybenzoic acid) and pABA (4-aminobenzoate) may be targets of the enzyme in Arabidopsis, leading to the production of pABA-Glu, 4HBA-Glu, or other related compounds. This enzyme is involved in disease-resistance signaling. It is required for the accumulation of salicylic acid, activation of defense respo…
XLOC_022259	XLOC_022259	AT4G06746	Chr4:4073238-4074969	WT	18	OK	23.6445	52.6403	1.15466	3.07535	5e-05	0.000622834	AT4G06746.1	encodes a member of the DREB subfamily A-5 of ERF/AP2 transcription factor family (RAP2.9). The protein contains one AP2 domain. There are 16 members in this subfamily including RAP2.1 and RAP2.10.
XLOC_001486	XLOC_001486	AT1G29860	Chr1:10454409-10456007	WT	18	OK	7.7429	17.2147	1.15269	3.0755	5e-05	0.000622834	AT1G29860.1	member of WRKY Transcription Factor; Group II-c
XLOC_003108	XLOC_003108	AT1G63580,AT1G63590	Chr1:23577332-23581115	WT	18	OK	1.23789	2.75146	1.15231	1.77214	0.00985	0.0496863	AT1G63580.1	Encodes a plasma membrane-localized protein with two DUF26 domains and a GPI anchor domain.
XLOC_015065	XLOC_015065	AT3G43250	Chr3:15216712-15217462	WT	18	OK	13.7668	30.5869	1.15172	4.0188	5e-05	0.000622834	AT3G43250.1	Family of unknown function (DUF572) ; CONTAINS InterPro DOMAIN/s: Protein of unknown function DUF572 (InterPro:IPR007590); BEST Arabidopsis thaliana protein match is: Family of unknown function (DUF572) (TAIR:AT2G32050.1); Has 1346 Blast hits to 1149 proteins in 221 species: Archae - 2; Bacteria - 13; Metazoa - 444; Fungi - 243; Plants - 125; Viruses - 0; Other Eukaryotes - 519 (source: NCBI BLin…
XLOC_019671	XLOC_019671	AT4G04540	Chr4:2259579-2262138	WT	18	OK	0.696015	1.54387	1.14936	2.01482	0.0021	0.0148876	AT4G04540.1	Encodes a cysteine-rich receptor-like protein kinase.
XLOC_007200	XLOC_007200	AT1G67710	Chr1:25376677-25379144	WT	18	OK	5.04041	11.1609	1.14685	3.40226	5e-05	0.000622834	AT1G67710.1	Encodes an Arabidopsis response regulator (ARR) protein that acts in concert with other type-B ARRs in the cytokinin signaling pathway.
XLOC_005232	XLOC_005232	AT1G24320	Chr1:8624060-8630971	WT	18	OK	8.10656	17.9329	1.14545	2.88695	5e-05	0.000622834	AT1G24320.1	Six-hairpin glycosidases superfamily protein; FUNCTIONS IN: mannosyl-oligosaccharide glucosidase activity, alpha-glucosidase activity, catalytic activity; INVOLVED IN: oligosaccharide metabolic process; LOCATED IN: cellular_component unknown; EXPRESSED IN: 6 plant structures; EXPRESSED DURING: F mature embryo stage, petal differentiation and expansion stage, D bilateral stage; CONTAINS InterPro D…
XLOC_010922	XLOC_010922	AT2G07711	Chr2:3397157-3399434	WT	18	OK	1.79747	3.95991	1.1395	2.97261	5e-05	0.000622834	AT2G07711.1	pseudogene, similar to NADH dehydrogenase subunit 5, blastp match of 97% identity and 2.2e-244 P-value to GP|1066145|dbj|BAA07176.1||D37958 NADH dehydrogenase subunit 5 {Malus x domestica}
XLOC_023505	XLOC_023505	AT4G27660,AT4G27670	Chr4:13816613-13820241	WT	18	OK	103.172	227.25	1.13923	3.0936	5e-05	0.000622834	AT4G27660.1	unknown protein; BEST Arabidopsis thaliana protein match is: unknown protein (TAIR:AT5G54150.1); Has 115 Blast hits to 109 proteins in 25 species: Archae - 0; Bacteria - 0; Metazoa - 10; Fungi - 0; Plants - 100; Viruses - 0; Other Eukaryotes - 5 (source: NCBI BLink).
XLOC_017947	XLOC_017947	AT3G32030	Chr3:13032347-13035348	WT	18	OK	4.90681	10.7924	1.13715	2.98035	5e-05	0.000622834	AT3G32030.1	Terpenoid cyclases/Protein prenyltransferases superfamily protein; FUNCTIONS IN: lyase activity, magnesium ion binding; INVOLVED IN: metabolic process; CONTAINS InterPro DOMAIN/s: Terpene synthase, metal-binding domain (InterPro:IPR005630), Terpenoid synthase (InterPro:IPR008949), Terpenoid cylases/protein prenyltransferase alpha-alpha toroid (InterPro:IPR008930), Terpene synthase-like (InterPro:…
XLOC_005078	XLOC_005078	AT1G21529	Chr1:7543923-7544678	WT	18	OK	1.55314	3.4149	1.13666	2.0478	0.0063	0.0355177	AT1G21529.1
XLOC_001406	XLOC_001406	AT1G28470	Chr1:10010180-10012198	WT	18	OK	6.63943	14.5965	1.13649	3.68622	5e-05	0.000622834	AT1G28470.1	NAC domain containing protein 10 (NAC010); CONTAINS InterPro DOMAIN/s: No apical meristem (NAM) protein (InterPro:IPR003441); BEST Arabidopsis thaliana protein match is: NAC domain containing protein 73 (TAIR:AT4G28500.1); Has 2334 Blast hits to 2329 proteins in 68 species: Archae - 0; Bacteria - 0; Metazoa - 0; Fungi - 0; Plants - 2334; Viruses - 0; Other Eukaryotes - 0 (source: NCBI BLink).
XLOC_029616	XLOC_029616	AT5G38565	Chr5:15444280-15446412	WT	18	OK	1.13948	2.50468	1.13625	2.07245	0.00135	0.0104169	AT5G38565.1	F-box/FBD-like domains containing protein; CONTAINS InterPro DOMAIN/s: F-box domain, cyclin-like (InterPro:IPR001810), FBD (InterPro:IPR013596), F-box domain, Skp2-like (InterPro:IPR022364), FBD-like (InterPro:IPR006566); BEST Arabidopsis thaliana protein match is: F-box/RNI-like superfamily protein (TAIR:AT5G38570.1); Has 1399 Blast hits to 1333 proteins in 18 species: Archae - 0; Bacteria - 0; …
XLOC_012006	XLOC_012006	AT2G28110	Chr2:11974641-11979837	WT	18	OK	13.4903	29.6116	1.13424	3.08681	5e-05	0.000622834	AT2G28110.1	Homolog to AT5G22940, a member of glycosyltransferase family 47 that is involved in secondary cell wall biosynthesis. It exhibits high sequence similarity to tobacco (Nicotiana plumbaginifolia) pectin glucuronyltransferase. Protein has a domain that shares significant similarity with the pfam03016 domain. It is expressed specifically in developing vessels and fiber cells, and FRA8 is targeted to …
XLOC_029632	XLOC_029632	AT5G38900	Chr5:15569443-15575618	WT	18	OK	12.1507	26.6504	1.13311	2.11133	0.0003	0.0030153	AT5G38900.1	Thioredoxin superfamily protein; FUNCTIONS IN: protein disulfide oxidoreductase activity; INVOLVED IN: defense response to fungus, incompatible interaction; LOCATED IN: cellular_component unknown; EXPRESSED IN: 16 plant structures; EXPRESSED DURING: 10 growth stages; CONTAINS InterPro DOMAIN/s: DSBA oxidoreductase (InterPro:IPR001853), Thioredoxin-like fold (InterPro:IPR012336); Has 2126 Blast hi…
XLOC_016320	XLOC_016320	AT3G04030	Chr3:1042718-1044698	WT	18	OK	10.5588	23.1326	1.13148	3.34441	5e-05	0.000622834	AT3G04030.3	Homeodomain-like superfamily protein; FUNCTIONS IN: sequence-specific DNA binding transcription factor activity; INVOLVED IN: regulation of transcription; EXPRESSED IN: 9 plant structures; EXPRESSED DURING: 4 anthesis, 4 leaf senescence stage, petal differentiation and expansion stage; CONTAINS InterPro DOMAIN/s: Homeodomain-like (InterPro:IPR009057), Myb, DNA-binding (InterPro:IPR014778), Myb-li…
XLOC_026430	XLOC_026430	AT5G44460	Chr5:17917225-17917983	WT	18	OK	5.48455	12.012	1.13103	3.24217	5e-05	0.000622834	AT5G44460.1	calmodulin like 43 (CML43); FUNCTIONS IN: calcium ion binding; INVOLVED IN: response to cadmium ion; EXPRESSED IN: root, cultured cell; CONTAINS InterPro DOMAIN/s: EF-Hand 1, calcium-binding site (InterPro:IPR018247), EF-HAND 2 (InterPro:IPR018249), EF-hand-like domain (InterPro:IPR011992), Calcium-binding EF-hand (InterPro:IPR002048), EF-hand (InterPro:IPR018248); BEST Arabidopsis thaliana prote…
XLOC_022475	XLOC_022475	AT4G09770	Chr4:6154258-6155912	WT	18	OK	5.48335	11.974	1.12678	2.77886	5e-05	0.000622834	AT4G09770.1	TRAF-like family protein; CONTAINS InterPro DOMAIN/s: TRAF-like (InterPro:IPR008974), MATH (InterPro:IPR002083); BEST Arabidopsis thaliana protein match is: TRAF-like family protein (TAIR:AT4G09780.1); Has 830 Blast hits to 669 proteins in 44 species: Archae - 0; Bacteria - 0; Metazoa - 51; Fungi - 0; Plants - 751; Viruses - 0; Other Eukaryotes - 28 (source: NCBI BLink).
XLOC_012789	XLOC_012789	AT2G42330	Chr2:17627230-17634374	WT	18	OK	27.0994	59.0745	1.12428	3.4027	5e-05	0.000622834	AT2G42330.1	GC-rich sequence DNA-binding factor-like protein with Tuftelin interacting domain; FUNCTIONS IN: nucleic acid binding; LOCATED IN: intracellular; EXPRESSED IN: 22 plant structures; EXPRESSED DURING: 13 growth stages; CONTAINS InterPro DOMAIN/s: Tuftelin interacting protein N-terminal (InterPro:IPR022159), D111/G-patch (InterPro:IPR000467); BEST Arabidopsis thaliana protein match is: GC-rich seque…
XLOC_012150	XLOC_012150	AT2G30750	Chr2:13099335-13101413	WT	18	OK	7.7882	16.9521	1.12211	3.7845	5e-05	0.000622834	AT2G30750.1	putative cytochrome P450
XLOC_023746	XLOC_023746	AT4G32208	Chr4:15558526-15562222	WT	18	OK	0.890842	1.93683	1.12046	1.48793	0.00985	0.0496863	AT4G32208.1	heat shock protein 70 (Hsp 70) family protein; FUNCTIONS IN: molecular_function unknown; INVOLVED IN: biological_process unknown; LOCATED IN: cellular_component unknown; CONTAINS InterPro DOMAIN/s: Heat shock protein 70 (InterPro:IPR013126); BEST Arabidopsis thaliana protein match is: mitochondrial HSO70 2 (TAIR:AT5G09590.1); Has 30201 Blast hits to 17322 proteins in 780 species: Archae - 12; Bac…
XLOC_017890	XLOC_017890	AT3G30842	Chr3:12593840-12600432	WT	18	OK	0.856101	1.85791	1.11783	2.55552	5e-05	0.000622834	AT3G30842.1	pleiotropic drug resistance 10 (PDR10); FUNCTIONS IN: nucleoside-triphosphatase activity, ATPase activity, nucleotide binding, ATP binding; INVOLVED IN: drug transmembrane transport; LOCATED IN: membrane; CONTAINS InterPro DOMAIN/s: ATPase, AAA+ type, core (InterPro:IPR003593), ABC transporter-like (InterPro:IPR003439), ABC-2 type transporter (InterPro:IPR013525); BEST Arabidopsis thaliana protei…
XLOC_030824	XLOC_030824	AT5G60800	Chr5:24460782-24462541	WT	18	OK	11.2806	24.4668	1.11698	3.23775	5e-05	0.000622834	AT5G60800.2	Heavy metal transport/detoxification superfamily protein ; FUNCTIONS IN: metal ion binding; INVOLVED IN: metal ion transport; EXPRESSED IN: 21 plant structures; EXPRESSED DURING: 12 growth stages; CONTAINS InterPro DOMAIN/s: Heavy metal transport/detoxification protein (InterPro:IPR006121); BEST Arabidopsis thaliana protein match is: Heavy metal transport/detoxification superfamily protein (TAIR:…
XLOC_002974	XLOC_002974	AT1G61050	Chr1:22486735-22488284	WT	18	OK	1.31499	2.85124	1.11653	2.32781	0.0011	0.00879749	AT1G61050.1	alpha 1,4-glycosyltransferase family protein; FUNCTIONS IN: transferase activity, transferring glycosyl groups, transferase activity; INVOLVED IN: biological_process unknown; LOCATED IN: Golgi stack; CONTAINS InterPro DOMAIN/s: Alpha 1,4-glycosyltransferase conserved region (InterPro:IPR007652), Glycosyltransferase, DXD sugar-binding region (InterPro:IPR007577); BEST Arabidopsis thaliana protein …
XLOC_013201	XLOC_013201	AT3G03190	Chr3:735027-735987	WT	18	OK	3.43387	7.44084	1.11563	2.77226	0.0003	0.0030153	AT3G03190.1	Encodes glutathione transferase belonging to the phi class of GSTs. Naming convention according to Wagner et al. (2002).
XLOC_016032	XLOC_016032	AT3G60970	Chr3:22555576-22562576	WT	18	OK	2.07992	4.50295	1.11434	3.17207	5e-05	0.000622834	AT3G60970.1	member of MRP subfamily
XLOC_026474	XLOC_026474	AT5G44990	Chr5:18163131-18164871	WT	18	OK	4.90011	10.6024	1.11351	2.79627	5e-05	0.000622834	AT5G44990.1	Glutathione S-transferase family protein; CONTAINS InterPro DOMAIN/s: Glutathione S-transferase, predicted (InterPro:IPR016639), Glutathione S-transferase, C-terminal-like (InterPro:IPR010987), Glutathione S-transferase/chloride channel, C-terminal (InterPro:IPR017933), Thioredoxin-like fold (InterPro:IPR012336); BEST Arabidopsis thaliana protein match is: Glutathione S-transferase family protein…
XLOC_029649	XLOC_029649	AT5G39190	Chr5:15692590-15693581	WT	18	OK	12.4966	27.0382	1.11346	3.31839	5e-05	0.000622834	AT5G39190.1	germin-like protein (GLP2a)
XLOC_000554	XLOC_000554	AT1G12010	Chr1:4056206-4057933	WT	18	OK	93.2674	201.753	1.11314	4.32793	5e-05	0.000622834	AT1G12010.1	Encodes a protein that appears to have 1-amino-cyclopropane-1-carboxylic acid oxidase activity based on mutant analyses.
XLOC_023182	XLOC_023182	AT4G21840	Chr4:11586958-11588322	WT	18	OK	11.2345	24.2954	1.11275	2.8148	5e-05	0.000622834	AT4G21840.1	methionine sulfoxide reductase B8 (MSRB8); FUNCTIONS IN: peptide-methionine-(S)-S-oxide reductase activity; INVOLVED IN: oxidation reduction; LOCATED IN: cytosol; EXPRESSED IN: root; CONTAINS InterPro DOMAIN/s: Methionine sulphoxide reductase B (InterPro:IPR002579), Mss4-like (InterPro:IPR011057); BEST Arabidopsis thaliana protein match is: methionine sulfoxide reductase B7 (TAIR:AT4G21830.2); Ha…
XLOC_010407	XLOC_010407	AT2G46430	Chr2:19058007-19061436	WT	18	OK	8.32214	17.9917	1.11231	3.73858	5e-05	0.000622834	AT2G46430.1	cyclic nucleotide gated channel (CNGC4), downstream component of the signaling pathways leading to HR/resistance
XLOC_009311	XLOC_009311	AT2G26130	Chr2:11126675-11129358	WT	18	OK	1.83544	3.96243	1.11026	2.09781	0.0009	0.00748109	AT2G26130.1	RING/U-box protein with C6HC-type zinc finger; FUNCTIONS IN: zinc ion binding; INVOLVED IN: biological_process unknown; LOCATED IN: cellular_component unknown; CONTAINS InterPro DOMAIN/s: Zinc finger, C6HC-type (InterPro:IPR002867); BEST Arabidopsis thaliana protein match is: RING/U-box protein with C6HC-type zinc finger (TAIR:AT2G26135.1); Has 35333 Blast hits to 34131 proteins in 2444 species: …
XLOC_003485	XLOC_003485	AT1G70510	Chr1:26576485-26582431	WT	18	OK	0.88285	1.90561	1.11001	1.90671	0.00705	0.0387132	AT1G70510.1	A member of class I knotted1-like homeobox gene family (together with KNAT1). Similar to the knotted1 (kn1) homeobox gene of maize. KNAT2 acts synergistically with cytokinins and antagonistically with ethylene based on ectopic expression studies in different mutant backgrounds and hormone treatments. In addition, KNAT2 is negatively regulated by AS and YABBY genes. KNAT2 is strongly expressed in …
XLOC_002258	XLOC_002258	AT1G47655	Chr1:17525364-17526306	WT	18	OK	1.31672	2.84197	1.10994	2.0366	0.0075	0.0406372	AT1G47655.1	Dof-type zinc finger DNA-binding family protein; CONTAINS InterPro DOMAIN/s: Zinc finger, Dof-type (InterPro:IPR003851); BEST Arabidopsis thaliana protein match is: Dof-type zinc finger DNA-binding family protein (TAIR:AT5G66940.1); Has 1094 Blast hits to 1089 proteins in 56 species: Archae - 0; Bacteria - 0; Metazoa - 0; Fungi - 0; Plants - 1089; Viruses - 0; Other Eukaryotes - 5 (source: NCBI B…
XLOC_004143	XLOC_004143	AT1G03840	Chr1:967502-970130	WT	18	OK	0.758036	1.63482	1.10879	1.69524	0.00445	0.0271285	AT1G03840.1	MGP is a nuclear-localized putative transcription factor with three zinc finger domains. MGP can interact with three proteins implicated in root patterning: SCR, SHR, and JKD in Y2H assays, and these interactions depend on the first zinc finger in MGP. MGP appears to be a direct transcriptional target of SHR and SCR, based on promoter binding assays, though it is not expressed in the QC, based on…
XLOC_006248	XLOC_006248	AT1G49620	Chr1:18365490-18366559	WT	18	OK	1.58678	3.42183	1.10866	2.02049	0.0058	0.0333092	AT1G49620.1	Kip-related protein (KRP) gene, encodes CDK (cyclin-dependent kinase) inhibitor (CKI), negative regulator of cell division. A member of seven KRP genes found in Arabidopsis thaliana. Differential expression patterns for distinct KRPs were revealed by in situ hybridization. Binds to D type cyclins and may inhibit cell cycle.
XLOC_030255	XLOC_030255	AT5G49665	Chr5:20167001-20169474	WT	18	OK	10.0528	21.6318	1.10556	4.00187	5e-05	0.000622834	AT5G49665.1	Zinc finger (C3HC4-type RING finger) family protein; FUNCTIONS IN: ubiquitin-protein ligase activity, zinc ion binding; LOCATED IN: plasma membrane; CONTAINS InterPro DOMAIN/s: Zinc finger, RING-type (InterPro:IPR001841), Zinc finger, C3HC4 RING-type (InterPro:IPR018957), von Willebrand factor, type A (InterPro:IPR002035); BEST Arabidopsis thaliana protein match is: Zinc finger (C3HC4-type RING f…
XLOC_009781	XLOC_009781	AT2G34940	Chr2:14740342-14743548	WT	18	OK	1.71199	3.68208	1.10485	2.1186	0.00045	0.00422513	AT2G34940.1	VACUOLAR SORTING RECEPTOR 5 (VSR5); FUNCTIONS IN: calcium ion binding; INVOLVED IN: protein targeting to vacuole; LOCATED IN: integral to plasma membrane, Golgi transport complex; EXPRESSED IN: 14 plant structures; EXPRESSED DURING: 11 growth stages; CONTAINS InterPro DOMAIN/s: Protease-associated PA (InterPro:IPR003137), EGF-like calcium-binding, conserved site (InterPro:IPR018097), EGF-like cal…
XLOC_007045	XLOC_007045	AT1G65150	Chr1:24203840-24205775	WT	18	OK	6.18429	13.3004	1.10479	3.09343	5e-05	0.000622834	AT1G65150.1	TRAF-like family protein; CONTAINS InterPro DOMAIN/s: TRAF-like (InterPro:IPR008974), MATH (InterPro:IPR002083); BEST Arabidopsis thaliana protein match is: TRAF-like superfamily protein (TAIR:AT1G65050.1); Has 512 Blast hits to 426 proteins in 21 species: Archae - 0; Bacteria - 0; Metazoa - 2; Fungi - 4; Plants - 496; Viruses - 0; Other Eukaryotes - 10 (source: NCBI BLink).
XLOC_008787	XLOC_008787	AT2G17040	Chr2:7407122-7408270	WT	18	OK	4.75073	10.2093	1.10366	2.99049	0.00035	0.00345062	AT2G17040.1	Member of the NAC transcription factor family and more specifically, the ONAC022 subfamily. Involved in leaf and inflorescence stem morphogenesis.
XLOC_010924	XLOC_010924	AT2G07712	Chr2:3400729-3402757	WT	18	OK	0.982897	2.10644	1.09969	2.18582	0.001	0.00815767	AT2G07712.1	pseudogene, similar to maturase-related protein, blastp match of 86% identity and 2.9e-305 P-value to GP|840924|gb|AAA67711.1||U09988 maturase-related protein {Glycine max}
XLOC_016642	XLOC_016642	AT3G09950	Chr3:3060089-3060633	WT	18	OK	7.00486	15.0025	1.09877	3.31694	0.00035	0.00345062	AT3G09950.1	unknown protein; BEST Arabidopsis thaliana protein match is: unknown protein (TAIR:AT5G41761.1); Has 128 Blast hits to 128 proteins in 12 species: Archae - 0; Bacteria - 0; Metazoa - 0; Fungi - 0; Plants - 128; Viruses - 0; Other Eukaryotes - 0 (source: NCBI BLink).
XLOC_012729	XLOC_012729	AT2G41240	Chr2:17198281-17199320	WT	18	OK	67.5231	144.582	1.09843	3.92973	5e-05	0.000622834	AT2G41240.1	Encodes a member of the basic helix-loop-helix transcription factor family protein.
XLOC_019687	XLOC_019687	AT4G04830	Chr4:2445793-2447086	WT	18	OK	28.7832	61.6247	1.09828	3.54561	5e-05	0.000622834	AT4G04830.1	methionine sulfoxide reductase B5 (MSRB5); FUNCTIONS IN: peptide-methionine-(S)-S-oxide reductase activity; INVOLVED IN: oxidation reduction; LOCATED IN: cytosol; EXPRESSED IN: 24 plant structures; EXPRESSED DURING: 14 growth stages; CONTAINS InterPro DOMAIN/s: Methionine sulphoxide reductase B (InterPro:IPR002579), Mss4-like (InterPro:IPR011057); BEST Arabidopsis thaliana protein match is: methi…
XLOC_024883	XLOC_024883	AT5G15830	Chr5:5168542-5169361	WT	18	OK	19.7938	42.3659	1.09785	4.14279	5e-05	0.000622834	AT5G15830.1	basic leucine-zipper 3 (bZIP3); FUNCTIONS IN: DNA binding, sequence-specific DNA binding transcription factor activity; INVOLVED IN: regulation of transcription, DNA-dependent; EXPRESSED IN: 9 plant structures; EXPRESSED DURING: 6 growth stages; CONTAINS InterPro DOMAIN/s: Basic-leucine zipper (bZIP) transcription factor (InterPro:IPR004827), bZIP transcription factor, bZIP-1 (InterPro:IPR011616)…
XLOC_003297	XLOC_003297	AT1G67100	Chr1:25053733-25054847	WT	18	OK	4.2561	9.10383	1.09694	2.90585	0.00015	0.00165462	AT1G67100.1	LOB domain-containing protein 40 (LBD40); CONTAINS InterPro DOMAIN/s: Lateral organ boundaries, LOB (InterPro:IPR004883); BEST Arabidopsis thaliana protein match is: LOB domain-containing protein 41 (TAIR:AT3G02550.1); Has 635 Blast hits to 634 proteins in 26 species: Archae - 0; Bacteria - 0; Metazoa - 0; Fungi - 0; Plants - 635; Viruses - 0; Other Eukaryotes - 0 (source: NCBI BLink).
XLOC_003278	XLOC_003278	AT1G66730	Chr1:24884680-24892046	WT	18	OK	3.14348	6.72245	1.09663	3.57202	5e-05	0.000622834	AT1G66730.1	Encodes a novel plant specific DNA ligase that is involved in seed germination and DNA repair.
XLOC_009437	XLOC_009437	AT2G28570	Chr2:12241671-12242729	WT	18	OK	177.352	378.999	1.09558	3.96819	5e-05	0.000622834	AT2G28570.1	unknown protein; Has 13 Blast hits to 13 proteins in 6 species: Archae - 0; Bacteria - 0; Metazoa - 0; Fungi - 0; Plants - 13; Viruses - 0; Other Eukaryotes - 0 (source: NCBI BLink).
XLOC_011809	XLOC_011809	AT2G24700	Chr2:10513015-10515411	WT	18	OK	4.09981	8.75606	1.09473	3.19223	5e-05	0.000622834	AT2G24700.1	Transcriptional factor B3 family protein; FUNCTIONS IN: DNA binding, sequence-specific DNA binding transcription factor activity; INVOLVED IN: regulation of transcription, DNA-dependent; LOCATED IN: cellular_component unknown; CONTAINS InterPro DOMAIN/s: Transcriptional factor B3 (InterPro:IPR003340); BEST Arabidopsis thaliana protein match is: Transcriptional factor B3 family protein (TAIR:AT4G0…
XLOC_015854	XLOC_015854	AT3G57380	Chr3:21229801-21231729	WT	18	OK	11.9355	25.4851	1.0944	4.02124	5e-05	0.000622834	AT3G57380.1	Glycosyltransferase family 61 protein; FUNCTIONS IN: transferase activity, transferring glycosyl groups; INVOLVED IN: biological_process unknown; LOCATED IN: cellular_component unknown; EXPRESSED IN: stem, flower, stamen; EXPRESSED DURING: 4 anthesis; CONTAINS InterPro DOMAIN/s: Glycosyltransferase AER61, uncharacterised (InterPro:IPR007657); BEST Arabidopsis thaliana protein match is: Glycosyltr…
XLOC_005536	XLOC_005536	AT1G31050	Chr1:11075626-11079240	WT	18	OK	8.38082	17.8868	1.09373	3.73228	5e-05	0.000622834	AT1G31050.1	basic helix-loop-helix (bHLH) DNA-binding superfamily protein; FUNCTIONS IN: sequence-specific DNA binding transcription factor activity; INVOLVED IN: regulation of transcription; LOCATED IN: nucleus; EXPRESSED IN: sperm cell, hypocotyl, root; CONTAINS InterPro DOMAIN/s: Helix-loop-helix DNA-binding (InterPro:IPR011598); BEST Arabidopsis thaliana protein match is: basic helix-loop-helix (bHLH) DN…
XLOC_009445	XLOC_009445	AT2G28710	Chr2:12322385-12323584	WT	18	OK	3.15544	6.73194	1.09318	2.50885	0.00165	0.0121901	AT2G28710.1	C2H2-type zinc finger family protein; FUNCTIONS IN: sequence-specific DNA binding transcription factor activity, zinc ion binding, nucleic acid binding; INVOLVED IN: regulation of transcription; LOCATED IN: intracellular; EXPRESSED IN: 8 plant structures; EXPRESSED DURING: 4 anthesis; CONTAINS InterPro DOMAIN/s: Zinc finger, C2H2-like (InterPro:IPR015880), Zinc finger, C2H2-type (InterPro:IPR0070…
XLOC_020226	XLOC_020226	AT4G11655	Chr4:7038584-7039923	WT	18	OK	2.69819	5.74639	1.09067	2.60831	0.00145	0.0110189	AT4G11655.1	Uncharacterised protein family (UPF0497); CONTAINS InterPro DOMAIN/s: Uncharacterised protein family UPF0497, trans-membrane plant (InterPro:IPR006702); BEST Arabidopsis thaliana protein match is: Uncharacterised protein family (UPF0497) (TAIR:AT2G36330.1); Has 35333 Blast hits to 34131 proteins in 2444 species: Archae - 798; Bacteria - 22429; Metazoa - 974; Fungi - 991; Plants - 531; Viruses - 0…
XLOC_008612	XLOC_008612	AT2G14210	Chr2:6018557-6027028	WT	18	OK	76.9818	163.895	1.09018	4.22727	5e-05	0.000622834	AT2G14210.1	MADS box gene, transcription factor
XLOC_011708	XLOC_011708	AT2G23030	Chr2:9803491-9806700	WT	18	OK	8.36723	17.8124	1.09006	3.71634	5e-05	0.000622834	AT2G23030.1	encodes a member of SNF1-related protein kinases (SnRK2)
XLOC_019501	XLOC_019501	AT4G02390	Chr4:1048024-1054105	WT	18	OK	3.42416	7.27883	1.08796	2.9622	5e-05	0.000622834	AT4G02390.1	Encodes a DNA dependent nuclear poly (ADP-ribose) polymerase (E.C.2.4.2.30), thought to be involved in post-translational modification .
XLOC_029996	XLOC_029996	AT5G45090	Chr5:18202654-18205000	WT	18	OK	3.54468	7.52534	1.0861	2.37406	0.0001	0.00115693	AT5G45090.1	phloem protein 2-A7 (PP2-A7); FUNCTIONS IN: carbohydrate binding; INVOLVED IN: signal transduction, defense response, innate immune response; LOCATED IN: intrinsic to membrane; EXPRESSED IN: 7 plant structures; EXPRESSED DURING: 4 anthesis, F mature embryo stage, 4 leaf senescence stage; CONTAINS InterPro DOMAIN/s: Toll-Interleukin receptor (InterPro:IPR000157); BEST Arabidopsis thaliana protein …
XLOC_000238	XLOC_000238	AT1G05880	Chr1:1775484-1779143	WT	18	OK	4.51129	9.577	1.08603	3.00424	5e-05	0.000622834	AT1G05880.2	Encodes ARI12 (ARIADNE 12). ARI12 belongs to a family of ?RING between RING fingers' (RBR) domain proteins with E3 ligase activity. Expression of ARI12 is induced by UV-B exposure.
XLOC_000691	XLOC_000691	AT1G14630	Chr1:5019954-5021537	WT	18	OK	1.57411	3.34131	1.08588	2.1079	0.0085	0.0445551	AT1G14630.1	unknown protein; BEST Arabidopsis thaliana protein match is: unknown protein (TAIR:AT2G01990.1); Has 125 Blast hits to 123 proteins in 14 species: Archae - 0; Bacteria - 0; Metazoa - 0; Fungi - 0; Plants - 125; Viruses - 0; Other Eukaryotes - 0 (source: NCBI BLink).
XLOC_006870	XLOC_006870	AT1G61750	Chr1:22804414-22806367	WT	18	OK	9.9572	21.1202	1.08481	3.3352	5e-05	0.000622834	AT1G61750.1	Receptor-like protein kinase-related family protein; FUNCTIONS IN: molecular_function unknown; INVOLVED IN: biological_process unknown; LOCATED IN: endomembrane system; EXPRESSED IN: root; CONTAINS InterPro DOMAIN/s: Protein of unknown function DUF26 (InterPro:IPR002902); BEST Arabidopsis thaliana protein match is: Receptor-like protein kinase-related family protein (TAIR:AT1G63590.1); Has 1543 B…
XLOC_021614	XLOC_021614	AT4G37430	Chr4:17597109-17598958	WT	18	OK	5.67986	12.0468	1.08472	2.9501	5e-05	0.000622834	AT4G37430.1	Encodes a member of the CYP81F cytochrome P450 monooxygenase subfamily.
XLOC_026199	XLOC_026199	AT5G40690	Chr5:16290395-16291583	WT	18	OK	33.2161	70.3966	1.08363	3.68079	5e-05	0.000622834	AT5G40690.1	CONTAINS InterPro DOMAIN/s: EF-Hand 1, calcium-binding site (InterPro:IPR018247); BEST Arabidopsis thaliana protein match is: unknown protein (TAIR:AT2G41730.1); Has 1807 Blast hits to 1807 proteins in 277 species: Archae - 0; Bacteria - 0; Metazoa - 736; Fungi - 347; Plants - 385; Viruses - 0; Other Eukaryotes - 339 (source: NCBI BLink).
XLOC_019686	XLOC_019686	AT4G04800,AT4G04810	Chr4:2439545-2442771	WT	18	OK	24.0977	51.0452	1.08288	2.92466	5e-05	0.000622834	AT4G04800.1	methionine sulfoxide reductase B3 (MSRB3); FUNCTIONS IN: peptide-methionine-(S)-S-oxide reductase activity; INVOLVED IN: oxidation reduction; LOCATED IN: nucleus; EXPRESSED IN: 23 plant structures; EXPRESSED DURING: 15 growth stages; CONTAINS InterPro DOMAIN/s: Methionine sulphoxide reductase B (InterPro:IPR002579), Mss4-like (InterPro:IPR011057); BEST Arabidopsis thaliana protein match is: methi…
XLOC_013255	XLOC_013255	AT3G04420	Chr3:1172745-1174467	WT	18	OK	5.51693	11.684	1.08259	2.86126	5e-05	0.000622834	AT3G04420.1	NAC domain containing protein 48 (NAC048); FUNCTIONS IN: sequence-specific DNA binding transcription factor activity; INVOLVED IN: multicellular organismal development, regulation of transcription; LOCATED IN: cellular_component unknown; EXPRESSED IN: stem; CONTAINS InterPro DOMAIN/s: No apical meristem (NAM) protein (InterPro:IPR003441); BEST Arabidopsis thaliana protein match is: NAC domain con…
XLOC_020390	XLOC_020390	AT4G14630	Chr4:8392840-8393813	WT	18	OK	236.669	501.114	1.08227	4.52834	5e-05	0.000622834	AT4G14630.1	germin-like protein with N-terminal signal sequence that may target it to the vacuole, plasma membrane and/or outside the cell.
XLOC_020053	XLOC_020053	AT4G09110	Chr4:5812487-5813396	WT	18	OK	5.92029	12.5321	1.08189	3.14595	5e-05	0.000622834	AT4G09110.1	RING/U-box superfamily protein; FUNCTIONS IN: zinc ion binding; LOCATED IN: endomembrane system; CONTAINS InterPro DOMAIN/s: Zinc finger, RING-type (InterPro:IPR001841), Zinc finger, C3HC4 RING-type (InterPro:IPR018957); BEST Arabidopsis thaliana protein match is: RING/U-box superfamily protein (TAIR:AT4G09120.1); Has 9318 Blast hits to 9279 proteins in 280 species: Archae - 0; Bacteria - 2; Meta…
XLOC_005152	XLOC_005152	AT1G22985	Chr1:8135212-8135920	WT	18	OK	23.8074	50.3839	1.08156	4.2871	5e-05	0.000622834	AT1G22985.1	encodes a member of the ERF (ethylene response factor) subfamily B-5 of ERF/AP2 transcription factor family. The protein contains one AP2 domain. There are 7 members in this subfamily.
XLOC_015170	XLOC_015170	AT3G44540	Chr3:16123808-16128027	WT	18	OK	9.07103	19.1953	1.08142	3.43925	5e-05	0.000622834	AT3G44540.1	Encodes a member of the eight-member gene family encoding alcohol-forming fatty acyl-CoA reductases (FARs) identified in Arabidopsis thaliana. Three of the FARs, FAR1 (At5g22500), FAR4 (At3g44540) and FAR5 (At3g44550), are shown to generate the fatty alcohols found in root, seed coat, and wound-induced leaf tissue.
XLOC_010068	XLOC_010068	AT2G40240	Chr2:16811025-16812228	WT	18	OK	1.73977	3.67695	1.07961	2.31923	0.00195	0.0140283	AT2G40240.1	Tetratricopeptide repeat (TPR)-like superfamily protein; CONTAINS InterPro DOMAIN/s: Pentatricopeptide repeat (InterPro:IPR002885); BEST Arabidopsis thaliana protein match is: Tetratricopeptide repeat (TPR)-like superfamily protein (TAIR:AT3G56030.1); Has 20269 Blast hits to 5655 proteins in 178 species: Archae - 0; Bacteria - 4; Metazoa - 127; Fungi - 39; Plants - 19817; Viruses - 0; Other Eukar…
XLOC_000694	XLOC_000694	AT1G14680	Chr1:5040860-5041733	WT	18	OK	1.75107	3.6979	1.07847	2.05832	0.00365	0.0230693	AT1G14680.1	unknown protein; BEST Arabidopsis thaliana protein match is: unknown protein (TAIR:AT4G09060.1); Has 8132 Blast hits to 6366 proteins in 685 species: Archae - 171; Bacteria - 671; Metazoa - 4046; Fungi - 445; Plants - 318; Viruses - 23; Other Eukaryotes - 2458 (source: NCBI BLink).
XLOC_002368	XLOC_002368	AT1G49470	Chr1:18310493-18311634	WT	18	OK	3.38542	7.1415	1.07689	2.94331	0.00025	0.00258687	AT1G49470.1	Family of unknown function (DUF716) ; FUNCTIONS IN: molecular_function unknown; INVOLVED IN: biological_process unknown; LOCATED IN: endomembrane system; EXPRESSED IN: 20 plant structures; EXPRESSED DURING: 10 growth stages; CONTAINS InterPro DOMAIN/s: Protein of unknown function DUF716 (InterPro:IPR006904); BEST Arabidopsis thaliana protein match is: Family of unknown function (DUF716) (TAIR:AT1…
XLOC_030155	XLOC_030155	AT5G47920	Chr5:19403172-19404088	WT	18	OK	9.44894	19.911	1.07534	3.60669	5e-05	0.000622834	AT5G47920.1	unknown protein; BEST Arabidopsis thaliana protein match is: unknown protein (TAIR:AT5G13880.1); Has 1807 Blast hits to 1807 proteins in 277 species: Archae - 0; Bacteria - 0; Metazoa - 736; Fungi - 347; Plants - 385; Viruses - 0; Other Eukaryotes - 339 (source: NCBI BLink).
XLOC_029641	XLOC_029641	AT5G39130	Chr5:15665256-15666669	WT	18	OK	7.54544	15.8889	1.07435	2.82206	5e-05	0.000622834	AT5G39130.1	RmlC-like cupins superfamily protein; FUNCTIONS IN: manganese ion binding, nutrient reservoir activity; INVOLVED IN: biological_process unknown; LOCATED IN: endomembrane system, apoplast; CONTAINS InterPro DOMAIN/s: Cupin, RmlC-type (InterPro:IPR011051), Cupin 1 (InterPro:IPR006045), RmlC-like jelly roll fold (InterPro:IPR014710), Germin (InterPro:IPR001929), Germin, manganese binding site (Inter…
XLOC_030751	XLOC_030751	AT5G59260	Chr5:23907757-23910237	WT	18	OK	1.26761	2.66747	1.07336	2.14201	0.001	0.00815767	AT5G59260.1	Concanavalin A-like lectin protein kinase family protein; FUNCTIONS IN: protein serine/threonine kinase activity, binding, protein kinase activity, kinase activity, ATP binding; INVOLVED IN: protein amino acid phosphorylation; LOCATED IN: endomembrane system; EXPRESSED IN: hypocotyl, root, stamen; EXPRESSED DURING: 4 anthesis; CONTAINS InterPro DOMAIN/s: Legume lectin, beta chain (InterPro:IPR001…
XLOC_027528	XLOC_027528	AT5G64690	Chr5:25858469-25866927	WT	18	OK	8.74316	18.3406	1.06882	2.88496	5e-05	0.000622834	AT5G64690.1	neurofilament triplet H protein-related; Has 1807 Blast hits to 1807 proteins in 277 species: Archae - 0; Bacteria - 0; Metazoa - 736; Fungi - 347; Plants - 385; Viruses - 0; Other Eukaryotes - 339 (source: NCBI BLink).
XLOC_009607	XLOC_009607	AT2G31945	Chr2:13581580-13582126	WT	18	OK	5.00612	10.4958	1.06804	2.97294	0.00125	0.00979176	AT2G31945.1	unknown protein; FUNCTIONS IN: molecular_function unknown; INVOLVED IN: biological_process unknown; LOCATED IN: endomembrane system; EXPRESSED IN: 8 plant structures; EXPRESSED DURING: 4 anthesis, petal differentiation and expansion stage; BEST Arabidopsis thaliana protein match is: unknown protein (TAIR:AT1G05575.1); Has 61 Blast hits to 61 proteins in 10 species: Archae - 0; Bacteria - 0; Metaz…
XLOC_013798	XLOC_013798	AT3G15500	Chr3:5234616-5236088	WT	18	OK	11.4132	23.9061	1.06667	3.75723	5e-05	0.000622834	AT3G15500.1	Encodes an ATAF-like NAC-domain transcription factor that doesn't contain C-terminal sequences shared by CUC1, CUC2 and NAM. Note: this protein (AtNAC3) is not to be confused with the protein encoded by locus AT3G29035, which, on occasion, has also been referred to as AtNAC3.
XLOC_008713	XLOC_008713	AT2G15620	Chr2:6810475-6812939	WT	18	OK	193.787	405.46	1.06509	3.01371	5e-05	0.000622834	AT2G15620.1	Involved in the second step of nitrate assimilation. Its expression is induced by nitrate.
XLOC_018831	XLOC_018831	AT3G54270	Chr3:20086957-20089846	WT	18	OK	2.81568	5.88809	1.06432	2.55817	5e-05	0.000622834	AT3G54270.1	sucrose-6F-phosphate phosphohydrolase family protein; FUNCTIONS IN: phosphatase activity, magnesium ion binding, sucrose-phosphatase activity, catalytic activity; INVOLVED IN: sucrose biosynthetic process, metabolic process; EXPRESSED IN: 7 plant structures; EXPRESSED DURING: petal differentiation and expansion stage, E expanded cotyledon stage, D bilateral stage; CONTAINS InterPro DOMAIN/s: Sucr…
XLOC_008830	XLOC_008830	AT2G17787	Chr2:7731074-7733019	WT	18	OK	9.64312	20.1611	1.064	3.69534	5e-05	0.000622834	AT2G17787.1	unknown protein; BEST Arabidopsis thaliana protein match is: unknown protein (TAIR:AT4G35940.2); Has 35333 Blast hits to 34131 proteins in 2444 species: Archae - 798; Bacteria - 22429; Metazoa - 974; Fungi - 991; Plants - 531; Viruses - 0; Other Eukaryotes - 9610 (source: NCBI BLink).
XLOC_010082	XLOC_010082	AT2G40520	Chr2:16922586-16925914	WT	18	OK	0.506273	1.05841	1.06391	1.25316	0.0075	0.0406372	AT2G40520.1	Nucleotidyltransferase family protein; FUNCTIONS IN: nucleotidyltransferase activity; INVOLVED IN: biological_process unknown; LOCATED IN: cellular_component unknown; CONTAINS InterPro DOMAIN/s: Nucleotidyl transferase domain (InterPro:IPR002934); BEST Arabidopsis thaliana protein match is: PAP/OAS1 substrate-binding domain superfamily (TAIR:AT3G56320.1); Has 333 Blast hits to 325 proteins in 98 …
XLOC_012125	XLOC_012125	AT2G30350	Chr2:12934149-12935773	WT	18	OK	3.47823	7.27053	1.06371	2.37127	0.0001	0.00115693	AT2G30350.2	Excinuclease ABC, C subunit, N-terminal; FUNCTIONS IN: nuclease activity; INVOLVED IN: DNA repair; LOCATED IN: intracellular; EXPRESSED IN: 24 plant structures; EXPRESSED DURING: 15 growth stages; CONTAINS InterPro DOMAIN/s: Excinuclease ABC, C subunit, N-terminal (InterPro:IPR000305); Has 35333 Blast hits to 34131 proteins in 2444 species: Archae - 798; Bacteria - 22429; Metazoa - 974; Fungi - 9…
XLOC_010258	XLOC_010258	AT2G43820	Chr2:18152226-18153908	WT	18	OK	23.1949	48.4465	1.06259	4.15777	5e-05	0.000622834	AT2G43820.1	Induced by Salicylic acid, virus, fungus and bacteria.Involved in the tryptophan synthesis pathway. Independent of NPR1 for their induction by salicylic acid. UGT74F1 transfers UDP:glucose to salicylic acid (forming a glucoside (SAG) and a glucose ester (SGE)), benzoic acid, and athranilate in vitro. UGT74F2 shows a weak ability to catalyze the formation of the p-aminobenzoate-glucose ester in vi…
XLOC_013316	XLOC_013316	AT3G05630	Chr3:1635199-1643253	WT	18	OK	3.67223	7.66893	1.06237	2.92614	5e-05	0.000622834	AT3G05630.1	Encodes a member of the PXPH-PLD subfamily of phospholipase D proteins. Regulates vesicle trafficking. Required for auxin transport and distribution and hence auxin responses. This subfamily is novel structurally different from the majority of plant PLDs by having phox homology (PX) and pleckstrin homology (PH) domains. Involved regulating root development in response to nutrient limitation. Play…
XLOC_003282	XLOC_003282	AT1G66780	Chr1:24909082-24911648	WT	18	OK	1.85613	3.87608	1.0623	2.25803	0.0006	0.00536361	AT1G66780.1	MATE efflux family protein; FUNCTIONS IN: antiporter activity, drug transmembrane transporter activity, transporter activity; INVOLVED IN: drug transmembrane transport, transmembrane transport; LOCATED IN: membrane; EXPRESSED IN: 14 plant structures; EXPRESSED DURING: 9 growth stages; CONTAINS InterPro DOMAIN/s: Multi antimicrobial extrusion protein MatE (InterPro:IPR002528); BEST Arabidopsis tha…
XLOC_014614	XLOC_014614	AT3G29430	Chr3:11311355-11312792	WT	18	OK	1.92048	4.0063	1.0608	2.34427	0.0005	0.00460825	AT3G29430.1	Terpenoid synthases superfamily protein; INVOLVED IN: isoprenoid biosynthetic process; EXPRESSED IN: root; CONTAINS InterPro DOMAIN/s: Polyprenyl synthetase-related (InterPro:IPR017446), Terpenoid synthase (InterPro:IPR008949), Polyprenyl synthetase (InterPro:IPR000092); BEST Arabidopsis thaliana protein match is: Terpenoid synthases superfamily protein (TAIR:AT3G32040.1); Has 16721 Blast hits to…
XLOC_015472	XLOC_015472	AT3G49940	Chr3:18514108-18516201	WT	18	OK	18.5054	38.5732	1.05965	3.45629	5e-05	0.000622834	AT3G49940.1	LOB domain-containing protein 38 (LBD38); CONTAINS InterPro DOMAIN/s: Lateral organ boundaries, LOB (InterPro:IPR004883); BEST Arabidopsis thaliana protein match is: LOB domain-containing protein 37 (TAIR:AT5G67420.1); Has 581 Blast hits to 580 proteins in 26 species: Archae - 0; Bacteria - 0; Metazoa - 0; Fungi - 0; Plants - 581; Viruses - 0; Other Eukaryotes - 0 (source: NCBI BLink).
XLOC_018377	XLOC_018377	AT3G46080	Chr3:16922752-16923247	WT	18	OK	28.2095	58.7987	1.05961	4.72024	5e-05	0.000622834	AT3G46080.1	C2H2-type zinc finger family protein; FUNCTIONS IN: sequence-specific DNA binding transcription factor activity, zinc ion binding, nucleic acid binding; INVOLVED IN: response to chitin, regulation of transcription; LOCATED IN: intracellular; CONTAINS InterPro DOMAIN/s: Zinc finger, C2H2-like (InterPro:IPR015880), Zinc finger, C2H2-type (InterPro:IPR007087); BEST Arabidopsis thaliana protein match…
XLOC_014114	XLOC_014114	AT3G21000	Chr3:7363892-7365524	WT	18	OK	2.09423	4.35982	1.05785	2.11657	0.00035	0.00345062	AT3G21000.1	Gag-Pol-related retrotransposon family protein; BEST Arabidopsis thaliana protein match is: Gag-Pol-related retrotransposon family protein (TAIR:AT3G20980.1); Has 830 Blast hits to 808 proteins in 47 species: Archae - 0; Bacteria - 0; Metazoa - 29; Fungi - 57; Plants - 743; Viruses - 0; Other Eukaryotes - 1 (source: NCBI BLink).
XLOC_004971	XLOC_004971	AT1G19660	Chr1:6799980-6802685	WT	18	OK	24.4757	50.9475	1.05766	3.67764	5e-05	0.000622834	AT1G19660.1	Wound-responsive family protein; FUNCTIONS IN: DNA binding, nuclease activity; INVOLVED IN: response to wounding, nucleotide-excision repair; EXPRESSED IN: ovule; CONTAINS InterPro DOMAIN/s: Protein of unknown function DUF151 (InterPro:IPR003729), UvrB/UvrC protein (InterPro:IPR001943); BEST Arabidopsis thaliana protein match is: bifunctional nuclease in basal defense response 1 (TAIR:AT1G75380.3…
XLOC_026241	XLOC_026241	AT5G41410	Chr5:16580043-16584008	WT	18	OK	1.42496	2.96359	1.05642	2.52868	0.00015	0.00165462	AT5G41410.1	Homeodomain protein required for ovule identity.Loss of function mutations show homeotic conversion of integuments to carpels.Forms heterodimers with STM and KNAT1. Interacts with AG-SEP heterodimers is thought to restrict WUS expression. BEL interacts with MADS box dimers composed of SEP1(or SEP3) and AG, SHP1, SHP2 and STK. The interaction of BEL1 with AG-SEP3 is required for proper integument …
XLOC_006343	XLOC_006343	AT1G51420	Chr1:19064711-19066984	WT	18	OK	39.1493	81.3534	1.05522	3.62322	5e-05	0.000622834	AT1G51420.1	sucrose-phosphatase 1 (SPP1); FUNCTIONS IN: phosphatase activity, magnesium ion binding, sucrose-phosphatase activity, catalytic activity; INVOLVED IN: sucrose biosynthetic process, metabolic process; LOCATED IN: plasma membrane; EXPRESSED IN: petal, leaf whorl, root, flower, cultured cell; EXPRESSED DURING: 4 anthesis, petal differentiation and expansion stage; CONTAINS InterPro DOMAIN/s: Sucros…
XLOC_014635	XLOC_014635	AT3G29670	Chr3:11527871-11529350	WT	18	OK	0.82996	1.72466	1.0552	1.87881	0.00915	0.0471589	AT3G29670.1	Encodes a malonyltransferase that may play a role in phenolic xenobiotic detoxification.
XLOC_009582	XLOC_009582	AT2G31425	Chr2:13393363-13395726	WT	18	OK	3.11492	6.47098	1.05479	1.75569	0.0043	0.0264253	AT2G31425.1	Plant invertase/pectin methylesterase inhibitor superfamily protein; FUNCTIONS IN: enzyme inhibitor activity, pectinesterase activity; INVOLVED IN: biological_process unknown; LOCATED IN: endomembrane system; CONTAINS InterPro DOMAIN/s: Pectinesterase inhibitor (InterPro:IPR006501); BEST Arabidopsis thaliana protein match is: Plant invertase/pectin methylesterase inhibitor superfamily protein (TA…
XLOC_018935	XLOC_018935	AT3G56210	Chr3:20852384-20855610	WT	18	OK	18.2839	37.913	1.05212	3.7182	5e-05	0.000622834	AT3G56210.5	ARM repeat superfamily protein; FUNCTIONS IN: binding; INVOLVED IN: biological_process unknown; CONTAINS InterPro DOMAIN/s: Armadillo-type fold (InterPro:IPR016024).
XLOC_016054	XLOC_016054	AT3G61390,AT3G61400	Chr3:22716098-22720481	WT	18	OK	6.1474	12.7396	1.05127	2.89563	5e-05	0.000622834	AT3G61390.2	RING/U-box superfamily protein; FUNCTIONS IN: ubiquitin-protein ligase activity; INVOLVED IN: protein ubiquitination; LOCATED IN: ubiquitin ligase complex; EXPRESSED IN: 17 plant structures; EXPRESSED DURING: 11 growth stages; CONTAINS InterPro DOMAIN/s: U box domain (InterPro:IPR003613); BEST Arabidopsis thaliana protein match is: U-box domain-containing protein (TAIR:AT2G45920.1); Has 5125 Blas…
XLOC_004212	XLOC_004212	AT1G05055,AT1G05060,AT1G05065	Chr1:1448631-1455319	WT	18	OK	76.5435	158.589	1.05094	3.86322	5e-05	0.000622834	AT1G05055.1	Member of transcription factor TFIIH complex. Involved in transcription and DNA repair and interacts with AtXPD.
XLOC_018406	XLOC_018406	AT3G46530	Chr3:17130317-17133586	WT	18	OK	2.60087	5.38694	1.05047	2.86788	5e-05	0.000622834	AT3G46530.1	Confers resistance to the biotrophic oomycete, Peronospora parasitica. Encodes an NBS-LRR type R protein with a putative amino-terminal leucine zipper. Fungal protein ATR13 induces RPP13 gene expression and disease resistance.
XLOC_007785	XLOC_007785	AT1G79410	Chr1:29867879-29869633	WT	18	OK	3.31079	6.856	1.05019	3.0644	5e-05	0.000622834	AT1G79410.1	organic cation/carnitine transporter5 (5-Oct); FUNCTIONS IN: carbohydrate transmembrane transporter activity, sugar:hydrogen symporter activity; INVOLVED IN: transport, transmembrane transport; LOCATED IN: integral to membrane, membrane; EXPRESSED IN: 19 plant structures; EXPRESSED DURING: 13 growth stages; CONTAINS InterPro DOMAIN/s: Major facilitator superfamily (InterPro:IPR020846), General su…
XLOC_006329	XLOC_006329	AT1G51130	Chr1:18939276-18941704	WT	18	OK	2.93975	6.08522	1.04961	2.69101	5e-05	0.000622834	AT1G51130.1	Nse4, component of Smc5/6 DNA repair complex; CONTAINS InterPro DOMAIN/s: Nse4 (InterPro:IPR014854); BEST Arabidopsis thaliana protein match is: Nse4, component of Smc5/6 DNA repair complex (TAIR:AT3G20760.1); Has 297 Blast hits to 295 proteins in 132 species: Archae - 0; Bacteria - 0; Metazoa - 72; Fungi - 132; Plants - 74; Viruses - 0; Other Eukaryotes - 19 (source: NCBI BLink).
XLOC_016998	XLOC_016998	AT3G16210	Chr3:5494532-5495615	WT	18	OK	2.86278	5.92518	1.04944	2.62783	0.00055	0.00498267	AT3G16210.1	F-box family protein; CONTAINS InterPro DOMAIN/s: F-box domain, cyclin-like (InterPro:IPR001810), F-box domain, Skp2-like (InterPro:IPR022364), F-box associated domain, type 1 (InterPro:IPR006527), F-box associated interaction domain (InterPro:IPR017451); BEST Arabidopsis thaliana protein match is: F-box associated ubiquitination effector family protein (TAIR:AT1G32600.1); Has 2517 Blast hits to …
XLOC_008293	XLOC_008293	AT2G07669,AT2G07673,AT2G07674,AT2G07675,AT2G07676,AT2G07678,AT2G07681,AT2G07751,AT2G07768	Chr2:3266083-3297616	WT	18	OK	22.9036	47.1893	1.04289	2.81517	0.00165	0.0121901	AT2G07669.1	unknown protein; Has 35333 Blast hits to 34131 proteins in 2444 species: Archae - 798; Bacteria - 22429; Metazoa - 974; Fungi - 991; Plants - 531; Viruses - 0; Other Eukaryotes - 9610 (source: NCBI BLink).
XLOC_008600	XLOC_008600	AT2G13960	Chr2:5859577-5861343	WT	18	OK	5.89868	12.1489	1.04237	2.22981	0.0003	0.0030153	AT2G13960.1	Homeodomain-like superfamily protein; FUNCTIONS IN: DNA binding, sequence-specific DNA binding transcription factor activity; INVOLVED IN: regulation of transcription, DNA-dependent, regulation of transcription; LOCATED IN: chloroplast; EXPRESSED IN: male gametophyte, pollen tube; EXPRESSED DURING: M germinated pollen stage; CONTAINS InterPro DOMAIN/s: SANT, DNA-binding (InterPro:IPR001005), Home…
XLOC_028748	XLOC_028748	AT5G22800	Chr5:7616055-7620281	WT	18	OK	9.81978	20.1961	1.04031	3.58742	5e-05	0.000622834	AT5G22800.1	A locus involved in embryogenesis. Mutations in this locus result in embryo lethality.
XLOC_019345	XLOC_019345	AT3G63380	Chr3:23401823-23410660	WT	18	OK	30.9377	63.5958	1.03957	3.32625	5e-05	0.000622834	AT3G63380.1	ATPase E1-E2 type family protein / haloacid dehalogenase-like hydrolase family protein; FUNCTIONS IN: calcium-transporting ATPase activity, calmodulin binding; INVOLVED IN: calcium ion transport, cation transport, metabolic process, ATP biosynthetic process; LOCATED IN: membrane; EXPRESSED IN: 11 plant structures; EXPRESSED DURING: LP.06 six leaves visible, LP.04 four leaves visible, 4 anthesis, …
XLOC_025282	XLOC_025282	AT5G24530	Chr5:8378832-8383401	WT	18	OK	84.0208	172.696	1.03941	4.2232	5e-05	0.000622834	AT5G24530.1	Encodes a putative 2OG-Fe(II) oxygenase that is defense-associated but required for susceptibility to downy mildew.
XLOC_002451	XLOC_002451	AT1G51100	Chr1:18934307-18935193	WT	18	OK	2.30462	4.73625	1.03922	2.21352	0.0025	0.0170945	AT1G51100.1	unknown protein; FUNCTIONS IN: molecular_function unknown; INVOLVED IN: biological_process unknown; LOCATED IN: chloroplast, chloroplast stroma; EXPRESSED IN: 22 plant structures; EXPRESSED DURING: 13 growth stages; Has 26 Blast hits to 26 proteins in 9 species: Archae - 0; Bacteria - 0; Metazoa - 0; Fungi - 0; Plants - 26; Viruses - 0; Other Eukaryotes - 0 (source: NCBI BLink).
XLOC_015552	XLOC_015552	AT3G51500,AT3G51510	Chr3:19108133-19110281	WT	18	OK	67.0301	137.652	1.03814	4.60498	5e-05	0.000622834	AT3G51500.1	unknown protein; FUNCTIONS IN: molecular_function unknown; INVOLVED IN: biological_process unknown; LOCATED IN: chloroplast; EXPRESSED IN: 22 plant structures; EXPRESSED DURING: 13 growth stages; Has 23 Blast hits to 23 proteins in 10 species: Archae - 0; Bacteria - 0; Metazoa - 0; Fungi - 0; Plants - 23; Viruses - 0; Other Eukaryotes - 0 (source: NCBI BLink).
XLOC_011472	XLOC_011472	AT2G18600	Chr2:8073199-8074982	WT	18	OK	37.8388	77.6928	1.03792	4.53027	5e-05	0.000622834	AT2G18600.1	Ubiquitin-conjugating enzyme family protein; FUNCTIONS IN: ubiquitin-protein ligase activity, small conjugating protein ligase activity, acid-amino acid ligase activity, ATP binding; INVOLVED IN: regulation of protein metabolic process, protein modification process, post-translational protein modification; LOCATED IN: cellular_component unknown; EXPRESSED IN: 21 plant structures; EXPRESSED DURING…
XLOC_006689	XLOC_006689	AT1G58130	Chr1:21520264-21524056	WT	18	OK	9.71506	19.9423	1.03754	2.58402	0.00045	0.00422513	AT1G58130.1	pseudogene, putative heat shock transcription factor HSF30
XLOC_028810	XLOC_028810	AT5G24040	Chr5:8125783-8127336	WT	18	OK	3.06432	6.28271	1.03582	1.96281	0.00115	0.00914318	AT5G24040.1	Protein of unknown function (DUF295); CONTAINS InterPro DOMAIN/s: Protein of unknown function DUF295 (InterPro:IPR005174); BEST Arabidopsis thaliana protein match is: F-box family protein with a domain of unknown function (DUF295) (TAIR:AT2G16290.1); Has 1807 Blast hits to 1807 proteins in 277 species: Archae - 0; Bacteria - 0; Metazoa - 736; Fungi - 347; Plants - 385; Viruses - 0; Other Eukaryot…
XLOC_022319	XLOC_022319	AT4G07820	Chr4:4636763-4637450	WT	18	OK	32.6325	66.8899	1.03548	4.59593	5e-05	0.000622834	AT4G07820.1	CAP (Cysteine-rich secretory proteins, Antigen 5, and Pathogenesis-related 1 protein) superfamily protein; FUNCTIONS IN: molecular_function unknown; LOCATED IN: endomembrane system, extracellular region; EXPRESSED IN: stem, hypocotyl, root; CONTAINS InterPro DOMAIN/s: Allergen V5/Tpx-1 related (InterPro:IPR001283), SCP-like extracellular (InterPro:IPR014044); BEST Arabidopsis thaliana protein mat…
XLOC_000715	XLOC_000715	AT1G15170	Chr1:5220640-5224121	WT	18	OK	13.9127	28.5062	1.03487	4.10639	5e-05	0.000622834	AT1G15170.1	MATE efflux family protein; FUNCTIONS IN: antiporter activity, drug transmembrane transporter activity, transporter activity; INVOLVED IN: drug transmembrane transport, transmembrane transport; LOCATED IN: chloroplast, membrane; EXPRESSED IN: 17 plant structures; EXPRESSED DURING: 9 growth stages; CONTAINS InterPro DOMAIN/s: MATE family transporter related protein (InterPro:IPR015521), Multi anti…
XLOC_005821	XLOC_005821	AT1G36370	Chr1:13696041-13698639	WT	18	OK	20.0171	40.9891	1.03401	3.9541	5e-05	0.000622834	AT1G36370.1	Encodes a putative serine hydroxymethyltransferase.
XLOC_018426	XLOC_018426	AT3G46810	Chr3:17238235-17240623	WT	18	OK	1.17978	2.41534	1.03371	2.37215	0.00085	0.00715019	AT3G46810.1	Cysteine/Histidine-rich C1 domain family protein; FUNCTIONS IN: zinc ion binding; INVOLVED IN: intracellular signaling pathway; LOCATED IN: cellular_component unknown; EXPRESSED IN: root; CONTAINS InterPro DOMAIN/s: Protein kinase C-like, phorbol ester/diacylglycerol binding (InterPro:IPR002219), DC1 (InterPro:IPR004146), Zinc finger, PHD-type (InterPro:IPR001965), C1-like (InterPro:IPR011424); B…
XLOC_007858	XLOC_007858	AT1G80920	Chr1:30400733-30404690	WT	18	OK	117.382	240.203	1.03305	2.83738	5e-05	0.000622834	AT1G80920.1	A nuclear encoded soluble protein found in the chloroplast stroma.
XLOC_009395	XLOC_009395	AT2G27830	Chr2:11860217-11861475	WT	18	OK	9.62484	19.69	1.03263	3.72496	5e-05	0.000622834	AT2G27830.1	unknown protein; BEST Arabidopsis thaliana protein match is: unknown protein (TAIR:AT4G22758.1); Has 131 Blast hits to 131 proteins in 17 species: Archae - 0; Bacteria - 0; Metazoa - 0; Fungi - 0; Plants - 131; Viruses - 0; Other Eukaryotes - 0 (source: NCBI BLink).
XLOC_004258	XLOC_004258	AT1G05780	Chr1:1726542-1730128	WT	18	OK	4.97554	10.1745	1.03203	1.82295	0.0029	0.0191503	AT1G05780.1	Vacuolar ATPase assembly integral membrane protein VMA21-like domain; FUNCTIONS IN: molecular_function unknown; INVOLVED IN: biological_process unknown; LOCATED IN: endomembrane system; CONTAINS InterPro DOMAIN/s: Vacuolar ATPase assembly integral membrane protein VMA21-like domain (InterPro:IPR019013); BEST Arabidopsis thaliana protein match is: Vacuolar ATPase assembly integral membrane protein…
XLOC_028654	XLOC_028654	AT5G20470	Chr5:6916132-6920238	WT	18	OK	1.02315	2.09191	1.03181	1.83796	0.0004	0.00385261	AT5G20470.1	Encodes a headless derivative of myosin XI-K, which likely arose from a partial duplication of the XI-K gene and is developmentally regulated.
XLOC_024787	XLOC_024787	AT5G14000	Chr5:4518007-4519300	WT	18	OK	10.8631	22.1686	1.02908	3.65905	5e-05	0.000622834	AT5G14000.1	NAC domain containing protein 84 (NAC084); FUNCTIONS IN: sequence-specific DNA binding transcription factor activity; INVOLVED IN: multicellular organismal development, regulation of transcription; LOCATED IN: cellular_component unknown; EXPRESSED IN: 7 plant structures; EXPRESSED DURING: 4 anthesis, C globular stage, petal differentiation and expansion stage; CONTAINS InterPro DOMAIN/s: No apica…
XLOC_003856	XLOC_003856	AT1G78000	Chr1:29329734-29333146	WT	18	OK	46.7486	95.3511	1.02833	3.67175	5e-05	0.000622834	AT1G78000.1	Encodes a sulfate transporter that can restore sulfate uptake capacity of a yeast mutant lacking sulfate transporter genes.
XLOC_013471	XLOC_013471	AT3G09230	Chr3:2833397-2835391	WT	18	OK	3.93074	7.99975	1.02515	2.56746	5e-05	0.000622834	AT3G09230.1	member of MYB3R- and R2R3- type MYB- encoding genes
XLOC_027275	XLOC_027275	AT5G59690	Chr5:24051551-24052143	WT	18	OK	68.5064	139.314	1.02403	5.095	5e-05	0.000622834	AT5G59690.1	Histone superfamily protein; FUNCTIONS IN: DNA binding; INVOLVED IN: nucleosome assembly; LOCATED IN: thylakoid; EXPRESSED IN: male gametophyte, pollen tube; EXPRESSED DURING: L mature pollen stage, M germinated pollen stage; CONTAINS InterPro DOMAIN/s: Histone H4, conserved site (InterPro:IPR019809), Histone-fold (InterPro:IPR009072), Histone core (InterPro:IPR007125), Histone H4 (InterPro:IPR00…
XLOC_015998	XLOC_015998	AT3G60490	Chr3:22349307-22351038	WT	18	OK	10.8367	21.9905	1.02096	2.46432	0.0002	0.00212981	AT3G60490.1	encodes a member of the DREB subfamily A-4 of ERF/AP2 transcription factor family. The protein contains one AP2 domain. There are 17 members in this subfamily including TINY.
XLOC_001171	XLOC_001171	AT1G23550	Chr1:8350792-8354585	WT	18	OK	12.8836	26.0935	1.01815	2.64982	0.0003	0.0030153	AT1G23550.1	Encodes a protein with similarity to RCD1 but without the WWE domain. The protein does have a PARP signature upstream of the C-terminal protein interaction domain. The PARP signature may bind NAD+ and attach the ADP-ribose-moiety from NAD+ to the target molecule. Its presence suggests a role for the protein in ADP ribosylation.
XLOC_007591	XLOC_007591	AT1G75750	Chr1:28441525-28442429	WT	18	OK	39.5776	80.1345	1.01774	3.40607	5e-05	0.000622834	AT1G75750.1	GA-responsive GAST1 protein homolog regulated by BR and GA antagonistically. Possibly involved in cell elongation based on expression data
XLOC_005304	XLOC_005304	AT1G26420	Chr1:9141566-9143304	WT	18	OK	3.27611	6.63139	1.01733	2.83903	0.00015	0.00165462	AT1G26420.1	FAD-binding Berberine family protein; FUNCTIONS IN: electron carrier activity, oxidoreductase activity, FAD binding, catalytic activity; LOCATED IN: endomembrane system; EXPRESSED IN: stem, stamen; EXPRESSED DURING: 4 anthesis; CONTAINS InterPro DOMAIN/s: FAD-binding, type 2 (InterPro:IPR016166), Berberine/berberine-like (InterPro:IPR012951), FAD linked oxidase, N-terminal (InterPro:IPR006094); B…
XLOC_025427	XLOC_025427	AT5G27230	Chr5:9584091-9588049	WT	18	OK	0.493481	0.997897	1.0159	1.66335	0.0032	0.0208178	AT5G27230.1	Frigida-like protein; CONTAINS InterPro DOMAIN/s: Frigida-like (InterPro:IPR012474); BEST Arabidopsis thaliana protein match is: FRIGIDA-like protein (TAIR:AT5G48385.1); Has 1807 Blast hits to 1807 proteins in 277 species: Archae - 0; Bacteria - 0; Metazoa - 736; Fungi - 347; Plants - 385; Viruses - 0; Other Eukaryotes - 339 (source: NCBI BLink).
XLOC_009350	XLOC_009350	AT2G26820	Chr2:11437637-11442316	WT	18	OK	7.03617	14.2275	1.01582	2.71334	5e-05	0.000622834	AT2G26820.1	phloem protein 2-A3 (PP2-A3); CONTAINS InterPro DOMAIN/s: AIG1 (InterPro:IPR006703); BEST Arabidopsis thaliana protein match is: P-loop containing nucleoside triphosphate hydrolases superfamily protein (TAIR:AT1G33900.1); Has 7075 Blast hits to 5270 proteins in 530 species: Archae - 11; Bacteria - 693; Metazoa - 2878; Fungi - 405; Plants - 651; Viruses - 87; Other Eukaryotes - 2350 (source: NCBI …
XLOC_026381	XLOC_026381	AT5G43570	Chr5:17506400-17507600	WT	18	OK	7.44421	15.0441	1.015	2.14002	0.00065	0.00575485	AT5G43570.1	Predicted to encode a PR (pathogenesis-related) peptide that belongs to the PR-6 proteinase inhibitor family. Six putative PR-6-type protein encoding genes are found in Arabidopsis: At2g38900, At2g38870, At5g43570, At5g43580, At3g50020 and At3g46860.
XLOC_024294	XLOC_024294	AT5G03390	Chr5:834852-837515	WT	18	OK	11.243	22.7	1.01366	3.26864	5e-05	0.000622834	AT5G03390.1	Protein of unknown function (DUF295); FUNCTIONS IN: molecular_function unknown; INVOLVED IN: biological_process unknown; LOCATED IN: chloroplast; EXPRESSED IN: 10 plant structures; EXPRESSED DURING: 7 growth stages; CONTAINS InterPro DOMAIN/s: Protein of unknown function DUF295 (InterPro:IPR005174); BEST Arabidopsis thaliana protein match is: Protein of unknown function (DUF295) (TAIR:AT1G68960.1…
XLOC_006189	XLOC_006189	AT1G48400	Chr1:17882135-17883855	WT	18	OK	1.7263	3.48512	1.01352	2.36737	0.0012	0.00948481	AT1G48400.1	F-box/RNI-like/FBD-like domains-containing protein; CONTAINS InterPro DOMAIN/s: F-box domain, cyclin-like (InterPro:IPR001810), FBD-like (InterPro:IPR006566), F-box domain, Skp2-like (InterPro:IPR022364); BEST Arabidopsis thaliana protein match is: RNI-like superfamily protein (TAIR:AT1G48390.1); Has 116287 Blast hits to 17670 proteins in 977 species: Archae - 853; Bacteria - 43940; Metazoa - 205…
XLOC_017108	XLOC_017108	AT3G18610	Chr3:6404082-6407822	WT	18	OK	16.2492	32.7814	1.01251	3.66926	5e-05	0.000622834	AT3G18610.1	Encodes ATNUC-L2 (NUCLEOLIN LIKE 2).
XLOC_024924	XLOC_024924	AT5G16600	Chr5:5438290-5440245	WT	18	OK	6.99779	14.1161	1.01237	3.22081	5e-05	0.000622834	AT5G16600.1	Encodes a putative transcription factor (MYB43).
XLOC_006848	XLOC_006848	AT1G61480	Chr1:22681315-22684475	WT	18	OK	1.74885	3.5201	1.00921	2.55214	5e-05	0.000622834	AT1G61480.1	S-locus lectin protein kinase family protein; FUNCTIONS IN: in 6 functions; INVOLVED IN: protein amino acid phosphorylation, recognition of pollen; LOCATED IN: endomembrane system; EXPRESSED IN: root; CONTAINS InterPro DOMAIN/s: Curculin-like (mannose-binding) lectin (InterPro:IPR001480), Apple-like (InterPro:IPR003609), Protein kinase, ATP binding site (InterPro:IPR017441), PAN-2 domain (InterPr…
XLOC_014442	XLOC_014442	AT3G26610	Chr3:9776849-9780506	WT	18	OK	3.39759	6.8276	1.00687	2.44892	5e-05	0.000622834	AT3G26610.1	Pectin lyase-like superfamily protein; FUNCTIONS IN: polygalacturonase activity; INVOLVED IN: carbohydrate metabolic process; LOCATED IN: endomembrane system; EXPRESSED IN: root; CONTAINS InterPro DOMAIN/s: Pectin lyase fold/virulence factor (InterPro:IPR011050), Glycoside hydrolase, family 28 (InterPro:IPR000743), Pectin lyase fold (InterPro:IPR012334), Parallel beta-helix repeat (InterPro:IPR00…
XLOC_024591	XLOC_024591	AT5G09290	Chr5:2882359-2888538	WT	18	OK	19.4501	39.0388	1.00513	2.87863	5e-05	0.000622834	AT5G09290.1	Inositol monophosphatase family protein; FUNCTIONS IN: 3'(2'),5'-bisphosphate nucleotidase activity, inositol or phosphatidylinositol phosphatase activity; INVOLVED IN: sulfur metabolic process; EXPRESSED IN: 6 plant structures; EXPRESSED DURING: LP.06 six leaves visible, LP.04 four leaves visible, 4 anthesis; CONTAINS InterPro DOMAIN/s: Inositol monophosphatase (InterPro:IPR000760), 3(2),5 -bisp…
XLOC_013751	XLOC_013751	AT3G14700,AT3G14710	Chr3:4940317-4943521	WT	18	OK	11.454	22.9634	1.00348	3.13924	5e-05	0.000622834	AT3G14700.1	SART-1 family; CONTAINS InterPro DOMAIN/s: SART-1 protein (InterPro:IPR005011); BEST Arabidopsis thaliana protein match is: SART-1 family (TAIR:AT5G16780.1); Has 296 Blast hits to 296 proteins in 144 species: Archae - 0; Bacteria - 0; Metazoa - 92; Fungi - 96; Plants - 41; Viruses - 0; Other Eukaryotes - 67 (source: NCBI BLink).
XLOC_019252	XLOC_019252	AT3G61890	Chr3:22914153-22915325	WT	18	OK	41.3693	20.681	-1.00025	-3.62587	5e-05	0.000622834	AT3G61890.1	Encodes a homeodomain leucine zipper class I (HD-Zip I) protein. Loss of function mutant has abnormally shaped leaves and stems.
XLOC_015434	XLOC_015434	AT3G49120,AT3G49130	Chr3:18207650-18217922	WT	18	OK	107.154	53.5646	-1.00034	-3.23458	5e-05	0.000622834	AT3G49120.1	Class III peroxidase Perx34. Expressed in roots, leaves and stems. Located in the cell wall. Involved in cell elongation. Expression activated by light. May play a role in generating H2O2 during defense response.
XLOC_009698	XLOC_009698	AT2G33570	Chr2:14217222-14219252	WT	18	OK	8.3643	4.17865	-1.00121	-3.10214	5e-05	0.000622834	AT2G33570.1	Domain of unknown function (DUF23); CONTAINS InterPro DOMAIN/s: Protein of unknown function DUF23 (InterPro:IPR008166); BEST Arabidopsis thaliana protein match is: Domain of unknown function (DUF23) (TAIR:AT5G44670.1); Has 195 Blast hits to 195 proteins in 24 species: Archae - 2; Bacteria - 7; Metazoa - 43; Fungi - 0; Plants - 139; Viruses - 0; Other Eukaryotes - 4 (source: NCBI BLink).
XLOC_030204	XLOC_030204	AT5G48740	Chr5:19763151-19769369	WT	18	OK	2.63202	1.3146	-1.00155	-1.97722	0.0015	0.0113252	AT5G48740.1	Leucine-rich repeat protein kinase family protein; FUNCTIONS IN: kinase activity; INVOLVED IN: protein amino acid phosphorylation; LOCATED IN: endomembrane system; EXPRESSED IN: 10 plant structures; EXPRESSED DURING: LP.04 four leaves visible, 4 anthesis, petal differentiation and expansion stage; CONTAINS InterPro DOMAIN/s: Protein kinase, ATP binding site (InterPro:IPR017441), Protein kinase, c…
XLOC_026476	XLOC_026476	AT5G45020	Chr5:18168552-18170775	WT	18	OK	6.98218	3.48417	-1.00286	-2.35557	0.00015	0.00165462	AT5G45020.1	Glutathione S-transferase family protein; CONTAINS InterPro DOMAIN/s: Glutathione S-transferase, predicted (InterPro:IPR016639), Glutathione S-transferase, C-terminal (InterPro:IPR004046), Glutathione S-transferase, C-terminal-like (InterPro:IPR010987), Glutathione S-transferase/chloride channel, C-terminal (InterPro:IPR017933), Thioredoxin-like fold (InterPro:IPR012336); BEST Arabidopsis thalian…
XLOC_024168	XLOC_024168	AT5G01120	Chr5:44812-47127	WT	18	OK	1.76196	0.878441	-1.00417	-1.84792	0.0059	0.0337288	AT5G01120.1	Protein of unknown function (DUF674); CONTAINS InterPro DOMAIN/s: Protein of unknown function DUF674 (InterPro:IPR007750); BEST Arabidopsis thaliana protein match is: Protein of unknown function (DUF674) (TAIR:AT5G43240.3); Has 1807 Blast hits to 1807 proteins in 277 species: Archae - 0; Bacteria - 0; Metazoa - 736; Fungi - 347; Plants - 385; Viruses - 0; Other Eukaryotes - 339 (source: NCBI BLin…
XLOC_018921	XLOC_018921	AT3G56000	Chr3:20783300-20785983	WT	18	OK	4.40766	2.19616	-1.00503	-2.34647	5e-05	0.000622834	AT3G56000.1	encodes a gene similar to cellulose synthase
XLOC_007851	XLOC_007851	AT1G80730	Chr1:30339322-30340247	WT	18	OK	6.40213	3.18947	-1.00524	-2.48064	0.00105	0.008471	AT1G80730.1	Encodes a zinc finger protein and is expressed at high levels in the shoot apex, including the apical meristem, developing leaves and the developing vascular system. expression induced three days post germination. T-DNA insertion mutant has a dominant phenotype in leaf initiation.
XLOC_023650	XLOC_023650	AT4G30440	Chr4:14881854-14883480	WT	18	OK	247.903	123.496	-1.00531	-3.73764	5e-05	0.000622834	AT4G30440.1	UDP-D-glucuronate 4-epimerase
XLOC_008959	XLOC_008959	AT2G20142,AT2G20150,AT2G20170	Chr2:8695291-8706900	WT	18	OK	49.2789	24.5403	-1.00582	-3.47864	5e-05	0.000622834	AT2G20142.1	Toll-Interleukin-Resistance (TIR) domain family protein; FUNCTIONS IN: transmembrane receptor activity; INVOLVED IN: signal transduction, innate immune response; LOCATED IN: intrinsic to membrane; EXPRESSED IN: 13 plant structures; EXPRESSED DURING: 9 growth stages; CONTAINS InterPro DOMAIN/s: Toll-Interleukin receptor (InterPro:IPR000157); BEST Arabidopsis thaliana protein match is: Disease resi…
XLOC_029599	XLOC_029599	AT5G38280	Chr5:15290724-15297566	WT	18	OK	42.1469	20.9853	-1.00605	-3.53465	5e-05	0.000622834	AT5G38280.1	putative receptor serine/threonine kinase PR5K (PR5K) mRNA, PR5-like receptor kinase
XLOC_012630	XLOC_012630	AT2G39450	Chr2:16471631-16473818	WT	18	OK	15.7112	7.81644	-1.00721	-3.41258	5e-05	0.000622834	AT2G39450.1	Encodes a Golgi-localized manganese transporter that is involved in Mn tolerance. When expressed into yeast cells, this gene confer Mn<sup>2+</sup> and Cu<sup>2+</sup> tolerance.
XLOC_013188	XLOC_013188	AT3G02910	Chr3:649813-661677	WT	18	OK	101.952	50.6909	-1.0081	-3.88152	5e-05	0.000622834	AT3G02910.1	AIG2-like (avirulence induced gene) family protein; CONTAINS InterPro DOMAIN/s: Butirosin biosynthesis, BtrG-like (InterPro:IPR013024), AIG2-like (InterPro:IPR009288); BEST Arabidopsis thaliana protein match is: AIG2-like (avirulence induced gene) family protein (TAIR:AT5G46720.1); Has 320 Blast hits to 319 proteins in 102 species: Archae - 4; Bacteria - 64; Metazoa - 146; Fungi - 0; Plants - 79;…
XLOC_017007	XLOC_017007	AT3G16530	Chr3:5624376-5625470	WT	18	OK	9.30244	4.6247	-1.00825	-2.71881	0.0002	0.00212981	AT3G16530.1	Lectin like protein whose expression is induced upon treatment with chitin oligomers.
XLOC_018975	XLOC_018975	AT3G57010	Chr3:21095653-21097451	WT	18	OK	10.08	5.01043	-1.00849	-3.0398	5e-05	0.000622834	AT3G57010.1	Calcium-dependent phosphotriesterase superfamily protein; FUNCTIONS IN: strictosidine synthase activity; INVOLVED IN: alkaloid biosynthetic process, biosynthetic process; LOCATED IN: endoplasmic reticulum; EXPRESSED IN: 9 plant structures; EXPRESSED DURING: 4 anthesis, petal differentiation and expansion stage; CONTAINS InterPro DOMAIN/s: Strictosidine synthase (InterPro:IPR004141), Strictosidine…
XLOC_009360	XLOC_009360	AT2G27080	Chr2:11563932-11571856	WT	18	OK	377.92	187.831	-1.00864	-3.27687	5e-05	0.000622834	AT2G27080.1	Late embryogenesis abundant (LEA) hydroxyproline-rich glycoprotein family; CONTAINS InterPro DOMAIN/s: Late embryogenesis abundant protein, group 2 (InterPro:IPR004864); BEST Arabidopsis thaliana protein match is: Late embryogenesis abundant (LEA) hydroxyproline-rich glycoprotein family (TAIR:AT5G21130.1); Has 1062 Blast hits to 1061 proteins in 28 species: Archae - 0; Bacteria - 0; Metazoa - 0; …
XLOC_019508	XLOC_019508	AT4G02540	Chr4:1117153-1119817	WT	18	OK	57.7574	28.686	-1.00966	-3.64004	5e-05	0.000622834	AT4G02540.1	Cysteine/Histidine-rich C1 domain family protein; FUNCTIONS IN: zinc ion binding; INVOLVED IN: biological_process unknown; LOCATED IN: cellular_component unknown; EXPRESSED IN: 22 plant structures; EXPRESSED DURING: 13 growth stages; CONTAINS InterPro DOMAIN/s: DC1 (InterPro:IPR004146), Zinc finger, PHD-type (InterPro:IPR001965), C1-like (InterPro:IPR011424), Zinc finger, PHD-finger (InterPro:IPR…
XLOC_000656	XLOC_000656	AT1G13930	Chr1:4761011-4766845	WT	18	OK	117.512	58.35	-1.01001	-2.80114	0.00045	0.00422513	AT1G13930.1	Involved in response to salt stress. Knockout mutants are hypersensitive to salt stress.
XLOC_022897	XLOC_022897	AT4G16563	Chr4:9329656-9331523	WT	18	OK	9.278	4.60691	-1.01001	-3.33963	5e-05	0.000622834	AT4G16563.1	Eukaryotic aspartyl protease family protein; FUNCTIONS IN: aspartic-type endopeptidase activity; INVOLVED IN: proteolysis; LOCATED IN: plant-type cell wall; EXPRESSED IN: 19 plant structures; EXPRESSED DURING: 11 growth stages; CONTAINS InterPro DOMAIN/s: Peptidase aspartic (InterPro:IPR021109), Peptidase aspartic, catalytic (InterPro:IPR009007), Peptidase A1 (InterPro:IPR001461), Peptidase aspar…
XLOC_020800	XLOC_020800	AT4G21740	Chr4:11545925-11546434	WT	18	OK	19.9997	9.93035	-1.01007	-3.4855	0.0003	0.0030153	AT4G21740.1	unknown protein; BEST Arabidopsis thaliana protein match is: unknown protein (TAIR:AT1G30515.1); Has 20 Blast hits to 20 proteins in 4 species: Archae - 0; Bacteria - 0; Metazoa - 0; Fungi - 0; Plants - 20; Viruses - 0; Other Eukaryotes - 0 (source: NCBI BLink).
XLOC_020573	XLOC_020573	AT4G17760	Chr4:9871788-9873398	WT	18	OK	3.14856	1.56331	-1.01009	-1.65392	0.00435	0.0266671	AT4G17760.1	damaged DNA binding;exodeoxyribonuclease IIIs; FUNCTIONS IN: damaged DNA binding, exodeoxyribonuclease III activity; INVOLVED IN: DNA repair; LOCATED IN: nucleus; EXPRESSED IN: 9 plant structures; EXPRESSED DURING: 4 anthesis, F mature embryo stage, petal differentiation and expansion stage, E expanded cotyledon stage, D bilateral stage; CONTAINS InterPro DOMAIN/s: Repair protein Rad1/Rec1 (Inter…
XLOC_013436	XLOC_013436	AT3G07960	Chr3:2534886-2538372	WT	18	OK	1.44751	0.718656	-1.0102	-1.97258	0.00285	0.0188984	AT3G07960.1	Encodes phosphatidylinositol-4-phosphate 5-kinase 6 (PIP5K6). Regulates clathrin-dependent endocytosis in pollen tubes.
XLOC_012433	XLOC_012433	AT2G35930	Chr2:15082854-15084473	WT	18	OK	182.025	90.3325	-1.01082	-3.64485	5e-05	0.000622834	AT2G35930.1	Encodes a cytoplasmically localized U-box domain containing E3 ubiquitin ligase that is involved in the response to water stress and acts as a negative regulator of PAMP-triggered immunity.
XLOC_002094	XLOC_002094	AT1G43020	Chr1:16155402-16157927	WT	18	OK	3.14949	1.56256	-1.0112	-1.79202	0.00095	0.00781522	AT1G43020.1	Protein of unknown function, DUF547; CONTAINS InterPro DOMAIN/s: Protein of unknown function DUF547 (InterPro:IPR006869); BEST Arabidopsis thaliana protein match is: Protein of unknown function, DUF547 (TAIR:AT1G21060.1); Has 538 Blast hits to 520 proteins in 64 species: Archae - 4; Bacteria - 30; Metazoa - 26; Fungi - 0; Plants - 451; Viruses - 0; Other Eukaryotes - 27 (source: NCBI BLink).
XLOC_029935	XLOC_029935	AT5G44110	Chr5:17754063-17755742	WT	18	OK	9.49474	4.70977	-1.01147	-2.43337	0.0001	0.00115693	AT5G44110.1	Encodes a member of the NAP subfamily of ABC transporters.
XLOC_025220	XLOC_025220	AT5G23280	Chr5:7842970-7844275	WT	18	OK	16.172	8.02075	-1.01169	-3.34432	5e-05	0.000622834	AT5G23280.1	TCP family transcription factor ; CONTAINS InterPro DOMAIN/s: Transcription factor, TCP (InterPro:IPR005333), Transcription factor TCP subgroup (InterPro:IPR017887); BEST Arabidopsis thaliana protein match is: TCP family transcription factor (TAIR:AT5G08330.1); Has 1807 Blast hits to 1807 proteins in 277 species: Archae - 0; Bacteria - 0; Metazoa - 736; Fungi - 347; Plants - 385; Viruses - 0; Oth…
XLOC_004914	XLOC_004914	AT1G18370	Chr1:6319649-6324222	WT	18	OK	6.77762	3.36118	-1.01181	-3.05146	5e-05	0.000622834	AT1G18370.1	Encodes a kinesin HINKEL. Required for cytokinesis in pollen. Mutant has cytokinesis defects; seedling lethal.
XLOC_007577	XLOC_007577	AT1G75500	Chr1:28337725-28340275	WT	18	OK	132.98	65.9417	-1.01194	-3.8154	5e-05	0.000622834	AT1G75500.1	An Arabidopsis thaliana homolog of Medicago truncatula NODULIN21 (MtN21). The gene encodes a plant-specific, predicted integral membrane protein and is a member of the Plant-Drug/Metabolite Exporter (P-DME) family (Transporter Classification number: TC 2.A.7.3) and the nodulin MtN21-like transporter family.
XLOC_000412	XLOC_000412	AT1G09450,AT1G09460	Chr1:3049023-3057452	WT	18	OK	43.4852	21.562	-1.01203	-3.68123	5e-05	0.000622834	AT1G09450.1	Encodes a protein kinase that phosphorylates histone H3 at Thr3 and Thr11 and plays a role in mitotic cell division.
XLOC_027675	XLOC_027675	AT5G01040	Chr5:9868-16173	WT	18	OK	127.971	63.43	-1.01258	-2.94931	5e-05	0.000622834	AT5G01040.1	putative laccase, knockout mutant showed early flowering
XLOC_024847	XLOC_024847	AT5G15230	Chr5:4944899-4946216	WT	18	OK	991.082	490.857	-1.0137	-3.14412	5e-05	0.000622834	AT5G15230.1	Encodes gibberellin-regulated protein GASA4. Promotes GA responses and exhibits redox activity.
XLOC_000914	XLOC_000914	AT1G18750	Chr1:6466525-6469984	WT	18	OK	6.82715	3.37868	-1.01483	-2.42653	5e-05	0.000622834	AT1G18750.1	Encodes a member of the MIKC (MADS box, Keratin binding domain, and C terminal domain containing )family of transcriptional regulators. AGL65 is expressed in pollen.It forms heterodimers with other MICK family members (AGL104). Involved in late stages of pollen development and pollen tube growth.
XLOC_000969	XLOC_000969	AT1G19770	Chr1:6832346-6833837	WT	18	OK	367.109	181.575	-1.01565	-3.78766	5e-05	0.000622834	AT1G19770.1	Member of a family of proteins related to PUP1, a purine transporter. May be involved in the transport of purine and purine derivatives such as cytokinins, across the plasma membrane.
XLOC_000610	XLOC_000610	AT1G12990	Chr1:4433639-4436075	WT	18	OK	33.4754	16.5566	-1.01569	-4.04854	5e-05	0.000622834	AT1G12990.1	beta-1,4-N-acetylglucosaminyltransferase family protein; FUNCTIONS IN: transferase activity, transferring glycosyl groups, acetylglucosaminyltransferase activity; INVOLVED IN: protein amino acid N-linked glycosylation; LOCATED IN: membrane; EXPRESSED IN: 23 plant structures; EXPRESSED DURING: 13 growth stages; CONTAINS InterPro DOMAIN/s: Glycosyl transferase, family 17 (InterPro:IPR006813); BEST …
XLOC_010281	XLOC_010281	AT2G44230	Chr2:18286524-18288400	WT	18	OK	4.00467	1.98033	-1.01595	-2.39159	0.0001	0.00115693	AT2G44230.1	Plant protein of unknown function (DUF946); FUNCTIONS IN: molecular_function unknown; INVOLVED IN: N-terminal protein myristoylation; LOCATED IN: chloroplast; EXPRESSED IN: 21 plant structures; EXPRESSED DURING: 12 growth stages; CONTAINS InterPro DOMAIN/s: Protein of unknown function DUF946 (InterPro:IPR009291); BEST Arabidopsis thaliana protein match is: Plant protein of unknown function (DUF94…
XLOC_011529	XLOC_011529	AT2G19780	Chr2:8522677-8525093	WT	18	OK	3.25572	1.60693	-1.01867	-2.33321	0.0007	0.00608993	AT2G19780.1	Leucine-rich repeat (LRR) family protein; INVOLVED IN: signal transduction; LOCATED IN: endomembrane system; EXPRESSED IN: 14 plant structures; EXPRESSED DURING: 7 growth stages; CONTAINS InterPro DOMAIN/s: Leucine-rich repeat-containing N-terminal domain, type 2 (InterPro:IPR013210), Leucine-rich repeat (InterPro:IPR001611); BEST Arabidopsis thaliana protein match is: Leucine-rich repeat (LRR) f…
XLOC_007245	XLOC_007245	AT1G68560	Chr1:25734181-25738002	WT	18	OK	11.9842	5.91372	-1.019	-3.60111	5e-05	0.000622834	AT1G68560.1	Encodes a bifunctional alpha-l-arabinofuranosidase/beta-d-xylosidase that belongs to family 3 of glycoside hydrolases.
XLOC_011724	XLOC_011724	AT2G23290	Chr2:9904786-9905920	WT	18	OK	8.89167	4.38586	-1.01959	-2.77257	5e-05	0.000622834	AT2G23290.1	Member of the R2R3 factor gene family.
XLOC_029997	XLOC_029997	AT5G45105	Chr5:18223271-18224991	WT	18	OK	6.63398	3.26988	-1.02063	-2.31287	0.00055	0.00498267	AT5G45105.2	zinc transporter 8 precursor (ZIP8); FUNCTIONS IN: cation transmembrane transporter activity; INVOLVED IN: cation transport; LOCATED IN: endomembrane system, integral to membrane, membrane; CONTAINS InterPro DOMAIN/s: Zinc/iron permease, fungal/plant (InterPro:IPR004698), Zinc/iron permease (InterPro:IPR003689); BEST Arabidopsis thaliana protein match is: iron-regulated transporter 1 (TAIR:AT4G19…
XLOC_028150	XLOC_028150	AT5G10550	Chr5:3324819-3335232	WT	18	OK	27.6549	13.6212	-1.02169	-1.74468	0.0033	0.0213417	AT5G10550.1	This gene is predicted to encode a bromodomain-containing protein. A plant line expressing RNAi constructs targeted against GTE7 shows some resistance to agrobacterium-mediated root transformation.
XLOC_016907	XLOC_016907	AT3G14310	Chr3:4771901-4775119	WT	18	OK	64.4403	31.7337	-1.02195	-3.91715	5e-05	0.000622834	AT3G14310.1	encodes a pectin methylesterase, targeted by a cellulose binding protein (CBP) from the parasitic nematode Heterodera schachtii during parasitism.
XLOC_011684	XLOC_011684	AT2G22500	Chr2:9563223-9564751	WT	18	OK	87.4841	43.0811	-1.02196	-3.94674	5e-05	0.000622834	AT2G22500.1	Encodes one of the mitochondrial dicarboxylate carriers (DIC): DIC1 (AT2G22500), DIC2 (AT4G24570), DIC3 (AT5G09470).
XLOC_031115	XLOC_031115	AT5G66550	Chr5:26559583-26561216	WT	18	OK	7.72826	3.80416	-1.02256	-2.61731	0.00075	0.00645449	AT5G66550.1	Maf-like protein; FUNCTIONS IN: molecular_function unknown; INVOLVED IN: biological_process unknown; LOCATED IN: chloroplast; EXPRESSED IN: 15 plant structures; EXPRESSED DURING: 9 growth stages; CONTAINS InterPro DOMAIN/s: Maf-like protein (InterPro:IPR003697); BEST Arabidopsis thaliana protein match is: Maf-like protein (TAIR:AT5G42770.2); Has 30201 Blast hits to 17322 proteins in 780 species: …
XLOC_019369	XLOC_019369	AT4G00080	Chr4:32892-33718	WT	18	OK	4.12047	2.02627	-1.02398	-2.05505	0.0046	0.0278301	AT4G00080.1	unfertilized embryo sac 11 (UNE11); FUNCTIONS IN: enzyme inhibitor activity, pectinesterase inhibitor activity, pectinesterase activity; INVOLVED IN: double fertilization forming a zygote and endosperm; LOCATED IN: endomembrane system; EXPRESSED IN: root; CONTAINS InterPro DOMAIN/s: Pectinesterase inhibitor (InterPro:IPR006501); BEST Arabidopsis thaliana protein match is: Plant invertase/pectin m…
XLOC_016061	XLOC_016061	AT3G61490	Chr3:22758062-22760505	WT	18	OK	12.8812	6.33305	-1.02429	-2.98269	5e-05	0.000622834	AT3G61490.1	Pectin lyase-like superfamily protein; FUNCTIONS IN: polygalacturonase activity; INVOLVED IN: carbohydrate metabolic process; LOCATED IN: endomembrane system; EXPRESSED IN: 22 plant structures; EXPRESSED DURING: 14 growth stages; CONTAINS InterPro DOMAIN/s: Pectin lyase fold/virulence factor (InterPro:IPR011050), Glycoside hydrolase, family 28 (InterPro:IPR000743), Pectin lyase fold (InterPro:IPR…
XLOC_012765	XLOC_012765	AT2G41870	Chr2:17470865-17472936	WT	18	OK	2.95429	1.45123	-1.02554	-2.13661	0.00225	0.0156972	AT2G41870.1	Remorin family protein; CONTAINS InterPro DOMAIN/s: Remorin, C-terminal (InterPro:IPR005516); BEST Arabidopsis thaliana protein match is: Remorin family protein (TAIR:AT3G57540.1); Has 469 Blast hits to 467 proteins in 36 species: Archae - 0; Bacteria - 7; Metazoa - 9; Fungi - 6; Plants - 437; Viruses - 0; Other Eukaryotes - 10 (source: NCBI BLink).
XLOC_030707	XLOC_030707	AT5G58480	Chr5:23641141-23642853	WT	18	OK	2.86083	1.40438	-1.02649	-2.14384	0.00205	0.0146099	AT5G58480.1	O-Glycosyl hydrolases family 17 protein; FUNCTIONS IN: cation binding, hydrolase activity, hydrolyzing O-glycosyl compounds, catalytic activity; INVOLVED IN: carbohydrate metabolic process; LOCATED IN: anchored to plasma membrane, plasma membrane, anchored to membrane; EXPRESSED IN: 22 plant structures; EXPRESSED DURING: 13 growth stages; CONTAINS InterPro DOMAIN/s: X8 (InterPro:IPR012946), Glyco…
XLOC_019110	XLOC_019110	AT3G59340	Chr3:21928763-21931570	WT	18	OK	4.61823	2.26682	-1.02667	-2.15826	0.00015	0.00165462	AT3G59340.1	Eukaryotic protein of unknown function (DUF914); CONTAINS InterPro DOMAIN/s: Protein of unknown function DUF914, eukaryotic (InterPro:IPR009262); BEST Arabidopsis thaliana protein match is: Eukaryotic protein of unknown function (DUF914) (TAIR:AT3G59310.1); Has 1089 Blast hits to 1084 proteins in 305 species: Archae - 7; Bacteria - 346; Metazoa - 190; Fungi - 138; Plants - 133; Viruses - 0; Other…
XLOC_003878	XLOC_003878	AT1G78280	Chr1:29452554-29459504	WT	18	OK	89.5912	43.96	-1.02716	-3.11373	5e-05	0.000622834	AT1G78280.1	transferases, transferring glycosyl groups; CONTAINS InterPro DOMAIN/s: Transcription factor jumonji/aspartyl beta-hydroxylase (InterPro:IPR003347), F-box domain, cyclin-like (InterPro:IPR001810), F-box domain, Skp2-like (InterPro:IPR022364), Transcription factor jumonji (InterPro:IPR013129), Aminoglycoside phosphotransferase (InterPro:IPR002575), Protein kinase-like domain (InterPro:IPR011009); …
XLOC_020590	XLOC_020590	AT4G18050	Chr4:10021857-10027428	WT	18	OK	11.7166	5.74684	-1.02772	-3.25272	5e-05	0.000622834	AT4G18050.1	P-glycoprotein 9 (PGP9); FUNCTIONS IN: ATPase activity, coupled to transmembrane movement of substances; INVOLVED IN: transport, transmembrane transport; LOCATED IN: integral to membrane; EXPRESSED IN: 13 plant structures; EXPRESSED DURING: L mature pollen stage, M germinated pollen stage, 4 anthesis, petal differentiation and expansion stage; CONTAINS InterPro DOMAIN/s: ATPase, AAA+ type, core (…
XLOC_013387	XLOC_013387	AT3G06990	Chr3:2206386-2208058	WT	18	OK	3.64675	1.78865	-1.02774	-2.34	0.00095	0.00781522	AT3G06990.1	Cysteine/Histidine-rich C1 domain family protein; FUNCTIONS IN: zinc ion binding; INVOLVED IN: biological_process unknown; LOCATED IN: cellular_component unknown; EXPRESSED IN: root; CONTAINS InterPro DOMAIN/s: Zinc finger, PHD-type, conserved site (InterPro:IPR019786), DC1 (InterPro:IPR004146), Zinc finger, PHD-type (InterPro:IPR001965), C1-like (InterPro:IPR011424); BEST Arabidopsis thaliana pr…
XLOC_018481	XLOC_018481	AT3G47960	Chr3:17692701-17700833	WT	18	OK	60.6627	29.7166	-1.02954	-3.18729	5e-05	0.000622834	AT3G47960.1	Major facilitator superfamily protein; FUNCTIONS IN: transporter activity; INVOLVED IN: oligopeptide transport; LOCATED IN: plasma membrane, membrane; EXPRESSED IN: 24 plant structures; EXPRESSED DURING: 13 growth stages; CONTAINS InterPro DOMAIN/s: Oligopeptide transporter (InterPro:IPR000109), Major facilitator superfamily, general substrate transporter (InterPro:IPR016196); BEST Arabidopsis th…
XLOC_011359	XLOC_011359	AT2G16500	Chr2:7150621-7153339	WT	18	OK	36.1994	17.7164	-1.03088	-4.06636	5e-05	0.000622834	AT2G16500.1	encodes a arginine decarboxylase (ADC), a rate-limiting enzyme that catalyzes the first step of polyamine (PA) biosynthesis via ADC pathway in Arabidopsis thaliana. Arabidopsis genome has two ADC paralogs, ADC1 and ADC2. Double mutant analysis showed that ADC genes are essential for the production of PA, and are required for normal seed development. Promoter region of ADC1 contains 742-bp AT-rich…
XLOC_001287	XLOC_001287	AT1G26560,AT1G26570	Chr1:9178377-9184416	WT	18	OK	25.4072	12.4285	-1.03158	-3.47525	5e-05	0.000622834	AT1G26560.1	beta glucosidase 40 (BGLU40); FUNCTIONS IN: cation binding, hydrolase activity, hydrolyzing O-glycosyl compounds, catalytic activity; INVOLVED IN: carbohydrate metabolic process; LOCATED IN: apoplast, chloroplast; EXPRESSED IN: 23 plant structures; EXPRESSED DURING: 13 growth stages; CONTAINS InterPro DOMAIN/s: Glycoside hydrolase, family 1 (InterPro:IPR001360), Glycoside hydrolase, family 1, act…
XLOC_024978	XLOC_024978	AT5G17847,AT5G17850	Chr5:5898617-5901102	WT	18	OK	55.1543	26.9635	-1.03246	-3.93681	5e-05	0.000622834	AT5G17847.1	unknown protein; LOCATED IN: endomembrane system; Has 30201 Blast hits to 17322 proteins in 780 species: Archae - 12; Bacteria - 1396; Metazoa - 17338; Fungi - 3422; Plants - 5037; Viruses - 0; Other Eukaryotes - 2996 (source: NCBI BLink).
XLOC_000443	XLOC_000443	AT1G10070	Chr1:3288003-3296198	WT	18	OK	16.6622	8.14285	-1.03298	-1.94904	0.00285	0.0188984	AT1G10070.1	Encodes a chloroplast branched-chain amino acid aminotransferase. Complements the yeast leu/iso-leu/val auxotrophy mutant.
XLOC_024395	XLOC_024395	AT5G05350	Chr5:1585296-1587517	WT	18	OK	2.31054	1.12876	-1.03349	-2.29622	0.001	0.00815767	AT5G05350.1	PLAC8 family protein; FUNCTIONS IN: molecular_function unknown; INVOLVED IN: biological_process unknown; LOCATED IN: chloroplast; EXPRESSED IN: 15 plant structures; EXPRESSED DURING: 6 growth stages; CONTAINS InterPro DOMAIN/s: Protein of unknown function Cys-rich (InterPro:IPR006461), Protein of unknown function DUF2985 (InterPro:IPR021369); BEST Arabidopsis thaliana protein match is: PLAC8 fami…
XLOC_021447	XLOC_021447	AT4G34240	Chr4:16389583-16392824	WT	18	OK	4.19425	2.04898	-1.0335	-2.34533	0.0001	0.00115693	AT4G34240.1	Aldehyde dehydrogenase induced by ABA and dehydration
XLOC_001163	XLOC_001163	AT1G23410	Chr1:8314923-8315531	WT	18	OK	27.0728	13.2231	-1.03379	-3.50115	5e-05	0.000622834	AT1G23410.1	Ribosomal protein S27a / Ubiquitin family protein; FUNCTIONS IN: structural constituent of ribosome; INVOLVED IN: protein ubiquitination involved in ubiquitin-dependent protein catabolic process, translation; LOCATED IN: cytosolic small ribosomal subunit, plasma membrane; EXPRESSED IN: 21 plant structures; EXPRESSED DURING: 11 growth stages; CONTAINS InterPro DOMAIN/s: Ubiquitin subgroup (InterPr…
XLOC_005368	XLOC_005368	AT1G27770	Chr1:9671637-9676157	WT	18	OK	175.321	85.6239	-1.03392	-2.76362	5e-05	0.000622834	AT1G27770.1	Encodes a chloroplast envelope Ca2+-ATPase with an N-terminal autoinhibitor.
XLOC_013609	XLOC_013609	AT3G11930	Chr3:3776236-3777694	WT	18	OK	188.222	91.6816	-1.03773	-3.65482	5e-05	0.000622834	AT3G11930.3	Adenine nucleotide alpha hydrolases-like superfamily protein; FUNCTIONS IN: molecular_function unknown; INVOLVED IN: response to stress; LOCATED IN: cellular_component unknown; EXPRESSED IN: 18 plant structures; EXPRESSED DURING: 9 growth stages; CONTAINS InterPro DOMAIN/s: UspA (InterPro:IPR006016), Rossmann-like alpha/beta/alpha sandwich fold (InterPro:IPR014729), Universal stress protein A (In…
XLOC_010553	XLOC_010553	AT2G01880	Chr2:391422-394059	WT	18	OK	23.9864	11.6608	-1.04054	-3.20704	5e-05	0.000622834	AT2G01880.1	purple acid phosphatase 7 (PAP7); FUNCTIONS IN: protein serine/threonine phosphatase activity, acid phosphatase activity; LOCATED IN: endomembrane system; EXPRESSED IN: 7 plant structures; CONTAINS InterPro DOMAIN/s: Metallophosphoesterase (InterPro:IPR004843); BEST Arabidopsis thaliana protein match is: purple acid phosphatase 17 (TAIR:AT3G17790.1); Has 30201 Blast hits to 17322 proteins in 780 …
XLOC_005480	XLOC_005480	AT1G29980	Chr1:10503277-10506117	WT	18	OK	14.6749	7.12922	-1.04153	-3.13232	5e-05	0.000622834	AT1G29980.1	INVOLVED IN: biological_process unknown; LOCATED IN: plasma membrane, anchored to membrane; EXPRESSED IN: 24 plant structures; EXPRESSED DURING: 13 growth stages; CONTAINS InterPro DOMAIN/s: Protein of unknown function DUF642 (InterPro:IPR006946), Galactose-binding domain-like (InterPro:IPR008979); BEST Arabidopsis thaliana protein match is: Protein of unknown function, DUF642 (TAIR:AT2G34510.1);…
XLOC_013943	XLOC_013943	AT3G18000	Chr3:6154362-6157552	WT	18	OK	11.2874	5.47561	-1.04363	-3.0248	5e-05	0.000622834	AT3G18000.1	Arabidopsis thaliana N-methyltransferase-like protein mRNA. Reduce transmission through pollen.
XLOC_011113	XLOC_011113	AT2G12400	Chr2:5004942-5008322	WT	18	OK	31.4814	15.2532	-1.04539	-3.8792	5e-05	0.000622834	AT2G12400.1	unknown protein; FUNCTIONS IN: molecular_function unknown; INVOLVED IN: biological_process unknown; LOCATED IN: endomembrane system; EXPRESSED IN: 25 plant structures; EXPRESSED DURING: 13 growth stages; BEST Arabidopsis thaliana protein match is: unknown protein (TAIR:AT2G25270.1); Has 177 Blast hits to 172 proteins in 23 species: Archae - 0; Bacteria - 2; Metazoa - 3; Fungi - 0; Plants - 164; V…
XLOC_001589	XLOC_001589	AT1G31710	Chr1:11349839-11355511	WT	18	OK	42.6618	20.6589	-1.04618	-3.31081	5e-05	0.000622834	AT1G31710.1	Copper amine oxidase family protein; FUNCTIONS IN: primary amine oxidase activity, quinone binding, copper ion binding; INVOLVED IN: oxidation reduction, amine metabolic process; LOCATED IN: endomembrane system; EXPRESSED IN: 13 plant structures; EXPRESSED DURING: 8 growth stages; CONTAINS InterPro DOMAIN/s: Copper amine oxidase, N-terminal (InterPro:IPR016182), Copper amine oxidase, N2-terminal …
XLOC_019945	XLOC_019945	AT4G07950	Chr4:4798043-4799795	WT	18	OK	31.7629	15.3802	-1.04627	-3.97882	5e-05	0.000622834	AT4G07950.1	DNA-directed RNA polymerase, subunit M, archaeal; FUNCTIONS IN: in 6 functions; INVOLVED IN: RNA elongation, regulation of transcription, DNA-dependent, transcription, regulation of transcription; LOCATED IN: nucleus, cytoplasm; EXPRESSED IN: male gametophyte; EXPRESSED DURING: M germinated pollen stage; CONTAINS InterPro DOMAIN/s: Zinc finger, TFIIS-type (InterPro:IPR001222), DNA-directed RNA po…
XLOC_009976	XLOC_009976	AT2G38530	Chr2:16128377-16129158	WT	18	OK	21.5498	10.4324	-1.04661	-3.64153	5e-05	0.000622834	AT2G38530.1	Involved in lipid transfer between membranes. Belongs to a family of Lipid transfer proteins. Sequence similarity to other plant/Arabidopsis LPT genes but highest similarity to LPT1. Stress and pathogen-inducible motifs found in the upstream region. Expressed in flower, leaves and siliques but absent in roots. Predicted to be a member of PR-14 pathogenesis-related protein family with the followin…
XLOC_007370	XLOC_007370	AT1G70890	Chr1:26725625-26726544	WT	18	OK	6.57501	3.1811	-1.04747	-2.47902	0.00145	0.0110189	AT1G70890.1	MLP-like protein 43 (MLP43); FUNCTIONS IN: molecular_function unknown; INVOLVED IN: response to biotic stimulus, defense response; LOCATED IN: chloroplast; EXPRESSED IN: 17 plant structures; EXPRESSED DURING: 10 growth stages; CONTAINS InterPro DOMAIN/s: Bet v I allergen (InterPro:IPR000916); BEST Arabidopsis thaliana protein match is: MLP-like protein 28 (TAIR:AT1G70830.5); Has 440 Blast hits to…
XLOC_013598	XLOC_013598	AT3G11700	Chr3:3698838-3701493	WT	18	OK	48.3363	23.3833	-1.04763	-4.0514	5e-05	0.000622834	AT3G11700.1	FASCICLIN-like arabinogalactan protein 18 precursor (FLA18); FUNCTIONS IN: molecular_function unknown; INVOLVED IN: response to cyclopentenone, cell adhesion; LOCATED IN: vacuole; EXPRESSED IN: 23 plant structures; EXPRESSED DURING: 15 growth stages; CONTAINS InterPro DOMAIN/s: FAS1 domain (InterPro:IPR000782); BEST Arabidopsis thaliana protein match is: FASCICLIN-like arabinogalactan protein 17 …
XLOC_015722	XLOC_015722	AT3G54820	Chr3:20302020-20304010	WT	18	OK	65.4745	31.6566	-1.04843	-4.5361	5e-05	0.000622834	AT3G54820.1	plasma membrane intrinsic protein 2;5 (PIP2;5); FUNCTIONS IN: water channel activity; INVOLVED IN: transport, transmembrane transport; LOCATED IN: integral to membrane, membrane; EXPRESSED IN: 17 plant structures; EXPRESSED DURING: 10 growth stages; CONTAINS InterPro DOMAIN/s: Major intrinsic protein, conserved site (InterPro:IPR022357), Aquaporin (InterPro:IPR012269), Major intrinsic protein (In…
XLOC_015160	XLOC_015160	AT3G44320	Chr3:15993378-15995811	WT	18	OK	21.1638	10.2316	-1.04857	-3.11338	5e-05	0.000622834	AT3G44320.1	This enzyme catalyzes the hydrolysis of indole-3-acetonitrile (IAN) to indole-3-acetic acid (IAA) (EC 3.5.5.1) and IAN to indole-3-acetamide (IAM) at lower levels. It is the only one of the four Arabidopsis nitrilases whose mRNA levels are strongly induced when plants experience sulphur deprivation. This enzyme likely participates in other non-auxin-related metabolic pathways.
XLOC_012618	XLOC_012618	AT2G39310	Chr2:16414072-16416815	WT	18	OK	697.521	337.167	-1.04877	-2.67785	5e-05	0.000622834	AT2G39310.1	jacalin-related lectin 22 (JAL22); FUNCTIONS IN: molecular_function unknown; INVOLVED IN: biological_process unknown; LOCATED IN: cellular_component unknown; EXPRESSED IN: 13 plant structures; EXPRESSED DURING: 6 growth stages; CONTAINS InterPro DOMAIN/s: Mannose-binding lectin (InterPro:IPR001229); BEST Arabidopsis thaliana protein match is: jacalin-related lectin 23 (TAIR:AT2G39330.1); Has 2014…
XLOC_029587	XLOC_029587	AT5G38020	Chr5:15165651-15167729	WT	18	OK	67.346	32.5443	-1.04919	-4.33311	5e-05	0.000622834	AT5G38020.1	encodes a protein whose sequence is similar to SAM:salicylic acid carboxyl methyltransferase (SAMT) (GI:6002712)(Clarkia breweri) and to SAM:benzoic acid carboxyl methyltransferase (BAMT)(GI:9789277)(Antirrhinum majus)
XLOC_018303	XLOC_018303	AT3G44990	Chr3:16446974-16448764	WT	18	OK	21.66	10.4499	-1.05154	-3.75358	5e-05	0.000622834	AT3G44990.1	xyloglucan endo-transglycosylase
XLOC_018812	XLOC_018812	AT3G53900	Chr3:19956655-19959041	WT	18	OK	6.44031	3.10618	-1.05199	-2.3369	0.00035	0.00345062	AT3G53900.2	Encodes UPP, a plastidial uracil phosphoribosyltransferase (UPRT) involved in uracil salvage. Loss-of-function mutation causes dramatic growth retardation, a pale-green to albino phenotype, abnormal root morphology and chloroplastic disorders.
XLOC_030191	XLOC_030191	AT5G48530,AT5G48540	Chr5:19661212-19669961	WT	18	OK	112.28	54.1239	-1.05276	-2.99154	5e-05	0.000622834	AT5G48530.1	unknown protein; FUNCTIONS IN: molecular_function unknown; INVOLVED IN: biological_process unknown; LOCATED IN: mitochondrion; BEST Arabidopsis thaliana protein match is: unknown protein (TAIR:AT3G07440.1); Has 32 Blast hits to 32 proteins in 11 species: Archae - 0; Bacteria - 0; Metazoa - 0; Fungi - 0; Plants - 32; Viruses - 0; Other Eukaryotes - 0 (source: NCBI BLink).
XLOC_003148	XLOC_003148	AT1G64355	Chr1:23886083-23887212	WT	18	OK	4.17716	2.01332	-1.05295	-1.85923	0.00365	0.0230693	AT1G64355.1	unknown protein; FUNCTIONS IN: molecular_function unknown; INVOLVED IN: biological_process unknown; LOCATED IN: chloroplast; EXPRESSED IN: 23 plant structures; EXPRESSED DURING: 13 growth stages; CONTAINS InterPro DOMAIN/s: Protein of unknown function DUF3593 (InterPro:IPR021995); Has 301 Blast hits to 301 proteins in 96 species: Archae - 0; Bacteria - 143; Metazoa - 0; Fungi - 0; Plants - 44; Vi…
XLOC_024348	XLOC_024348	AT5G04360	Chr5:1221561-1228678	WT	18	OK	1.48199	0.714048	-1.05344	-1.63599	0.00425	0.026173	AT5G04360.1	Encodes an enzyme thought to be involved in the hydrolysis of the &#945;-1,6 linkages during starch degradation in seed endosperm. However, a knockout mutant of Arabidopsis lacking limit dextrinase has normal rates of starch degradation in the leaf at night, indicating that more than one isoamylases might be involved in this process.
XLOC_016715	XLOC_016715	AT3G11280	Chr3:3533254-3534847	WT	18	OK	38.6251	18.6099	-1.05347	-3.622	5e-05	0.000622834	AT3G11280.1	Putative transcription factors interacting with the gene product of VHA-B1 (vacuolar ATPase subunit B1; as shown through yeast two-hybrid assay).
XLOC_009348	XLOC_009348	AT2G26760	Chr2:11401328-11403427	WT	18	OK	8.23672	3.96759	-1.05381	-3.03476	5e-05	0.000622834	AT2G26760.1	Cyclin B1;4 (CYCB1;4); FUNCTIONS IN: cyclin-dependent protein kinase regulator activity; INVOLVED IN: regulation of cell cycle; LOCATED IN: nucleus; EXPRESSED IN: 13 plant structures; EXPRESSED DURING: 6 growth stages; CONTAINS InterPro DOMAIN/s: Cyclin, C-terminal (InterPro:IPR004367), Cyclin-like (InterPro:IPR011028), Cyclin-related (InterPro:IPR013763), Cyclin, N-terminal (InterPro:IPR006671),…
XLOC_020647	XLOC_020647	AT4G18890	Chr4:10352444-10355572	WT	18	OK	63.2792	30.4811	-1.05381	-3.39091	5e-05	0.000622834	AT4G18890.1	BES1/BZR1 homolog 3 (BEH3); CONTAINS InterPro DOMAIN/s: BZR1, transcriptional repressor (InterPro:IPR008540); BEST Arabidopsis thaliana protein match is: BES1/BZR1 homolog 4 (TAIR:AT1G78700.1); Has 411 Blast hits to 325 proteins in 33 species: Archae - 0; Bacteria - 8; Metazoa - 41; Fungi - 2; Plants - 260; Viruses - 2; Other Eukaryotes - 98 (source: NCBI BLink).
XLOC_016979	XLOC_016979	AT3G15810	Chr3:5347821-5349288	WT	18	OK	80.5696	38.7965	-1.05431	-4.39721	5e-05	0.000622834	AT3G15810.1	Protein of unknown function (DUF567); CONTAINS InterPro DOMAIN/s: Protein of unknown function DUF567 (InterPro:IPR007612); BEST Arabidopsis thaliana protein match is: Protein of unknown function (DUF567) (TAIR:AT1G80120.1); Has 436 Blast hits to 435 proteins in 18 species: Archae - 0; Bacteria - 0; Metazoa - 0; Fungi - 7; Plants - 429; Viruses - 0; Other Eukaryotes - 0 (source: NCBI BLink).
XLOC_011186	XLOC_011186	AT2G13550	Chr2:5648363-5649902	WT	18	OK	8.98115	4.32269	-1.05497	-2.51034	5e-05	0.000622834	AT2G13550.1	unknown protein; Has 23 Blast hits to 20 proteins in 10 species: Archae - 0; Bacteria - 0; Metazoa - 10; Fungi - 0; Plants - 4; Viruses - 0; Other Eukaryotes - 9 (source: NCBI BLink).
XLOC_012301	XLOC_012301	AT2G33580	Chr2:14219622-14221861	WT	18	OK	44.5777	21.4531	-1.05513	-3.88378	5e-05	0.000622834	AT2G33580.1	Encodes a LysM-containing receptor-like kinase. Induction of chitin-responsive genes by chitin treatment is not blocked in the mutant.
XLOC_003500	XLOC_003500	AT1G70700	Chr1:26654767-26657064	WT	18	OK	8.41823	4.04979	-1.05567	-2.58112	5e-05	0.000622834	AT1G70700.1	JAZ9 is a protein presumed to be involved in jasmonate signaling. JAZ9 transcript levels rise in response to a jasmonate stimulus. JAZ9 can interact with the COI1 F-box subunit of an SCF E3 ubiquitin ligase in a yeast-two-hybrid assay only in the presence of jasmonate-isoleucine (JA-ILE) or coronatine. The Jas domain appears to be important for JAZ9-COI1 interactions in the presence of coronatine…
XLOC_024208	XLOC_024208	AT5G01870	Chr5:337176-337820	WT	18	OK	71.2832	34.2863	-1.05593	-4.8704	5e-05	0.000622834	AT5G01870.1	Predicted to encode a PR (pathogenesis-related) protein. Belongs to the lipid transfer protein (PR-14) family with the following members: At2g38540/LTP1, At2g38530/LTP2, At5g59320/LTP3, At5g59310/LTP4, At3g51600/LTP5, At3g08770/LTP6, At2g15050/LTP7, At2g18370/LTP8, At2g15325/LTP9, At5g01870/LTP10, At4g33355/LTP11, At3g51590/LTP12, At5g44265/LTP13, At5g62065/LTP14, At4g08530/LTP15.
XLOC_016811	XLOC_016811	AT3G12870	Chr3:4094416-4095037	WT	18	OK	11.3049	5.43651	-1.0562	-3.00098	0.00055	0.00498267	AT3G12870.1	unknown protein; BEST Arabidopsis thaliana protein match is: unknown protein (TAIR:AT5G56120.1); Has 70 Blast hits to 70 proteins in 12 species: Archae - 0; Bacteria - 0; Metazoa - 0; Fungi - 0; Plants - 70; Viruses - 0; Other Eukaryotes - 0 (source: NCBI BLink).
XLOC_028493	XLOC_028493	AT5G17420	Chr5:5727639-5741465	WT	18	OK	17.9418	8.62738	-1.05633	-2.19322	0.0004	0.00385261	AT5G17420.1	Encodes a xylem-specific cellulose synthase that is phosphorylated on one or more serine residues (on either S185 or one of S180 or S181).
XLOC_013016	XLOC_013016	AT2G46760	Chr2:19213027-19215166	WT	18	OK	3.01077	1.44755	-1.05651	-2.3606	0.0006	0.00536361	AT2G46760.1	D-arabinono-1,4-lactone oxidase family protein; FUNCTIONS IN: oxidoreductase activity, D-arabinono-1,4-lactone oxidase activity, FAD binding, catalytic activity; INVOLVED IN: oxidation reduction; LOCATED IN: membrane; EXPRESSED IN: inflorescence meristem, sperm cell, hypocotyl, flower; EXPRESSED DURING: petal differentiation and expansion stage; CONTAINS InterPro DOMAIN/s: D-arabinono-1,4-lactone…
XLOC_030400	XLOC_030400	AT5G52330	Chr5:21247435-21250425	WT	18	OK	3.12414	1.50033	-1.05818	-1.87557	0.00075	0.00645449	AT5G52330.1	TRAF-like superfamily protein; CONTAINS InterPro DOMAIN/s: TRAF-like (InterPro:IPR008974), MATH (InterPro:IPR002083), TRAF-type (InterPro:IPR013322); BEST Arabidopsis thaliana protein match is: TRAF-like superfamily protein (TAIR:AT1G04300.1); Has 1080 Blast hits to 1018 proteins in 130 species: Archae - 0; Bacteria - 2; Metazoa - 66; Fungi - 144; Plants - 828; Viruses - 0; Other Eukaryotes - 40 …
XLOC_027102	XLOC_027102	AT5G56300	Chr5:22799506-22801692	WT	18	OK	2.27462	1.09227	-1.0583	-1.94047	0.00535	0.0312779	AT5G56300.1	A member of the Arabidopsis SABATH methyltransferase gene family. Encodes GAMT2, a methyltransferase that uses S-adenosine-L-methionine (SAM) as a methyl donor to methylate the carboxyl group of GAs, resulting in the methyl esters of GAs (MeGAs). Expressed most highly in the siliques during seed development.
XLOC_009393	XLOC_009393	AT2G27810	Chr2:11852079-11856294	WT	18	OK	7.52893	3.61501	-1.05844	-3.25211	5e-05	0.000622834	AT2G27810.1	nucleobase-ascorbate transporter 12 (NAT12); FUNCTIONS IN: transmembrane transporter activity; INVOLVED IN: transport, transmembrane transport; LOCATED IN: plasma membrane, membrane; EXPRESSED IN: 22 plant structures; EXPRESSED DURING: 13 growth stages; CONTAINS InterPro DOMAIN/s: Xanthine/uracil/vitamin C permease (InterPro:IPR006043); BEST Arabidopsis thaliana protein match is: Xanthine/uracil …
XLOC_020197	XLOC_020197	AT4G11211	Chr4:6836105-6836588	WT	18	OK	17.0542	8.18718	-1.05869	-3.40728	0.00055	0.00498267	AT4G11211.1	unknown protein; Has 35333 Blast hits to 34131 proteins in 2444 species: Archae - 798; Bacteria - 22429; Metazoa - 974; Fungi - 991; Plants - 531; Viruses - 0; Other Eukaryotes - 9610 (source: NCBI BLink).
XLOC_015443	XLOC_015443	AT3G49330	Chr3:18291487-18292048	WT	18	OK	6.33527	3.03881	-1.0599	-2.3646	0.00555	0.0321896	AT3G49330.1	Plant invertase/pectin methylesterase inhibitor superfamily protein; FUNCTIONS IN: enzyme inhibitor activity, pectinesterase inhibitor activity, pectinesterase activity; INVOLVED IN: biological_process unknown; LOCATED IN: endomembrane system; CONTAINS InterPro DOMAIN/s: Pectinesterase inhibitor (InterPro:IPR006501); BEST Arabidopsis thaliana protein match is: Plant invertase/pectin methylesteras…
XLOC_010250	XLOC_010250	AT2G43690	Chr2:18112588-18114583	WT	18	OK	1.26667	0.607496	-1.0601	-1.81386	0.00825	0.0435965	AT2G43690.1	Concanavalin A-like lectin protein kinase family protein; FUNCTIONS IN: kinase activity; INVOLVED IN: protein amino acid phosphorylation; LOCATED IN: endomembrane system; EXPRESSED IN: 19 plant structures; EXPRESSED DURING: 9 growth stages; CONTAINS InterPro DOMAIN/s: Legume lectin, beta chain (InterPro:IPR001220), Serine/threonine-protein kinase-like domain (InterPro:IPR017442), Concanavalin A-l…
XLOC_002385	XLOC_002385	AT1G49840	Chr1:18452062-18454635	WT	18	OK	6.8779	3.29745	-1.06062	-2.7689	5e-05	0.000622834	AT1G49840.1	Protein of unknown function (DUF620); FUNCTIONS IN: molecular_function unknown; INVOLVED IN: biological_process unknown; LOCATED IN: chloroplast; EXPRESSED IN: 23 plant structures; EXPRESSED DURING: 13 growth stages; CONTAINS InterPro DOMAIN/s: Protein of unknown function DUF620 (InterPro:IPR006873); BEST Arabidopsis thaliana protein match is: Protein of unknown function (DUF620) (TAIR:AT3G19540.…
XLOC_003632	XLOC_003632	AT1G73570	Chr1:27650991-27653942	WT	18	OK	1.3202	0.632616	-1.06135	-1.76097	0.0088	0.0457178	AT1G73570.1	HCP-like superfamily protein; FUNCTIONS IN: binding; INVOLVED IN: biological_process unknown; LOCATED IN: endomembrane system; EXPRESSED IN: 6 plant structures; EXPRESSED DURING: petal differentiation and expansion stage, E expanded cotyledon stage, D bilateral stage; CONTAINS InterPro DOMAIN/s: Tetratricopeptide-like helical (InterPro:IPR011990), Sel1-like (InterPro:IPR006597); BEST Arabidopsis …
XLOC_004900	XLOC_004900	AT1G18140	Chr1:6238843-6241687	WT	18	OK	5.70353	2.7326	-1.06158	-2.62137	5e-05	0.000622834	AT1G18140.1	putative laccase, a member of laccase family of genes (with 17 members in Arabidopsis).
XLOC_010298	XLOC_010298	AT2G44480	Chr2:18359733-18363180	WT	18	OK	8.26558	3.95836	-1.06221	-2.80202	5e-05	0.000622834	AT2G44480.1	beta glucosidase 17 (BGLU17); FUNCTIONS IN: cation binding, hydrolase activity, hydrolyzing O-glycosyl compounds, catalytic activity; INVOLVED IN: carbohydrate metabolic process; LOCATED IN: endomembrane system; EXPRESSED IN: stem, hypocotyl, sepal, male gametophyte, root; EXPRESSED DURING: 4 anthesis; CONTAINS InterPro DOMAIN/s: Glycoside hydrolase, family 1 (InterPro:IPR001360), Glycoside hydro…
XLOC_027982	XLOC_027982	AT5G07030	Chr5:2183359-2185972	WT	18	OK	49.3548	23.6308	-1.06252	-4.43929	5e-05	0.000622834	AT5G07030.1	Eukaryotic aspartyl protease family protein; FUNCTIONS IN: aspartic-type endopeptidase activity; INVOLVED IN: proteolysis; LOCATED IN: cell wall, plant-type cell wall; EXPRESSED IN: 23 plant structures; EXPRESSED DURING: 13 growth stages; CONTAINS InterPro DOMAIN/s: Peptidase aspartic, catalytic (InterPro:IPR009007), Peptidase aspartic (InterPro:IPR021109), Peptidase A1 (InterPro:IPR001461); BEST…
XLOC_025010	XLOC_025010	AT5G18470	Chr5:6127796-6134057	WT	18	OK	56.6046	27.0969	-1.06279	-1.86086	0.0073	0.0397376	AT5G18470.1	Curculin-like (mannose-binding) lectin family protein; FUNCTIONS IN: sugar binding; INVOLVED IN: response to karrikin; LOCATED IN: plant-type cell wall; EXPRESSED IN: 22 plant structures; EXPRESSED DURING: 12 growth stages; CONTAINS InterPro DOMAIN/s: Curculin-like (mannose-binding) lectin (InterPro:IPR001480); BEST Arabidopsis thaliana protein match is: lectin protein kinase family protein (TAIR…
XLOC_011637	XLOC_011637	AT2G21540	Chr2:9219323-9224496	WT	18	OK	2.82847	1.35044	-1.0666	-2.09915	0.00055	0.00498267	AT2G21540.1	SEC14-like 3 (SFH3); FUNCTIONS IN: phosphatidylinositol transporter activity; INVOLVED IN: flower development, transport; LOCATED IN: intracellular; EXPRESSED IN: 25 plant structures; EXPRESSED DURING: 17 growth stages; CONTAINS InterPro DOMAIN/s: Cellular retinaldehyde-binding/triple function, C-terminal (InterPro:IPR001251), Cellular retinaldehyde-binding/triple function, N-terminal (InterPro:I…
XLOC_027477	XLOC_027477	AT5G63770	Chr5:25518556-25523621	WT	18	OK	52.0828	24.8553	-1.06726	-3.56425	5e-05	0.000622834	AT5G63770.1	a member of the diacylglycerol kinase gene family. Encodes a functional diacylglycerol kinase. Involved in root elongation and plant development. Gene expression is induced by wounding or cold.
XLOC_027480	XLOC_027480	AT5G63810	Chr5:25537073-25541529	WT	18	OK	3.14486	1.50073	-1.06733	-2.60583	5e-05	0.000622834	AT5G63810.1	member of Glycoside Hydrolase Family 35
XLOC_012921	XLOC_012921	AT2G44798	Chr2:18466012-18471528	WT	18	OK	70.037	33.421	-1.06736	-3.36985	5e-05	0.000622834	AT2G44798.1	Potential natural antisense gene, locus overlaps with AT2G44800
XLOC_003046	XLOC_003046	AT1G62480	Chr1:23128704-23129759	WT	18	OK	451.669	215.416	-1.06814	-4.16053	5e-05	0.000622834	AT1G62480.1	Vacuolar calcium-binding protein-related; INVOLVED IN: response to cadmium ion, response to salt stress; LOCATED IN: cellular_component unknown; EXPRESSED IN: 23 plant structures; EXPRESSED DURING: 13 growth stages; Has 21787 Blast hits to 9668 proteins in 1087 species: Archae - 111; Bacteria - 3941; Metazoa - 6730; Fungi - 2179; Plants - 741; Viruses - 179; Other Eukaryotes - 7906 (source: NCBI …
XLOC_015846	XLOC_015846	AT3G57200	Chr3:21169264-21172316	WT	18	OK	2.16088	1.02949	-1.06969	-2.19448	0.00235	0.016259	AT3G57200.1	unknown protein; BEST Arabidopsis thaliana protein match is: unknown protein (TAIR:AT2G41451.1); Has 94 Blast hits to 94 proteins in 31 species: Archae - 0; Bacteria - 12; Metazoa - 0; Fungi - 0; Plants - 77; Viruses - 0; Other Eukaryotes - 5 (source: NCBI BLink).
XLOC_003409	XLOC_003409	AT1G69040	Chr1:25957818-25960307	WT	18	OK	22.3329	10.6295	-1.07109	-3.42849	5e-05	0.000622834	AT1G69040.2	ACT-domain containing protein involved in feedback regulation of amino acid metabolism
XLOC_012340	XLOC_012340	AT2G34300,AT2G34310	Chr2:14473650-14480093	WT	18	OK	185.263	87.9885	-1.07419	-3.02746	5e-05	0.000622834	AT2G34300.1	S-adenosyl-L-methionine-dependent methyltransferases superfamily protein; CONTAINS InterPro DOMAIN/s: Protein of unknown function DUF248, methyltransferase putative (InterPro:IPR004159); BEST Arabidopsis thaliana protein match is: S-adenosyl-L-methionine-dependent methyltransferases superfamily protein (TAIR:AT1G29470.2); Has 54799 Blast hits to 24520 proteins in 1584 species: Archae - 172; Bacte…
XLOC_030569	XLOC_030569	AT5G55730	Chr5:22558147-22560461	WT	18	OK	6.83392	3.24452	-1.07471	-2.69244	0.0001	0.00115693	AT5G55730.1	Encodes fasciclin-like arabinogalactan-protein 1 (Fla1). fla1 mutants show defects in shoot regeneration.
XLOC_020751	XLOC_020751	AT4G20940	Chr4:11201952-11206280	WT	18	OK	3.07736	1.46089	-1.07485	-2.72556	5e-05	0.000622834	AT4G20940.1	Leucine-rich receptor-like protein kinase family protein; FUNCTIONS IN: protein serine/threonine kinase activity, protein kinase activity, ATP binding; INVOLVED IN: signal transduction, N-terminal protein myristoylation; LOCATED IN: plasma membrane; CONTAINS InterPro DOMAIN/s: Serine/threonine-protein kinase domain (InterPro:IPR002290), Leucine-rich repeat-containing N-terminal domain, type 2 (In…
XLOC_008777	XLOC_008777	AT2G16890	Chr2:7316888-7319181	WT	18	OK	12.0353	5.71152	-1.07533	-2.98984	5e-05	0.000622834	AT2G16890.2	UDP-Glycosyltransferase superfamily protein; FUNCTIONS IN: transferase activity, transferring hexosyl groups, UDP-glycosyltransferase activity, transferase activity, transferring glycosyl groups; INVOLVED IN: metabolic process; LOCATED IN: endomembrane system; EXPRESSED IN: 17 plant structures; EXPRESSED DURING: 7 growth stages; CONTAINS InterPro DOMAIN/s: UDP-glucuronosyl/UDP-glucosyltransferase…
XLOC_001176	XLOC_001176	AT1G23750	Chr1:8400150-8401487	WT	18	OK	3.77995	1.79226	-1.07659	-2.12849	0.00345	0.0221403	AT1G23750.1	Nucleic acid-binding, OB-fold-like protein; CONTAINS InterPro DOMAIN/s: Nucleic acid-binding, OB-fold-like (InterPro:IPR016027), Nucleic acid-binding, OB-fold (InterPro:IPR012340); BEST Arabidopsis thaliana protein match is: Nucleic acid-binding, OB-fold-like protein (TAIR:AT1G10590.2); Has 249 Blast hits to 249 proteins in 61 species: Archae - 55; Bacteria - 0; Metazoa - 0; Fungi - 0; Plants - 1…
XLOC_015941	XLOC_015941	AT3G59350	Chr3:21932290-21935192	WT	18	OK	255.111	120.919	-1.07708	-3.31158	5e-05	0.000622834	AT3G59350.1	Protein kinase superfamily protein; FUNCTIONS IN: protein tyrosine kinase activity, protein kinase activity, kinase activity, ATP binding; INVOLVED IN: protein amino acid phosphorylation; LOCATED IN: plasma membrane; EXPRESSED IN: 24 plant structures; EXPRESSED DURING: 15 growth stages; CONTAINS InterPro DOMAIN/s: Protein kinase, ATP binding site (InterPro:IPR017441), Protein kinase, catalytic do…
XLOC_030404	XLOC_030404	AT5G52390	Chr5:21263935-21265264	WT	18	OK	169.229	80.193	-1.07743	-4.50613	5e-05	0.000622834	AT5G52390.1	PAR1 protein; FUNCTIONS IN: molecular_function unknown; INVOLVED IN: biological_process unknown; LOCATED IN: endomembrane system; EXPRESSED IN: 13 plant structures; EXPRESSED DURING: 8 growth stages; CONTAINS InterPro DOMAIN/s: PAR1 (InterPro:IPR009489); BEST Arabidopsis thaliana protein match is: PAR1 protein (TAIR:AT3G54040.1); Has 1807 Blast hits to 1807 proteins in 277 species: Archae - 0; Ba…
XLOC_003015	XLOC_003015	AT1G61840	Chr1:22847388-22849833	WT	18	OK	27.5577	13.0583	-1.07749	-4.10419	5e-05	0.000622834	AT1G61840.1	Cysteine/Histidine-rich C1 domain family protein; FUNCTIONS IN: zinc ion binding; INVOLVED IN: intracellular signaling pathway; LOCATED IN: cellular_component unknown; CONTAINS InterPro DOMAIN/s: Protein kinase C-like, phorbol ester/diacylglycerol binding (InterPro:IPR002219), DC1 (InterPro:IPR004146), Zinc finger, PHD-type (InterPro:IPR001965), C1-like (InterPro:IPR011424); BEST Arabidopsis thal…
XLOC_029887	XLOC_029887	AT5G43270	Chr5:17360286-17363773	WT	18	OK	16.6748	7.901	-1.07756	-3.36559	5e-05	0.000622834	AT5G43270.2	member of the SPL (squamosa-promoter binding protein-like) gene family, a novel gene family encoding DNA binding proteins and putative transcription factors. In conjunction with SPL10 and SPL11, SPL2 redundantly controls proper development of lateral organs in association with shoot maturation in the reproductive phase.
XLOC_019819	XLOC_019819	AT4G06598	Chr4:3663484-3667784	WT	18	OK	8.52307	4.03708	-1.07806	-1.91611	0.0049	0.0292317	AT4G06598.1	BEST Arabidopsis thaliana protein match is: Basic-leucine zipper (bZIP) transcription factor family protein (TAIR:AT1G58110.2); Has 392 Blast hits to 388 proteins in 30 species: Archae - 0; Bacteria - 0; Metazoa - 15; Fungi - 8; Plants - 363; Viruses - 0; Other Eukaryotes - 6 (source: NCBI BLink).
XLOC_022865	XLOC_022865	AT4G16141	Chr4:9131649-9133156	WT	18	OK	25.0241	11.846	-1.07892	-3.69967	5e-05	0.000622834	AT4G16141.1	GATA type zinc finger transcription factor family protein; FUNCTIONS IN: sequence-specific DNA binding, zinc ion binding, sequence-specific DNA binding transcription factor activity; INVOLVED IN: regulation of transcription, DNA-dependent; CONTAINS InterPro DOMAIN/s: Zinc finger, NHR/GATA-type (InterPro:IPR013088), Zinc finger, GATA-type (InterPro:IPR000679); BEST Arabidopsis thaliana protein mat…
XLOC_031083	XLOC_031083	AT5G65920	Chr5:26363866-26366056	WT	18	OK	17.2338	8.15737	-1.07907	-3.50815	5e-05	0.000622834	AT5G65920.1	ARM repeat superfamily protein; FUNCTIONS IN: ubiquitin-protein ligase activity, binding; INVOLVED IN: protein ubiquitination; LOCATED IN: ubiquitin ligase complex; CONTAINS InterPro DOMAIN/s: U box domain (InterPro:IPR003613), Armadillo-like helical (InterPro:IPR011989), Armadillo-type fold (InterPro:IPR016024); BEST Arabidopsis thaliana protein match is: ARM repeat superfamily protein (TAIR:AT3…
XLOC_031154	XLOC_031154	AT5G67245	Chr5:26828614-26829795	WT	18	OK	9.29106	4.39652	-1.07948	-1.78146	0.0049	0.0292317	AT5G67245.1	unknown protein; FUNCTIONS IN: molecular_function unknown; INVOLVED IN: biological_process unknown; LOCATED IN: mitochondrion; BEST Arabidopsis thaliana protein match is: unknown protein (TAIR:AT5G65609.1); Has 35333 Blast hits to 34131 proteins in 2444 species: Archae - 798; Bacteria - 22429; Metazoa - 974; Fungi - 991; Plants - 531; Viruses - 0; Other Eukaryotes - 9610 (source: NCBI BLink).
XLOC_004618	XLOC_004618	AT1G12500	Chr1:4263149-4265044	WT	18	OK	30.8379	14.5918	-1.07955	-4.35045	5e-05	0.000622834	AT1G12500.1	Nucleotide-sugar transporter family protein; FUNCTIONS IN: organic anion transmembrane transporter activity; LOCATED IN: membrane; EXPRESSED IN: 22 plant structures; EXPRESSED DURING: 13 growth stages; CONTAINS InterPro DOMAIN/s: Protein of unknown function DUF6, transmembrane (InterPro:IPR000620), Protein of unknown function DUF250 (InterPro:IPR004853); BEST Arabidopsis thaliana protein match is…
XLOC_007698	XLOC_007698	AT1G77690	Chr1:29200940-29203340	WT	18	OK	42.0474	19.8943	-1.07966	-4.39235	5e-05	0.000622834	AT1G77690.1	Encodes an auxin influx carrier LAX3 (Like Aux1) that promotes lateral root emergence. Auxin-induced expression of LAX3 in turn induces a selection of cell-wall-remodelling enzymes, which are likely to promote cell separation in advance of developing lateral root primordia.
XLOC_013921	XLOC_013921	AT3G17609,AT3G17611	Chr3:6023865-6027694	WT	18	OK	33.1373	15.6779	-1.07973	-3.5228	5e-05	0.000622834	AT3G17609.2	Encodes a homolog of HY5 (HYH). Involved in phyB signaling pathway.
XLOC_021844	XLOC_021844	AT4G01540	Chr4:667147-672789	WT	18	OK	44.5103	21.058	-1.07977	-3.14409	5e-05	0.000622834	AT4G01540.1	Encodes a membrane-bound NAC (for NAM, ATAF1/2, CUC2) transcription factor, designated NTM1 (for NAC with transmembrane motif1). NTM1 regulates cell division in Arabidopsis.
XLOC_028390	XLOC_028390	AT5G15350	Chr5:4984958-4986239	WT	18	OK	104.935	49.6183	-1.08055	-4.71598	5e-05	0.000622834	AT5G15350.1	early nodulin-like protein 17 (ENODL17); FUNCTIONS IN: electron carrier activity, copper ion binding; LOCATED IN: anchored to plasma membrane, plasma membrane, vacuole, anchored to membrane; EXPRESSED IN: 24 plant structures; EXPRESSED DURING: 13 growth stages; CONTAINS InterPro DOMAIN/s: Plastocyanin-like (InterPro:IPR003245), Cupredoxin (InterPro:IPR008972); BEST Arabidopsis thaliana protein ma…
XLOC_003701	XLOC_003701	AT1G74930	Chr1:28144131-28145049	WT	18	OK	18.5338	8.76178	-1.08086	-3.33318	5e-05	0.000622834	AT1G74930.1	encodes a member of the DREB subfamily A-5 of ERF/AP2 transcription factor family. The protein contains one AP2 domain. There are 15 members in this subfamily including RAP2.1, RAP2.9 and RAP2.10.
XLOC_018898	XLOC_018898	AT3G55430	Chr3:20549598-20552215	WT	18	OK	209.415	98.9254	-1.08195	-3.93532	5e-05	0.000622834	AT3G55430.1	O-Glycosyl hydrolases family 17 protein; FUNCTIONS IN: cation binding, hydrolase activity, hydrolyzing O-glycosyl compounds, catalytic activity; INVOLVED IN: carbohydrate metabolic process; LOCATED IN: cell wall; EXPRESSED IN: 24 plant structures; EXPRESSED DURING: 15 growth stages; CONTAINS InterPro DOMAIN/s: X8 (InterPro:IPR012946), Glycoside hydrolase, catalytic core (InterPro:IPR017853), Glyc…
XLOC_012240	XLOC_012240	AT2G32500	Chr2:13794425-13797229	WT	18	OK	1.55046	0.732406	-1.08198	-1.76588	0.00405	0.0251444	AT2G32500.1	Stress responsive alpha-beta barrel domain protein; CONTAINS InterPro DOMAIN/s: Stress responsive alpha-beta barrel (InterPro:IPR013097), Dimeric alpha-beta barrel (InterPro:IPR011008); BEST Arabidopsis thaliana protein match is: Stress responsive alpha-beta barrel domain protein (TAIR:AT2G31670.1); Has 68 Blast hits to 66 proteins in 17 species: Archae - 0; Bacteria - 4; Metazoa - 0; Fungi - 0; …
XLOC_012319	XLOC_012319	AT2G33850	Chr2:14321061-14322049	WT	18	OK	20.4688	9.66881	-1.08201	-3.62007	5e-05	0.000622834	AT2G33850.1	unknown protein; FUNCTIONS IN: molecular_function unknown; INVOLVED IN: biological_process unknown; LOCATED IN: endomembrane system; EXPRESSED IN: 17 plant structures; EXPRESSED DURING: 9 growth stages; BEST Arabidopsis thaliana protein match is: unknown protein (TAIR:AT1G28400.1); Has 3053 Blast hits to 2119 proteins in 133 species: Archae - 6; Bacteria - 52; Metazoa - 135; Fungi - 96; Plants - …
XLOC_009854	XLOC_009854	AT2G36220	Chr2:15192479-15195562	WT	18	OK	104.389	49.2754	-1.08303	-3.99975	5e-05	0.000622834	AT2G36220.1	unknown protein; BEST Arabidopsis thaliana protein match is: unknown protein (TAIR:AT3G52710.1); Has 74 Blast hits to 74 proteins in 10 species: Archae - 0; Bacteria - 0; Metazoa - 0; Fungi - 0; Plants - 74; Viruses - 0; Other Eukaryotes - 0 (source: NCBI BLink).
XLOC_022906	XLOC_022906	AT4G16700	Chr4:9394172-9398308	WT	18	OK	4.97378	2.34251	-1.08629	-1.67692	0.0051	0.030077	AT4G16700.1	Encodes a mitochondrial phosphatidylserine decarboxylase. Expressed mainly in roots and flowers.
XLOC_003531	XLOC_003531	AT1G71400	Chr1:26909720-26920263	WT	18	OK	70.3628	33.116	-1.08728	-2.92293	5e-05	0.000622834	AT1G71400.1	Encodes a CLAVATA2 (CLV2)-related gene. Complements the clv2 mutant when expressed under the control of the CLV2 promoter.
XLOC_010788	XLOC_010788	AT2G05940	Chr2:2287237-2291219	WT	18	OK	250.723	118.001	-1.0873	-3.18375	5e-05	0.000622834	AT2G05940.1	Encodes a receptor-like cytoplasmic kinase that phosphorylates the host target RIN4, leading to the activation of a plant innate immune receptor RPM1.
XLOC_001085	XLOC_001085	AT1G21910	Chr1:7696535-7697699	WT	18	OK	97.7519	45.9953	-1.08764	-4.68225	5e-05	0.000622834	AT1G21910.1	encodes a member of the DREB subfamily A-5 of ERF/AP2 transcription factor family. The protein contains one AP2 domain. There are 15 members in this subfamily including RAP2.1, RAP2.9 and RAP2.10.
XLOC_003429	XLOC_003429	AT1G69430	Chr1:26097786-26099388	WT	18	OK	3.51384	1.65319	-1.0878	-2.53661	0.00035	0.00345062	AT1G69430.1	unknown protein; BEST Arabidopsis thaliana protein match is: unknown protein (TAIR:AT1G26650.1); Has 216 Blast hits to 215 proteins in 17 species: Archae - 0; Bacteria - 0; Metazoa - 0; Fungi - 0; Plants - 216; Viruses - 0; Other Eukaryotes - 0 (source: NCBI BLink).
XLOC_013618	XLOC_013618	AT3G12110	Chr3:3857842-3859798	WT	18	OK	22.6286	10.6434	-1.08819	-3.8818	5e-05	0.000622834	AT3G12110.1	Encodes an actin that is expressed predominantly during reproductive development.
XLOC_007363	XLOC_007363	AT1G70830	Chr1:26709946-26711462	WT	18	OK	3.5016	1.64384	-1.09095	-1.70277	0.00105	0.008471	AT1G70830.1	MLP-like protein 28 (MLP28); FUNCTIONS IN: molecular_function unknown; INVOLVED IN: response to biotic stimulus, defense response; LOCATED IN: cellular_component unknown; EXPRESSED IN: 22 plant structures; EXPRESSED DURING: 14 growth stages; CONTAINS InterPro DOMAIN/s: Bet v I allergen (InterPro:IPR000916); BEST Arabidopsis thaliana protein match is: MLP-like protein 34 (TAIR:AT1G70850.3); Has 82…
XLOC_028800	XLOC_028800	AT5G23870	Chr5:8045843-8050175	WT	18	OK	2.89637	1.3596	-1.09106	-2.01689	0.0009	0.00748109	AT5G23870.3	Pectinacetylesterase family protein; FUNCTIONS IN: carboxylesterase activity; INVOLVED IN: biological_process unknown; LOCATED IN: plant-type cell wall; EXPRESSED IN: 22 plant structures; EXPRESSED DURING: 13 growth stages; CONTAINS InterPro DOMAIN/s: Pectinacetylesterase (InterPro:IPR004963); BEST Arabidopsis thaliana protein match is: Pectinacetylesterase family protein (TAIR:AT3G62060.1); Has …
XLOC_011745	XLOC_011745	AT2G23610	Chr2:10044178-10046532	WT	18	OK	45.1299	21.1611	-1.09267	-4.26563	5e-05	0.000622834	AT2G23610.1	Encodes a protein shown to have carboxylesterase activity, methyl IAA esterase activity, and methyl jasmonate esterase activity in vitro. This protein does not act on methyl salicylate, MeGA4, or MEGA9 in vitro.
XLOC_028393	XLOC_028393	AT5G15410	Chr5:5003306-5006882	WT	18	OK	1.10946	0.519773	-1.0939	-1.73125	0.00415	0.0256382	AT5G15410.1	'defense, no death' gene (DND1) encodes a mutated cyclic nucleotide-gated cation channel; Same as CNGC2 (article ID 229): Cyclic nucleotide gated channel, activated by cAMP, conducts K+ and other monovalent cations but excludes Na+, does not contain the GYG amino acid sequence found in other channels with this conductivity profile. Conducts Ca2+ into cells which is linked to the generation of NO …
XLOC_009130	XLOC_009130	AT2G22990	Chr2:9786315-9790179	WT	18	OK	1.42107	0.665577	-1.0943	-1.4379	0.006	0.0341891	AT2G22990.3	sinapoylglucose:malate sinapoyltransferase. Catalyzes the formation of sinapoylmalate from sinapoylglucose. Mutants accumulate excess sinapoylglucose.
XLOC_023939	XLOC_023939	AT4G36120	Chr4:17093087-17097241	WT	18	OK	7.18821	3.36066	-1.09689	-3.13357	5e-05	0.000622834	AT4G36120.1	Plant protein of unknown function (DUF869); CONTAINS InterPro DOMAIN/s: Protein of unknown function DUF869, plant (InterPro:IPR008587); BEST Arabidopsis thaliana protein match is: Plant protein of unknown function (DUF869) (TAIR:AT1G19835.2); Has 41895 Blast hits to 24172 proteins in 1641 species: Archae - 536; Bacteria - 4817; Metazoa - 21606; Fungi - 3730; Plants - 2607; Viruses - 113; Other Eu…
XLOC_012348	XLOC_012348	AT2G34490	Chr2:14535644-14537432	WT	18	OK	5.51949	2.57984	-1.09725	-3.06464	5e-05	0.000622834	AT2G34490.1	Encodes a protein with C22-sterol desaturase activity. The enzyme was shown to catalyze the conversion of both 24-<i>epi</i>-campesterol and &beta;-sitosterol to brassicasterol and stigmasterol, respectively, in the presence of NADPH.
XLOC_021671	XLOC_021671	AT4G38620	Chr4:18053550-18054999	WT	18	OK	25.289	11.806	-1.09899	-3.80712	5e-05	0.000622834	AT4G38620.1	Encodes a R2R3 MYB protein which is involved in the response to UV-B. It functions as a repressor of target gene expression. One of its target genes encodes cinnamate 4-hydroxylase; mutants accumulate sinapate esters in their leaves. MYB4 binds to its own promoter and represses its own expression. Nuclear localization of MYB4 depends on the action of the beta importin SAD2.
XLOC_012442	XLOC_012442	AT2G36100	Chr2:15158560-15160750	WT	18	OK	49.2874	22.9978	-1.09972	-3.60539	5e-05	0.000622834	AT2G36100.1	Uncharacterised protein family (UPF0497); CONTAINS InterPro DOMAIN/s: Uncharacterised protein family UPF0497, trans-membrane plant (InterPro:IPR006702), Uncharacterised protein family UPF0497, trans-membrane plant subgroup (InterPro:IPR006459); BEST Arabidopsis thaliana protein match is: Uncharacterised protein family (UPF0497) (TAIR:AT3G11550.1); Has 599 Blast hits to 599 proteins in 21 species:…
XLOC_015937	XLOC_015937	AT3G59220	Chr3:21894133-21895623	WT	18	OK	10.7586	5.01726	-1.10052	-3.08892	5e-05	0.000622834	AT3G59220.1	encodes a cupin-domain containing protein that is similar to pirins which interact with a CCAAT box binding transcription factor. The protein interacts with GPA1 (G protein alpha-subunit) in vitro. Mutants in the gene are affected in germination and early seedling development.
XLOC_016154	XLOC_016154	AT3G63440	Chr3:23422652-23426536	WT	18	OK	3.15542	1.47109	-1.10094	-1.80999	0.0086	0.0448915	AT3G63440.1	This gene used to be called AtCKX7. It encodes a protein whose sequence is similar to cytokinin oxidase/dehydrogenase, which catalyzes the degradation of cytokinins.
XLOC_001667	XLOC_001667	AT1G32990	Chr1:11955784-11957284	WT	18	OK	8.32622	3.88001	-1.1016	-2.83457	0.0004	0.00385261	AT1G32990.1	mutant has Decreased effective quantum yield of photosystem II; Pale green plants; Reduced growth rate; Plastid Ribosomal Protein L11
XLOC_003862	XLOC_003862	AT1G78070	Chr1:29355021-29358993	WT	18	OK	57.0614	26.5767	-1.10235	-3.55599	5e-05	0.000622834	AT1G78070.1	Transducin/WD40 repeat-like superfamily protein; CONTAINS InterPro DOMAIN/s: WD40 repeat 2 (InterPro:IPR019782), WD40 repeat-like-containing domain (InterPro:IPR011046), WD40 repeat, conserved site (InterPro:IPR019775), WD40-repeat-containing domain (InterPro:IPR017986), WD40/YVTN repeat-like-containing domain (InterPro:IPR015943), WD40 repeat (InterPro:IPR001680), WD40 repeat, subgroup (InterPro…
XLOC_030664	XLOC_030664	AT5G57560	Chr5:23307129-23308282	WT	18	OK	1274	593.096	-1.10303	-2.84836	0.0002	0.00212981	AT5G57560.1	Encodes a cell wall-modifying enzyme, rapidly upregulated in response to environmental stimuli
XLOC_007622	XLOC_007622	AT1G76310	Chr1:28628045-28630394	WT	18	OK	7.64004	3.55188	-1.10499	-3.0146	5e-05	0.000622834	AT1G76310.1	core cell cycle genes
XLOC_011901	XLOC_011901	AT2G26380	Chr2:11226614-11228057	WT	18	OK	10.9557	5.09187	-1.10542	-3.34646	5e-05	0.000622834	AT2G26380.1	Leucine-rich repeat (LRR) family protein; INVOLVED IN: signal transduction, defense response; LOCATED IN: endomembrane system; EXPRESSED IN: hypocotyl, root; CONTAINS InterPro DOMAIN/s: Leucine-rich repeat-containing N-terminal domain, type 2 (InterPro:IPR013210), Leucine-rich repeat (InterPro:IPR001611); BEST Arabidopsis thaliana protein match is: Leucine-rich repeat (LRR) family protein (TAIR:A…
XLOC_010787	XLOC_010787	AT2G05920	Chr2:2269514-2272357	WT	18	OK	121.665	56.5193	-1.1061	-3.82417	5e-05	0.000622834	AT2G05920.1	Subtilase family protein; FUNCTIONS IN: identical protein binding, serine-type endopeptidase activity; INVOLVED IN: proteolysis, negative regulation of catalytic activity; LOCATED IN: cell wall, plant-type cell wall; EXPRESSED IN: 22 plant structures; EXPRESSED DURING: 13 growth stages; CONTAINS InterPro DOMAIN/s: Protease-associated PA (InterPro:IPR003137), Proteinase inhibitor, propeptide (Inte…
XLOC_004791	XLOC_004791	AT1G15730	Chr1:5406024-5410124	WT	18	OK	8.40929	3.89998	-1.10852	-2.19603	0.00025	0.00258687	AT1G15730.1	Cobalamin biosynthesis CobW-like protein; CONTAINS InterPro DOMAIN/s: Cobalamin (vitamin B12) biosynthesis CobW-like (InterPro:IPR003495), Cobalamin (vitamin B12) biosynthesis CobW-like, C-terminal (InterPro:IPR011629); BEST Arabidopsis thaliana protein match is: plastid transcriptionally active 17 (TAIR:AT1G80480.1); Has 16369 Blast hits to 11834 proteins in 1861 species: Archae - 128; Bacteria …
XLOC_017483	XLOC_017483	AT3G25660	Chr3:9339422-9342204	WT	18	OK	7.51711	3.47974	-1.1112	-3.34617	5e-05	0.000622834	AT3G25660.1	Amidase family protein; FUNCTIONS IN: glutaminyl-tRNA synthase (glutamine-hydrolyzing) activity, carbon-nitrogen ligase activity, with glutamine as amido-N-donor; INVOLVED IN: translation; LOCATED IN: chloroplast, chloroplast stroma; EXPRESSED IN: 23 plant structures; EXPRESSED DURING: 14 growth stages; CONTAINS InterPro DOMAIN/s: Amidase, conserved site (InterPro:IPR020556), Amidase (InterPro:IP…
XLOC_004025	XLOC_004025	AT1G01470	Chr1:172145-172948	WT	18	OK	292.874	135.551	-1.11144	-4.9248	5e-05	0.000622834	AT1G01470.1	Encodes late-embryogenesis abundant protein whose mRNA levels are induced in response to wounding and light stress. Might be involved in protection against dessication.
XLOC_000939	XLOC_000939	AT1G19180	Chr1:6621640-6623620	WT	18	OK	649.849	300.67	-1.11193	-3.05461	5e-05	0.000622834	AT1G19180.1	JAZ1 is a nuclear-localized protein involved in jasmonate signaling. JAZ1 transcript levels rise in response to a jasmonate stimulus. JAZ1 can interact with the COI1 F-box subunit of an SCF E3 ubiquitin ligase in a yeast-two-hybrid assay only in the presence of jasmonate-isoleucine (JA-ILE) or coronatine. Application of jasmonate methyl ester to Arabidopsis roots reduces the levels of a JAZ1:GUS …
XLOC_028277	XLOC_028277	AT5G13181,AT5G13190	Chr5:4198845-4216909	WT	18	OK	157.793	72.9573	-1.11291	-2.2398	0.0028	0.0186585	AT5G13181.1	This gene encodes a small protein and has either evidence of transcription or purifying selection.
XLOC_009138	XLOC_009138	AT2G23120	Chr2:9842042-9842634	WT	18	OK	269.031	124.298	-1.11397	-5.44558	5e-05	0.000622834	AT2G23120.1	Late embryogenesis abundant protein, group 6; FUNCTIONS IN: molecular_function unknown; INVOLVED IN: biological_process unknown; LOCATED IN: plasma membrane; EXPRESSED IN: 23 plant structures; EXPRESSED DURING: 14 growth stages; CONTAINS InterPro DOMAIN/s: Late embryogenesis abundant protein, group 6 (InterPro:IPR018930); BEST Arabidopsis thaliana protein match is: Late embryogenesis abundant pro…
XLOC_024877	XLOC_024877	AT5G15760	Chr5:5143052-5144053	WT	18	OK	3.65595	1.68782	-1.11509	-2.13639	0.00755	0.0408198	AT5G15760.1	Ribosomal protein PSRP-3/Ycf65; FUNCTIONS IN: structural constituent of ribosome; INVOLVED IN: translation; LOCATED IN: ribosome, intracellular, chloroplast, plastid; EXPRESSED IN: 18 plant structures; EXPRESSED DURING: 11 growth stages; CONTAINS InterPro DOMAIN/s: Ribosomal protein PSRP-3/Ycf65 (InterPro:IPR006924); BEST Arabidopsis thaliana protein match is: Ribosomal protein PSRP-3/Ycf65 (TAIR…
XLOC_016089	XLOC_016089	AT3G61930	Chr3:22935509-22936181	WT	18	OK	11.9554	5.51456	-1.11634	-3.093	0.0003	0.0030153	AT3G61930.1	unknown protein; FUNCTIONS IN: molecular_function unknown; INVOLVED IN: N-terminal protein myristoylation; EXPRESSED IN: 11 plant structures; EXPRESSED DURING: 4 anthesis, C globular stage, petal differentiation and expansion stage; Has 11 Blast hits to 11 proteins in 5 species: Archae - 0; Bacteria - 0; Metazoa - 0; Fungi - 0; Plants - 11; Viruses - 0; Other Eukaryotes - 0 (source: NCBI BLink).
XLOC_014575	XLOC_014575	AT3G28880	Chr3:10892413-10898841	WT	18	OK	2.68182	1.2363	-1.11718	-2.54523	0.00015	0.00165462	AT3G28880.1	Ankyrin repeat family protein; CONTAINS InterPro DOMAIN/s: Ankyrin repeat-containing domain (InterPro:IPR020683), Ankyrin repeat (InterPro:IPR002110); BEST Arabidopsis thaliana protein match is: Ankyrin repeat family protein (TAIR:AT2G03430.1); Has 30201 Blast hits to 17322 proteins in 780 species: Archae - 12; Bacteria - 1396; Metazoa - 17338; Fungi - 3422; Plants - 5037; Viruses - 0; Other Euka…
XLOC_016620	XLOC_016620	AT3G09540	Chr3:2928810-2931228	WT	18	OK	6.22794	2.86888	-1.11827	-2.95693	0.0001	0.00115693	AT3G09540.1	Pectin lyase-like superfamily protein; FUNCTIONS IN: lyase activity, pectate lyase activity; INVOLVED IN: N-terminal protein myristoylation; EXPRESSED IN: 22 plant structures; EXPRESSED DURING: 12 growth stages; CONTAINS InterPro DOMAIN/s: Pectin lyase fold/virulence factor (InterPro:IPR011050), AmbAllergen (InterPro:IPR018082), Pectate lyase/Amb allergen (InterPro:IPR002022), Pectin lyase fold (…
XLOC_026996	XLOC_026996	AT5G54400	Chr5:22090532-22092126	WT	18	OK	26.8608	12.358	-1.12006	-4.06963	5e-05	0.000622834	AT5G54400.1	S-adenosyl-L-methionine-dependent methyltransferases superfamily protein; FUNCTIONS IN: methyltransferase activity; INVOLVED IN: metabolic process; LOCATED IN: plasma membrane; EXPRESSED IN: 18 plant structures; EXPRESSED DURING: 6 growth stages; CONTAINS InterPro DOMAIN/s: Methyltransferase type 11 (InterPro:IPR013216); BEST Arabidopsis thaliana protein match is: S-adenosyl-L-methionine-dependen…
XLOC_007534	XLOC_007534	AT1G74500	Chr1:27998174-27998821	WT	18	OK	7.83125	3.60001	-1.12124	-2.69991	0.0027	0.0181438	AT1G74500.1	Encodes a basic helix?loop?helix transcription factor that acts downstream of MP in root initiation. TMO7 protein moves to the hypophysis and to vascular cells, contributing to MP-dependent root formation. Promotes the correct definition of the hypophysis cell division plane.
XLOC_024657	XLOC_024657	AT5G10750	Chr5:3398950-3400156	WT	18	OK	41.1782	18.886	-1.12457	-4.44027	5e-05	0.000622834	AT5G10750.1	Protein of unknown function (DUF1336); CONTAINS InterPro DOMAIN/s: Protein of unknown function DUF1336 (InterPro:IPR009769); BEST Arabidopsis thaliana protein match is: Protein of unknown function (DUF1336) (TAIR:AT5G24990.1); Has 1807 Blast hits to 1807 proteins in 277 species: Archae - 0; Bacteria - 0; Metazoa - 736; Fungi - 347; Plants - 385; Viruses - 0; Other Eukaryotes - 339 (source: NCBI B…
XLOC_002602	XLOC_002602	AT1G53840	Chr1:20101444-20103667	WT	18	OK	114.502	52.4968	-1.12507	-4.16643	5e-05	0.000622834	AT1G53840.1	encodes a pectin methylesterase
XLOC_027519	XLOC_027519	AT5G64530	Chr5:25795232-25797149	WT	18	OK	13.9036	6.37062	-1.12595	-2.86853	5e-05	0.000622834	AT5G64530.1	xylem NAC domain 1 (XND1); CONTAINS InterPro DOMAIN/s: No apical meristem (NAM) protein (InterPro:IPR003441); BEST Arabidopsis thaliana protein match is: NAC domain containing protein 25 (TAIR:AT1G61110.1); Has 2741 Blast hits to 2738 proteins in 73 species: Archae - 0; Bacteria - 0; Metazoa - 0; Fungi - 0; Plants - 2741; Viruses - 0; Other Eukaryotes - 0 (source: NCBI BLink).
XLOC_015522	XLOC_015522	AT3G50970	Chr3:18940776-18941554	WT	18	OK	505.826	231.611	-1.12693	-4.6371	5e-05	0.000622834	AT3G50970.1	Belongs to the dehydrin protein family, which contains highly conserved stretches of 7-17 residues that are repetitively scattered in their sequences, the K-, S-, Y- and lysine rich segments. LTI29 and LTI30 double overexpressors confer freeze tolerance. Located in membranes. mRNA upregulated by water deprivation and abscisic acid.
XLOC_008835	XLOC_008835	AT2G17845	Chr2:7758845-7759881	WT	18	OK	64.6702	29.5453	-1.13017	-4.72023	5e-05	0.000622834	AT2G17845.1	NAD(P)-binding Rossmann-fold superfamily protein; FUNCTIONS IN: oxidoreductase activity, binding, catalytic activity; INVOLVED IN: oxidation reduction, metabolic process; EXPRESSED IN: sepal, male gametophyte, carpel; EXPRESSED DURING: 4 anthesis, petal differentiation and expansion stage; CONTAINS InterPro DOMAIN/s: Short-chain dehydrogenase/reductase, conserved site (InterPro:IPR020904), NAD(P)…
XLOC_003556	XLOC_003556	AT1G71930	Chr1:27076139-27077957	WT	18	OK	1.76065	0.803625	-1.13151	-1.84705	0.0096	0.0489318	AT1G71930.1	Encodes a NAC-domain transcription factor with transcriptional activation activity that is involved in xylem formation. Induces transdifferentiation of various cells into protoxylem vessel elements. Located in the nucleus. Expression induced in the presence of auxin, cytokinin and brassinosteroids.
XLOC_006656	XLOC_006656	AT1G56720	Chr1:21263419-21266368	WT	18	OK	10.0241	4.56854	-1.13366	-3.2128	5e-05	0.000622834	AT1G56720.1	Protein kinase superfamily protein; FUNCTIONS IN: protein serine/threonine kinase activity, protein kinase activity, kinase activity, ATP binding; INVOLVED IN: protein amino acid phosphorylation; LOCATED IN: cellular_component unknown; EXPRESSED IN: 23 plant structures; EXPRESSED DURING: 13 growth stages; CONTAINS InterPro DOMAIN/s: Protein kinase, ATP binding site (InterPro:IPR017441), Protein k…
XLOC_002348	XLOC_002348	AT1G49200	Chr1:18198226-18199168	WT	18	OK	3.05861	1.39384	-1.13381	-2.17006	0.00515	0.0303107	AT1G49200.1	RING/U-box superfamily protein; FUNCTIONS IN: zinc ion binding; EXPRESSED IN: 18 plant structures; EXPRESSED DURING: 10 growth stages; CONTAINS InterPro DOMAIN/s: Zinc finger, RING-type (InterPro:IPR001841), Zinc finger, C3HC4 RING-type (InterPro:IPR018957); BEST Arabidopsis thaliana protein match is: RING/U-box superfamily protein (TAIR:AT1G49220.1); Has 8744 Blast hits to 8720 proteins in 274 s…
XLOC_001476	XLOC_001476	AT1G29660	Chr1:10371838-10373766	WT	18	OK	2.00153	0.910669	-1.1361	-1.99404	0.00585	0.0334757	AT1G29660.1	GDSL-like Lipase/Acylhydrolase superfamily protein; FUNCTIONS IN: hydrolase activity, acting on ester bonds, carboxylesterase activity; INVOLVED IN: lipid metabolic process; LOCATED IN: apoplast, nucleus; EXPRESSED IN: 19 plant structures; EXPRESSED DURING: 10 growth stages; CONTAINS InterPro DOMAIN/s: Lipase, GDSL (InterPro:IPR001087); BEST Arabidopsis thaliana protein match is: GDSL-like Lipase…
XLOC_027254	XLOC_027254	AT5G59320	Chr5:23928970-23929745	WT	18	OK	24.8892	11.3167	-1.13707	-3.98486	5e-05	0.000622834	AT5G59320.1	Predicted to encode a PR (pathogenesis-related) protein. Belongs to the lipid transfer protein (PR-14) family with the following members: At2g38540/LTP1, At2g38530/LTP2, At5g59320/LTP3, At5g59310/LTP4, At3g51600/LTP5, At3g08770/LTP6, At2g15050/LTP7, At2g18370/LTP8, At2g15325/LTP9, At5g01870/LTP10, At4g33355/LTP11, At3g51590/LTP12, At5g44265/LTP13, At5g62065/LTP14, At4g08530/LTP15.
XLOC_023051	XLOC_023051	AT4G19120	Chr4:10460294-10464174	WT	18	OK	58.2487	26.4826	-1.13718	-3.9646	5e-05	0.000622834	AT4G19120.1	early-responsive to dehydration 3 (ERD3); CONTAINS InterPro DOMAIN/s: Protein of unknown function DUF248, methyltransferase putative (InterPro:IPR004159); BEST Arabidopsis thaliana protein match is: S-adenosyl-L-methionine-dependent methyltransferases superfamily protein (TAIR:AT1G31850.2); Has 30201 Blast hits to 17322 proteins in 780 species: Archae - 12; Bacteria - 1396; Metazoa - 17338; Fungi…
XLOC_027093	XLOC_027093	AT5G56120	Chr5:22721372-22725095	WT	18	OK	10.2338	4.65006	-1.13802	-2.43481	0.0018	0.0131378	AT5G56120.1	unknown protein; BEST Arabidopsis thaliana protein match is: unknown protein (TAIR:AT3G12870.1); Has 77 Blast hits to 75 proteins in 12 species: Archae - 0; Bacteria - 0; Metazoa - 0; Fungi - 0; Plants - 77; Viruses - 0; Other Eukaryotes - 0 (source: NCBI BLink).
XLOC_024131	XLOC_024131	AT4G39770	Chr4:18448979-18451293	WT	18	OK	8.06722	3.66478	-1.13835	-3.11493	5e-05	0.000622834	AT4G39770.1	Haloacid dehalogenase-like hydrolase (HAD) superfamily protein; FUNCTIONS IN: catalytic activity, trehalose-phosphatase activity; INVOLVED IN: trehalose biosynthetic process, metabolic process; LOCATED IN: cellular_component unknown; EXPRESSED IN: 10 plant structures; EXPRESSED DURING: 8 growth stages; CONTAINS InterPro DOMAIN/s: HAD-superfamily hydrolase, subfamily IIB (InterPro:IPR006379), Treh…
XLOC_005134	XLOC_005134	AT1G22570	Chr1:7976619-7978573	WT	18	OK	9.2567	4.20266	-1.1392	-3.49388	5e-05	0.000622834	AT1G22570.1	Major facilitator superfamily protein; FUNCTIONS IN: transporter activity; INVOLVED IN: oligopeptide transport; LOCATED IN: membrane; EXPRESSED IN: 17 plant structures; EXPRESSED DURING: 10 growth stages; CONTAINS InterPro DOMAIN/s: PTR2 family proton/oligopeptide symporter, conserved site (InterPro:IPR018456), Oligopeptide transporter (InterPro:IPR000109), Major facilitator superfamily, general …
XLOC_023241	XLOC_023241	AT4G22610	Chr4:11902104-11902642	WT	18	OK	42.7516	19.3919	-1.14052	-4.59412	5e-05	0.000622834	AT4G22610.1	Bifunctional inhibitor/lipid-transfer protein/seed storage 2S albumin superfamily protein; FUNCTIONS IN: lipid binding; INVOLVED IN: lipid transport; LOCATED IN: endomembrane system; EXPRESSED IN: hypocotyl, root; CONTAINS InterPro DOMAIN/s: Bifunctional inhibitor/plant lipid transfer protein/seed storage (InterPro:IPR016140), Plant lipid transfer protein/seed storage/trypsin-alpha amylase inhibi…
XLOC_000419	XLOC_000419	AT1G09560	Chr1:3093470-3094864	WT	18	OK	998.508	452.908	-1.14056	-3.54112	5e-05	0.000622834	AT1G09560.1	germin-like protein (GLP5)
XLOC_013223	XLOC_013223	AT3G03780	Chr3:957084-960980	WT	18	OK	171.033	77.5077	-1.14186	-3.76318	5e-05	0.000622834	AT3G03780.1	Encodes a cytosolic methionine synthase, involved in methionine regeneration via the activated methyl cycle (or SAM cycle)
XLOC_016807	XLOC_016807	AT3G12830	Chr3:4078650-4079608	WT	18	OK	36.0472	16.3162	-1.14358	-4.71787	5e-05	0.000622834	AT3G12830.1	SAUR-like auxin-responsive protein family ; CONTAINS InterPro DOMAIN/s: Auxin responsive SAUR protein (InterPro:IPR003676); BEST Arabidopsis thaliana protein match is: SAUR-like auxin-responsive protein family (TAIR:AT1G56150.1); Has 1206 Blast hits to 1201 proteins in 26 species: Archae - 0; Bacteria - 0; Metazoa - 0; Fungi - 0; Plants - 1205; Viruses - 0; Other Eukaryotes - 1 (source: NCBI BLin…
XLOC_016730	XLOC_016730	AT3G11520	Chr3:3625323-3627273	WT	18	OK	7.09082	3.20874	-1.14395	-3.12976	5e-05	0.000622834	AT3G11520.1	Encodes a B-type mitotic cyclin.
XLOC_015935	XLOC_015935	AT3G59200	Chr3:21887171-21889344	WT	18	OK	1.48074	0.669897	-1.1443	-2.00332	0.0037	0.0233433	AT3G59200.1	F-box/RNI-like superfamily protein; CONTAINS InterPro DOMAIN/s: F-box domain, cyclin-like (InterPro:IPR001810), F-box domain, Skp2-like (InterPro:IPR022364), FBD-like (InterPro:IPR006566), Leucine-rich repeat 2 (InterPro:IPR013101); BEST Arabidopsis thaliana protein match is: F-box/RNI-like superfamily protein (TAIR:AT4G14096.1); Has 2158 Blast hits to 2093 proteins in 26 species: Archae - 0; Bac…
XLOC_023906	XLOC_023906	AT4G35320	Chr4:16805868-16806655	WT	18	OK	25.8614	11.7	-1.1443	-4.13567	5e-05	0.000622834	AT4G35320.1	unknown protein; BEST Arabidopsis thaliana protein match is: unknown protein (TAIR:AT2G17300.1); Has 30201 Blast hits to 17322 proteins in 780 species: Archae - 12; Bacteria - 1396; Metazoa - 17338; Fungi - 3422; Plants - 5037; Viruses - 0; Other Eukaryotes - 2996 (source: NCBI BLink).
XLOC_023030	XLOC_023030	AT4G18780	Chr4:10311029-10316790	WT	18	OK	24.0943	10.8938	-1.14518	-4.12533	5e-05	0.000622834	AT4G18780.1	Encodes a member of the cellulose synthase family involved in secondary cell wall biosynthesis. Mutants have abnormal xylem formation, reduced cellulose content, and enhanced drought and osmotic stress tolerance. Mediates resistance towards bacterial pathogens via ABA. Confers resistance towards bacterial and fungal pathogens, independent of salicylic acid, ethylene and jasmonate signaling.
XLOC_012651	XLOC_012651	AT2G39800	Chr2:16596986-16603319	WT	18	OK	17.3574	7.84394	-1.1459	-3.03653	5e-05	0.000622834	AT2G39800.1	encodes a delta1-pyrroline-5-carboxylate synthase that catalyzes the rate-limiting enzyme in the biosynthesis of proline. Gene is expressed in reproductive organs and tissues under non-stress conditions but in the whole plant under water-limiting condition. Expression is also induced by abscisic acid and salt stress in a light-dependent manner. encodes a delta1-pyrroline-5-carboxylate synthase th…
XLOC_023877	XLOC_023877	AT4G34760	Chr4:16582182-16582879	WT	18	OK	23.2625	10.5069	-1.14668	-3.87412	5e-05	0.000622834	AT4G34760.1	SAUR-like auxin-responsive protein family ; CONTAINS InterPro DOMAIN/s: Auxin responsive SAUR protein (InterPro:IPR003676); BEST Arabidopsis thaliana protein match is: SAUR-like auxin-responsive protein family (TAIR:AT2G16580.1); Has 1475 Blast hits to 1458 proteins in 28 species: Archae - 0; Bacteria - 0; Metazoa - 0; Fungi - 0; Plants - 1474; Viruses - 0; Other Eukaryotes - 1 (source: NCBI BLin…
XLOC_005339	XLOC_005339	AT1G27100	Chr1:9407124-9411439	WT	18	OK	124.167	56.059	-1.14726	-3.71628	5e-05	0.000622834	AT1G27100.1	Actin cross-linking protein; FUNCTIONS IN: molecular_function unknown; INVOLVED IN: biological_process unknown; LOCATED IN: vacuole; EXPRESSED IN: 23 plant structures; EXPRESSED DURING: 13 growth stages; CONTAINS InterPro DOMAIN/s: Protein of unknown function DUF569 (InterPro:IPR007679), Actin cross-linking (InterPro:IPR008999); BEST Arabidopsis thaliana protein match is: Protein of unknown funct…
XLOC_003074	XLOC_003074	AT1G62975	Chr1:23328646-23330776	WT	18	OK	30.2356	13.649	-1.14745	-3.51869	5e-05	0.000622834	AT1G62975.1	basic helix-loop-helix (bHLH) DNA-binding superfamily protein; FUNCTIONS IN: DNA binding, sequence-specific DNA binding transcription factor activity; INVOLVED IN: regulation of transcription; LOCATED IN: nucleus; CONTAINS InterPro DOMAIN/s: Helix-loop-helix DNA-binding domain (InterPro:IPR001092), Helix-loop-helix DNA-binding (InterPro:IPR011598); BEST Arabidopsis thaliana protein match is: basi…
XLOC_004323	XLOC_004323	AT1G07150	Chr1:2193940-2195798	WT	18	OK	3.91556	1.76465	-1.14984	-2.31509	0.0001	0.00115693	AT1G07150.1	member of MEKK subfamily
XLOC_005141	XLOC_005141	AT1G22710	Chr1:8030640-8033117	WT	18	OK	15.5759	7.0037	-1.15312	-4.10106	5e-05	0.000622834	AT1G22710.1	Encodes for a high-affinity transporter essential for phloem loading and long-distance transport. A major sucrose transporter, AtSUC2 can also transport a wide range of physiological and synthetic glucose conjugates with both &#945;- or &#946;-linkage.
XLOC_007231	XLOC_007231	AT1G68360	Chr1:25621677-25622412	WT	18	OK	39.8754	17.9195	-1.15397	-4.50634	5e-05	0.000622834	AT1G68360.1	C2H2 and C2HC zinc fingers superfamily protein; FUNCTIONS IN: sequence-specific DNA binding transcription factor activity; INVOLVED IN: regulation of transcription; LOCATED IN: intracellular; EXPRESSED IN: 12 plant structures; EXPRESSED DURING: 4 anthesis, F mature embryo stage, petal differentiation and expansion stage, E expanded cotyledon stage, D bilateral stage; CONTAINS InterPro DOMAIN/s: Z…
XLOC_024896	XLOC_024896	AT5G16010	Chr5:5227923-5229116	WT	18	OK	33.7701	15.1633	-1.15516	-4.5269	5e-05	0.000622834	AT5G16010.1	3-oxo-5-alpha-steroid 4-dehydrogenase family protein; FUNCTIONS IN: oxidoreductase activity, acting on the CH-CH group of donors, 3-oxo-5-alpha-steroid 4-dehydrogenase activity; INVOLVED IN: lipid metabolic process; LOCATED IN: chloroplast, chloroplast envelope; EXPRESSED IN: 23 plant structures; EXPRESSED DURING: 15 growth stages; CONTAINS InterPro DOMAIN/s: 3-oxo-5-alpha-steroid 4-dehydrogenase…
XLOC_028135	XLOC_028135	AT5G10330,AT5G10336	Chr5:3247846-3252731	WT	18	OK	17.9582	8.05431	-1.15681	-3.4988	5e-05	0.000622834	AT5G10330.1	Encodes histidinol-phosphate aminotransferase that catalyzes the eighth step in histidine biosynthesis. Loss of function mutations are embryo lethal.
XLOC_027483	XLOC_027483	AT5G63850	Chr5:25551054-25553520	WT	18	OK	46.7547	20.9618	-1.15735	-4.71873	5e-05	0.000622834	AT5G63850.1	Amino acid transporter whose expression is downregulated by dehydration.
XLOC_004112	XLOC_004112	AT1G03300	Chr1:811032-813086	WT	18	OK	3.32726	1.49161	-1.15747	-2.55811	5e-05	0.000622834	AT1G03300.1	Member of the plant-specific DUF724 protein family. Arabidopsis has 10 DUF724 proteins. Loss of function mutant has a WT phenotype
XLOC_017112	XLOC_017112	AT3G18660	Chr3:6419030-6422002	WT	18	OK	4.95826	2.21887	-1.16001	-2.83183	5e-05	0.000622834	AT3G18660.2	Plants expressing an RNAi construct specifically targeting PGSIP1 was shown to have a dramatically reduced amount of starch. Mutants have significantly lower contents of GlcA compared to wild type and show only 50% of GlcA transferase activity compared to wild type.
XLOC_027680	XLOC_027680	AT5G01100	Chr5:34595-37948	WT	18	OK	61.7825	27.6108	-1.16196	-4.26361	5e-05	0.000622834	AT5G01100.1	O-fucosyltransferase family protein; CONTAINS InterPro DOMAIN/s: GDP-fucose protein O-fucosyltransferase (InterPro:IPR019378); BEST Arabidopsis thaliana protein match is: O-fucosyltransferase family protein (TAIR:AT3G54100.1); Has 1807 Blast hits to 1807 proteins in 277 species: Archae - 0; Bacteria - 0; Metazoa - 736; Fungi - 347; Plants - 385; Viruses - 0; Other Eukaryotes - 339 (source: NCBI B…
XLOC_019222	XLOC_019222	AT3G61380	Chr3:22706311-22712018	WT	18	OK	28.5776	12.7579	-1.16349	-3.4315	5e-05	0.000622834	AT3G61380.1	Phosphatidylinositol N-acetyglucosaminlytransferase subunit P-related; FUNCTIONS IN: molecular_function unknown; INVOLVED IN: biological_process unknown; LOCATED IN: plasma membrane; EXPRESSED IN: 23 plant structures; EXPRESSED DURING: 14 growth stages; BEST Arabidopsis thaliana protein match is: Phosphatidylinositol N-acetyglucosaminlytransferase subunit P-related (TAIR:AT2G45900.1); Has 970 Bla…
XLOC_013993	XLOC_013993	AT3G18890	Chr3:6511022-6514994	WT	18	OK	1.86674	0.832115	-1.16567	-2.33223	0.0011	0.00879749	AT3G18890.1	NAD(P)-binding Rossmann-fold superfamily protein; FUNCTIONS IN: binding, catalytic activity; INVOLVED IN: metabolic process; LOCATED IN: chloroplast thylakoid membrane, chloroplast, chloroplast envelope; EXPRESSED IN: 21 plant structures; EXPRESSED DURING: 14 growth stages; CONTAINS InterPro DOMAIN/s: NAD(P)-binding domain (InterPro:IPR016040), NmrA-like (InterPro:IPR008030); BEST Arabidopsis tha…
XLOC_020942	XLOC_020942	AT4G24380	Chr4:12612534-12616418	WT	18	OK	96.1552	42.858	-1.1658	-3.49756	5e-05	0.000622834	AT4G24380.1	INVOLVED IN: 10-formyltetrahydrofolate biosynthetic process, folic acid and derivative biosynthetic process; EXPRESSED IN: 24 plant structures; EXPRESSED DURING: 15 growth stages; CONTAINS InterPro DOMAIN/s: Serine hydrolase (InterPro:IPR005645); BEST Arabidopsis thaliana protein match is: alpha/beta-Hydrolases superfamily protein (TAIR:AT5G65400.1); Has 30201 Blast hits to 17322 proteins in 780 …
XLOC_008136	XLOC_008136	AT2G05440	Chr2:1992990-1995546	WT	18	OK	1567.43	698.34	-1.1664	-2.82043	5e-05	0.000622834	AT2G05440.2	GLYCINE RICH PROTEIN 9 (GRP9); FUNCTIONS IN: molecular_function unknown; INVOLVED IN: biological_process unknown; LOCATED IN: endomembrane system; CONTAINS InterPro DOMAIN/s: Glycine rich protein (InterPro:IPR010800); BEST Arabidopsis thaliana protein match is: Glycine-rich protein family (TAIR:AT2G05510.6); Has 147102 Blast hits to 34686 proteins in 2088 species: Archae - 221; Bacteria - 46389; …
XLOC_011709	XLOC_011709	AT2G23040	Chr2:9807892-9809948	WT	18	OK	9.59893	4.27523	-1.16687	-1.97816	0.0007	0.00608993	AT2G23040.1	unknown protein; Has 8 Blast hits to 8 proteins in 3 species: Archae - 0; Bacteria - 0; Metazoa - 0; Fungi - 0; Plants - 8; Viruses - 0; Other Eukaryotes - 0 (source: NCBI BLink).
XLOC_023431	XLOC_023431	AT4G26370	Chr4:13333723-13336230	WT	18	OK	1.48878	0.662685	-1.16774	-1.63384	0.0085	0.0445551	AT4G26370.1	antitermination NusB domain-containing protein; FUNCTIONS IN: RNA binding; INVOLVED IN: regulation of transcription, DNA-dependent; LOCATED IN: chloroplast; EXPRESSED IN: 20 plant structures; EXPRESSED DURING: 13 growth stages; CONTAINS InterPro DOMAIN/s: NusB/RsmB/TIM44 (InterPro:IPR006027); Has 30201 Blast hits to 17322 proteins in 780 species: Archae - 12; Bacteria - 1396; Metazoa - 17338; Fun…
XLOC_021635	XLOC_021635	AT4G37760	Chr4:17743886-17746678	WT	18	OK	2.21168	0.98434	-1.16792	-2.44135	0.0007	0.00608993	AT4G37760.1	squalene epoxidase 3 (SQE3); FUNCTIONS IN: squalene monooxygenase activity; INVOLVED IN: response to jasmonic acid stimulus, response to wounding, sterol biosynthetic process; LOCATED IN: endomembrane system, integral to membrane; EXPRESSED IN: 23 plant structures; EXPRESSED DURING: 15 growth stages; CONTAINS InterPro DOMAIN/s: Squalene epoxidase (InterPro:IPR013698), Fumarate reductase/succinate…
XLOC_024319	XLOC_024319	AT5G03770	Chr5:995159-998283	WT	18	OK	6.1001	2.71077	-1.17013	-2.85133	5e-05	0.000622834	AT5G03770.1	Encodes a putative KDO (3-deoxy-D-manno-octulosonate) transferase
XLOC_027623	XLOC_027623	AT5G66570	Chr5:26568652-26570278	WT	18	OK	5.56956	2.47459	-1.17037	-2.6506	0.0004	0.00385261	AT5G66570.1	Encodes a protein which is an extrinsic subunit of photosystem II and which has been proposed to play a central role in stabilization of the catalytic manganese cluster. In <i>Arabidopsis thaliana</i> the PsbO proteins are encoded by two genes: <i>psbO1</i> and <i>psbO2</i>. PsbO1 is the major isoform in the wild-type.
XLOC_007645	XLOC_007645	AT1G76790	Chr1:28814447-28823673	WT	18	OK	115.825	51.4437	-1.17088	-3.02551	5e-05	0.000622834	AT1G76790.1	O-methyltransferase family protein; FUNCTIONS IN: methyltransferase activity, O-methyltransferase activity, protein dimerization activity; LOCATED IN: cytosol; EXPRESSED IN: 19 plant structures; EXPRESSED DURING: 13 growth stages; CONTAINS InterPro DOMAIN/s: Winged helix-turn-helix transcription repressor DNA-binding (InterPro:IPR011991), Plant methyltransferase dimerisation (InterPro:IPR012967),…
XLOC_029846	XLOC_029846	AT5G42650	Chr5:17097594-17099395	WT	18	OK	39.4447	17.5158	-1.17117	-4.51936	5e-05	0.000622834	AT5G42650.1	Encodes a member of the cytochrome p450 CYP74 gene family that functions as an allene oxide synthase. This enzyme catalyzes dehydration of the hydroperoxide to an unstable allene oxide in the JA biosynthetic pathway. It shows a dual catalytic activity, the major one being a 13-AOS but also expressing a 9-AOS activity.
XLOC_004591	XLOC_004591	AT1G11960	Chr1:4039601-4044000	WT	18	OK	57.3168	25.4497	-1.17131	-4.0903	5e-05	0.000622834	AT1G11960.1	ERD (early-responsive to dehydration stress) family protein; FUNCTIONS IN: molecular_function unknown; INVOLVED IN: biological_process unknown; LOCATED IN: plasma membrane; EXPRESSED IN: 22 plant structures; EXPRESSED DURING: 13 growth stages; CONTAINS InterPro DOMAIN/s: Protein of unknown function DUF221 (InterPro:IPR003864); BEST Arabidopsis thaliana protein match is: ERD (early-responsive to d…
XLOC_021511	XLOC_021511	AT4G35350	Chr4:16810481-16812009	WT	18	OK	102.045	45.3012	-1.17158	-4.01638	5e-05	0.000622834	AT4G35350.1	tracheary element vacuolar protein
XLOC_003703	XLOC_003703	AT1G75000	Chr1:28163649-28164586	WT	18	OK	3.54863	1.57464	-1.17224	-2.64216	0.0056	0.0323833	AT1G75000.1	GNS1/SUR4 membrane protein family; FUNCTIONS IN: molecular_function unknown; INVOLVED IN: biological_process unknown; LOCATED IN: integral to membrane; CONTAINS InterPro DOMAIN/s: GNS1/SUR4 membrane protein (InterPro:IPR002076); BEST Arabidopsis thaliana protein match is: GNS1/SUR4 membrane protein family (TAIR:AT4G36830.1); Has 217 Blast hits to 217 proteins in 67 species: Archae - 0; Bacteria -…
XLOC_015237	XLOC_015237	AT3G45680	Chr3:16770932-16773030	WT	18	OK	4.18812	1.85669	-1.17357	-2.93649	0.0002	0.00212981	AT3G45680.1	Major facilitator superfamily protein; FUNCTIONS IN: transporter activity; INVOLVED IN: oligopeptide transport, response to nematode; LOCATED IN: membrane; EXPRESSED IN: 12 plant structures; EXPRESSED DURING: 4 anthesis, C globular stage, petal differentiation and expansion stage; CONTAINS InterPro DOMAIN/s: PTR2 family proton/oligopeptide symporter, conserved site (InterPro:IPR018456), Oligopept…
XLOC_023640	XLOC_023640	AT4G30280	Chr4:14825807-14827047	WT	18	OK	312.485	138.43	-1.17463	-4.35179	5e-05	0.000622834	AT4G30280.1	Encodes a xyloglucan endotransglucosylase/hydrolase with only only the endotransglucosylase (XET; EC 2.4.1.207) activity towards xyloglucan and non-detectable endohydrolytic (XEH; EC 3.2.1.151) activity. Expressed in the mature or basal regions of both the main and lateral roots, but not in the tip of these roots where cell division occurs.
XLOC_026637	XLOC_026637	AT5G48010	Chr5:19456959-19461693	WT	18	OK	4.74265	2.09769	-1.17689	-2.88737	5e-05	0.000622834	AT5G48010.2	Encodes an oxidosqualene cyclase involved in the biosynthesis of thalianol, a tricyclic triterpenoid of unknown function. Overexpression of THAS leads to dwarfing in the aerial tissues of Arabidopsis plants, but increases their root length. THAS is part of a small operon-like cluster of genes (with At5g48000 (THAH) and At5g47990 (THAD)) involved in thalianol metabolism.
XLOC_026718	XLOC_026718	AT5G49520	Chr5:20090666-20093369	WT	18	OK	269.931	119.268	-1.17838	-3.71804	5e-05	0.000622834	AT5G49520.1	Encodes WRKY48, a member of the WRKY Transcription Factor. WRKY48 is a stress- and pathogen-induced transcriptional activator that represses plant basal defense.
XLOC_012946	XLOC_012946	AT2G45400	Chr2:18703828-18706266	WT	18	OK	22.6637	10.0113	-1.17876	-4.09679	5e-05	0.000622834	AT2G45400.1	involved in the regulation of brassinosteroid metabolic pathway
XLOC_015396	XLOC_015396	AT3G48460	Chr3:17949444-17951195	WT	18	OK	2.08648	0.918095	-1.18435	-2.10252	0.00305	0.0199753	AT3G48460.1	GDSL-like Lipase/Acylhydrolase superfamily protein; FUNCTIONS IN: hydrolase activity, acting on ester bonds, carboxylesterase activity; INVOLVED IN: glycerol biosynthetic process, lipid metabolic process; LOCATED IN: endomembrane system; EXPRESSED IN: 22 plant structures; EXPRESSED DURING: 14 growth stages; CONTAINS InterPro DOMAIN/s: Lipase, GDSL (InterPro:IPR001087); BEST Arabidopsis thaliana p…
XLOC_015256	XLOC_015256	AT3G45970	Chr3:16896165-16898013	WT	18	OK	472.686	207.942	-1.1847	-3.38548	5e-05	0.000622834	AT3G45970.1	member of EXPANSIN-LIKE. Naming convention from the Expansin Working Group (Kende et al, 2004. Plant Mol Bio)
XLOC_015789	XLOC_015789	AT3G55980	Chr3:20776294-20778842	WT	18	OK	451.344	198.351	-1.18617	-3.17709	5e-05	0.000622834	AT3G55980.1	salt-inducible zinc finger 1 (SZF1); CONTAINS InterPro DOMAIN/s: Zinc finger, CCCH-type (InterPro:IPR000571), Ankyrin repeat-containing domain (InterPro:IPR020683), Ankyrin repeat (InterPro:IPR002110); BEST Arabidopsis thaliana protein match is: zinc finger (CCCH-type) family protein (TAIR:AT2G40140.2); Has 1623 Blast hits to 1414 proteins in 181 species: Archae - 2; Bacteria - 49; Metazoa - 777;…
XLOC_012418	XLOC_012418	AT2G35710	Chr2:15010795-15014284	WT	18	OK	84.6185	37.1492	-1.18764	-4.13659	5e-05	0.000622834	AT2G35710.1	Nucleotide-diphospho-sugar transferases superfamily protein; FUNCTIONS IN: transferase activity, transferring hexosyl groups, transferase activity, transferring glycosyl groups; INVOLVED IN: carbohydrate biosynthetic process, biosynthetic process; LOCATED IN: endomembrane system; EXPRESSED IN: 11 plant structures; EXPRESSED DURING: 7 growth stages; CONTAINS InterPro DOMAIN/s: Glycosyl transferase…
XLOC_007686	XLOC_007686	AT1G77525	Chr1:29133953-29134531	WT	18	OK	16.8763	7.4081	-1.18782	-3.73401	0.00055	0.00498267	AT1G77525.1	unknown protein; FUNCTIONS IN: molecular_function unknown; INVOLVED IN: biological_process unknown; LOCATED IN: endomembrane system; Has 30201 Blast hits to 17322 proteins in 780 species: Archae - 12; Bacteria - 1396; Metazoa - 17338; Fungi - 3422; Plants - 5037; Viruses - 0; Other Eukaryotes - 2996 (source: NCBI BLink).
XLOC_007579	XLOC_007579	AT1G75520	Chr1:28351561-28353495	WT	18	OK	6.3877	2.80351	-1.18806	-3.1672	5e-05	0.000622834	AT1G75520.1	A member of SHI gene family. Arabidopsis thaliana has ten members that encode proteins with a RING finger-like zinc finger motif. Despite being highly divergent in sequence, many of the SHI-related genes are partially redundant in function and synergistically promote gynoecium, stamen and leaf development in Arabidopsis.
XLOC_024697	XLOC_024697	AT5G11650	Chr5:3744734-3747140	WT	18	OK	62.2941	27.3299	-1.18862	-4.37324	5e-05	0.000622834	AT5G11650.1	alpha/beta-Hydrolases superfamily protein; FUNCTIONS IN: hydrolase activity; LOCATED IN: chloroplast; EXPRESSED IN: 24 plant structures; EXPRESSED DURING: 15 growth stages; BEST Arabidopsis thaliana protein match is: alpha/beta-Hydrolases superfamily protein (TAIR:AT1G73480.1); Has 1807 Blast hits to 1807 proteins in 277 species: Archae - 0; Bacteria - 0; Metazoa - 736; Fungi - 347; Plants - 385;…
XLOC_026445	XLOC_026445	AT5G44578	Chr5:17977176-17978638	WT	18	OK	38.7863	16.9911	-1.19077	-4.60611	5e-05	0.000622834	AT5G44578.1	unknown protein; FUNCTIONS IN: molecular_function unknown; INVOLVED IN: biological_process unknown; LOCATED IN: endomembrane system; Has 15 Blast hits to 15 proteins in 2 species: Archae - 0; Bacteria - 0; Metazoa - 0; Fungi - 0; Plants - 15; Viruses - 0; Other Eukaryotes - 0 (source: NCBI BLink).
XLOC_031073	XLOC_031073	AT5G65630	Chr5:26221931-26228449	WT	18	OK	46.9394	20.5556	-1.19127	-2.62347	5e-05	0.000622834	AT5G65630.1	This gene is predicted to encode a bromodomain-containing protein. Plant lines expressing RNAi constructs targeted against GTE7 show some resistance to agrobacterium-mediated root transformation.
XLOC_006955	XLOC_006955	AT1G63260	Chr1:23466745-23469222	WT	18	OK	4.07043	1.77854	-1.19449	-2.32551	0.00025	0.00258687	AT1G63260.1	Member of TETRASPANIN family
XLOC_005943	XLOC_005943	AT1G41830	Chr1:15603616-15607966	WT	18	OK	31.3321	13.6758	-1.19602	-4.55666	5e-05	0.000622834	AT1G41830.1	SKU5-similar 6 (SKS6); FUNCTIONS IN: pectinesterase activity; INVOLVED IN: oxidation reduction; LOCATED IN: apoplast, cell wall, membrane, plant-type cell wall; EXPRESSED IN: 23 plant structures; EXPRESSED DURING: 13 growth stages; CONTAINS InterPro DOMAIN/s: Cupredoxin (InterPro:IPR008972), Multicopper oxidase, type 2 (InterPro:IPR011706), Multicopper oxidase, type 3 (InterPro:IPR011707), Multic…
XLOC_004328	XLOC_004328	AT1G07260	Chr1:2223547-2229319	WT	18	OK	24.3246	10.6135	-1.19652	-1.96701	0.0033	0.0213417	AT1G07260.1	UDP-glucosyl transferase 71C3 (UGT71C3); FUNCTIONS IN: quercetin 3-O-glucosyltransferase activity, UDP-glycosyltransferase activity, transferase activity, transferring glycosyl groups; INVOLVED IN: metabolic process; LOCATED IN: cellular_component unknown; EXPRESSED IN: 7 plant structures; EXPRESSED DURING: F mature embryo stage, petal differentiation and expansion stage, E expanded cotyledon sta…
XLOC_003247	XLOC_003247	AT1G66160	Chr1:24637183-24641498	WT	18	OK	79.0265	34.447	-1.19796	-4.53095	5e-05	0.000622834	AT1G66160.1	CYS, MET, PRO, and GLY protein 1 (CMPG1); FUNCTIONS IN: ubiquitin-protein ligase activity, binding; INVOLVED IN: response to chitin; LOCATED IN: ubiquitin ligase complex; EXPRESSED IN: 18 plant structures; EXPRESSED DURING: 9 growth stages; CONTAINS InterPro DOMAIN/s: U box domain (InterPro:IPR003613), Armadillo-type fold (InterPro:IPR016024); BEST Arabidopsis thaliana protein match is: ARM repea…
XLOC_014532	XLOC_014532	AT3G28180	Chr3:10505828-10509239	WT	18	OK	393.105	171.346	-1.198	-3.30649	5e-05	0.000622834	AT3G28180.1	encodes a gene similar to cellulose synthase
XLOC_030449	XLOC_030449	AT5G53370	Chr5:21647881-21651593	WT	18	OK	16.8721	7.33608	-1.20156	-2.4312	5e-05	0.000622834	AT5G53370.1	pectin methylesterase PCR fragment F (PMEPCRF); FUNCTIONS IN: pectinesterase activity; INVOLVED IN: cell wall modification; LOCATED IN: cell wall; EXPRESSED IN: 22 plant structures; EXPRESSED DURING: 13 growth stages; CONTAINS InterPro DOMAIN/s: Pectinesterase, active site (InterPro:IPR018040), Pectin lyase fold/virulence factor (InterPro:IPR011050), Pectinesterase, catalytic (InterPro:IPR000070)…
XLOC_025351	XLOC_025351	AT5G25930	Chr5:9050793-9055251	WT	18	OK	86.6916	37.6867	-1.20184	-3.92084	5e-05	0.000622834	AT5G25930.1	Protein kinase family protein with leucine-rich repeat domain; FUNCTIONS IN: kinase activity; INVOLVED IN: protein amino acid phosphorylation; LOCATED IN: plasma membrane, membrane; EXPRESSED IN: 23 plant structures; EXPRESSED DURING: 14 growth stages; CONTAINS InterPro DOMAIN/s: Protein kinase, ATP binding site (InterPro:IPR017441), Protein kinase, catalytic domain (InterPro:IPR000719), Leucine-…
XLOC_012863	XLOC_012863	AT2G43620	Chr2:18093769-18095025	WT	18	OK	228.466	99.274	-1.20249	-5.09024	5e-05	0.000622834	AT2G43620.1	Chitinase family protein; FUNCTIONS IN: chitin binding, chitinase activity; INVOLVED IN: response to salt stress; LOCATED IN: apoplast; EXPRESSED IN: 12 plant structures; EXPRESSED DURING: 11 growth stages; CONTAINS InterPro DOMAIN/s: Chitin-binding, type 1, conserved site (InterPro:IPR018371), Glycoside hydrolase, family 19 (InterPro:IPR016283), Chitin-binding, type 1 (InterPro:IPR001002), Glyco…
XLOC_006699	XLOC_006699	AT1G58270	Chr1:21612115-21614117	WT	18	OK	39.7115	17.2543	-1.2026	-4.64526	5e-05	0.000622834	AT1G58270.1	ZW9 mRNA, complete cds
XLOC_025313	XLOC_025313	AT5G25160	Chr5:8687456-8688415	WT	18	OK	36.4479	15.8318	-1.20301	-4.62813	5e-05	0.000622834	AT5G25160.1	Encodes a zinc finger protein containing only a single zinc finger.
XLOC_023983	XLOC_023983	AT4G36950	Chr4:17422571-17423901	WT	18	OK	1.78571	0.775235	-1.20379	-1.97217	0.00535	0.0312779	AT4G36950.1	member of MEKK subfamily
XLOC_002351	XLOC_002351	AT1G49230	Chr1:18209260-18210128	WT	18	OK	13.8885	6.0181	-1.20652	-3.67457	5e-05	0.000622834	AT1G49230.1	RING/U-box superfamily protein; FUNCTIONS IN: zinc ion binding; EXPRESSED IN: 17 plant structures; EXPRESSED DURING: 11 growth stages; CONTAINS InterPro DOMAIN/s: Zinc finger, RING-type (InterPro:IPR001841), Zinc finger, C3HC4 RING-type (InterPro:IPR018957); BEST Arabidopsis thaliana protein match is: RING/U-box superfamily protein (TAIR:AT1G49200.1); Has 9168 Blast hits to 9144 proteins in 279 s…
XLOC_026443	XLOC_026443	AT5G44572,AT5G44574	Chr5:17967981-17971449	WT	18	OK	20.9084	9.05797	-1.20682	-3.20622	0.00015	0.00165462	AT5G44572.1	unknown protein; FUNCTIONS IN: molecular_function unknown; INVOLVED IN: biological_process unknown; LOCATED IN: endomembrane system; Has 7 Blast hits to 7 proteins in 2 species: Archae - 0; Bacteria - 0; Metazoa - 0; Fungi - 0; Plants - 7; Viruses - 0; Other Eukaryotes - 0 (source: NCBI BLink).
XLOC_009119	XLOC_009119	AT2G22860	Chr2:9737606-9738298	WT	18	OK	567.911	245.799	-1.20818	-5.80299	5e-05	0.000622834	AT2G22860.1	Phytosulfokine 2 precursor, coding for a unique plant peptide growth factor.
XLOC_028173	XLOC_028173	AT5G10946	Chr5:3455474-3457484	WT	18	OK	5.17017	2.23771	-1.20819	-2.17109	0.0007	0.00608993	AT5G10946.1	unknown protein; FUNCTIONS IN: molecular_function unknown; INVOLVED IN: biological_process unknown; LOCATED IN: endomembrane system; Has 30201 Blast hits to 17322 proteins in 780 species: Archae - 12; Bacteria - 1396; Metazoa - 17338; Fungi - 3422; Plants - 5037; Viruses - 0; Other Eukaryotes - 2996 (source: NCBI BLink).
XLOC_014300	XLOC_014300	AT3G23820	Chr3:8603240-8605462	WT	18	OK	159.587	69.0243	-1.20916	-4.27021	5e-05	0.000622834	AT3G23820.1	UDP-D-glucuronate 4-epimerase
XLOC_014299	XLOC_014299	AT3G23805	Chr3:8586381-8587056	WT	18	OK	22.1306	9.56229	-1.21062	-4.04947	5e-05	0.000622834	AT3G23805.1	Member of a diversely expressed predicted peptide family showing sequence similarity to tobacco Rapid Alkalinization Factor (RALF), and is believed to play an essential role in the physiology of Arabidopsis. Consists of a single exon and is characterized by a conserved C-terminal motif and N-terminal signal peptide.
XLOC_000687	XLOC_000687	AT1G14550	Chr1:4979027-4980324	WT	18	OK	9.96986	4.3036	-1.21203	-3.26304	5e-05	0.000622834	AT1G14550.1	Peroxidase superfamily protein; FUNCTIONS IN: peroxidase activity, heme binding; INVOLVED IN: oxidation reduction, response to oxidative stress; LOCATED IN: endomembrane system; EXPRESSED IN: root; CONTAINS InterPro DOMAIN/s: Haem peroxidase (InterPro:IPR010255), Plant peroxidase (InterPro:IPR000823), Peroxidases heam-ligand binding site (InterPro:IPR019793), Haem peroxidase, plant/fungal/bacteri…
XLOC_012072	XLOC_012072	AT2G29440	Chr2:12620059-12621148	WT	18	OK	63.4345	27.3539	-1.21352	-5.02223	5e-05	0.000622834	AT2G29440.1	Encodes glutathione transferase belonging to the tau class of GSTs. Naming convention according to Wagner et al. (2002).
XLOC_000173	XLOC_000173	AT1G04420	Chr1:1191607-1193884	WT	18	OK	2.86292	1.23386	-1.21432	-2.13831	0.00065	0.00575485	AT1G04420.1	NAD(P)-linked oxidoreductase superfamily protein; FUNCTIONS IN: oxidoreductase activity, aldo-keto reductase activity; INVOLVED IN: oxidation reduction; LOCATED IN: chloroplast, chloroplast stroma, chloroplast envelope; EXPRESSED IN: 23 plant structures; EXPRESSED DURING: 13 growth stages; CONTAINS InterPro DOMAIN/s: Aldo/keto reductase (InterPro:IPR001395); BEST Arabidopsis thaliana protein matc…
XLOC_025223	XLOC_025223	AT5G23360	Chr5:7861739-7862697	WT	18	OK	40.2219	17.3072	-1.21661	-4.61499	5e-05	0.000622834	AT5G23360.1	GRAM domain-containing protein / ABA-responsive protein-related; CONTAINS InterPro DOMAIN/s: GRAM (InterPro:IPR004182); BEST Arabidopsis thaliana protein match is: GRAM domain-containing protein / ABA-responsive protein-related (TAIR:AT5G23350.1); Has 1807 Blast hits to 1807 proteins in 277 species: Archae - 0; Bacteria - 0; Metazoa - 736; Fungi - 347; Plants - 385; Viruses - 0; Other Eukaryotes …
XLOC_000092	XLOC_000092	AT1G02810	Chr1:618264-620480	WT	18	OK	10.4949	4.51489	-1.21693	-3.86144	5e-05	0.000622834	AT1G02810.1	Plant invertase/pectin methylesterase inhibitor superfamily; FUNCTIONS IN: enzyme inhibitor activity, pectinesterase activity; INVOLVED IN: cell wall modification; LOCATED IN: endomembrane system, cell wall, plant-type cell wall; EXPRESSED IN: 14 plant structures; EXPRESSED DURING: 6 growth stages; CONTAINS InterPro DOMAIN/s: Pectinesterase, active site (InterPro:IPR018040), Pectin lyase fold/vir…
XLOC_001146	XLOC_001146	AT1G23030	Chr1:8156645-8159077	WT	18	OK	25.1279	10.8007	-1.21817	-4.34946	5e-05	0.000622834	AT1G23030.1	ARM repeat superfamily protein; FUNCTIONS IN: ubiquitin-protein ligase activity, binding; INVOLVED IN: response to chitin; LOCATED IN: ubiquitin ligase complex; EXPRESSED IN: 23 plant structures; EXPRESSED DURING: 15 growth stages; CONTAINS InterPro DOMAIN/s: U box domain (InterPro:IPR003613), Armadillo-like helical (InterPro:IPR011989), Armadillo (InterPro:IPR000225), Armadillo-type fold (InterP…
XLOC_004675	XLOC_004675	AT1G13610	Chr1:4663830-4666232	WT	18	OK	5.79296	2.4895	-1.21844	-2.63302	5e-05	0.000622834	AT1G13610.1	alpha/beta-Hydrolases superfamily protein; EXPRESSED IN: cotyledon, hypocotyl, root; CONTAINS InterPro DOMAIN/s: Alpha/beta hydrolase fold-1 (InterPro:IPR000073); BEST Arabidopsis thaliana protein match is: alpha/beta-Hydrolases superfamily protein (TAIR:AT3G30380.2); Has 4490 Blast hits to 4478 proteins in 963 species: Archae - 8; Bacteria - 1669; Metazoa - 672; Fungi - 266; Plants - 333; Viruse…
XLOC_018229	XLOC_018229	AT3G43960	Chr3:15774054-15775657	WT	18	OK	2.492	1.07089	-1.21849	-2.18521	0.00165	0.0121901	AT3G43960.1	Encodes a putative cysteine proteinase. Mutants exhibit shorter root hairs under phosphate-deficient conditions.
XLOC_006567	XLOC_006567	AT1G55330	Chr1:20637363-20648891	WT	18	OK	207.672	89.1628	-1.21979	-1.96676	0.00275	0.0184233	AT1G55330.1	Encodes a putative arabinogalactan-protein (AGP21).
XLOC_022746	XLOC_022746	AT4G14130	Chr4:8137050-8138281	WT	18	OK	11.4392	4.91051	-1.22005	-3.51574	5e-05	0.000622834	AT4G14130.1	xyloglucan endotransglycosylase-related protein (XTR7)
XLOC_006236	XLOC_006236	AT1G49310	Chr1:18237862-18238367	WT	18	OK	189.6	81.3699	-1.22039	-6.75287	5e-05	0.000622834	AT1G49310.1	unknown protein; FUNCTIONS IN: molecular_function unknown; INVOLVED IN: biological_process unknown; LOCATED IN: endomembrane system; EXPRESSED IN: 9 plant structures; EXPRESSED DURING: LP.04 four leaves visible, petal differentiation and expansion stage; Has 11 Blast hits to 11 proteins in 6 species: Archae - 0; Bacteria - 0; Metazoa - 0; Fungi - 0; Plants - 11; Viruses - 0; Other Eukaryotes - 0 …
XLOC_030775	XLOC_030775	AT5G59730	Chr5:24063876-24066170	WT	18	OK	5.92921	2.54382	-1.22084	-2.1558	0.0012	0.00948481	AT5G59730.1	A member of EXO70 gene family, putative exocyst subunits, conserved in land plants. Arabidopsis thaliana contains 23 putative EXO70 genes, which can be classified into eight clusters on the phylogenetic tree.
XLOC_016001	XLOC_016001	AT3G60550	Chr3:22379804-22380641	WT	18	OK	36.3109	15.5639	-1.2222	-4.87687	5e-05	0.000622834	AT3G60550.1	cyclin p3;2 (CYCP3;2); CONTAINS InterPro DOMAIN/s: Negative regulatory factor PREG (InterPro:IPR012389), Cyclin-like (InterPro:IPR011028), Cyclin-related 2 (InterPro:IPR013922); BEST Arabidopsis thaliana protein match is: cyclin p3;1 (TAIR:AT2G45080.1); Has 1360 Blast hits to 1354 proteins in 218 species: Archae - 0; Bacteria - 18; Metazoa - 236; Fungi - 630; Plants - 217; Viruses - 0; Other Euka…
XLOC_014365	XLOC_014365	AT3G25190	Chr3:9174456-9175776	WT	18	OK	9.78169	4.18951	-1.2233	-3.15041	0.0002	0.00212981	AT3G25190.1	The gene encodes nodulin-like21 whose transcript abundance was repressed under conditions of Fe-deficient growth.
XLOC_003674	XLOC_003674	AT1G74400	Chr1:27963952-27965341	WT	18	OK	8.82173	3.77797	-1.22345	-3.35519	5e-05	0.000622834	AT1G74400.1	Tetratricopeptide repeat (TPR)-like superfamily protein; CONTAINS InterPro DOMAIN/s: Pentatricopeptide repeat (InterPro:IPR002885); BEST Arabidopsis thaliana protein match is: Tetratricopeptide repeat (TPR)-like superfamily protein (TAIR:AT4G21065.1); Has 30893 Blast hits to 12576 proteins in 195 species: Archae - 0; Bacteria - 17; Metazoa - 10; Fungi - 48; Plants - 30449; Viruses - 0; Other Euka…
XLOC_018248	XLOC_018248	AT3G44190	Chr3:15901793-15903610	WT	18	OK	128.957	55.2108	-1.22386	-4.20021	5e-05	0.000622834	AT3G44190.1	FAD/NAD(P)-binding oxidoreductase family protein; FUNCTIONS IN: electron carrier activity, oxidoreductase activity, FAD binding; INVOLVED IN: oxidation reduction; EXPRESSED IN: 25 plant structures; EXPRESSED DURING: 15 growth stages; CONTAINS InterPro DOMAIN/s: Pyridine nucleotide-disulphide oxidoreductase, class-II (InterPro:IPR000103), FAD-dependent pyridine nucleotide-disulphide oxidoreductase…
XLOC_025923	XLOC_025923	AT5G35900	Chr5:14028476-14029436	WT	18	OK	6.18811	2.64224	-1.22774	-2.20343	0.0005	0.00460825	AT5G35900.1	LOB domain-containing protein 35 (LBD35); INVOLVED IN: biological_process unknown; LOCATED IN: endomembrane system; CONTAINS InterPro DOMAIN/s: Lateral organ boundaries, LOB (InterPro:IPR004883); BEST Arabidopsis thaliana protein match is: LOB domain-containing protein 32 (TAIR:AT4G22700.1); Has 1807 Blast hits to 1807 proteins in 277 species: Archae - 0; Bacteria - 0; Metazoa - 736; Fungi - 347;…
XLOC_006373	XLOC_006373	AT1G51940	Chr1:19295903-19299118	WT	18	OK	2.12332	0.906211	-1.2284	-2.62236	0.0006	0.00536361	AT1G51940.1	Encodes a LysM-containing receptor-like kinase. Induction of chitin-responsive genes by chitin treatment is not blocked in the mutant.
XLOC_005625	XLOC_005625	AT1G32640	Chr1:11798809-11800988	WT	18	OK	93.5351	39.9193	-1.22842	-4.36379	5e-05	0.000622834	AT1G32640.1	Encodes a MYC-related transcriptional activator with a typical DNA binding domain of a basic helix-loop-helix leucine zipper motif. Binds to an extended G-Box promoter motif and interacts with Jasmonate ZIM-domain proteins. Its transcription is induced by dehydration stress and ABA treatment. Negative regulator of blue light?mediated photomorphogenic growth and blue and far-red-light?regulated ge…
XLOC_026160	XLOC_026160	AT5G40030	Chr5:16026226-16028283	WT	18	OK	2.80829	1.19817	-1.22886	-2.49061	0.0007	0.00608993	AT5G40030.1	Protein kinase superfamily protein; FUNCTIONS IN: kinase activity; INVOLVED IN: protein amino acid phosphorylation; LOCATED IN: chloroplast; EXPRESSED IN: shoot apex, embryo, root, flower, seed; EXPRESSED DURING: F mature embryo stage, petal differentiation and expansion stage, E expanded cotyledon stage, D bilateral stage; CONTAINS InterPro DOMAIN/s: Protein kinase, catalytic domain (InterPro:IP…
XLOC_013440	XLOC_013440	AT3G08030	Chr3:2564032-2566002	WT	18	OK	77.3147	32.9105	-1.23219	-4.48456	5e-05	0.000622834	AT3G08030.1	Protein of unknown function, DUF642; FUNCTIONS IN: molecular_function unknown; INVOLVED IN: biological_process unknown; LOCATED IN: cell wall; EXPRESSED IN: 22 plant structures; EXPRESSED DURING: 14 growth stages; CONTAINS InterPro DOMAIN/s: Protein of unknown function DUF642 (InterPro:IPR006946); BEST Arabidopsis thaliana protein match is: Protein of unknown function, DUF642 (TAIR:AT2G41800.1); …
XLOC_007624	XLOC_007624	AT1G76360	Chr1:28639556-28646712	WT	18	OK	12.9277	5.48568	-1.23673	-2.01809	0.0008	0.00681788	AT1G76360.1	Protein kinase superfamily protein; FUNCTIONS IN: protein serine/threonine kinase activity, protein kinase activity, kinase activity, ATP binding; INVOLVED IN: protein amino acid phosphorylation; LOCATED IN: chloroplast; EXPRESSED IN: 16 plant structures; EXPRESSED DURING: 9 growth stages; CONTAINS InterPro DOMAIN/s: Protein kinase, ATP binding site (InterPro:IPR017441), Protein kinase, catalytic…
XLOC_000015	XLOC_000015	AT1G01300	Chr1:116942-118764	WT	18	OK	26.0639	11.0324	-1.24031	-4.80341	5e-05	0.000622834	AT1G01300.1	Eukaryotic aspartyl protease family protein; FUNCTIONS IN: aspartic-type endopeptidase activity; INVOLVED IN: proteolysis, response to karrikin; LOCATED IN: membrane, plant-type cell wall; EXPRESSED IN: 22 plant structures; EXPRESSED DURING: 13 growth stages; CONTAINS InterPro DOMAIN/s: Peptidase aspartic (InterPro:IPR021109), Peptidase aspartic, catalytic (InterPro:IPR009007), Peptidase A1 (Inte…
XLOC_028480	XLOC_028480	AT5G17160	Chr5:5639645-5642513	WT	18	OK	13.6438	5.77454	-1.24047	-3.89423	5e-05	0.000622834	AT5G17160.1	unknown protein; BEST Arabidopsis thaliana protein match is: unknown protein (TAIR:AT3G03130.1); Has 14330 Blast hits to 10381 proteins in 896 species: Archae - 94; Bacteria - 2881; Metazoa - 4019; Fungi - 1576; Plants - 515; Viruses - 110; Other Eukaryotes - 5135 (source: NCBI BLink).
XLOC_029777	XLOC_029777	AT5G41400	Chr5:16569376-16570177	WT	18	OK	16.7524	7.08759	-1.241	-4.06535	5e-05	0.000622834	AT5G41400.1	RING/U-box superfamily protein; FUNCTIONS IN: zinc ion binding; LOCATED IN: endomembrane system; EXPRESSED IN: 17 plant structures; EXPRESSED DURING: 8 growth stages; CONTAINS InterPro DOMAIN/s: Zinc finger, RING-type (InterPro:IPR001841), Zinc finger, C3HC4 RING-type (InterPro:IPR018957); BEST Arabidopsis thaliana protein match is: RING/U-box superfamily protein (TAIR:AT1G63840.1); Has 1807 Blas…
XLOC_025301	XLOC_025301	AT5G24930	Chr5:8589233-8591236	WT	18	OK	1.58219	0.668214	-1.24354	-2.02316	0.003	0.0197289	AT5G24930.1	CONSTANS-like 4 (COL4); FUNCTIONS IN: sequence-specific DNA binding transcription factor activity, zinc ion binding; INVOLVED IN: regulation of transcription; LOCATED IN: intracellular, chloroplast; EXPRESSED IN: 21 plant structures; EXPRESSED DURING: 13 growth stages; CONTAINS InterPro DOMAIN/s: CCT domain (InterPro:IPR010402), Zinc finger, B-box (InterPro:IPR000315); BEST Arabidopsis thaliana p…
XLOC_002562	XLOC_002562	AT1G53163	Chr1:19812261-19813286	WT	18	OK	3.20859	1.35414	-1.24456	-2.36308	0.00165	0.0121901	AT1G53163.1	unknown protein; FUNCTIONS IN: molecular_function unknown; INVOLVED IN: biological_process unknown; LOCATED IN: cellular_component unknown; BEST Arabidopsis thaliana protein match is: unknown protein (TAIR:AT3G15250.1); Has 315 Blast hits to 216 proteins in 74 species: Archae - 0; Bacteria - 86; Metazoa - 43; Fungi - 52; Plants - 27; Viruses - 1; Other Eukaryotes - 106 (source: NCBI BLink).
XLOC_025412	XLOC_025412	AT5G27000	Chr5:9497979-9503134	WT	18	OK	7.15811	3.02062	-1.24473	-3.55508	5e-05	0.000622834	AT5G27000.1	Encodes a kinesin-like protein that binds microtubules in an ATP-dependent manner.
XLOC_019112	XLOC_019112	AT3G59370	Chr3:21941864-21942571	WT	18	OK	11.0274	4.6452	-1.24728	-3.14177	0.00045	0.00422513	AT3G59370.1	Vacuolar calcium-binding protein-related; Has 1012 Blast hits to 386 proteins in 97 species: Archae - 12; Bacteria - 133; Metazoa - 361; Fungi - 73; Plants - 75; Viruses - 49; Other Eukaryotes - 309 (source: NCBI BLink).
XLOC_015858	XLOC_015858	AT3G57450	Chr3:21261670-21266042	WT	18	OK	413.714	174.151	-1.24829	-5.55171	5e-05	0.000622834	AT3G57450.1	unknown protein; Has 65 Blast hits to 65 proteins in 11 species: Archae - 0; Bacteria - 0; Metazoa - 0; Fungi - 0; Plants - 65; Viruses - 0; Other Eukaryotes - 0 (source: NCBI BLink).
XLOC_000083	XLOC_000083	AT1G02640	Chr1:564204-567769	WT	18	OK	12.0062	5.04924	-1.24965	-4.14141	5e-05	0.000622834	AT1G02640.1	encodes a protein similar to a beta-xylosidase located in the extracellular matrix. This is a member of glycosyl hydrolase family 3 and has six other closely related members.
XLOC_010431	XLOC_010431	AT2G46820	Chr2:19243495-19245141	WT	18	OK	8.60442	3.61748	-1.25009	-2.68064	5e-05	0.000622834	AT2G46820.1	Encodes the P subunit of Photosystem I. About 25% of the TMP14 pool appeared to be phosphorylated, and this ratio is not affected by light. Contains seven phosphorylation sites on threonine residue and chloroplast targeting signal. Located in the proximity of PSI-L, -H and -O subunits.
XLOC_015640	XLOC_015640	AT3G53130,AT3G53140	Chr3:19692764-19697542	WT	18	OK	1.7772	0.746877	-1.25066	-2.44641	0.0001	0.00115693	AT3G53130.1	Lutein-deficient 1 (LUT1) required for lutein biosynthesis, member of the xanthophyll class of carotenoids. Involved in epsilon ring hydroxylation. Maps at 67.3 cM on chromosome 3.
XLOC_017591	XLOC_017591	AT3G27210	Chr3:10045185-10047428	WT	18	OK	90.093	37.7983	-1.25309	-4.33483	5e-05	0.000622834	AT3G27210.1	unknown protein; FUNCTIONS IN: molecular_function unknown; INVOLVED IN: N-terminal protein myristoylation; LOCATED IN: plasma membrane; EXPRESSED IN: 22 plant structures; EXPRESSED DURING: 13 growth stages; BEST Arabidopsis thaliana protein match is: unknown protein (TAIR:AT5G40860.1); Has 133 Blast hits to 98 proteins in 25 species: Archae - 0; Bacteria - 6; Metazoa - 32; Fungi - 7; Plants - 70;…
XLOC_000563	XLOC_000563	AT1G12140	Chr1:4121285-4125648	WT	18	OK	57.7488	24.22	-1.2536	-4.71592	5e-05	0.000622834	AT1G12140.1	belongs to the flavin-monooxygenase (FMO) family, encodes a glucosinolate S-oxygenase that catalyzes the conversion of methylthioalkyl glucosinolates to methylsulfinylalkyl glucosinolates
XLOC_024433	XLOC_024433	AT5G05950,AT5G05960	Chr5:1788766-1792634	WT	18	OK	1271.74	533.355	-1.25363	-5.71618	5e-05	0.000622834	AT5G05950.1	maternal effect embryo arrest 60 (MEE60); FUNCTIONS IN: molecular_function unknown; INVOLVED IN: embryo development ending in seed dormancy; LOCATED IN: endomembrane system; EXPRESSED IN: 22 plant structures; EXPRESSED DURING: 13 growth stages; BEST Arabidopsis thaliana protein match is: unknown protein (TAIR:AT3G46890.1); Has 1807 Blast hits to 1807 proteins in 277 species: Archae - 0; Bacteria …
XLOC_029571	XLOC_029571	AT5G37770	Chr5:14995621-14999619	WT	18	OK	390.991	163.962	-1.25377	-3.89741	5e-05	0.000622834	AT5G37770.1	Encodes a protein with 40% similarity to calmodulin. Binds Ca(2+) and, as a consequence, undergoes conformational changes. CML24 expression occurs in all major organs, and transcript levels are increased from 2- to 15-fold in plants subjected to touch, darkness, heat, cold, hydrogen peroxide, abscisic acid (ABA), and indole-3-acetic acid. However, CML24 protein accumulation changes were not detec…
XLOC_023315	XLOC_023315	AT4G24015	Chr4:12466344-12475410	WT	18	OK	28.5638	11.9559	-1.25647	-3.57006	5e-05	0.000622834	AT4G24015.1	RING/U-box superfamily protein; FUNCTIONS IN: zinc ion binding; INVOLVED IN: biological_process unknown; LOCATED IN: cellular_component unknown; CONTAINS InterPro DOMAIN/s: Zinc finger, RING-type (InterPro:IPR001841); BEST Arabidopsis thaliana protein match is: RING/U-box superfamily protein (TAIR:AT4G10150.1); Has 35333 Blast hits to 34131 proteins in 2444 species: Archae - 798; Bacteria - 22429…
XLOC_010427	XLOC_010427	AT2G46780	Chr2:19229056-19231505	WT	18	OK	24.9246	10.4317	-1.2566	-4.07222	5e-05	0.000622834	AT2G46780.1	RNA-binding (RRM/RBD/RNP motifs) family protein; FUNCTIONS IN: RNA binding, nucleotide binding, nucleic acid binding; INVOLVED IN: biological_process unknown; LOCATED IN: cellular_component unknown; EXPRESSED IN: 22 plant structures; EXPRESSED DURING: 13 growth stages; CONTAINS InterPro DOMAIN/s: RNA recognition motif, RNP-1 (InterPro:IPR000504), Nucleotide-binding, alpha-beta plait (InterPro:IPR…
XLOC_012491	XLOC_012491	AT2G36880	Chr2:15479365-15481412	WT	18	OK	713.938	298.664	-1.25728	-3.31265	5e-05	0.000622834	AT2G36880.1	methionine adenosyltransferase 3 (MAT3); FUNCTIONS IN: copper ion binding, methionine adenosyltransferase activity; INVOLVED IN: one-carbon metabolic process, S-adenosylmethionine biosynthetic process; LOCATED IN: plasma membrane; EXPRESSED IN: 27 plant structures; EXPRESSED DURING: 17 growth stages; CONTAINS InterPro DOMAIN/s: S-adenosylmethionine synthetase (InterPro:IPR002133), S-adenosylmethi…
XLOC_001500	XLOC_001500	AT1G30135	Chr1:10596491-10597239	WT	18	OK	106.511	44.5184	-1.25853	-5.3087	5e-05	0.000622834	AT1G30135.1	jasmonate-zim-domain protein 8 (JAZ8); CONTAINS InterPro DOMAIN/s: Tify (InterPro:IPR010399), CCT domain-like (InterPro:IPR018467); BEST Arabidopsis thaliana protein match is: jasmonate-zim-domain protein 7 (TAIR:AT2G34600.1); Has 89 Blast hits to 89 proteins in 12 species: Archae - 0; Bacteria - 0; Metazoa - 0; Fungi - 0; Plants - 89; Viruses - 0; Other Eukaryotes - 0 (source: NCBI BLink).
XLOC_016495	XLOC_016495	AT3G06770	Chr3:2134799-2137228	WT	18	OK	2.56549	1.07211	-1.25878	-2.35525	0.00055	0.00498267	AT3G06770.2	Pectin lyase-like superfamily protein; FUNCTIONS IN: polygalacturonase activity; INVOLVED IN: response to cyclopentenone, carbohydrate metabolic process; LOCATED IN: endomembrane system; EXPRESSED IN: 24 plant structures; EXPRESSED DURING: 15 growth stages; CONTAINS InterPro DOMAIN/s: Pectin lyase fold/virulence factor (InterPro:IPR011050), Glycoside hydrolase, family 28 (InterPro:IPR000743), Pec…
XLOC_018476	XLOC_018476	AT3G47860	Chr3:17656669-17658316	WT	18	OK	6.11501	2.5552	-1.25892	-3.01567	5e-05	0.000622834	AT3G47860.1	Encodes a chloroplastic lipocalin AtCHL. Located in thylakoid lumen. Involved in the protection of thylakoidal membrane lipids against reactive oxygen species, especially singlet oxygen, produced upon excess light.
XLOC_020313	XLOC_020313	AT4G13340	Chr4:7758609-7761057	WT	18	OK	84.2392	35.1796	-1.25975	-5.43294	5e-05	0.000622834	AT4G13340.1	Leucine-rich repeat (LRR) family protein; FUNCTIONS IN: structural constituent of cell wall; LOCATED IN: cell wall, plant-type cell wall; EXPRESSED IN: 23 plant structures; EXPRESSED DURING: 13 growth stages; CONTAINS InterPro DOMAIN/s: Leucine-rich repeat-containing N-terminal domain, type 2 (InterPro:IPR013210); BEST Arabidopsis thaliana protein match is: Leucine-rich repeat (LRR) family protei…
XLOC_028182	XLOC_028182	AT5G11070	Chr5:3516216-3516995	WT	18	OK	265.304	110.667	-1.26142	-5.3321	5e-05	0.000622834	AT5G11070.1	unknown protein; Has 1807 Blast hits to 1807 proteins in 277 species: Archae - 0; Bacteria - 0; Metazoa - 736; Fungi - 347; Plants - 385; Viruses - 0; Other Eukaryotes - 339 (source: NCBI BLink).
XLOC_003376	XLOC_003376	AT1G68500	Chr1:25702002-25702511	WT	18	OK	12.3393	5.14582	-1.26179	-3.4382	0.0004	0.00385261	AT1G68500.1	unknown protein; BEST Arabidopsis thaliana protein match is: unknown protein (TAIR:AT1G25422.1); Has 16 Blast hits to 16 proteins in 6 species: Archae - 0; Bacteria - 0; Metazoa - 0; Fungi - 0; Plants - 16; Viruses - 0; Other Eukaryotes - 0 (source: NCBI BLink).
XLOC_007682	XLOC_007682	AT1G77380	Chr1:29073842-29077390	WT	18	OK	49.6131	20.662	-1.26374	-2.69914	5e-05	0.000622834	AT1G77380.1	Amino acid permease which transports basic amino acids.
XLOC_004499	XLOC_004499	AT1G10370	Chr1:3397080-3398358	WT	18	OK	6.81668	2.83792	-1.26424	-3.09101	5e-05	0.000622834	AT1G10370.1	Encodes GSTU17 (Glutathione S-Transferase U17). Functions as a negative component of stress-mediated signal transduction pathways in drought and salt stress responses.
XLOC_006642	XLOC_006642	AT1G56480	Chr1:21146238-21153130	WT	18	OK	13.9304	5.79931	-1.26428	-1.80321	0.00675	0.0373936	AT1G56480.1	pseudogene, pectinesterase, blastp match of 65% identity and 9.5e-47 P-value to GP|14495216|dbj|BAB60935.1||AP003578 putative pectin methylesterase {Oryza sativa (japonica cultivar-group)}
XLOC_009967	XLOC_009967	AT2G38380	Chr2:16076383-16078583	WT	18	OK	219.289	91.2164	-1.26547	-5.1353	5e-05	0.000622834	AT2G38380.1	Peroxidase superfamily protein; FUNCTIONS IN: peroxidase activity, heme binding; INVOLVED IN: response to zinc ion, response to salt stress; LOCATED IN: plant-type cell wall; EXPRESSED IN: stem, root; CONTAINS InterPro DOMAIN/s: Haem peroxidase (InterPro:IPR010255), Plant peroxidase (InterPro:IPR000823), Peroxidases heam-ligand binding site (InterPro:IPR019793), Peroxidase, active site (InterPro:…
XLOC_014331	XLOC_014331	AT3G24520	Chr3:8938105-8942874	WT	18	OK	44.8688	18.6461	-1.26684	-4.58033	5e-05	0.000622834	AT3G24520.1	member of Heat Stress Transcription Factor (Hsf) family
XLOC_024705	XLOC_024705	AT5G11740,AT5G11750,AT5G11760	Chr5:3784084-3790452	WT	18	OK	1995.02	825.016	-1.27391	-5.60414	5e-05	0.000622834	AT5G11740.1	Encodes arabinogalactan protein (AGP15).
XLOC_003544	XLOC_003544	AT1G71740	Chr1:26987244-26987637	WT	18	OK	21.6542	8.95016	-1.27467	-4.58714	0.0003	0.0030153	AT1G71740.1	unknown protein; Has 82 Blast hits to 82 proteins in 12 species: Archae - 0; Bacteria - 0; Metazoa - 0; Fungi - 0; Plants - 82; Viruses - 0; Other Eukaryotes - 0 (source: NCBI BLink).
XLOC_021498	XLOC_021498	AT4G35070	Chr4:16694169-16695698	WT	18	OK	1.14689	0.473999	-1.27477	-1.4754	0.00935	0.0480204	AT4G35070.1	SBP (S-ribonuclease binding protein) family protein; CONTAINS InterPro DOMAIN/s: S-ribonuclease binding protein, SBP1, pollen (InterPro:IPR017066); BEST Arabidopsis thaliana protein match is: S-ribonuclease binding protein 1 (TAIR:AT1G45976.1); Has 975 Blast hits to 929 proteins in 127 species: Archae - 2; Bacteria - 21; Metazoa - 288; Fungi - 13; Plants - 377; Viruses - 18; Other Eukaryotes - 25…
XLOC_025020	XLOC_025020	AT5G18670	Chr5:6225955-6228132	WT	18	OK	49.0081	20.1992	-1.27872	-4.90435	5e-05	0.000622834	AT5G18670.1	putative beta-amylase BMY3 (BMY3)
XLOC_014404	XLOC_014404	AT3G25780	Chr3:9409289-9410567	WT	18	OK	424.287	174.868	-1.27878	-4.64035	5e-05	0.000622834	AT3G25780.1	Encodes allene oxide cyclase, one of the enzymes involved in jasmonic acid biosynthesis. One of four genes in Arabidopsis that encode this enzyme. mRNA expression is upregulated in senescing leaves. Note: Nomenclature for Arabidopsis allene oxide cyclase 3 (AOC3, AT3G25780) gene is based on Stenzel et al. 2003 Plant Molecular Biology 51:895-911. AOC3 (AT3G25780) is also referred to as AOC2 in He …
XLOC_016093	XLOC_016093	AT3G62010	Chr3:22964287-22972268	WT	18	OK	64.227	26.4639	-1.27915	-3.94992	5e-05	0.000622834	AT3G62010.1	unknown protein; LOCATED IN: cellular_component unknown; EXPRESSED IN: 23 plant structures; EXPRESSED DURING: 15 growth stages; Has 553 Blast hits to 216 proteins in 93 species: Archae - 0; Bacteria - 124; Metazoa - 193; Fungi - 58; Plants - 108; Viruses - 0; Other Eukaryotes - 70 (source: NCBI BLink).
XLOC_007395	XLOC_007395	AT1G71380	Chr1:26899783-26901789	WT	18	OK	5.75326	2.37044	-1.27922	-3.35586	5e-05	0.000622834	AT1G71380.1	cellulase 3 (CEL3); FUNCTIONS IN: hydrolase activity, hydrolyzing O-glycosyl compounds, catalytic activity; INVOLVED IN: carbohydrate metabolic process; LOCATED IN: cell wall, plasma membrane, plant-type cell wall; EXPRESSED IN: 7 plant structures; EXPRESSED DURING: L mature pollen stage, M germinated pollen stage, 4 anthesis, petal differentiation and expansion stage; CONTAINS InterPro DOMAIN/s:…
XLOC_020019	XLOC_020019	AT4G08685	Chr4:5550428-5553152	WT	18	OK	62.6673	25.8021	-1.28022	-3.06542	0.0003	0.0030153	AT4G08685.1	Encodes a protein, expressed in leaves, with similarity to pollen allergens.
XLOC_026406	XLOC_026406	AT5G44030	Chr5:17714644-17721580	WT	18	OK	26.9759	11.1054	-1.28041	-4.53197	5e-05	0.000622834	AT5G44030.1	Encodes a cellulose synthase involved in secondary cell wall biosynthesis. Confers resistance towards bacterial and fungal pathogens, independent of salicylic acid, ethylene and jasmonate signaling.
XLOC_016494	XLOC_016494	AT3G06750	Chr3:2129622-2130315	WT	18	OK	71.2949	29.339	-1.28098	-5.96934	5e-05	0.000622834	AT3G06750.1	hydroxyproline-rich glycoprotein family protein; Has 6317 Blast hits to 3436 proteins in 319 species: Archae - 0; Bacteria - 429; Metazoa - 2195; Fungi - 739; Plants - 2175; Viruses - 83; Other Eukaryotes - 696 (source: NCBI BLink).
XLOC_009880	XLOC_009880	AT2G36650	Chr2:15359914-15364398	WT	18	OK	64.467	26.5005	-1.28254	-4.45624	5e-05	0.000622834	AT2G36650.1	unknown protein; Has 35333 Blast hits to 34131 proteins in 2444 species: Archae - 798; Bacteria - 22429; Metazoa - 974; Fungi - 991; Plants - 531; Viruses - 0; Other Eukaryotes - 9610 (source: NCBI BLink).
XLOC_028163	XLOC_028163	AT5G10770	Chr5:3403109-3405448	WT	18	OK	21.9392	9.01457	-1.28318	-4.66813	5e-05	0.000622834	AT5G10770.1	Eukaryotic aspartyl protease family protein; FUNCTIONS IN: DNA binding, aspartic-type endopeptidase activity; INVOLVED IN: proteolysis; EXPRESSED IN: 12 plant structures; EXPRESSED DURING: 4 anthesis, C globular stage, petal differentiation and expansion stage, E expanded cotyledon stage; CONTAINS InterPro DOMAIN/s: Peptidase aspartic (InterPro:IPR021109), Peptidase aspartic, catalytic (InterPro:…
XLOC_004637	XLOC_004637	AT1G12900	Chr1:4392449-4394400	WT	18	OK	1.12606	0.462343	-1.28425	-1.30419	0.00645	0.0361081	AT1G12900.1	glyceraldehyde 3-phosphate dehydrogenase A subunit 2 (GAPA-2); FUNCTIONS IN: NAD or NADH binding, glyceraldehyde-3-phosphate dehydrogenase activity; INVOLVED IN: oxidation reduction, glycolysis, glucose metabolic process; LOCATED IN: apoplast, chloroplast stroma, chloroplast, membrane, chloroplast envelope; EXPRESSED IN: 24 plant structures; EXPRESSED DURING: 14 growth stages; CONTAINS InterPro D…
XLOC_028441	XLOC_028441	AT5G16360	Chr5:5355081-5356340	WT	18	OK	121.462	49.8275	-1.28549	-4.68935	5e-05	0.000622834	AT5G16360.1	NC domain-containing protein-related; CONTAINS InterPro DOMAIN/s: NC (InterPro:IPR007053); BEST Arabidopsis thaliana protein match is: NC domain-containing protein-related (TAIR:AT3G02700.1); Has 1807 Blast hits to 1807 proteins in 277 species: Archae - 0; Bacteria - 0; Metazoa - 736; Fungi - 347; Plants - 385; Viruses - 0; Other Eukaryotes - 339 (source: NCBI BLink).
XLOC_000948	XLOC_000948	AT1G19380	Chr1:6698057-6698824	WT	18	OK	152.36	62.3808	-1.28831	-6.31532	5e-05	0.000622834	AT1G19380.1	Protein of unknown function (DUF1195); CONTAINS InterPro DOMAIN/s: Protein of unknown function DUF1195 (InterPro:IPR010608); BEST Arabidopsis thaliana protein match is: Protein of unknown function (DUF1195) (TAIR:AT4G36660.1); Has 67 Blast hits to 67 proteins in 15 species: Archae - 0; Bacteria - 0; Metazoa - 0; Fungi - 0; Plants - 67; Viruses - 0; Other Eukaryotes - 0 (source: NCBI BLink).
XLOC_007652	XLOC_007652	AT1G76930	Chr1:28895300-28897536	WT	18	OK	441.259	180.662	-1.28834	-5.01241	5e-05	0.000622834	AT1G76930.1	Encodes an Arabidopsis extensin gene that belongs to cell-wall hydroxyproline-rich glycoproteins. The cross-link of extensins enforces cell wall strength. Transgenic plants overexpressing this gene show an increase in stem thickness.
XLOC_021662	XLOC_021662	AT4G38410	Chr4:17980939-17981719	WT	18	OK	3.40377	1.39315	-1.28878	-2.13689	0.00435	0.0266671	AT4G38410.1	Dehydrin family protein; FUNCTIONS IN: molecular_function unknown; INVOLVED IN: response to water, response to stress; LOCATED IN: cellular_component unknown; EXPRESSED IN: stem, hypocotyl, root; CONTAINS InterPro DOMAIN/s: Dehydrin (InterPro:IPR000167); Has 3050 Blast hits to 2020 proteins in 252 species: Archae - 4; Bacteria - 32; Metazoa - 564; Fungi - 141; Plants - 1342; Viruses - 0; Other Eu…
XLOC_007208	XLOC_007208	AT1G67830	Chr1:25431585-25432990	WT	18	OK	2.33963	0.955043	-1.29264	-2.31805	0.00165	0.0121901	AT1G67830.1	Encodes a protein with &#945;-fucosidase activity. The activity was assessed on 2'-fucosyl-lactitol. AtFXG1 was able to remove the t-fucosyl residues of XXFG xyloglucan oligosaccharides.
XLOC_025368	XLOC_025368	AT5G26260	Chr5:9200462-9202400	WT	18	OK	132.789	54.1823	-1.29324	-4.92281	5e-05	0.000622834	AT5G26260.1	TRAF-like family protein; FUNCTIONS IN: molecular_function unknown; INVOLVED IN: biological_process unknown; LOCATED IN: chloroplast; EXPRESSED IN: hypocotyl, root, callus; CONTAINS InterPro DOMAIN/s: TRAF-like (InterPro:IPR008974), MATH (InterPro:IPR002083); BEST Arabidopsis thaliana protein match is: TRAF-like family protein (TAIR:AT5G26280.1); Has 30201 Blast hits to 17322 proteins in 780 spec…
XLOC_012049	XLOC_012049	AT2G28950	Chr2:12431340-12433595	WT	18	OK	23.3726	9.52778	-1.29461	-4.67617	5e-05	0.000622834	AT2G28950.1	Encodes an expansin. Naming convention from the Expansin Working Group (Kende et al, 2004. Plant Mol Bio). Involved in the formation of nematode-induced syncytia in roots of Arabidopsis thaliana.
XLOC_021608	XLOC_021608	AT4G37260	Chr4:17540489-17549538	WT	18	OK	56.5516	23.048	-1.29492	-2.81414	5e-05	0.000622834	AT4G37260.1	Member of the R2R3 factor gene family.
XLOC_022698	XLOC_022698	AT4G13420	Chr4:7796849-7802251	WT	18	OK	1.36441	0.555258	-1.29705	-2.34181	0.0007	0.00608993	AT4G13420.1	Encodes a protein of the KUP/HAK/KT potassium channel class that is upregulated in the roots by K levels.
XLOC_003551	XLOC_003551	AT1G71880	Chr1:27054179-27056341	WT	18	OK	162.247	65.9981	-1.29769	-5.21839	5e-05	0.000622834	AT1G71880.1	Sucrose transporter gene induced in response to nematodes; member of Sucrose-proton symporter family.
XLOC_023929	XLOC_023929	AT4G35985	Chr4:17032267-17033862	WT	18	OK	46.5436	18.9133	-1.29919	-4.89075	5e-05	0.000622834	AT4G35985.1	Senescence/dehydration-associated protein-related; LOCATED IN: chloroplast; EXPRESSED IN: 19 plant structures; EXPRESSED DURING: 10 growth stages; CONTAINS InterPro DOMAIN/s: Senescence/spartin-associated (InterPro:IPR009686); BEST Arabidopsis thaliana protein match is: Senescence/dehydration-associated protein-related (TAIR:AT2G17840.1); Has 30201 Blast hits to 17322 proteins in 780 species: Arc…
XLOC_007683	XLOC_007683	AT1G77390	Chr1:29081903-29084285	WT	18	OK	1.98942	0.807743	-1.30038	-2.3235	0.0033	0.0213417	AT1G77390.1	Encodes a core cell cycle gene involved in meiosis II during microsporogenesis. Recessive mutants exhibit delayed and asynchronous meiosis in pollen mother cell populations and uncoordinated nuclear division and cytokinesis resulting in dyad microspores.
XLOC_031044	XLOC_031044	AT5G65160	Chr5:26031183-26033889	WT	18	OK	8.96292	3.6316	-1.30336	-3.86828	5e-05	0.000622834	AT5G65160.1	Encodes one of the 36 carboxylate clamp (CC)-tetratricopeptide repeat (TPR) proteins (Prasad 2010, Pubmed ID: 20856808) with potential to interact with Hsp90/Hsp70 as co-chaperones.
XLOC_025257	XLOC_025257	AT5G24010	Chr5:8113794-8116615	WT	18	OK	26.2098	10.6178	-1.30362	-4.91271	5e-05	0.000622834	AT5G24010.1	Protein kinase superfamily protein; FUNCTIONS IN: protein serine/threonine kinase activity, protein kinase activity, kinase activity, ATP binding; INVOLVED IN: protein amino acid phosphorylation; LOCATED IN: plasma membrane; EXPRESSED IN: 23 plant structures; EXPRESSED DURING: 13 growth stages; CONTAINS InterPro DOMAIN/s: Protein kinase, ATP binding site (InterPro:IPR017441), Protein kinase, cata…
XLOC_012875	XLOC_012875	AT2G43870	Chr2:18166614-18168264	WT	18	OK	6.37321	2.58162	-1.30374	-3.2309	5e-05	0.000622834	AT2G43870.1	Pectin lyase-like superfamily protein; FUNCTIONS IN: polygalacturonase activity; INVOLVED IN: carbohydrate metabolic process; LOCATED IN: endomembrane system; EXPRESSED IN: sepal, male gametophyte, stamen; EXPRESSED DURING: 4 anthesis; CONTAINS InterPro DOMAIN/s: Pectin lyase fold/virulence factor (InterPro:IPR011050), Pectin lyase fold (InterPro:IPR012334), Glycoside hydrolase, family 28 (InterP…
XLOC_002660	XLOC_002660	AT1G54890	Chr1:20463082-20464470	WT	18	OK	219.031	88.6022	-1.30572	-5.30423	5e-05	0.000622834	AT1G54890.1	Late embryogenesis abundant (LEA) protein-related; FUNCTIONS IN: molecular_function unknown; INVOLVED IN: biological_process unknown; LOCATED IN: endomembrane system; EXPRESSED IN: 7 plant structures; EXPRESSED DURING: 4 anthesis, petal differentiation and expansion stage; CONTAINS InterPro DOMAIN/s: Root cap (InterPro:IPR009646); BEST Arabidopsis thaliana protein match is: Late embryogenesis abu…
XLOC_020829	XLOC_020829	AT4G22212	Chr4:11753985-11754688	WT	18	OK	57.1889	23.1335	-1.30575	-5.47489	5e-05	0.000622834	AT4G22212.1	Encodes a defensin-like (DEFL) family protein.
XLOC_007138	XLOC_007138	AT1G66783	Chr1:24911941-24913542	WT	18	OK	2.21854	0.897269	-1.306	-1.69214	0.00975	0.0494807	AT1G66783.1	Encodes a microRNA that targets several SPL family members, including SPL3,4, and 5. By regulating the expression of SPL3 (and probably also SPL4 and SPL5), this microRNA regulates vegetative phase change. MicroRNAs are regulatory RNAs with a mature length of ~21-nucleotides that are processed from hairpin precursors by Dicer-like enzymes. MicroRNAs can negatively regulate gene expression by atte…
XLOC_015685	XLOC_015685	AT3G54000	Chr3:19996568-19998680	WT	18	OK	38.7059	15.652	-1.30621	-4.24348	5e-05	0.000622834	AT3G54000.1	CONTAINS InterPro DOMAIN/s: Uncharacterised conserved protein UCP022260 (InterPro:IPR016802); Has 94 Blast hits to 94 proteins in 14 species: Archae - 0; Bacteria - 0; Metazoa - 0; Fungi - 0; Plants - 94; Viruses - 0; Other Eukaryotes - 0 (source: NCBI BLink).
XLOC_013895	XLOC_013895	AT3G17120	Chr3:5841095-5843485	WT	18	OK	22.2327	8.96454	-1.31038	-4.08939	5e-05	0.000622834	AT3G17120.1	unknown protein; BEST Arabidopsis thaliana protein match is: unknown protein (TAIR:AT1G02380.1); Has 67 Blast hits to 67 proteins in 11 species: Archae - 0; Bacteria - 0; Metazoa - 0; Fungi - 0; Plants - 67; Viruses - 0; Other Eukaryotes - 0 (source: NCBI BLink).
XLOC_018301	XLOC_018301	AT3G44940	Chr3:16413333-16415266	WT	18	OK	11.5197	4.64188	-1.31133	-3.96196	5e-05	0.000622834	AT3G44940.1	Protein of unknown function (DUF1635); CONTAINS InterPro DOMAIN/s: Protein of unknown function DUF1635 (InterPro:IPR012862); BEST Arabidopsis thaliana protein match is: Protein of unknown function (DUF1635) (TAIR:AT5G22930.1); Has 118 Blast hits to 118 proteins in 26 species: Archae - 0; Bacteria - 2; Metazoa - 4; Fungi - 0; Plants - 100; Viruses - 0; Other Eukaryotes - 12 (source: NCBI BLink).
XLOC_021054	XLOC_021054	AT4G26510,AT4G26520	Chr4:13383870-13390374	WT	18	OK	7.05459	2.84263	-1.31133	-3.57056	5e-05	0.000622834	AT4G26510.1	One of the homologous genes predicted to encode proteins with UPRT domains (Uracil phosphoribosyltransferase). Five of these genes (At5g40870, At3g27190, At1g55810, At4g26510 and At3g27440) show a high level of identity, and are annotated as also containing a N-terminal uracil kinase (UK) domain. These genes are referred to as UKL1 (UK-like 1), UKL2, UKL3, UKL4 and UKL5, respectively.
XLOC_028903	XLOC_028903	AT5G25610	Chr5:8914232-8916800	WT	18	OK	2.8952	1.1662	-1.31185	-2.64972	0.00025	0.00258687	AT5G25610.1	responsive to dehydration 22 (RD22) mediated by ABA
XLOC_031178	XLOC_031178	AT5G67620	Chr5:26964554-26966151	WT	18	OK	9.19943	3.70458	-1.31223	-2.76621	5e-05	0.000622834	AT5G67620.1	unknown protein; FUNCTIONS IN: molecular_function unknown; INVOLVED IN: N-terminal protein myristoylation; LOCATED IN: microtubule; BEST Arabidopsis thaliana protein match is: unknown protein (TAIR:AT5G62900.1); Has 1807 Blast hits to 1807 proteins in 277 species: Archae - 0; Bacteria - 0; Metazoa - 736; Fungi - 347; Plants - 385; Viruses - 0; Other Eukaryotes - 339 (source: NCBI BLink).
XLOC_020280	XLOC_020280	AT4G12720	Chr4:7487258-7490119	WT	18	OK	227.88	91.7089	-1.31314	-4.11775	5e-05	0.000622834	AT4G12720.4	Encodes a protein with ADP-ribose hydrolase activity. Negatively regulates EDS1-conditioned plant defense and programmed cell death.
XLOC_030632	XLOC_030632	AT5G56980	Chr5:23056079-23057742	WT	18	OK	106.291	42.7094	-1.3154	-5.09387	5e-05	0.000622834	AT5G56980.1	unknown protein; FUNCTIONS IN: molecular_function unknown; INVOLVED IN: biological_process unknown; LOCATED IN: endomembrane system; EXPRESSED IN: 18 plant structures; EXPRESSED DURING: 12 growth stages; BEST Arabidopsis thaliana protein match is: unknown protein (TAIR:AT4G26130.1); Has 30201 Blast hits to 17322 proteins in 780 species: Archae - 12; Bacteria - 1396; Metazoa - 17338; Fungi - 3422;…
XLOC_009513	XLOC_009513	AT2G30040	Chr2:12821709-12823169	WT	18	OK	28.2211	11.3111	-1.31903	-4.7727	5e-05	0.000622834	AT2G30040.1	member of MEKK subfamily
XLOC_011870	XLOC_011870	AT2G25735	Chr2:10975059-10975759	WT	18	OK	78.8845	31.5532	-1.32196	-5.78554	5e-05	0.000622834	AT2G25735.1	unknown protein; Has 31 Blast hits to 31 proteins in 9 species: Archae - 0; Bacteria - 0; Metazoa - 0; Fungi - 0; Plants - 31; Viruses - 0; Other Eukaryotes - 0 (source: NCBI BLink).
XLOC_024829	XLOC_024829	AT5G14920	Chr5:4826478-4827980	WT	18	OK	19.539	7.80628	-1.32365	-3.95228	5e-05	0.000622834	AT5G14920.1	Gibberellin-regulated family protein; INVOLVED IN: response to gibberellin stimulus; LOCATED IN: endomembrane system; EXPRESSED IN: 22 plant structures; EXPRESSED DURING: 13 growth stages; CONTAINS InterPro DOMAIN/s: Gibberellin regulated protein (InterPro:IPR003854); BEST Arabidopsis thaliana protein match is: GAST1 protein homolog 3 (TAIR:AT4G09600.1); Has 178772 Blast hits to 67361 proteins in…
XLOC_020790	XLOC_020790	AT4G21590	Chr4:11480343-11482719	WT	18	OK	2.01947	0.805494	-1.32603	-1.72119	0.0033	0.0213417	AT4G21590.1	Encodes a putative endonuclease but no demonstrable endonuclease activity, either towards single stranded DNA or mismatches, has been seen in vitro. Activated by AGAMOUS in a cal-1, ap1-1 background. Expressed in the floral meristem and during stamen development.
XLOC_011856	XLOC_011856	AT2G25460	Chr2:10832574-10835894	WT	18	OK	53.5098	21.3399	-1.32625	-4.4042	5e-05	0.000622834	AT2G25460.1	CONTAINS InterPro DOMAIN/s: C2 calcium-dependent membrane targeting (InterPro:IPR000008); BEST Arabidopsis thaliana protein match is: unknown protein (TAIR:AT5G04860.1); Has 108 Blast hits to 69 proteins in 11 species: Archae - 0; Bacteria - 0; Metazoa - 0; Fungi - 0; Plants - 108; Viruses - 0; Other Eukaryotes - 0 (source: NCBI BLink).
XLOC_011636	XLOC_011636	AT2G21510	Chr2:9210617-9213128	WT	18	OK	4.1194	1.64199	-1.32698	-2.40567	5e-05	0.000622834	AT2G21510.1	DNAJ heat shock N-terminal domain-containing protein; FUNCTIONS IN: unfolded protein binding, heat shock protein binding; INVOLVED IN: protein folding; LOCATED IN: cellular_component unknown; EXPRESSED IN: 8 plant structures; EXPRESSED DURING: 4 anthesis, petal differentiation and expansion stage; CONTAINS InterPro DOMAIN/s: Molecular chaperone, heat shock protein, Hsp40, DnaJ (InterPro:IPR015609…
XLOC_023540	XLOC_023540	AT4G28290	Chr4:14010684-14012583	WT	18	OK	6.72081	2.67863	-1.32714	-1.74668	0.00735	0.0399478	AT4G28290.1	unknown protein; FUNCTIONS IN: molecular_function unknown; INVOLVED IN: biological_process unknown; LOCATED IN: chloroplast; EXPRESSED IN: 23 plant structures; EXPRESSED DURING: 15 growth stages; Has 45 Blast hits to 45 proteins in 11 species: Archae - 0; Bacteria - 0; Metazoa - 0; Fungi - 0; Plants - 45; Viruses - 0; Other Eukaryotes - 0 (source: NCBI BLink).
XLOC_015388	XLOC_015388	AT3G48350	Chr3:17905724-17907561	WT	18	OK	5.4053	2.15082	-1.32949	-3.05746	5e-05	0.000622834	AT3G48350.1	Cysteine proteinases superfamily protein; FUNCTIONS IN: cysteine-type endopeptidase activity, cysteine-type peptidase activity; INVOLVED IN: proteolysis; LOCATED IN: endomembrane system; EXPRESSED IN: 17 plant structures; EXPRESSED DURING: 13 growth stages; CONTAINS InterPro DOMAIN/s: Peptidase C1A, papain (InterPro:IPR013128), Proteinase inhibitor I29, cathepsin propeptide (InterPro:IPR013201), …
XLOC_025109	XLOC_025109	AT5G20250	Chr5:6833658-6836782	WT	18	OK	271.541	108.037	-1.32965	-3.88979	5e-05	0.000622834	AT5G20250.4	encodes a member of glycosyl hydrolase family 36. Expression is induced within 3 hours of dark treatment, in senescing leaves and treatment with exogenous photosynthesis inhibitor. Induction of gene expression was suppressed in excised leaves supplied with sugar. The authors suggest that the gene's expression pattern is responding to the level of sugar in the cell.
XLOC_027771	XLOC_027771	AT5G02940	Chr5:682576-689702	WT	18	OK	1.1431	0.454605	-1.33027	-2.09708	0.0011	0.00879749	AT5G02940.1	Protein of unknown function (DUF1012); LOCATED IN: chloroplast, chloroplast envelope; EXPRESSED IN: 21 plant structures; EXPRESSED DURING: 13 growth stages; CONTAINS InterPro DOMAIN/s: Protein of unknown function DUF1012 (InterPro:IPR010420); BEST Arabidopsis thaliana protein match is: Protein of unknown function (DUF1012) (TAIR:AT5G43745.1); Has 374 Blast hits to 371 proteins in 64 species: Arch…
XLOC_000868	XLOC_000868	AT1G17840	Chr1:6142563-6148940	WT	18	OK	2.20046	0.874081	-1.33197	-2.41615	0.0005	0.00460825	AT1G17840.1	Encodes a plasma membrane-localized ATP-binding cassette transporter, that is required for cutin transport to the extracellular matrix.
XLOC_018913	XLOC_018913	AT3G55840	Chr3:20713708-20719116	WT	18	OK	40.6807	16.1353	-1.33413	-2.72594	5e-05	0.000622834	AT3G55840.1	Hs1pro-1 protein; CONTAINS InterPro DOMAIN/s: Hs1pro-1, C-terminal (InterPro:IPR009743), Hs1pro-1, N-terminal (InterPro:IPR009869); BEST Arabidopsis thaliana protein match is: ortholog of sugar beet HS1 PRO-1 2 (TAIR:AT2G40000.1); Has 60 Blast hits to 60 proteins in 17 species: Archae - 0; Bacteria - 0; Metazoa - 0; Fungi - 0; Plants - 60; Viruses - 0; Other Eukaryotes - 0 (source: NCBI BLink).
XLOC_016662	XLOC_016662	AT3G10290	Chr3:3183402-3185348	WT	18	OK	2.73996	1.08669	-1.33421	-2.66123	0.0027	0.0181438	AT3G10290.1	Nucleotide-sugar transporter family protein; CONTAINS InterPro DOMAIN/s: Protein of unknown function DUF250 (InterPro:IPR004853); BEST Arabidopsis thaliana protein match is: Nucleotide-sugar transporter family protein (TAIR:AT5G04160.1); Has 2900 Blast hits to 2898 proteins in 294 species: Archae - 4; Bacteria - 137; Metazoa - 666; Fungi - 435; Plants - 1330; Viruses - 0; Other Eukaryotes - 328 (…
XLOC_004598	XLOC_004598	AT1G12090	Chr1:4089846-4090725	WT	18	OK	9.57647	3.79231	-1.33642	-3.71473	5e-05	0.000622834	AT1G12090.1	extensin-like protein (ELP)
XLOC_010241	XLOC_010241	AT2G43510	Chr2:18067171-18067802	WT	18	OK	53.8952	21.2706	-1.3413	-5.58522	5e-05	0.000622834	AT2G43510.1	Member of the defensin-like (DEFL) family. Encodes putative trypsin inhibitor protein which may function in defense against herbivory.
XLOC_016399	XLOC_016399	AT3G05320	Chr3:1513328-1515941	WT	18	OK	30.802	12.1238	-1.34518	-3.95227	5e-05	0.000622834	AT3G05320.1	O-fucosyltransferase family protein; CONTAINS InterPro DOMAIN/s: GDP-fucose protein O-fucosyltransferase (InterPro:IPR019378); Has 30201 Blast hits to 17322 proteins in 780 species: Archae - 12; Bacteria - 1396; Metazoa - 17338; Fungi - 3422; Plants - 5037; Viruses - 0; Other Eukaryotes - 2996 (source: NCBI BLink).
XLOC_008030	XLOC_008030	AT2G03830	Chr2:1171135-1172363	WT	18	OK	3.55956	1.40047	-1.34578	-2.42743	0.00545	0.031704	AT2G03830.1	Encodes a root meristem growth factor (RGF). Belongs to a family of functionally redundant homologous peptides that are secreted, tyrosine-sulfated, and expressed mainly in the stem cell area and the innermost layer of central columella cells. RGFs are required for maintenance of the root stem cell niche and transit amplifying cell proliferation. Members of this family include: At5g60810 (RGF1), …
XLOC_026481	XLOC_026481	AT5G45110	Chr5:18228909-18231522	WT	18	OK	268.811	105.662	-1.34714	-4.34938	5e-05	0.000622834	AT5G45110.1	Encodes a paralog of NPR1. Involved in negative regulation of defense responses against bacterial and oomycete pathogens. npr3 mutants has elevated level of PR1 expression. Interacts with TGA2, TGA3, TGA5 and TGA6 in yeast two hybrid assays.
XLOC_027145	XLOC_027145	AT5G57010	Chr5:23067555-23070453	WT	18	OK	28.3566	11.1447	-1.34732	-4.23209	5e-05	0.000622834	AT5G57010.1	calmodulin-binding family protein; CONTAINS InterPro DOMAIN/s: IQ calmodulin-binding region (InterPro:IPR000048); BEST Arabidopsis thaliana protein match is: calmodulin-binding family protein (TAIR:AT4G33050.3); Has 390 Blast hits to 271 proteins in 57 species: Archae - 0; Bacteria - 20; Metazoa - 0; Fungi - 100; Plants - 264; Viruses - 0; Other Eukaryotes - 6 (source: NCBI BLink).
XLOC_021107	XLOC_021107	AT4G27654	Chr4:13811644-13812126	WT	18	OK	224.064	87.9531	-1.34911	-7.33289	5e-05	0.000622834	AT4G27654.1	unknown protein; FUNCTIONS IN: molecular_function unknown; INVOLVED IN: biological_process unknown; LOCATED IN: endomembrane system; EXPRESSED IN: 17 plant structures; EXPRESSED DURING: 9 growth stages; Has 30201 Blast hits to 17322 proteins in 780 species: Archae - 12; Bacteria - 1396; Metazoa - 17338; Fungi - 3422; Plants - 5037; Viruses - 0; Other Eukaryotes - 2996 (source: NCBI BLink).
XLOC_014396	XLOC_014396	AT3G25700	Chr3:9358718-9360463	WT	18	OK	1.70532	0.668982	-1.35	-1.98322	0.0027	0.0181438	AT3G25700.1	Eukaryotic aspartyl protease family protein; FUNCTIONS IN: aspartic-type endopeptidase activity; INVOLVED IN: proteolysis; CONTAINS InterPro DOMAIN/s: Peptidase aspartic (InterPro:IPR021109), Peptidase aspartic, catalytic (InterPro:IPR009007), Peptidase A1 (InterPro:IPR001461); BEST Arabidopsis thaliana protein match is: Eukaryotic aspartyl protease family protein (TAIR:AT2G42980.1); Has 2947 Bla…
XLOC_007762	XLOC_007762	AT1G78940	Chr1:29680821-29684161	WT	18	OK	2.19287	0.859784	-1.35078	-2.51412	5e-05	0.000622834	AT1G78940.2	Protein kinase protein with adenine nucleotide alpha hydrolases-like domain; FUNCTIONS IN: kinase activity; INVOLVED IN: protein amino acid phosphorylation, response to stress; EXPRESSED IN: 12 plant structures; EXPRESSED DURING: 8 growth stages; CONTAINS InterPro DOMAIN/s: UspA (InterPro:IPR006016), Serine/threonine-protein kinase domain (InterPro:IPR002290), Serine-threonine/tyrosine-protein ki…
XLOC_021430	XLOC_021430	AT4G33920,AT4G33925	Chr4:16260522-16265420	WT	18	OK	289.753	113.524	-1.35183	-4.67901	5e-05	0.000622834	AT4G33920.1	Protein phosphatase 2C family protein; FUNCTIONS IN: protein serine/threonine phosphatase activity, catalytic activity; INVOLVED IN: protein amino acid dephosphorylation; LOCATED IN: mitochondrion, protein serine/threonine phosphatase complex; EXPRESSED IN: 23 plant structures; EXPRESSED DURING: 13 growth stages; CONTAINS InterPro DOMAIN/s: Protein phosphatase 2C, manganese/magnesium aspartate bi…
XLOC_007027	XLOC_007027	AT1G64760	Chr1:24054142-24056414	WT	18	OK	23.0312	9.01095	-1.35384	-4.3247	5e-05	0.000622834	AT1G64760.1	O-Glycosyl hydrolases family 17 protein; FUNCTIONS IN: cation binding, hydrolase activity, hydrolyzing O-glycosyl compounds, catalytic activity; INVOLVED IN: carbohydrate metabolic process; LOCATED IN: anchored to plasma membrane, plasma membrane, anchored to membrane; EXPRESSED IN: guard cell, cultured cell; CONTAINS InterPro DOMAIN/s: X8 (InterPro:IPR012946), Glycoside hydrolase, catalytic core…
XLOC_005128	XLOC_005128	AT1G22470	Chr1:7931787-7933571	WT	18	OK	61.0571	23.8766	-1.35456	-3.85463	5e-05	0.000622834	AT1G22470.1	unknown protein; BEST Arabidopsis thaliana protein match is: unknown protein (TAIR:AT1G72240.1); Has 1693 Blast hits to 236 proteins in 54 species: Archae - 0; Bacteria - 8; Metazoa - 451; Fungi - 116; Plants - 94; Viruses - 2; Other Eukaryotes - 1022 (source: NCBI BLink).
XLOC_012766	XLOC_012766	AT2G41890	Chr2:17474589-17481139	WT	18	OK	27.5041	10.7515	-1.35511	-3.65879	5e-05	0.000622834	AT2G41890.1	curculin-like (mannose-binding) lectin family protein / PAN domain-containing protein; FUNCTIONS IN: sugar binding, protein kinase activity, ATP binding; INVOLVED IN: protein amino acid phosphorylation, recognition of pollen; LOCATED IN: endomembrane system; EXPRESSED IN: 22 plant structures; EXPRESSED DURING: 13 growth stages; CONTAINS InterPro DOMAIN/s: Curculin-like (mannose-binding) lectin (I…
XLOC_003775	XLOC_003775	AT1G76410	Chr1:28668847-28669646	WT	18	OK	5.12899	2.00481	-1.35521	-2.9255	0.00035	0.00345062	AT1G76410.1	ATL8; FUNCTIONS IN: zinc ion binding; EXPRESSED IN: 22 plant structures; EXPRESSED DURING: 13 growth stages; CONTAINS InterPro DOMAIN/s: Zinc finger, RING-type (InterPro:IPR001841), Zinc finger, C3HC4 RING-type (InterPro:IPR018957); BEST Arabidopsis thaliana protein match is: RING/U-box superfamily protein (TAIR:AT1G20823.1); Has 9001 Blast hits to 8977 proteins in 267 species: Archae - 0; Bacter…
XLOC_029783	XLOC_029783	AT5G41460	Chr5:16589597-16592241	WT	18	OK	2.19325	0.856177	-1.35709	-2.58	0.0005	0.00460825	AT5G41460.1	Protein of unknown function (DUF604); CONTAINS InterPro DOMAIN/s: Protein of unknown function DUF604 (InterPro:IPR006740); BEST Arabidopsis thaliana protein match is: Protein of unknown function (DUF604) (TAIR:AT4G23490.1); Has 1807 Blast hits to 1807 proteins in 277 species: Archae - 0; Bacteria - 0; Metazoa - 736; Fungi - 347; Plants - 385; Viruses - 0; Other Eukaryotes - 339 (source: NCBI BLin…
XLOC_028588	XLOC_028588	AT5G19110	Chr5:6411560-6413170	WT	18	OK	34.9935	13.6565	-1.3575	-4.991	5e-05	0.000622834	AT5G19110.1	Eukaryotic aspartyl protease family protein; FUNCTIONS IN: aspartic-type endopeptidase activity; INVOLVED IN: proteolysis, N-terminal protein myristoylation; LOCATED IN: endomembrane system; EXPRESSED IN: shoot apex, leaf apex, hypocotyl, root, leaf; CONTAINS InterPro DOMAIN/s: Peptidase aspartic (InterPro:IPR021109), Peptidase aspartic, catalytic (InterPro:IPR009007), Peptidase A1 (InterPro:IPR0…
XLOC_030445	XLOC_030445	AT5G53290	Chr5:21617812-21619267	WT	18	OK	13.8557	5.39527	-1.36071	-4.30446	5e-05	0.000622834	AT5G53290.1	encodes a member of the ERF (ethylene response factor) subfamily B-5 of ERF/AP2 transcription factor family. The protein contains one AP2 domain. There are 7 members in this subfamily.
XLOC_019439	XLOC_019439	AT4G01440	Chr4:596398-598718	WT	18	OK	12.8976	4.99679	-1.36803	-4.33311	5e-05	0.000622834	AT4G01440.1	nodulin MtN21-like transporter family protein
XLOC_024675	XLOC_024675	AT5G11160	Chr5:3550519-3552207	WT	18	OK	2.48423	0.962179	-1.36842	-2.36084	0.0028	0.0186585	AT5G11160.1	adenine phosphoribosyltransferase 5 (APT5); FUNCTIONS IN: adenine phosphoribosyltransferase activity; INVOLVED IN: nucleoside metabolic process, adenine salvage, anaerobic respiration, nucleotide metabolic process; LOCATED IN: cytoplasm; EXPRESSED IN: 23 plant structures; EXPRESSED DURING: 13 growth stages; CONTAINS InterPro DOMAIN/s: Adenine phosphoribosyl transferase (InterPro:IPR005764), Phosp…
[truncated: 340 more rows]

## Sheet: WT_vs_med20
Differentially expressed gene list comparing WT with med20 RNAseq samples
test_id	gene_id	gene	locus	sample_1	sample_2	status	value_1	value_2	log2(fold_change)	test_stat	p_value	q_value	gene model	description
[truncated: 1,818 more rows]
