# Supplementary material for: MEDIATOR18 and MEDIATOR20 confer susceptibility to Fusarium oxysporum in Arabidopsis thaliana
Source: PLoS One. 2017 Apr 25;12(4):e0176022. doi: 10.1371/journal.pone.0176022 (PMC5404846; doi:10.1371/journal.pone.0176022)
Supplement: S3 Table — (XLSX) [file pone.0176022.s005.xlsx]

## Sheet: upwtvs18
GO terms derived from genes significantly induced in Col-0 versus med18
GO_acc	term_type	Term	queryitem	querytotal	bgitem	bgtotal	pvalue	FDR	entries
GO:0030312	C	external encapsulating structure	40	698	407	37767	1.6e-16	2.1e-14	// AT2G02100 // AT5G05340 // AT3G49120 // AT5G06870 // AT1G01300 // AT2G28950 // AT2G34930 // AT1G02810 // AT2G05920 // AT2G44450 // AT4G16563 // AT5G57560 // AT3G45970 // AT1G26770 // AT5G23870 // AT3G08030 // AT4G38770 // AT3G16240 // AT1G35140 // AT5G64260 // AT5G18470 // AT2G38540 // AT5G59320 // AT3G55430 // AT4G37800 // AT5G07030 // AT3G16530 // AT2G41800 // AT3G45960 // AT4G16260 // AT2G38…
GO:0005618	C	cell wall	40	698	403	37767	1.2e-16	2.1e-14	// AT2G02100 // AT5G05340 // AT3G49120 // AT5G06870 // AT1G01300 // AT2G28950 // AT2G34930 // AT1G02810 // AT2G05920 // AT2G44450 // AT4G16563 // AT5G57560 // AT3G45970 // AT1G26770 // AT5G23870 // AT3G08030 // AT4G38770 // AT3G16240 // AT1G35140 // AT5G64260 // AT5G18470 // AT2G38540 // AT5G59320 // AT3G55430 // AT4G37800 // AT5G07030 // AT3G16530 // AT2G41800 // AT3G45960 // AT4G16260 // AT2G38…
GO:0050896	P	response to stimulus	149	698	4057	37767	7.3e-16	9.8e-13	// AT1G58290 // AT3G50060 // AT5G07010 // AT5G06870 // AT4G14690 // AT5G15230 // AT2G34930 // AT4G38410 // AT3G44320 // AT2G28210 // AT1G44970 // AT1G65390 // AT2G20142 // AT1G69040 // AT1G23030 // AT1G05800 // AT5G64900 // AT1G12610 // AT1G19610 // AT4G35480 // AT4G25480 // AT1G80730 // AT5G53750 // AT1G19050 // AT2G34060 // AT2G21490 // AT1G19180 // AT3G09260 // AT4G34760 // AT5G17700 // AT5G25…
GO:0042221	P	response to chemical stimulus	95	698	2085	37767	2.5e-15	1.7e-12	// AT2G38750 // AT3G50060 // AT5G07010 // AT5G15230 // AT4G38410 // AT1G44970 // AT1G69040 // AT1G23030 // AT1G66160 // AT5G64900 // AT4G12720 // AT4G25480 // AT1G19050 // AT2G34060 // AT2G21490 // AT1G19180 // AT4G34760 // AT5G17700 // AT5G25610 // AT5G54380 // AT2G28210 // AT4G18010 // AT4G35480 // AT1G20450 // AT1G62480 // AT5G14920 // AT1G20340 // AT5G49520 // AT2G46510 // AT4G34990 // AT1G01…
GO:0010033	P	response to organic substance	72	698	1342	37767	4.7e-15	2.1e-12	// AT2G38750 // AT3G50060 // AT5G07010 // AT2G35930 // AT3G50970 // AT1G32640 // AT3G61890 // AT3G16350 // AT2G34810 // AT4G38620 // AT1G70700 // AT5G42650 // AT2G44840 // AT3G45640 // AT5G44030 // AT5G57560 // AT1G69040 // AT1G23030 // AT2G46510 // AT5G24780 // AT5G64900 // AT5G60890 // AT4G01540 // AT4G37760 // AT4G34410 // AT4G27410 // AT4G15975 // AT3G48100 // AT5G37770 // AT1G19050 // AT5G49…
GO:0009505	C	plant-type cell wall	29	698	254	37767	7.8e-14	6.8e-12	// AT2G02100 // AT3G49120 // AT5G06870 // AT1G01300 // AT2G28950 // AT1G02810 // AT2G05920 // AT2G44450 // AT4G16563 // AT3G45970 // AT1G26770 // AT5G23870 // AT3G16240 // AT1G35140 // AT5G64260 // AT5G18470 // AT2G38540 // AT3G16530 // AT2G41800 // AT3G45960 // AT2G38380 // AT1G53840 // AT3G15720 // AT4G08950 // AT4G13340 // AT5G07030 // AT1G68560 // AT1G71380 // AT2G47550
GO:0009719	P	response to endogenous stimulus	61	698	1068	37767	5.1e-14	1.7e-11	// AT2G38750 // AT3G50060 // AT5G07010 // AT3G50970 // AT1G32640 // AT3G61890 // AT3G16350 // AT2G34810 // AT4G38620 // AT1G70700 // AT5G42650 // AT2G44840 // AT3G45640 // AT5G44030 // AT5G57560 // AT1G69040 // AT2G46510 // AT5G24780 // AT5G64900 // AT5G60890 // AT4G01540 // AT4G37760 // AT4G27410 // AT3G48100 // AT5G37770 // AT1G19050 // AT1G17380 // AT4G34990 // AT1G19180 // AT1G76930 // AT1G17…
GO:0016798	F	hydrolase activity, acting on glycosyl bonds	41	698	526	37767	9.3e-14	4.7e-11	// AT4G03210 // AT3G06770 // AT1G64760 // AT3G44990 // AT2G43870 // AT5G25980 // AT5G48070 // AT1G10550 // AT5G57560 // AT3G61490 // AT5G04360 // AT1G66270 // AT5G58480 // AT2G43620 // AT2G44480 // AT4G14130 // AT5G28510 // AT3G09260 // AT2G44450 // AT1G70370 // AT5G34940 // AT1G02640 // AT3G52840 // AT3G15720 // AT3G55430 // AT4G37800 // AT5G26000 // AT4G17090 // AT1G26560 // AT3G62740 // AT5G20…
GO:0009753	P	response to jasmonic acid stimulus	25	698	215	37767	2.8e-12	7.6e-10	// AT3G50060 // AT5G07010 // AT1G32640 // AT3G16350 // AT4G38620 // AT1G70700 // AT5G42650 // AT2G34810 // AT5G24780 // AT5G64900 // AT5G60890 // AT4G37760 // AT1G17380 // AT1G19180 // AT1G76930 // AT5G24770 // AT3G47600 // AT5G44030 // AT5G13220 // AT2G34600 // AT4G18780 // AT5G09980 // AT4G34990 // AT4G34710 // AT4G37260
GO:0004553	F	hydrolase activity, hydrolyzing O-glycosyl compounds	34	698	476	37767	1.1e-10	2.8e-08	// AT3G06770 // AT1G64760 // AT2G43870 // AT5G25980 // AT5G04360 // AT3G61490 // AT1G66270 // AT5G58480 // AT2G43620 // AT2G44480 // AT5G26000 // AT5G28510 // AT3G09260 // AT2G44450 // AT1G70370 // AT5G34940 // AT1G02640 // AT3G52840 // AT3G15720 // AT3G55430 // AT4G37800 // AT4G17090 // AT1G26560 // AT3G62740 // AT5G20250 // AT5G63810 // AT1G67830 // AT4G16260 // AT5G36890 // AT5G18670 // AT3G16…
GO:0006950	P	response to stress	89	698	2320	37767	1.6e-10	3.6e-08	// AT2G38750 // AT3G50060 // AT5G06870 // AT2G34930 // AT4G38410 // AT3G44320 // AT1G44970 // AT1G65390 // AT2G20142 // AT1G70830 // AT1G05800 // AT5G64900 // AT1G12610 // AT1G66270 // AT4G25480 // AT5G53750 // AT2G34060 // AT2G21490 // AT1G19180 // AT5G25610 // AT3G47860 // AT2G43510 // AT4G25470 // AT3G26460 // AT1G20450 // AT1G62480 // AT1G01470 // AT2G46510 // AT4G34990 // AT1G72520 // AT4G37…
GO:0003824	F	catalytic activity	252	698	9638	37767	6e-10	1e-07	// AT1G58290 // AT3G61580 // AT2G41890 // AT1G01300 // AT4G03210 // AT5G19100 // AT1G02810 // AT5G20260 // AT3G44320 // AT4G01950 // AT5G07010 // AT3G57020 // AT3G16370 // AT5G63810 // AT3G56000 // AT3G61750 // AT1G44970 // AT5G62360 // AT1G12990 // AT3G63440 // AT3G59350 // AT2G17650 // AT1G76790 // AT1G23030 // AT1G05800 // AT1G56670 // AT1G66270 // AT5G58480 // AT1G12900 // AT5G38280 // AT5G23…
GO:0009725	P	response to hormone stimulus	49	698	982	37767	1.3e-09	2.6e-07	// AT2G38750 // AT3G50060 // AT4G38620 // AT3G50970 // AT5G15230 // AT3G61890 // AT3G16350 // AT5G44030 // AT1G71930 // AT2G44840 // AT4G01540 // AT3G45640 // AT5G57560 // AT1G69040 // AT2G46510 // AT5G64900 // AT5G60890 // AT1G32640 // AT4G27410 // AT3G48100 // AT5G37770 // AT1G19050 // AT1G76930 // AT1G17345 // AT4G34760 // AT5G59320 // AT3G47600 // AT1G77690 // AT5G25610 // AT5G54380 // AT2G14…
GO:0010200	P	response to chitin	18	698	151	37767	2.2e-09	3.7e-07	// AT4G39070 // AT3G50060 // AT1G23030 // AT1G66160 // AT4G31800 // AT2G34600 // AT1G32640 // AT2G35930 // AT3G16530 // AT4G34410 // AT4G15975 // AT2G44840 // AT1G19050 // AT5G49520 // AT3G45640 // AT3G55980 // AT4G35480 // AT4G37260
GO:0010876	P	lipid localization	9	698	24	37767	5.3e-09	7.9e-07	// AT2G38530 // AT3G22120 // AT2G38540 // AT5G48485 // AT1G17840 // AT1G12090 // AT2G44300 // AT4G22610 // AT5G01870
GO:0009628	P	response to abiotic stimulus	61	698	1471	37767	1.1e-08	1.5e-06	// AT2G38750 // AT3G50060 // AT3G49120 // AT2G35930 // AT3G50970 // AT4G14690 // AT1G32640 // AT3G61890 // AT4G38410 // AT4G37260 // AT4G38620 // AT5G44110 // AT1G20340 // AT2G39800 // AT2G23290 // AT3G17390 // AT3G45640 // AT5G57560 // AT1G58290 // AT5G66570 // AT1G01470 // AT5G60890 // AT1G12610 // AT4G12720 // AT4G03280 // AT4G21870 // AT4G25480 // AT4G27410 // AT3G48100 // AT5G37770 // AT3G16…
GO:0004091	F	carboxylesterase activity	26	698	378	37767	3.5e-08	4.4e-06	// AT1G02810 // AT3G16370 // AT5G62350 // AT5G53370 // AT2G23610 // AT4G02330 // AT1G05800 // AT1G56670 // AT1G14890 // AT3G47380 // AT5G23870 // AT5G26670 // AT1G41830 // AT5G45670 // AT1G62770 // AT4G19420 // AT1G02660 // AT1G29660 // AT5G62360 // AT3G49330 // AT1G67830 // AT1G53840 // AT2G03980 // AT3G48460 // AT3G14310 // AT2G47550
GO:0031225	C	anchored to membrane	21	698	272	37767	1.2e-07	8e-06	// AT5G10430 // AT4G27520 // AT1G64760 // AT1G55330 // AT5G58480 // AT1G21090 // AT3G15720 // AT4G26320 // AT3G61640 // AT5G15350 // AT5G49280 // AT1G29980 // AT5G55730 // AT2G44300 // AT5G11740 // AT5G65390 // AT3G43960 // AT4G16140 // AT3G06750 // AT2G34510 // AT3G16860
GO:0009737	P	response to abscisic acid stimulus	25	698	378	37767	1.3e-07	1.6e-05	// AT2G38750 // AT3G50060 // AT4G38620 // AT3G50970 // AT1G32640 // AT3G61890 // AT1G71930 // AT2G39800 // AT3G45640 // AT5G60890 // AT4G27410 // AT5G37770 // AT1G76930 // AT5G59320 // AT3G47600 // AT5G25610 // AT4G18010 // AT3G59220 // AT1G20450 // AT4G34240 // AT2G46510 // AT4G34990 // AT4G34710 // AT3G22060 // AT4G37260
GO:0009611	P	response to wounding	17	698	197	37767	4.6e-07	5.1e-05	// AT1G05800 // AT1G32640 // AT5G24770 // AT1G01470 // AT5G64900 // AT2G34810 // AT4G37760 // AT5G63770 // AT5G42650 // AT2G46510 // AT5G13220 // AT4G34710 // AT3G45640 // AT5G53750 // AT1G74930 // AT1G76930 // AT1G72520
GO:0006970	P	response to osmotic stress	25	698	408	37767	4.9e-07	5.1e-05	// AT2G38750 // AT3G50060 // AT4G38620 // AT4G12720 // AT3G61890 // AT3G16350 // AT2G39800 // AT2G23290 // AT3G45640 // AT5G60890 // AT1G12610 // AT4G23670 // AT5G24770 // AT3G47600 // AT5G25610 // AT1G13930 // AT2G16500 // AT4G16260 // AT2G38380 // AT1G62480 // AT4G18780 // AT4G34990 // AT4G34710 // AT4G30650 // AT4G37260
GO:0016787	F	hydrolase activity	104	698	3468	37767	1e-06	0.0001	// AT1G01300 // AT4G03210 // AT5G19100 // AT1G02810 // AT3G44320 // AT3G16370 // AT5G63810 // AT3G62740 // AT3G23810 // AT1G05800 // AT1G56670 // AT1G66270 // AT5G58480 // AT5G23870 // AT3G09260 // AT5G45670 // AT1G62770 // AT5G11650 // AT5G20250 // AT1G02660 // AT5G62360 // AT3G49330 // AT4G33920 // AT4G30280 // AT1G18370 // AT1G17840 // AT5G63140 // AT3G14310 // AT2G22990 // AT3G06770 // AT2G05…
GO:0009605	P	response to external stimulus	25	698	429	37767	1.2e-06	0.00011	// AT1G32640 // AT3G44320 // AT5G46330 // AT3G45640 // AT5G57560 // AT1G05800 // AT5G64900 // AT5G60890 // AT1G66270 // AT4G37760 // AT1G74930 // AT5G37770 // AT5G53750 // AT1G76930 // AT3G45780 // AT5G24770 // AT5G13220 // AT1G01470 // AT5G42650 // AT2G34810 // AT3G15540 // AT2G46510 // AT4G34710 // AT5G63770 // AT1G72520
GO:0009743	P	response to carbohydrate stimulus	18	698	240	37767	1.4e-06	0.00013	// AT4G39070 // AT3G50060 // AT1G23030 // AT1G66160 // AT4G31800 // AT2G34600 // AT1G32640 // AT2G35930 // AT3G16530 // AT4G34410 // AT4G15975 // AT2G44840 // AT1G19050 // AT5G49520 // AT3G45640 // AT3G55980 // AT4G35480 // AT4G37260
GO:0016757	F	transferase activity, transferring glycosyl groups	28	698	544	37767	2.7e-06	0.00023	// AT4G03210 // AT4G02130 // AT3G44990 // AT5G44030 // AT4G26510 // AT3G21560 // AT3G56000 // AT5G57560 // AT1G12990 // AT3G18660 // AT5G03770 // AT2G16890 // AT5G41460 // AT1G09350 // AT5G11160 // AT3G50760 // AT3G62720 // AT3G43190 // AT1G78280 // AT3G27540 // AT4G37800 // AT3G28180 // AT2G35710 // AT1G70090 // AT4G18780 // AT1G07260 // AT3G53900 // AT5G17420
GO:0009651	P	response to salt stress	22	698	366	37767	3.2e-06	0.00027	// AT3G50060 // AT4G38620 // AT4G12720 // AT3G61890 // AT3G16350 // AT2G39800 // AT2G23290 // AT5G60890 // AT1G12610 // AT4G23670 // AT5G24770 // AT3G47600 // AT5G25610 // AT1G13930 // AT2G16500 // AT4G16260 // AT2G38380 // AT1G62480 // AT4G34990 // AT4G34710 // AT4G30650 // AT4G37260
GO:0005975	P	carbohydrate metabolic process	37	698	866	37767	4.8e-06	0.00038	// AT3G18660 // AT1G62540 // AT3G06770 // AT1G64760 // AT3G44320 // AT5G44030 // AT2G43870 // AT5G25980 // AT3G55430 // AT1G12990 // AT1G12140 // AT3G61490 // AT3G01260 // AT5G60890 // AT4G02130 // AT5G58480 // AT1G12900 // AT5G10100 // AT5G26000 // AT4G39770 // AT1G09350 // AT3G50760 // AT3G62720 // AT3G43190 // AT4G37800 // AT4G17090 // AT5G41080 // AT3G27540 // AT5G04360 // AT4G18010 // AT2G35…
GO:0009664	P	plant-type cell wall organization	10	698	79	37767	5.1e-06	0.00038	// AT4G17030 // AT3G45970 // AT3G45960 // AT2G28950 // AT4G38400 // AT1G26770 // AT5G17420 // AT1G10550 // AT5G57560 // AT3G15370
GO:0030599	F	pectinesterase activity	13	698	144	37767	6.4e-06	0.00046	// AT1G41830 // AT1G14890 // AT1G53840 // AT1G02810 // AT1G62770 // AT3G49330 // AT5G62350 // AT3G47380 // AT5G53370 // AT5G62360 // AT3G14310 // AT4G02330 // AT2G47550
GO:0044262	P	cellular carbohydrate metabolic process	23	698	417	37767	7.3e-06	0.00052	// AT1G62540 // AT3G44320 // AT5G44030 // AT5G25980 // AT1G12140 // AT1G12990 // AT5G60890 // AT3G18660 // AT1G12900 // AT3G01260 // AT5G10100 // AT5G26000 // AT4G39770 // AT3G62720 // AT3G43190 // AT4G37800 // AT4G17090 // AT5G41080 // AT3G27540 // AT5G04360 // AT4G18010 // AT4G18780 // AT5G17420
GO:0009827	P	plant-type cell wall modification	8	698	50	37767	9.7e-06	0.00065	// AT4G17030 // AT3G45970 // AT3G45960 // AT2G28950 // AT4G38400 // AT1G26770 // AT1G10550 // AT3G15370
GO:0016758	F	transferase activity, transferring hexosyl groups	20	698	340	37767	1.2e-05	0.00074	// AT3G27540 // AT4G03210 // AT3G43190 // AT2G35710 // AT1G70090 // AT3G50760 // AT4G18780 // AT1G12990 // AT1G07260 // AT3G44990 // AT4G37800 // AT3G21560 // AT3G56000 // AT2G16890 // AT5G44030 // AT5G57560 // AT4G02130 // AT3G28180 // AT5G17420 // AT1G09350
GO:0044464	C	cell part	336	698	15217	37767	1.9e-05	0.00085	// AT3G05470 // AT2G38750 // AT1G54890 // AT2G41890 // AT1G01300 // AT1G29930 // AT2G34930 // AT1G02810 // AT5G20260 // AT3G57020 // AT3G49330 // AT5G54400 // AT5G06870 // AT1G44970 // AT1G09575 // AT5G15350 // AT1G26770 // AT2G20142 // AT3G59350 // AT1G77380 // AT4G21680 // AT1G76790 // AT1G23030 // AT1G05800 // AT1G56670 // AT2G19780 // AT3G12110 // AT3G27210 // AT5G58480 // AT4G25480 // AT5G55…
GO:0005623	C	cell	336	698	15217	37767	1.9e-05	0.00085	// AT3G05470 // AT2G38750 // AT1G54890 // AT2G41890 // AT1G01300 // AT1G29930 // AT2G34930 // AT1G02810 // AT5G20260 // AT3G57020 // AT3G49330 // AT5G54400 // AT5G06870 // AT1G44970 // AT1G09575 // AT5G15350 // AT1G26770 // AT2G20142 // AT3G59350 // AT1G77380 // AT4G21680 // AT1G76790 // AT1G23030 // AT1G05800 // AT1G56670 // AT2G19780 // AT3G12110 // AT3G27210 // AT5G58480 // AT4G25480 // AT5G55…
GO:0009620	P	response to fungus	13	698	158	37767	1.6e-05	0.001	// AT2G37130 // AT3G49120 // AT1G05800 // AT2G43510 // AT4G31800 // AT5G42650 // AT2G34930 // AT4G18780 // AT5G44030 // AT5G38280 // AT5G45110 // AT3G25780 // AT3G09260
GO:0009415	P	response to water	16	698	240	37767	2.1e-05	0.0012	// AT1G20450 // AT2G35930 // AT3G50970 // AT1G32640 // AT3G61890 // AT4G38410 // AT1G01470 // AT4G18780 // AT4G25480 // AT4G27410 // AT4G34240 // AT2G39800 // AT2G21490 // AT5G59320 // AT5G25610 // AT4G25490
GO:0009828	P	plant-type cell wall loosening	7	698	40	37767	2.1e-05	0.0012	// AT4G17030 // AT3G45970 // AT3G45960 // AT2G28950 // AT4G38400 // AT1G26770 // AT3G15370
GO:0016051	P	carbohydrate biosynthetic process	17	698	277	37767	3.2e-05	0.0017	// AT3G62720 // AT1G62540 // AT2G35710 // AT1G70090 // AT5G60890 // AT3G50760 // AT4G18780 // AT3G43190 // AT5G44030 // AT4G17090 // AT5G10100 // AT5G04360 // AT1G12140 // AT4G39770 // AT4G02130 // AT5G17420 // AT1G09350
GO:0006952	P	defense response	32	698	766	37767	3.1e-05	0.0017	// AT2G02100 // AT3G49120 // AT5G06870 // AT2G26380 // AT4G12720 // AT2G34930 // AT5G46330 // AT5G44030 // AT5G42650 // AT1G65390 // AT2G20142 // AT1G70830 // AT1G05800 // AT5G24780 // AT4G22212 // AT5G64900 // AT5G60890 // AT1G19610 // AT1G71400 // AT5G15410 // AT5G37770 // AT4G23670 // AT1G19180 // AT5G24770 // AT5G45110 // AT4G18780 // AT3G26460 // AT2G37130 // AT2G43510 // AT4G31800 // AT2G35…
GO:0042545	P	cell wall modification	11	698	123	37767	3.6e-05	0.0018	// AT4G17030 // AT3G45970 // AT3G45960 // AT2G28950 // AT1G02810 // AT4G38400 // AT5G46330 // AT1G26770 // AT1G10550 // AT2G47550 // AT3G15370
GO:0009607	P	response to biotic stimulus	28	698	638	37767	4.3e-05	0.0021	// AT3G49120 // AT4G12720 // AT2G34930 // AT5G46330 // AT5G44030 // AT3G45640 // AT3G45680 // AT1G70830 // AT1G05800 // AT5G42650 // AT5G60890 // AT1G74930 // AT1G71880 // AT4G23670 // AT1G19180 // AT3G09260 // AT4G36000 // AT5G24770 // AT1G72140 // AT5G45110 // AT3G25780 // AT5G38280 // AT3G26460 // AT2G37130 // AT2G43510 // AT4G31800 // AT4G18780 // AT3G14310
GO:0009522	C	photosystem I	5	698	22	37767	0.00011	0.0042	// AT1G55670 // AT1G31330 // AT3G61470 // AT4G12800 // AT2G46820
GO:0046906	F	tetrapyrrole binding	11	698	136	37767	8.3e-05	0.0046	// AT5G05340 // AT1G29930 // AT4G14690 // AT2G38380 // AT3G22840 // AT2G37130 // AT3G61470 // AT1G61520 // AT1G14550 // AT1G44970 // AT2G34060
GO:0009414	P	response to water deprivation	14	698	229	37767	0.00016	0.0077	// AT1G20450 // AT2G35930 // AT3G50970 // AT1G32640 // AT3G61890 // AT1G01470 // AT4G18780 // AT4G25480 // AT4G27410 // AT2G39800 // AT4G34240 // AT5G59320 // AT5G25610 // AT4G25490
GO:0048046	C	apoplast	12	698	182	37767	0.00024	0.008	// AT5G05340 // AT4G18510 // AT4G27520 // AT3G16370 // AT1G09310 // AT3G10080 // AT2G43620 // AT1G29660 // AT3G16530 // AT3G23805 // AT1G68560 // AT4G37800
GO:0034637	P	cellular carbohydrate biosynthetic process	12	698	177	37767	0.00019	0.0088	// AT3G62720 // AT1G62540 // AT5G60890 // AT4G18780 // AT3G43190 // AT5G44030 // AT4G17090 // AT5G10100 // AT5G04360 // AT1G12140 // AT4G39770 // AT5G17420
GO:0019748	P	secondary metabolic process	22	698	489	37767	0.0002	0.0089	// AT1G10370 // AT1G62540 // AT1G32640 // AT3G44320 // AT3G57020 // AT3G17390 // AT3G45640 // AT1G12140 // AT3G53130 // AT5G48010 // AT5G60890 // AT5G14700 // AT5G26000 // AT1G55670 // AT5G08640 // AT4G19230 // AT3G57010 // AT5G25980 // AT4G18780 // AT2G45400 // AT2G29440 // AT2G22990
GO:0016049	P	cell growth	15	698	265	37767	0.00021	0.0091	// AT4G17030 // AT3G45970 // AT3G45960 // AT1G05800 // AT1G63030 // AT2G28950 // AT4G38400 // AT3G62720 // AT3G49120 // AT3G18000 // AT5G54380 // AT1G10550 // AT1G26770 // AT1G12610 // AT3G15370
GO:0010038	P	response to metal ion	14	698	238	37767	0.00023	0.0092	// AT1G13930 // AT3G50060 // AT4G38620 // AT5G24770 // AT3G16350 // AT2G39450 // AT3G47600 // AT1G20340 // AT1G62480 // AT4G34990 // AT2G23290 // AT4G23670 // AT5G37770 // AT4G37260
GO:0051707	P	response to other organism	25	698	599	37767	0.00023	0.0092	// AT3G49120 // AT4G12720 // AT2G34930 // AT5G46330 // AT5G44030 // AT3G45640 // AT3G45680 // AT1G05800 // AT5G42650 // AT5G60890 // AT1G71880 // AT4G23670 // AT1G19180 // AT3G09260 // AT4G36000 // AT5G24770 // AT1G72140 // AT5G45110 // AT3G25780 // AT5G38280 // AT2G37130 // AT2G43510 // AT4G31800 // AT4G18780 // AT3G14310
GO:0016137	P	glycoside metabolic process	9	698	104	37767	0.00023	0.0092	// AT1G62540 // AT5G60890 // AT3G44320 // AT3G43190 // AT5G25980 // AT5G10100 // AT5G26000 // AT1G12140 // AT4G39770
GO:0050832	P	defense response to fungus	9	698	108	37767	0.00029	0.011	// AT2G37130 // AT3G49120 // AT1G05800 // AT2G43510 // AT4G31800 // AT2G34930 // AT4G18780 // AT5G44030 // AT5G45110
GO:0008361	P	regulation of cell size	15	698	274	37767	0.0003	0.011	// AT4G17030 // AT3G45970 // AT3G45960 // AT1G05800 // AT1G63030 // AT2G28950 // AT4G38400 // AT3G62720 // AT3G49120 // AT3G18000 // AT5G54380 // AT1G10550 // AT1G26770 // AT1G12610 // AT3G15370
GO:0009739	P	response to gibberellin stimulus	11	698	159	37767	0.0003	0.011	// AT3G50060 // AT4G38620 // AT4G36410 // AT5G15230 // AT3G16350 // AT5G14920 // AT4G23060 // AT5G37770 // AT5G60890 // AT3G11280 // AT4G37260
GO:0006073	P	cellular glucan metabolic process	8	698	87	37767	0.00034	0.011	// AT3G62720 // AT4G18780 // AT5G44030 // AT4G37800 // AT4G17090 // AT3G18660 // AT5G04360 // AT5G17420
GO:0010035	P	response to inorganic substance	15	698	279	37767	0.00035	0.011	// AT1G13930 // AT3G50060 // AT4G38620 // AT5G24770 // AT3G16350 // AT2G39450 // AT3G47600 // AT1G20340 // AT1G62480 // AT4G34990 // AT2G23290 // AT4G23670 // AT2G28210 // AT5G37770 // AT4G37260
GO:0032535	P	regulation of cellular component size	15	698	277	37767	0.00033	0.011	// AT4G17030 // AT3G45970 // AT3G45960 // AT1G05800 // AT1G63030 // AT2G28950 // AT4G38400 // AT3G62720 // AT3G49120 // AT3G18000 // AT5G54380 // AT1G10550 // AT1G26770 // AT1G12610 // AT3G15370
GO:0090066	P	regulation of anatomical structure size	15	698	277	37767	0.00033	0.011	// AT4G17030 // AT3G45970 // AT3G45960 // AT1G05800 // AT1G63030 // AT2G28950 // AT4G38400 // AT3G62720 // AT3G49120 // AT3G18000 // AT5G54380 // AT1G10550 // AT1G26770 // AT1G12610 // AT3G15370
GO:0009631	P	cold acclimation	5	698	29	37767	0.00035	0.011	// AT4G25480 // AT1G20450 // AT3G50970 // AT4G25470 // AT4G25490
GO:0044042	P	glucan metabolic process	8	698	89	37767	0.0004	0.012	// AT3G62720 // AT4G18780 // AT5G44030 // AT4G37800 // AT4G17090 // AT3G18660 // AT5G04360 // AT5G17420
GO:0003700	F	transcription factor activity	64	698	2173	37767	0.00024	0.012	// AT5G49520 // AT3G50060 // AT4G38620 // AT3G24310 // AT1G63030 // AT1G32640 // AT3G61890 // AT3G16350 // AT4G16750 // AT3G24520 // AT5G60890 // AT1G71930 // AT4G34410 // AT2G44840 // AT2G23290 // AT5G64530 // AT3G55980 // AT2G22760 // AT3G22830 // AT5G43650 // AT1G01030 // AT4G39070 // AT4G07950 // AT4G32800 // AT1G62975 // AT5G51990 // AT1G12610 // AT4G01540 // AT1G74930 // AT4G25480 // AT4G27…
GO:0015833	P	peptide transport	7	698	68	37767	0.00043	0.013	// AT4G27730 // AT1G22570 // AT1G72140 // AT1G22550 // AT3G45680 // AT3G47960 // AT4G21680
GO:0006857	P	oligopeptide transport	7	698	68	37767	0.00043	0.013	// AT4G27730 // AT1G22570 // AT1G72140 // AT1G22550 // AT3G45680 // AT3G47960 // AT4G21680
GO:0065007	P	biological regulation	107	698	4188	37767	0.00045	0.013	// AT5G49520 // AT3G50060 // AT5G06870 // AT3G24310 // AT4G14690 // AT5G15230 // AT2G34930 // AT3G63440 // AT2G20142 // AT5G43650 // AT1G76310 // AT3G45970 // AT4G18510 // AT1G05800 // AT2G19780 // AT4G25480 // AT1G19050 // AT1G74500 // AT1G19180 // AT4G37780 // AT5G23280 // AT4G38400 // AT5G54380 // AT3G17609 // AT4G31820 // AT4G25470 // AT1G77390 // AT1G21910 // AT4G17030 // AT3G45960 // AT1G20…
GO:0046910	F	pectinesterase inhibitor activity	7	698	64	37767	0.00031	0.014	// AT1G14890 // AT3G47380 // AT1G62770 // AT4G00080 // AT3G49330 // AT5G62350 // AT5G62360
GO:0009409	P	response to cold	16	698	328	37767	0.00063	0.018	// AT1G20450 // AT5G57560 // AT2G16500 // AT3G22840 // AT1G09560 // AT4G17090 // AT5G63770 // AT4G25480 // AT3G17390 // AT3G50970 // AT5G37770 // AT4G34710 // AT3G45640 // AT4G30650 // AT4G25470 // AT4G25490
GO:0070001	F	aspartic-type peptidase activity	8	698	92	37767	0.00049	0.018	// AT2G39710 // AT1G01300 // AT5G19100 // AT3G25700 // AT5G19110 // AT5G10770 // AT4G16563 // AT5G07030
GO:0004190	F	aspartic-type endopeptidase activity	8	698	92	37767	0.00049	0.018	// AT2G39710 // AT1G01300 // AT5G19100 // AT3G25700 // AT5G19110 // AT5G10770 // AT4G16563 // AT5G07030
GO:0030528	F	transcription regulator activity	68	698	2417	37767	0.00051	0.018	// AT5G49520 // AT3G50060 // AT4G38620 // AT3G24310 // AT1G63030 // AT1G32640 // AT3G61890 // AT3G16350 // AT4G16750 // AT3G24520 // AT1G33760 // AT1G71930 // AT4G34410 // AT2G44840 // AT2G23290 // AT5G64530 // AT3G55980 // AT5G60890 // AT2G22760 // AT3G22830 // AT5G43650 // AT1G01030 // AT4G39070 // AT4G07950 // AT4G32800 // AT1G62975 // AT5G51990 // AT1G12610 // AT4G01540 // AT1G74930 // AT4G25…
GO:0009694	P	jasmonic acid metabolic process	5	698	34	37767	0.00067	0.019	// AT3G25780 // AT5G07010 // AT1G05800 // AT1G72520 // AT5G42650
GO:0004857	F	enzyme inhibitor activity	11	698	173	37767	0.00058	0.019	// AT2G02100 // AT2G43510 // AT1G14890 // AT3G47380 // AT1G02810 // AT1G62770 // AT4G00080 // AT3G49330 // AT5G62350 // AT5G62360 // AT2G47550
GO:0016020	C	membrane	103	698	4068	37767	0.00078	0.022	// AT3G61750 // AT1G01300 // AT5G20260 // AT5G54400 // AT1G16370 // AT2G20142 // AT3G59350 // AT1G77380 // AT4G21680 // AT3G27210 // AT5G58480 // AT1G22710 // AT2G38060 // AT5G15350 // AT1G20450 // AT3G14810 // AT5G17700 // AT3G18890 // AT1G12500 // AT5G54380 // AT2G34510 // AT5G64850 // AT1G22550 // AT2G46760 // AT3G50970 // AT4G27520 // AT1G31330 // AT4G04640 // AT5G49280 // AT5G10430 // AT1G61…
GO:0046658	C	anchored to plasma membrane	5	698	36	37767	0.00085	0.022	// AT4G27520 // AT3G15720 // AT5G58480 // AT5G15350 // AT1G64760
GO:0040007	P	growth	16	698	340	37767	0.0009	0.024	// AT4G17030 // AT3G45970 // AT3G45960 // AT1G05800 // AT1G63030 // AT2G28950 // AT4G38400 // AT3G62720 // AT3G49120 // AT3G18000 // AT1G72520 // AT5G54380 // AT1G10550 // AT1G26770 // AT1G12610 // AT3G15370
GO:0051704	P	multi-organism process	28	698	776	37767	0.00091	0.024	// AT3G49120 // AT2G41890 // AT4G12720 // AT2G34930 // AT5G10550 // AT5G46330 // AT5G44030 // AT3G45640 // AT3G45680 // AT1G05800 // AT5G42650 // AT5G60890 // AT1G71880 // AT4G23670 // AT1G19180 // AT3G09260 // AT4G36000 // AT5G24770 // AT1G72140 // AT5G45110 // AT5G65630 // AT3G25780 // AT5G38280 // AT2G37130 // AT2G43510 // AT4G31800 // AT4G18780 // AT3G14310
GO:0031323	P	regulation of cellular metabolic process	58	698	2036	37767	0.001	0.026	// AT5G49520 // AT3G50060 // AT4G38620 // AT1G69040 // AT3G24310 // AT4G14690 // AT1G32640 // AT3G61890 // AT3G16350 // AT3G45640 // AT4G34410 // AT2G44840 // AT2G23290 // AT3G55980 // AT2G22760 // AT5G51990 // AT1G01030 // AT4G39070 // AT4G07950 // AT4G32800 // AT1G62975 // AT5G43650 // AT1G74930 // AT4G25480 // AT1G33760 // AT1G18400 // AT1G74500 // AT1G55670 // AT4G26370 // AT4G37780 // AT5G23…
GO:0031407	P	oxylipin metabolic process	5	698	39	37767	0.0012	0.03	// AT3G25780 // AT5G07010 // AT1G05800 // AT1G72520 // AT5G42650
GO:0006790	P	sulfur metabolic process	12	698	220	37767	0.0012	0.03	// AT1G62540 // AT5G60890 // AT2G36880 // AT3G44320 // AT4G37770 // AT5G25980 // AT4G08040 // AT3G03780 // AT3G17390 // AT3G45640 // AT5G26000 // AT1G12140
GO:0005576	C	extracellular region	14	698	285	37767	0.0013	0.03	// AT5G05340 // AT4G18510 // AT4G27520 // AT1G53840 // AT1G09310 // AT3G16530 // AT3G10080 // AT3G16370 // AT2G43620 // AT1G29660 // AT2G22860 // AT3G23805 // AT1G68560 // AT4G37800
GO:0050794	P	regulation of cellular process	87	698	3375	37767	0.0012	0.031	// AT5G49520 // AT3G50060 // AT5G06870 // AT3G24310 // AT4G14690 // AT5G15230 // AT2G34930 // AT2G20142 // AT5G43650 // AT1G76310 // AT1G69040 // AT4G18510 // AT1G05800 // AT2G19780 // AT4G25480 // AT1G19050 // AT1G74500 // AT1G19180 // AT4G37780 // AT5G23280 // AT5G54380 // AT3G17609 // AT4G25470 // AT1G77390 // AT1G21910 // AT1G20340 // AT2G22850 // AT2G46510 // AT4G34990 // AT1G19040 // AT5G43…
GO:0015979	P	photosynthesis	10	698	162	37767	0.0013	0.031	// AT1G29930 // AT5G66570 // AT1G31330 // AT4G04640 // AT3G61470 // AT4G03280 // AT1G61520 // AT4G12800 // AT2G46820 // AT1G55670
GO:0016168	F	chlorophyll binding	5	698	38	37767	0.0011	0.033	// AT1G29930 // AT3G22840 // AT1G61520 // AT3G61470 // AT4G14690
GO:0019760	P	glucosinolate metabolic process	6	698	62	37767	0.0015	0.034	// AT1G62540 // AT5G60890 // AT3G44320 // AT5G25980 // AT5G26000 // AT1G12140
GO:0016143	P	S-glycoside metabolic process	6	698	62	37767	0.0015	0.034	// AT1G62540 // AT5G60890 // AT3G44320 // AT5G25980 // AT5G26000 // AT1G12140
GO:0019757	P	glycosinolate metabolic process	6	698	62	37767	0.0015	0.034	// AT1G62540 // AT5G60890 // AT3G44320 // AT5G25980 // AT5G26000 // AT1G12140
GO:0016759	F	cellulose synthase activity	5	698	39	37767	0.0012	0.035	// AT3G56000 // AT4G18780 // AT3G28180 // AT5G17420 // AT5G44030
GO:0009751	P	response to salicylic acid stimulus	11	698	200	37767	0.0018	0.04	// AT3G50060 // AT4G38620 // AT4G31800 // AT5G60890 // AT4G18780 // AT3G47600 // AT5G44030 // AT4G34990 // AT3G11280 // AT1G76930 // AT4G37260
GO:0006979	P	response to oxidative stress	15	698	332	37767	0.0019	0.042	// AT5G05340 // AT5G26030 // AT2G16500 // AT1G32640 // AT5G24770 // AT4G12720 // AT1G11210 // AT2G39800 // AT5G37770 // AT1G14550 // AT4G34710 // AT3G45640 // AT3G47860 // AT1G44970 // AT2G34060
GO:0009889	P	regulation of biosynthetic process	53	698	1881	37767	0.002	0.044	// AT5G49520 // AT3G50060 // AT4G38620 // AT3G24310 // AT4G14690 // AT1G32640 // AT3G61890 // AT3G16350 // AT4G34410 // AT2G44840 // AT2G23290 // AT3G55980 // AT2G22760 // AT5G51990 // AT1G01030 // AT4G39070 // AT4G07950 // AT4G32800 // AT1G62975 // AT5G43650 // AT1G74930 // AT4G25480 // AT1G33760 // AT1G18400 // AT1G74500 // AT4G26370 // AT4G37780 // AT5G23280 // AT1G19040 // AT1G44830 // AT3G47…
GO:0031326	P	regulation of cellular biosynthetic process	53	698	1881	37767	0.002	0.044	// AT5G49520 // AT3G50060 // AT4G38620 // AT3G24310 // AT4G14690 // AT1G32640 // AT3G61890 // AT3G16350 // AT4G34410 // AT2G44840 // AT2G23290 // AT3G55980 // AT2G22760 // AT5G51990 // AT1G01030 // AT4G39070 // AT4G07950 // AT4G32800 // AT1G62975 // AT5G43650 // AT1G74930 // AT4G25480 // AT1G33760 // AT1G18400 // AT1G74500 // AT4G26370 // AT4G37780 // AT5G23280 // AT1G19040 // AT1G44830 // AT3G47…
GO:0009521	C	photosystem	6	698	66	37767	0.002	0.044	// AT5G66570 // AT1G31330 // AT3G61470 // AT4G12800 // AT2G46820 // AT1G55670
GO:0044036	P	cell wall macromolecule metabolic process	5	698	45	37767	0.0021	0.045	// AT2G33580 // AT1G68560 // AT1G51940 // AT3G16920 // AT5G17420
GO:0016705	F	oxidoreductase activity, acting on paired donors, with incorporation or reduction of molecular oxygen	11	698	198	37767	0.0016	0.045	// AT3G12900 // AT3G61580 // AT3G61750 // AT1G62540 // AT1G01600 // AT2G34490 // AT4G37760 // AT5G08640 // AT2G29980 // AT4G19230 // AT1G12140
GO:0009767	P	photosynthetic electron transport chain	5	698	46	37767	0.0023	0.048	// AT1G55670 // AT4G04640 // AT5G66570 // AT4G03280 // AT2G46820
GO:0046686	P	response to cadmium ion	10	698	178	37767	0.0024	0.05	// AT1G13930 // AT3G50060 // AT4G38620 // AT1G62480 // AT3G16350 // AT3G47600 // AT4G34990 // AT2G23290 // AT4G23670 // AT4G37260
GO:0030234	F	enzyme regulator activity	16	698	367	37767	0.0019	0.05	// AT2G02100 // AT2G43510 // AT1G14890 // AT3G47380 // AT1G02810 // AT1G62770 // AT4G04640 // AT4G00080 // AT3G49330 // AT5G62350 // AT3G11520 // AT1G77390 // AT5G62360 // AT2G47550 // AT1G76310 // AT2G26760
GO:0080090	P	regulation of primary metabolic process	54	698	1952	37767	0.0027	0.055	// AT5G49520 // AT3G50060 // AT4G38620 // AT1G69040 // AT3G24310 // AT1G32640 // AT3G61890 // AT3G16350 // AT4G34410 // AT2G44840 // AT2G23290 // AT3G55980 // AT2G22760 // AT5G51990 // AT1G01030 // AT4G39070 // AT4G07950 // AT4G32800 // AT1G62975 // AT5G43650 // AT1G74930 // AT4G25480 // AT1G33760 // AT1G18400 // AT1G74500 // AT4G26370 // AT4G37780 // AT5G23280 // AT1G19040 // AT1G44830 // AT3G47…
GO:0016563	F	transcription activator activity	10	698	177	37767	0.0023	0.055	// AT1G71930 // AT1G32640 // AT3G61890 // AT5G60890 // AT4G01540 // AT4G25480 // AT4G27410 // AT5G51990 // AT4G25470 // AT4G25490
GO:0016788	F	hydrolase activity, acting on ester bonds	37	698	1200	37767	0.0023	0.055	// AT3G49330 // AT1G02810 // AT3G16370 // AT5G62350 // AT5G53370 // AT2G23610 // AT4G02330 // AT3G47380 // AT1G05800 // AT1G56670 // AT5G24780 // AT1G14890 // AT2G01880 // AT5G24770 // AT5G23870 // AT5G10100 // AT5G26670 // AT4G39770 // AT4G21590 // AT5G45670 // AT1G62770 // AT4G17760 // AT4G19420 // AT1G02660 // AT1G29660 // AT5G41080 // AT5G62360 // AT4G18010 // AT1G67830 // AT1G53840 // AT2G03…
GO:0006629	P	lipid metabolic process	28	698	841	37767	0.0028	0.056	// AT3G61580 // AT2G03980 // AT5G07010 // AT3G16370 // AT3G07960 // AT4G19230 // AT5G14700 // AT3G53130 // AT5G48010 // AT1G05800 // AT1G56670 // AT5G42650 // AT1G01600 // AT4G37760 // AT2G29980 // AT5G45670 // AT1G02660 // AT1G29660 // AT5G41080 // AT3G25780 // AT5G38020 // AT5G16010 // AT4G18780 // AT2G45400 // AT3G18000 // AT3G48460 // AT5G57800 // AT1G72520
GO:0005976	P	polysaccharide metabolic process	9	698	152	37767	0.0028	0.056	// AT3G62720 // AT3G18660 // AT4G18780 // AT5G44030 // AT4G37800 // AT4G17090 // AT5G04360 // AT1G68560 // AT5G17420
GO:0060560	P	developmental growth involved in morphogenesis	10	698	186	37767	0.0033	0.063	// AT4G17030 // AT3G45970 // AT3G49120 // AT2G28950 // AT4G38400 // AT3G45960 // AT3G18000 // AT5G54380 // AT1G26770 // AT3G15370
GO:0009826	P	unidimensional cell growth	10	698	186	37767	0.0033	0.063	// AT4G17030 // AT3G45970 // AT3G49120 // AT2G28950 // AT4G38400 // AT3G45960 // AT3G18000 // AT5G54380 // AT1G26770 // AT3G15370
GO:0044264	P	cellular polysaccharide metabolic process	8	698	127	37767	0.0033	0.063	// AT3G62720 // AT4G18780 // AT5G44030 // AT4G37800 // AT4G17090 // AT3G18660 // AT5G04360 // AT5G17420
GO:0050789	P	regulation of biological process	91	698	3697	37767	0.0036	0.066	// AT5G49520 // AT3G50060 // AT5G06870 // AT3G24310 // AT4G14690 // AT5G15230 // AT2G34930 // AT2G20142 // AT5G43650 // AT1G76310 // AT1G69040 // AT4G18510 // AT1G05800 // AT2G19780 // AT4G25480 // AT1G19050 // AT1G74500 // AT1G19180 // AT4G37780 // AT5G23280 // AT5G54380 // AT3G17609 // AT4G31820 // AT4G25470 // AT1G77390 // AT1G21910 // AT1G20340 // AT2G22850 // AT2G46510 // AT4G34990 // AT1G19…
GO:0031226	C	intrinsic to plasma membrane	6	698	74	37767	0.0034	0.068	// AT4G27520 // AT1G64760 // AT3G15720 // AT5G58480 // AT1G10550 // AT5G15350
GO:0019222	P	regulation of metabolic process	59	698	2210	37767	0.0037	0.069	// AT5G49520 // AT3G50060 // AT4G38620 // AT1G69040 // AT3G24310 // AT4G14690 // AT1G32640 // AT3G61890 // AT3G16350 // AT3G45640 // AT4G34410 // AT2G44840 // AT2G23290 // AT3G55980 // AT2G22760 // AT5G51990 // AT1G01030 // AT4G39070 // AT4G07950 // AT4G32800 // AT1G62975 // AT5G43650 // AT1G74930 // AT4G25480 // AT1G33760 // AT1G18400 // AT1G74500 // AT1G55670 // AT4G26370 // AT4G37780 // AT5G23…
GO:0034641	P	cellular nitrogen compound metabolic process	19	698	506	37767	0.0038	0.069	// AT1G58290 // AT5G26030 // AT3G61750 // AT4G34710 // AT3G57010 // AT1G69040 // AT5G60890 // AT2G36880 // AT4G37770 // AT3G18000 // AT3G57020 // AT4G08040 // AT2G39800 // AT3G03780 // AT3G17390 // AT3G45640 // AT1G55670 // AT5G10330 // AT4G14690
GO:0012505	C	endomembrane system	85	698	3416	37767	0.0037	0.069	// AT3G05470 // AT1G54890 // AT2G41890 // AT2G26380 // AT3G01260 // AT3G06770 // AT5G19100 // AT1G02810 // AT2G43870 // AT5G19110 // AT5G36920 // AT3G10080 // AT5G62350 // AT1G32970 // AT3G47380 // AT5G44578 // AT4G01540 // AT2G34810 // AT5G44575 // AT2G33850 // AT1G11210 // AT3G61490 // AT5G52330 // AT5G44572 // AT5G41400 // AT4G15700 // AT2G24130 // AT5G17847 // AT1G56670 // AT4G01440 // AT4G22…
GO:0005886	C	plasma membrane	42	698	1456	37767	0.0039	0.069	// AT2G38530 // AT3G25780 // AT1G30360 // AT1G64760 // AT5G55730 // AT4G20940 // AT1G72140 // AT4G27720 // AT5G54400 // AT1G10550 // AT2G45820 // AT3G59350 // AT4G21680 // AT4G27520 // AT3G27210 // AT5G58480 // AT1G22710 // AT2G44300 // AT1G71880 // AT3G47960 // AT5G25930 // AT3G45780 // AT1G75500 // AT2G23120 // AT1G29980 // AT5G24010 // AT5G54380 // AT2G33580 // AT1G11960 // AT1G13930 // AT5G64…
GO:0019684	P	photosynthesis, light reaction	7	698	103	37767	0.004	0.072	// AT5G66570 // AT4G04640 // AT4G03280 // AT3G61470 // AT4G12800 // AT2G46820 // AT1G55670
GO:0065008	P	regulation of biological quality	23	698	665	37767	0.0041	0.073	// AT3G49120 // AT1G63030 // AT2G28950 // AT2G39450 // AT1G10550 // AT3G63440 // AT4G15700 // AT3G45970 // AT1G26770 // AT1G05800 // AT1G12610 // AT1G55670 // AT4G38400 // AT3G62720 // AT1G77690 // AT5G54380 // AT4G31820 // AT3G15370 // AT4G17030 // AT3G45960 // AT2G45400 // AT1G20340 // AT3G18000
GO:0006869	P	lipid transport	9	698	163	37767	0.0044	0.075	// AT2G38530 // AT3G22120 // AT2G38540 // AT5G48485 // AT1G17840 // AT1G12090 // AT2G44300 // AT4G22610 // AT5G01870
GO:0009250	P	glucan biosynthetic process	5	698	54	37767	0.0043	0.075	// AT5G04360 // AT4G18780 // AT3G62720 // AT5G44030 // AT5G17420
GO:0016138	P	glycoside biosynthetic process	6	698	79	37767	0.0046	0.077	// AT1G62540 // AT5G60890 // AT3G43190 // AT5G10100 // AT1G12140 // AT4G39770
GO:0009723	P	response to ethylene stimulus	10	698	199	37767	0.0051	0.086	// AT3G50060 // AT4G38620 // AT5G64900 // AT3G16350 // AT4G18780 // AT3G47600 // AT5G44030 // AT2G44840 // AT4G34990 // AT4G37260
GO:0042398	P	cellular amino acid derivative biosynthetic process	11	698	233	37767	0.0053	0.088	// AT4G34710 // AT1G32640 // AT5G60890 // AT2G36880 // AT2G45400 // AT4G37770 // AT5G14700 // AT3G18000 // AT4G08040 // AT5G08640 // AT3G17390
GO:0004650	F	polygalacturonase activity	6	698	77	37767	0.004	0.088	// AT1G70370 // AT3G06770 // AT3G15720 // AT2G43870 // AT4G23820 // AT3G61490
GO:0004175	F	endopeptidase activity	12	698	257	37767	0.004	0.088	// AT1G32970 // AT2G39710 // AT1G01300 // AT5G19100 // AT2G05920 // AT3G25700 // AT3G43960 // AT5G10770 // AT4G16563 // AT5G19110 // AT5G07030 // AT3G48350
GO:0010556	P	regulation of macromolecule biosynthetic process	50	698	1843	37767	0.0055	0.089	// AT5G49520 // AT3G50060 // AT4G38620 // AT3G24310 // AT1G32640 // AT3G61890 // AT3G16350 // AT4G34410 // AT2G44840 // AT2G23290 // AT3G55980 // AT2G22760 // AT5G51990 // AT1G01030 // AT4G39070 // AT4G07950 // AT4G32800 // AT1G62975 // AT5G43650 // AT1G74930 // AT4G25480 // AT1G33760 // AT1G18400 // AT1G74500 // AT4G26370 // AT4G37780 // AT5G23280 // AT5G51790 // AT1G44830 // AT3G47600 // AT3G17…
GO:0051171	P	regulation of nitrogen compound metabolic process	51	698	1888	37767	0.0055	0.089	// AT5G49520 // AT3G50060 // AT4G38620 // AT1G69040 // AT3G24310 // AT4G14690 // AT1G32640 // AT3G61890 // AT3G16350 // AT4G34410 // AT2G44840 // AT2G23290 // AT3G55980 // AT2G22760 // AT5G51990 // AT1G01030 // AT4G39070 // AT4G07950 // AT4G32800 // AT1G62975 // AT5G43650 // AT1G74930 // AT4G25480 // AT1G33760 // AT1G18400 // AT1G74500 // AT4G26370 // AT4G37780 // AT5G23280 // AT5G51790 // AT1G44…
GO:0045449	P	regulation of transcription	49	698	1802	37767	0.0057	0.091	// AT5G49520 // AT3G50060 // AT4G38620 // AT3G24310 // AT1G32640 // AT3G61890 // AT3G16350 // AT4G34410 // AT2G44840 // AT2G23290 // AT3G55980 // AT2G22760 // AT5G51990 // AT1G01030 // AT4G39070 // AT4G07950 // AT4G32800 // AT1G62975 // AT5G43650 // AT1G74930 // AT4G25480 // AT1G33760 // AT1G18400 // AT1G74500 // AT4G26370 // AT4G37780 // AT5G23280 // AT5G51790 // AT1G44830 // AT3G47600 // AT3G17…
GO:0009055	F	electron carrier activity	13	698	294	37767	0.0044	0.091	// AT5G05340 // AT2G37130 // AT4G15700 // AT4G27520 // AT2G38380 // AT4G03280 // AT3G44190 // AT1G14550 // AT1G44970 // AT5G15350 // AT2G34060 // AT2G34810 // AT1G72520
GO:0031224	C	intrinsic to membrane	26	698	806	37767	0.0057	0.094	// AT4G27520 // AT1G64760 // AT5G55730 // AT1G21090 // AT5G65390 // AT5G10430 // AT5G11740 // AT1G10550 // AT2G20142 // AT1G75000 // AT5G58480 // AT2G44300 // AT3G43960 // AT2G03240 // AT3G15720 // AT3G61640 // AT1G29980 // AT2G34510 // AT1G55330 // AT4G26320 // AT5G49280 // AT4G16140 // AT4G30650 // AT3G06750 // AT5G15350 // AT3G16860
GO:0046527	F	glucosyltransferase activity	8	698	136	37767	0.0049	0.096	// AT4G18780 // AT1G07260 // AT3G43190 // AT3G21560 // AT3G56000 // AT5G44030 // AT3G28180 // AT5G17420
GO:0016620	F	oxidoreductase activity, acting on the aldehyde or oxo group of donors, NAD or NADP as acceptor	5	698	56	37767	0.005	0.096	// AT1G58290 // AT2G39800 // AT4G34240 // AT5G14700 // AT1G12900
GO:0048589	P	developmental growth	11	698	242	37767	0.0069	0.11	// AT4G17030 // AT3G45970 // AT3G49120 // AT2G28950 // AT4G38400 // AT3G62720 // AT3G45960 // AT3G18000 // AT5G54380 // AT1G26770 // AT3G15370
GO:0044272	P	sulfur compound biosynthetic process	7	698	115	37767	0.007	0.11	// AT1G62540 // AT5G60890 // AT2G36880 // AT3G03780 // AT3G17390 // AT3G45640 // AT1G12140
GO:0042742	P	defense response to bacterium	9	698	177	37767	0.0072	0.11	// AT3G49120 // AT4G31800 // AT4G12720 // AT4G18780 // AT5G46330 // AT5G44030 // AT5G45110 // AT4G23670 // AT1G19180
GO:0009791	P	post-embryonic development	23	698	705	37767	0.0079	0.12	// AT3G50060 // AT3G63440 // AT3G45640 // AT5G05950 // AT1G01030 // AT4G18010 // AT2G46870 // AT1G77690 // AT5G37770 // AT5G01040 // AT1G19180 // AT5G53290 // AT1G75520 // AT5G54380 // AT4G19230 // AT4G31820 // AT5G10330 // AT2G16500 // AT1G01470 // AT3G18000 // AT4G34710 // AT1G80730 // AT2G21540
GO:0019219	P	regulation of nucleobase, nucleoside, nucleotide and nucleic acid metabolic process	49	698	1847	37767	0.0088	0.13	// AT5G49520 // AT3G50060 // AT4G38620 // AT3G24310 // AT1G32640 // AT3G61890 // AT3G16350 // AT4G34410 // AT2G44840 // AT2G23290 // AT3G55980 // AT2G22760 // AT5G51990 // AT1G01030 // AT4G39070 // AT4G07950 // AT4G32800 // AT1G62975 // AT5G43650 // AT1G74930 // AT4G25480 // AT1G33760 // AT1G18400 // AT1G74500 // AT4G26370 // AT4G37780 // AT5G23280 // AT5G51790 // AT1G44830 // AT3G47600 // AT3G17…
GO:0016491	F	oxidoreductase activity	41	698	1463	37767	0.0069	0.13	// AT2G46760 // AT1G58290 // AT3G61580 // AT3G61750 // AT2G19800 // AT2G17845 // AT2G34810 // AT3G49120 // AT2G39800 // AT1G44970 // AT1G12900 // AT5G14700 // AT3G63440 // AT3G53130 // AT1G12140 // AT1G62540 // AT3G12900 // AT5G66570 // AT1G01600 // AT4G37760 // AT1G14550 // AT2G34060 // AT5G01040 // AT5G05340 // AT1G64710 // AT4G15700 // AT2G29980 // AT1G31710 // AT5G08640 // AT3G44190 // AT4G19…
GO:0003677	F	DNA binding	72	698	2892	37767	0.0072	0.13	// AT5G49520 // AT3G50060 // AT4G38620 // AT3G24310 // AT1G63030 // AT1G32640 // AT3G61890 // AT3G16350 // AT4G16750 // AT5G10550 // AT5G60890 // AT1G71930 // AT4G34410 // AT2G44840 // AT2G23290 // AT5G64530 // AT3G17609 // AT2G45820 // AT3G22830 // AT5G43650 // AT2G21450 // AT4G39070 // AT4G07950 // AT5G51990 // AT2G46510 // AT4G32800 // AT1G62975 // AT2G41870 // AT1G12610 // AT4G01540 // AT1G74…
GO:0009735	P	response to cytokinin stimulus	6	698	94	37767	0.0099	0.15	// AT1G69040 // AT4G01540 // AT1G71930 // AT3G48100 // AT1G19050 // AT5G62920
GO:0010468	P	regulation of gene expression	52	698	2001	37767	0.01	0.15	// AT5G49520 // AT3G50060 // AT4G38620 // AT3G24310 // AT1G32640 // AT3G61890 // AT3G16350 // AT4G34410 // AT2G44840 // AT2G23290 // AT3G55980 // AT2G22760 // AT5G51990 // AT1G01030 // AT4G39070 // AT4G07950 // AT4G32800 // AT1G62975 // AT5G43650 // AT1G74930 // AT4G25480 // AT1G33760 // AT1G18400 // AT1G74500 // AT1G55670 // AT4G26370 // AT4G37780 // AT5G23280 // AT5G51790 // AT1G44830 // AT3G47…
GO:0009266	P	response to temperature stimulus	17	698	485	37767	0.011	0.16	// AT1G20450 // AT5G57560 // AT2G16500 // AT4G21870 // AT3G22840 // AT1G09560 // AT4G17090 // AT5G63770 // AT4G25480 // AT3G17390 // AT3G50970 // AT5G37770 // AT4G34710 // AT3G45640 // AT4G30650 // AT4G25470 // AT4G25490
GO:0060255	P	regulation of macromolecule metabolic process	53	698	2060	37767	0.011	0.16	// AT5G49520 // AT3G50060 // AT4G38620 // AT3G24310 // AT1G32640 // AT3G61890 // AT3G16350 // AT4G34410 // AT2G44840 // AT2G23290 // AT3G55980 // AT2G22760 // AT5G51990 // AT1G01030 // AT4G39070 // AT4G07950 // AT4G32800 // AT1G62975 // AT5G43650 // AT1G74930 // AT4G25480 // AT1G33760 // AT1G18400 // AT1G74500 // AT1G55670 // AT4G26370 // AT4G37780 // AT5G23280 // AT5G51790 // AT1G44830 // AT3G47…
GO:0008194	F	UDP-glycosyltransferase activity	10	698	219	37767	0.0095	0.16	// AT1G12990 // AT4G02130 // AT1G70090 // AT3G50760 // AT3G62720 // AT1G07260 // AT3G43190 // AT3G21560 // AT2G16890 // AT3G27540
GO:0016052	P	carbohydrate catabolic process	7	698	128	37767	0.012	0.17	// AT3G44320 // AT1G12900 // AT5G25980 // AT4G17090 // AT5G04360 // AT5G26000 // AT1G68560
GO:0016684	F	oxidoreductase activity, acting on peroxide as acceptor	7	698	127	37767	0.011	0.18	// AT5G05340 // AT2G37130 // AT3G49120 // AT2G38380 // AT1G14550 // AT1G44970 // AT2G34060
GO:0020037	F	heme binding	6	698	97	37767	0.011	0.18	// AT5G05340 // AT2G37130 // AT2G38380 // AT1G14550 // AT1G44970 // AT2G34060
GO:0004601	F	peroxidase activity	7	698	127	37767	0.011	0.18	// AT5G05340 // AT2G37130 // AT3G49120 // AT2G38380 // AT1G14550 // AT1G44970 // AT2G34060
GO:0016740	F	transferase activity	79	698	3321	37767	0.014	0.21	// AT4G26510 // AT2G38400 // AT1G05100 // AT2G41890 // AT4G03210 // AT4G02130 // AT3G44990 // AT5G46330 // AT5G07010 // AT2G43690 // AT3G21560 // AT3G56000 // AT3G60550 // AT1G10370 // AT3G03780 // AT3G17390 // AT3G45640 // AT2G05940 // AT5G57560 // AT1G10070 // AT1G12990 // AT1G76790 // AT5G24010 // AT2G33580 // AT3G59350 // AT3G18660 // AT3G44870 // AT5G56300 // AT5G03770 // AT2G16890 // AT5G37…
GO:0044425	C	membrane part	37	698	1360	37767	0.015	0.23	// AT4G27520 // AT1G64760 // AT5G55730 // AT1G21090 // AT4G04640 // AT5G65390 // AT5G10430 // AT3G61470 // AT5G11740 // AT4G12800 // AT1G10550 // AT2G20142 // AT5G66570 // AT5G58480 // AT2G44300 // AT3G43960 // AT1G55670 // AT2G03240 // AT1G31330 // AT3G45780 // AT4G01540 // AT3G15720 // AT3G61640 // AT1G29980 // AT1G75000 // AT2G34510 // AT1G55330 // AT4G26320 // AT5G49280 // AT4G16140 // AT1G17…
GO:0006350	P	transcription	49	698	1923	37767	0.017	0.24	// AT5G49520 // AT3G50060 // AT4G38620 // AT3G24310 // AT1G32640 // AT3G61890 // AT3G16350 // AT4G34410 // AT2G44840 // AT2G23290 // AT3G55980 // AT2G22760 // AT5G51990 // AT1G01030 // AT4G39070 // AT4G07950 // AT4G32800 // AT1G62975 // AT5G43650 // AT1G74930 // AT4G25480 // AT1G33760 // AT1G18400 // AT1G74500 // AT4G26370 // AT4G37780 // AT5G23280 // AT5G51790 // AT1G44830 // AT3G47600 // AT3G17…
GO:0006575	P	cellular amino acid derivative metabolic process	12	698	315	37767	0.017	0.24	// AT4G34710 // AT1G32640 // AT5G60890 // AT2G36880 // AT2G45400 // AT4G37770 // AT5G14700 // AT3G18000 // AT4G08040 // AT5G08640 // AT3G17390 // AT2G22990
GO:0044271	P	cellular nitrogen compound biosynthetic process	14	698	394	37767	0.018	0.25	// AT1G58290 // AT5G26030 // AT4G34710 // AT5G60890 // AT2G36880 // AT3G18000 // AT3G57020 // AT2G39800 // AT3G03780 // AT3G17390 // AT3G45640 // AT3G57010 // AT5G10330 // AT4G14690
GO:0006633	P	fatty acid biosynthetic process	7	698	140	37767	0.018	0.25	// AT5G38020 // AT1G05800 // AT5G42650 // AT2G29980 // AT3G25780 // AT5G57800 // AT1G72520
GO:0009617	P	response to bacterium	10	698	247	37767	0.02	0.27	// AT3G49120 // AT4G31800 // AT4G12720 // AT4G18780 // AT5G46330 // AT5G44030 // AT5G45110 // AT3G45640 // AT4G23670 // AT1G19180
GO:0006355	P	regulation of transcription, DNA-dependent	28	698	987	37767	0.02	0.27	// AT5G49520 // AT3G50060 // AT3G24310 // AT1G32640 // AT3G61890 // AT2G44840 // AT2G23290 // AT5G51990 // AT1G44830 // AT4G32800 // AT1G74930 // AT4G25480 // AT1G33760 // AT4G26370 // AT4G37780 // AT5G53290 // AT4G25470 // AT3G17609 // AT4G34410 // AT1G21910 // AT3G03260 // AT1G77640 // AT4G31800 // AT4G07950 // AT4G16141 // AT2G22850 // AT4G34990 // AT4G37260
GO:0008757	F	S-adenosylmethionine-dependent methyltransferase activity	6	698	109	37767	0.019	0.27	// AT3G44860 // AT5G38020 // AT3G18000 // AT5G56300 // AT5G37990 // AT3G44870
GO:0051252	P	regulation of RNA metabolic process	28	698	996	37767	0.022	0.29	// AT5G49520 // AT3G50060 // AT3G24310 // AT1G32640 // AT3G61890 // AT2G44840 // AT2G23290 // AT5G51990 // AT1G44830 // AT4G32800 // AT1G74930 // AT4G25480 // AT1G33760 // AT4G26370 // AT4G37780 // AT5G53290 // AT4G25470 // AT3G17609 // AT4G34410 // AT1G21910 // AT3G03260 // AT1G77640 // AT4G31800 // AT4G07950 // AT4G16141 // AT2G22850 // AT4G34990 // AT4G37260
GO:0000096	P	sulfur amino acid metabolic process	5	698	84	37767	0.023	0.3	// AT4G08040 // AT2G36880 // AT3G03780 // AT4G37770 // AT3G17390
GO:0010287	C	plastoglobule	5	698	81	37767	0.02	0.3	// AT1G31330 // AT5G66570 // AT1G61520 // AT4G12800 // AT5G42650
GO:0016903	F	oxidoreductase activity, acting on the aldehyde or oxo group of donors	5	698	84	37767	0.023	0.33	// AT1G58290 // AT2G39800 // AT4G34240 // AT5G14700 // AT1G12900
GO:0000902	P	cell morphogenesis	10	698	259	37767	0.026	0.34	// AT4G17030 // AT3G45970 // AT3G49120 // AT2G28950 // AT4G38400 // AT3G45960 // AT3G18000 // AT5G54380 // AT1G26770 // AT3G15370
GO:0022900	P	electron transport chain	5	698	88	37767	0.027	0.35	// AT1G55670 // AT4G04640 // AT5G66570 // AT4G03280 // AT2G46820
GO:0016053	P	organic acid biosynthetic process	14	698	417	37767	0.027	0.35	// AT5G38020 // AT1G05800 // AT5G42650 // AT5G60890 // AT2G36880 // AT4G18780 // AT2G39800 // AT3G03780 // AT3G17390 // AT2G29980 // AT3G25780 // AT5G10330 // AT5G57800 // AT1G72520
GO:0046394	P	carboxylic acid biosynthetic process	14	698	417	37767	0.027	0.35	// AT5G38020 // AT1G05800 // AT5G42650 // AT5G60890 // AT2G36880 // AT4G18780 // AT2G39800 // AT3G03780 // AT3G17390 // AT2G29980 // AT3G25780 // AT5G10330 // AT5G57800 // AT1G72520
GO:0006631	P	fatty acid metabolic process	9	698	225	37767	0.028	0.35	// AT5G38020 // AT5G07010 // AT1G05800 // AT5G42650 // AT1G01600 // AT2G29980 // AT3G25780 // AT5G57800 // AT1G72520
GO:0016209	F	antioxidant activity	7	698	150	37767	0.025	0.35	// AT5G05340 // AT2G37130 // AT3G49120 // AT2G38380 // AT1G14550 // AT1G44970 // AT2G34060
GO:0044459	C	plasma membrane part	9	698	222	37767	0.026	0.36	// AT3G45780 // AT4G27520 // AT1G64760 // AT5G58480 // AT3G15720 // AT1G17840 // AT1G10550 // AT5G23730 // AT5G15350
GO:0018130	P	heterocycle biosynthetic process	6	698	123	37767	0.031	0.38	// AT1G58290 // AT5G26030 // AT4G14690 // AT5G60890 // AT2G39800 // AT5G10330
GO:0000160	P	two-component signal transduction system (phosphorelay)	5	698	92	37767	0.032	0.39	// AT2G44840 // AT5G62920 // AT4G18780 // AT1G19050 // AT5G44030
GO:0033692	P	cellular polysaccharide biosynthetic process	5	698	92	37767	0.032	0.39	// AT5G04360 // AT4G18780 // AT3G62720 // AT5G44030 // AT5G17420
GO:0044275	P	cellular carbohydrate catabolic process	6	698	125	37767	0.033	0.39	// AT3G44320 // AT1G12900 // AT5G25980 // AT4G17090 // AT5G26000 // AT5G04360
GO:0009416	P	response to light stimulus	18	698	596	37767	0.033	0.4	// AT3G45780 // AT1G58290 // AT3G49120 // AT5G66570 // AT4G14690 // AT4G38620 // AT3G15540 // AT5G44110 // AT1G20340 // AT3G48100 // AT5G37770 // AT4G03280 // AT4G19230 // AT3G17609 // AT1G80730 // AT4G31820 // AT3G59220 // AT1G01470
GO:0006351	P	transcription, DNA-dependent	28	698	1039	37767	0.035	0.41	// AT5G49520 // AT3G50060 // AT3G24310 // AT1G32640 // AT3G61890 // AT2G44840 // AT2G23290 // AT5G51990 // AT1G44830 // AT4G32800 // AT1G74930 // AT4G25480 // AT1G33760 // AT4G26370 // AT4G37780 // AT5G53290 // AT4G25470 // AT3G17609 // AT4G34410 // AT1G21910 // AT3G03260 // AT1G77640 // AT4G31800 // AT4G07950 // AT4G16141 // AT2G22850 // AT4G34990 // AT4G37260
GO:0032774	P	RNA biosynthetic process	28	698	1040	37767	0.035	0.41	// AT5G49520 // AT3G50060 // AT3G24310 // AT1G32640 // AT3G61890 // AT2G44840 // AT2G23290 // AT5G51990 // AT1G44830 // AT4G32800 // AT1G74930 // AT4G25480 // AT1G33760 // AT4G26370 // AT4G37780 // AT5G53290 // AT4G25470 // AT3G17609 // AT4G34410 // AT1G21910 // AT3G03260 // AT1G77640 // AT4G31800 // AT4G07950 // AT4G16141 // AT2G22850 // AT4G34990 // AT4G37260
GO:0051726	P	regulation of cell cycle	6	698	127	37767	0.035	0.41	// AT2G45080 // AT3G60550 // AT3G11520 // AT2G26760 // AT1G76310 // AT1G77390
GO:0008610	P	lipid biosynthetic process	14	698	439	37767	0.039	0.45	// AT5G38020 // AT1G05800 // AT5G42650 // AT4G18780 // AT2G45400 // AT4G37760 // AT3G18000 // AT5G14700 // AT2G29980 // AT3G25780 // AT3G53130 // AT5G57800 // AT1G72520 // AT5G48010
GO:0004497	F	monooxygenase activity	6	698	127	37767	0.035	0.45	// AT3G61750 // AT1G62540 // AT1G01600 // AT4G37760 // AT4G19230 // AT1G12140
GO:0005506	F	iron ion binding	7	698	161	37767	0.034	0.45	// AT5G05340 // AT2G37130 // AT2G38380 // AT1G14550 // AT1G44970 // AT2G34060 // AT1G72520
GO:0016829	F	lyase activity	14	698	430	37767	0.034	0.45	// AT5G26030 // AT3G09540 // AT2G16500 // AT5G42650 // AT1G08080 // AT3G44320 // AT4G16700 // AT4G37770 // AT3G57020 // AT4G08040 // AT4G34710 // AT2G28210 // AT3G57010 // AT3G27400
GO:0034357	C	photosynthetic membrane	10	698	273	37767	0.035	0.46	// AT4G04640 // AT5G66570 // AT1G31330 // AT3G15520 // AT4G03280 // AT3G18890 // AT3G61470 // AT4G12800 // AT2G46820 // AT1G55670
GO:0009733	P	response to auxin stimulus	12	698	360	37767	0.041	0.47	// AT3G12830 // AT2G14960 // AT4G38620 // AT3G16350 // AT4G37260 // AT3G15540 // AT3G47600 // AT1G77690 // AT5G37770 // AT5G57560 // AT1G17345 // AT4G34760
GO:0009314	P	response to radiation	18	698	613	37767	0.041	0.47	// AT3G45780 // AT1G58290 // AT3G49120 // AT5G66570 // AT4G14690 // AT4G38620 // AT3G15540 // AT5G44110 // AT1G20340 // AT3G48100 // AT5G37770 // AT4G03280 // AT4G19230 // AT3G17609 // AT1G80730 // AT4G31820 // AT3G59220 // AT1G01470
GO:0032989	P	cellular component morphogenesis	10	698	289	37767	0.048	0.54	// AT4G17030 // AT3G45970 // AT3G49120 // AT2G28950 // AT4G38400 // AT3G45960 // AT3G18000 // AT5G54380 // AT1G26770 // AT3G15370
GO:0019825	F	oxygen binding	9	698	255	37767	0.053	0.66	// AT4G31940 // AT4G37410 // AT5G42650 // AT5G38450 // AT1G01600 // AT2G34490 // AT3G48520 // AT4G19230 // AT3G53130
GO:0009579	C	thylakoid	12	698	376	37767	0.053	0.66	// AT3G47860 // AT4G04640 // AT5G66570 // AT1G31330 // AT3G15520 // AT1G20340 // AT4G03280 // AT3G18890 // AT3G61470 // AT4G12800 // AT2G46820 // AT1G55670
GO:0000271	P	polysaccharide biosynthetic process	5	698	112	37767	0.062	0.7	// AT5G04360 // AT4G18780 // AT3G62720 // AT5G44030 // AT5G17420
GO:0048869	P	cellular developmental process	15	698	520	37767	0.066	0.73	// AT4G17030 // AT3G45970 // AT3G49120 // AT2G28950 // AT4G38400 // AT3G62720 // AT3G45960 // AT3G18000 // AT1G19050 // AT5G54380 // AT2G22860 // AT1G26770 // AT5G57800 // AT3G15370 // AT4G35350
GO:0048856	P	anatomical structure development	41	698	1726	37767	0.066	0.73	// AT3G61590 // AT3G50060 // AT3G49120 // AT1G63030 // AT2G28950 // AT1G71930 // AT2G39800 // AT5G64530 // AT3G45640 // AT3G63440 // AT1G01030 // AT5G48010 // AT3G45970 // AT1G26770 // AT2G46870 // AT1G12610 // AT1G77690 // AT5G37770 // AT5G01040 // AT2G22860 // AT1G19180 // AT5G53290 // AT4G01540 // AT4G38400 // AT3G62720 // AT1G75520 // AT5G05950 // AT5G54380 // AT4G19230 // AT4G31820 // AT3G15…
GO:0009309	P	amine biosynthetic process	8	698	229	37767	0.069	0.75	// AT4G34710 // AT5G60890 // AT2G36880 // AT3G18000 // AT2G39800 // AT3G03780 // AT3G17390 // AT5G10330
GO:0065009	P	regulation of molecular function	6	698	153	37767	0.071	0.76	// AT3G45780 // AT1G32640 // AT2G05920 // AT1G32970 // AT3G45640 // AT5G63770
GO:0009755	P	hormone-mediated signaling pathway	10	698	321	37767	0.082	0.87	// AT5G15230 // AT4G01540 // AT3G48100 // AT4G18780 // AT5G44030 // AT2G44840 // AT1G19050 // AT5G54380 // AT3G45640 // AT5G62920
GO:0032870	P	cellular response to hormone stimulus	10	698	321	37767	0.082	0.87	// AT5G15230 // AT4G01540 // AT3G48100 // AT4G18780 // AT5G44030 // AT2G44840 // AT1G19050 // AT5G54380 // AT3G45640 // AT5G62920
GO:0008168	F	methyltransferase activity	9	698	273	37767	0.073	0.9	// AT3G44860 // AT1G76790 // AT5G38020 // AT5G56300 // AT3G18000 // AT5G54400 // AT3G03780 // AT5G37990 // AT3G44870
GO:0016741	F	transferase activity, transferring one-carbon groups	9	698	275	37767	0.076	0.9	// AT3G44860 // AT1G76790 // AT5G38020 // AT5G56300 // AT3G18000 // AT5G54400 // AT3G03780 // AT5G37990 // AT3G44870
GO:0008152	P	metabolic process	213	698	10614	37767	0.087	0.92	// AT1G58290 // AT3G50060 // AT3G61580 // AT2G41890 // AT1G01300 // AT4G14690 // AT1G29930 // AT3G44320 // AT4G01950 // AT5G07010 // AT3G16370 // AT5G54400 // AT3G61750 // AT4G03280 // AT3G57010 // AT1G12990 // AT3G63440 // AT5G43650 // AT2G17650 // AT2G24130 // AT1G05800 // AT1G56670 // AT5G19100 // AT5G58480 // AT1G12900 // AT4G25480 // AT1G74500 // AT1G78940 // AT1G09350 // AT4G37780 // AT5G23…
GO:0055114	P	oxidation reduction	7	698	203	37767	0.089	0.94	// AT5G66570 // AT4G04640 // AT4G03280 // AT2G46820 // AT1G55670 // AT1G04420 // AT1G64710
GO:0030246	F	carbohydrate binding	6	698	162	37767	0.087	0.98	// AT2G41890 // AT5G18470 // AT3G01260 // AT2G43620 // AT3G16530 // AT1G65390
GO:0005215	F	transporter activity	35	698	1477	37767	0.086	0.98	// AT5G63850 // AT5G44110 // AT1G16370 // AT1G61890 // AT5G45105 // AT3G45680 // AT1G77380 // AT4G21680 // AT1G22710 // AT3G54820 // AT5G15410 // AT3G10290 // AT5G52000 // AT1G19770 // AT2G38060 // AT5G48485 // AT1G71880 // AT3G16240 // AT3G47960 // AT4G27730 // AT4G13420 // AT1G72140 // AT1G77690 // AT1G12500 // AT2G27810 // AT5G17700 // AT3G45060 // AT1G22570 // AT2G39450 // AT4G18050 // AT1G17…
GO:0016835	F	carbon-oxygen lyase activity	6	698	163	37767	0.088	0.98	// AT3G09540 // AT5G42650 // AT1G08080 // AT3G44320 // AT2G28210 // AT3G27400
GO:0033036	P	macromolecule localization	13	698	462	37767	0.095	0.99	// AT2G38530 // AT3G22120 // AT2G38540 // AT5G53290 // AT5G48485 // AT5G46330 // AT5G52000 // AT1G17840 // AT1G12090 // AT2G44300 // AT4G22610 // AT5G01870 // AT4G31820
GO:0022622	P	root system development	6	698	255	37767	0.34	1	// AT3G50060 // AT3G62720 // AT1G77690 // AT2G39800 // AT5G63770 // AT5G48010
GO:0022621	P	shoot system development	8	698	358	37767	0.35	1	// AT5G53290 // AT2G46870 // AT4G01540 // AT5G64530 // AT3G63440 // AT1G01030 // AT4G31820 // AT5G63770
GO:0034645	P	cellular macromolecule biosynthetic process	61	698	3661	37767	0.82	1	// AT5G49520 // AT3G50060 // AT4G38620 // AT3G25660 // AT3G24310 // AT1G12990 // AT1G32640 // AT3G61890 // AT3G16350 // AT5G44030 // AT5G15760 // AT4G34410 // AT2G44840 // AT2G23290 // AT3G55980 // AT2G22760 // AT5G51990 // AT1G01030 // AT4G39070 // AT4G07950 // AT5G04360 // AT4G32800 // AT1G62975 // AT1G76720 // AT5G43650 // AT1G74930 // AT4G25480 // AT1G33760 // AT1G18400 // AT1G74500 // AT5G24…
GO:0007165	P	signal transduction	24	698	1228	37767	0.42	1	// AT5G15230 // AT5G06870 // AT2G26380 // AT1G32640 // AT2G34930 // AT4G20940 // AT5G44030 // AT2G44840 // AT3G45640 // AT2G20142 // AT4G18510 // AT2G19780 // AT4G12720 // AT1G71400 // AT5G15410 // AT3G48100 // AT5G37770 // AT1G19050 // AT1G19180 // AT1G61840 // AT4G01540 // AT5G54380 // AT4G18780 // AT5G62920
GO:0007166	P	cell surface receptor linked signaling pathway	5	698	172	37767	0.22	1	// AT2G24130 // AT3G45640 // AT5G46330 // AT1G78280 // AT5G63770
GO:0009698	P	phenylpropanoid metabolic process	6	698	175	37767	0.11	1	// AT1G32640 // AT2G45400 // AT5G08640 // AT5G14700 // AT3G17390 // AT2G22990
GO:0009699	P	phenylpropanoid biosynthetic process	5	698	141	37767	0.13	1	// AT5G08640 // AT2G45400 // AT5G14700 // AT3G17390 // AT1G32640
GO:0051716	P	cellular response to stimulus	19	698	840	37767	0.22	1	// AT4G17760 // AT5G15230 // AT4G18780 // AT1G32640 // AT4G01540 // AT3G48100 // AT3G44320 // AT5G46330 // AT5G44030 // AT5G15410 // AT4G12720 // AT1G66270 // AT2G44840 // AT1G19050 // AT5G54380 // AT3G45640 // AT5G62920 // AT1G19180 // AT5G60890
GO:0000003	P	reproduction	20	698	1186	37767	0.69	1	// AT5G53290 // AT4G31820 // AT2G46870 // AT2G16500 // AT1G01470 // AT3G45640 // AT4G00080 // AT1G75520 // AT1G71880 // AT2G41890 // AT5G37770 // AT5G10330 // AT4G34710 // AT5G01040 // AT4G19230 // AT5G05950 // AT1G01030 // AT1G19180 // AT5G57800 // AT2G21540
GO:0016310	P	phosphorylation	21	698	1079	37767	0.44	1	// AT2G24130 // AT5G25930 // AT2G41890 // AT5G24010 // AT5G40030 // AT1G09450 // AT4G04640 // AT5G46330 // AT3G45780 // AT2G43690 // AT2G33580 // AT1G56720 // AT1G51940 // AT5G54380 // AT3G45640 // AT1G76360 // AT2G05940 // AT1G78940 // AT5G48740 // AT3G59350 // AT5G63770
GO:0048518	P	positive regulation of biological process	5	698	259	37767	0.52	1	// AT3G61890 // AT4G12720 // AT4G31820 // AT1G32640 // AT4G18780
GO:0048519	P	negative regulation of biological process	7	698	442	37767	0.71	1	// AT3G45780 // AT1G05800 // AT5G66570 // AT4G38620 // AT1G20340 // AT1G19050 // AT1G66783
GO:0046483	P	heterocycle metabolic process	10	698	460	37767	0.35	1	// AT1G58290 // AT5G26030 // AT3G61750 // AT4G14690 // AT5G60890 // AT4G04640 // AT2G39800 // AT3G45640 // AT3G63440 // AT5G10330
GO:0032787	P	monocarboxylic acid metabolic process	11	698	408	37767	0.14	1	// AT5G38020 // AT5G07010 // AT1G05800 // AT5G42650 // AT1G01600 // AT4G18780 // AT3G25780 // AT2G29980 // AT4G19230 // AT5G57800 // AT1G72520
GO:0003006	P	reproductive developmental process	16	698	978	37767	0.72	1	// AT5G53290 // AT1G19180 // AT2G46870 // AT2G16500 // AT1G01470 // AT3G45640 // AT1G75520 // AT5G37770 // AT5G10330 // AT4G34710 // AT5G01040 // AT4G19230 // AT5G05950 // AT1G01030 // AT4G31820 // AT2G21540
GO:0043436	P	oxoacid metabolic process	21	698	859	37767	0.13	1	// AT3G61750 // AT5G38020 // AT5G07010 // AT1G05800 // AT5G42650 // AT4G08040 // AT1G69040 // AT1G01600 // AT2G36880 // AT4G18780 // AT4G37770 // AT3G25780 // AT2G39800 // AT3G03780 // AT3G17390 // AT2G29980 // AT4G19230 // AT5G10330 // AT5G57800 // AT1G72520 // AT5G60890
GO:0048513	P	organ development	19	698	838	37767	0.22	1	// AT3G50060 // AT3G61590 // AT2G46870 // AT1G63030 // AT5G53290 // AT4G01540 // AT1G12610 // AT3G62720 // AT1G77690 // AT1G71930 // AT2G22860 // AT2G39800 // AT5G64530 // AT3G45640 // AT3G63440 // AT1G01030 // AT4G31820 // AT5G63770 // AT5G48010
GO:0044249	P	cellular biosynthetic process	96	698	4925	37767	0.31	1	// AT1G58290 // AT3G50060 // AT3G24310 // AT4G14690 // AT3G57010 // AT5G43650 // AT1G05800 // AT4G25480 // AT1G74500 // AT4G37780 // AT5G23280 // AT3G17609 // AT4G25470 // AT1G21910 // AT1G12140 // AT1G20340 // AT3G18000 // AT5G49520 // AT2G46510 // AT4G34990 // AT1G19040 // AT5G43270 // AT5G24930 // AT4G37260 // AT5G26030 // AT4G04640 // AT5G15760 // AT2G39800 // AT5G51990 // AT3G53130 // AT5G48…
GO:0019538	P	protein metabolic process	51	698	4009	37767	1	1	// AT1G32970 // AT2G41890 // AT1G01300 // AT1G12990 // AT5G19100 // AT2G05920 // AT5G46330 // AT3G06778 // AT2G43690 // AT1G76360 // AT4G16563 // AT3G45640 // AT2G05940 // AT3G59350 // AT2G24130 // AT2G39710 // AT5G66570 // AT5G19110 // AT2G21510 // AT4G35350 // AT3G43960 // AT1G78940 // AT5G25930 // AT3G45780 // AT1G51940 // AT2G47440 // AT1G76720 // AT3G27540 // AT5G40030 // AT5G54380 // AT2G33…
GO:0002376	P	immune system process	8	698	368	37767	0.37	1	// AT4G31800 // AT5G64900 // AT2G35930 // AT5G15410 // AT4G12720 // AT5G45110 // AT5G37770 // AT2G20142
GO:0007154	P	cell communication	6	698	1399	37767	1	1	// AT2G41890 // AT5G60890 // AT3G44320 // AT1G66270 // AT3G45640 // AT3G23805
GO:0033554	P	cellular response to stress	9	698	399	37767	0.32	1	// AT1G66270 // AT1G32640 // AT4G12720 // AT5G60890 // AT3G44320 // AT5G46330 // AT5G15410 // AT4G17760 // AT3G45640
GO:0019438	P	aromatic compound biosynthetic process	7	698	237	37767	0.16	1	// AT1G32640 // AT5G60890 // AT2G45400 // AT5G14700 // AT5G08640 // AT3G17390 // AT3G45640
GO:0006807	P	nitrogen compound metabolic process	76	698	3826	37767	0.27	1	// AT1G58290 // AT3G50060 // AT4G38620 // AT3G61750 // AT3G24310 // AT4G14690 // AT5G26030 // AT3G61890 // AT3G16350 // AT3G45640 // AT1G69040 // AT5G60890 // AT3G57020 // AT4G34410 // AT2G39800 // AT1G01030 // AT2G23290 // AT3G17390 // AT3G17609 // AT3G63440 // AT2G22760 // AT5G43650 // AT1G19040 // AT4G39070 // AT4G07950 // AT2G46510 // AT4G32800 // AT1G62975 // AT5G51990 // AT1G32640 // AT4G30…
GO:0044267	P	cellular protein metabolic process	36	698	3487	37767	1	1	// AT2G41890 // AT1G12990 // AT5G46330 // AT3G06778 // AT2G43690 // AT1G76360 // AT3G45640 // AT2G05940 // AT3G59350 // AT2G24130 // AT5G24010 // AT5G66570 // AT2G21510 // AT1G78940 // AT5G25930 // AT3G45780 // AT1G51940 // AT2G47440 // AT3G27540 // AT5G40030 // AT5G54380 // AT2G33580 // AT1G23410 // AT5G15760 // AT1G37150 // AT4G36410 // AT1G24330 // AT3G25660 // AT1G09450 // AT2G35930 // AT1G20…
GO:0044265	P	cellular macromolecule catabolic process	9	698	465	37767	0.49	1	// AT4G36410 // AT1G23410 // AT4G21590 // AT3G44320 // AT1G12900 // AT5G25980 // AT4G17090 // AT5G26000 // AT5G04360
GO:0044260	P	cellular macromolecule metabolic process	99	698	6447	37767	0.98	1	// AT5G49520 // AT3G50060 // AT2G41890 // AT3G24310 // AT3G44320 // AT5G43650 // AT2G24130 // AT1G12900 // AT4G25480 // AT1G74500 // AT1G78940 // AT4G37780 // AT5G23280 // AT2G47440 // AT5G54380 // AT3G17609 // AT4G25470 // AT1G21910 // AT1G24330 // AT1G09450 // AT1G20340 // AT2G22850 // AT4G33920 // AT2G46510 // AT4G34990 // AT1G19040 // AT5G43270 // AT5G24930 // AT4G37260 // AT5G53290 // AT3G06…
GO:0016043	P	cellular component organization	15	698	1179	37767	0.95	1	// AT3G05470 // AT4G17030 // AT3G45960 // AT5G66570 // AT3G45970 // AT3G12110 // AT4G38400 // AT2G28950 // AT3G45780 // AT3G49120 // AT3G18000 // AT5G54380 // AT1G26770 // AT1G75100 // AT3G15370
GO:0048316	P	seed development	8	698	530	37767	0.76	1	// AT5G53290 // AT5G10330 // AT2G16500 // AT1G01470 // AT4G34710 // AT4G19230 // AT5G05950 // AT4G31820
GO:0009308	P	amine metabolic process	14	698	521	37767	0.11	1	// AT1G69040 // AT3G61750 // AT4G34710 // AT5G60890 // AT2G36880 // AT1G31710 // AT4G37770 // AT3G18000 // AT4G08040 // AT2G39800 // AT3G03780 // AT3G17390 // AT3G63440 // AT5G10330
GO:0050793	P	regulation of developmental process	5	698	377	37767	0.82	1	// AT1G12610 // AT4G31820 // AT5G54380 // AT1G63030 // AT1G19050
GO:0006812	P	cation transport	6	698	357	37767	0.65	1	// AT3G45780 // AT4G13420 // AT4G04640 // AT2G39450 // AT5G45105 // AT1G51090
GO:0006811	P	ion transport	6	698	427	37767	0.8	1	// AT3G45780 // AT4G13420 // AT4G04640 // AT2G39450 // AT5G45105 // AT1G51090
GO:0006810	P	transport	38	698	1846	37767	0.27	1	// AT2G38530 // AT3G22120 // AT4G04640 // AT5G63850 // AT1G61890 // AT5G45105 // AT3G45680 // AT1G77380 // AT4G21680 // AT1G22710 // AT3G54820 // AT5G52000 // AT1G19770 // AT2G44300 // AT5G48485 // AT1G12090 // AT3G16240 // AT3G47960 // AT4G27730 // AT5G53290 // AT3G45780 // AT2G38540 // AT4G13420 // AT1G72140 // AT1G77690 // AT2G27810 // AT4G22610 // AT5G01870 // AT4G31820 // AT1G51090 // AT1G22…
GO:0009888	P	tissue development	5	698	359	37767	0.79	1	// AT1G71930 // AT1G12610 // AT3G62720 // AT1G63030 // AT5G64530
GO:0043412	P	macromolecule modification	28	698	1636	37767	0.69	1	// AT2G41890 // AT1G12990 // AT5G46330 // AT2G43690 // AT1G76360 // AT3G45640 // AT2G05940 // AT3G59350 // AT2G24130 // AT5G66570 // AT1G78940 // AT5G25930 // AT3G45780 // AT1G51940 // AT3G27540 // AT5G40030 // AT5G54380 // AT2G33580 // AT1G23410 // AT1G37150 // AT1G24330 // AT5G24010 // AT1G09450 // AT2G35930 // AT4G33920 // AT1G56720 // AT5G65920 // AT5G48740
GO:0051234	P	establishment of localization	39	698	1851	37767	0.23	1	// AT2G38530 // AT3G22120 // AT4G04640 // AT5G63850 // AT1G61890 // AT5G45105 // AT3G45680 // AT1G77380 // AT4G21680 // AT1G22710 // AT3G54820 // AT1G75100 // AT5G52000 // AT1G19770 // AT2G44300 // AT5G48485 // AT1G12090 // AT3G16240 // AT3G47960 // AT4G27730 // AT5G53290 // AT3G45780 // AT2G38540 // AT4G13420 // AT1G72140 // AT1G77690 // AT2G27810 // AT4G22610 // AT5G01870 // AT4G31820 // AT1G51…
GO:0006520	P	cellular amino acid metabolic process	10	698	430	37767	0.28	1	// AT1G69040 // AT3G61750 // AT5G60890 // AT2G36880 // AT4G37770 // AT4G08040 // AT2G39800 // AT3G03780 // AT3G17390 // AT5G10330
GO:0008652	P	cellular amino acid biosynthetic process	6	698	202	37767	0.18	1	// AT5G60890 // AT2G36880 // AT2G39800 // AT3G03780 // AT3G17390 // AT5G10330
GO:0010154	P	fruit development	8	698	557	37767	0.81	1	// AT5G53290 // AT5G10330 // AT2G16500 // AT1G01470 // AT4G34710 // AT4G19230 // AT5G05950 // AT4G31820
GO:0048367	P	shoot development	8	698	355	37767	0.34	1	// AT5G53290 // AT2G46870 // AT4G01540 // AT5G64530 // AT3G63440 // AT1G01030 // AT4G31820 // AT5G63770
GO:0048364	P	root development	6	698	255	37767	0.34	1	// AT3G50060 // AT3G62720 // AT1G77690 // AT2G39800 // AT5G63770 // AT5G48010
GO:0006519	P	cellular amino acid and derivative metabolic process	17	698	682	37767	0.14	1	// AT1G69040 // AT3G61750 // AT4G34710 // AT1G32640 // AT5G60890 // AT2G36880 // AT2G45400 // AT4G37770 // AT5G14700 // AT3G18000 // AT4G08040 // AT2G39800 // AT3G03780 // AT5G08640 // AT3G17390 // AT2G22990 // AT5G10330
GO:0030154	P	cell differentiation	5	698	355	37767	0.78	1	// AT2G22860 // AT3G62720 // AT5G57800 // AT1G19050 // AT4G35350
GO:0016070	P	RNA metabolic process	28	698	1657	37767	0.71	1	// AT5G49520 // AT3G50060 // AT3G24310 // AT1G32640 // AT3G61890 // AT2G44840 // AT2G23290 // AT5G51990 // AT1G44830 // AT4G32800 // AT1G74930 // AT4G25480 // AT1G33760 // AT4G26370 // AT4G37780 // AT5G53290 // AT4G25470 // AT3G17609 // AT4G34410 // AT1G21910 // AT3G03260 // AT1G77640 // AT4G31800 // AT4G07950 // AT4G16141 // AT2G22850 // AT4G34990 // AT4G37260
GO:0009790	P	embryonic development	5	698	535	37767	0.97	1	// AT5G05950 // AT1G01470 // AT4G31820 // AT5G10330 // AT5G53290
GO:0009793	P	embryonic development ending in seed dormancy	5	698	465	37767	0.93	1	// AT5G05950 // AT1G01470 // AT4G31820 // AT5G10330 // AT5G53290
GO:0070887	P	cellular response to chemical stimulus	12	698	452	37767	0.14	1	// AT5G15230 // AT1G32640 // AT4G01540 // AT3G48100 // AT4G18780 // AT5G44030 // AT2G44840 // AT1G19050 // AT5G54380 // AT3G45640 // AT5G62920 // AT1G19180
GO:0009653	P	anatomical structure morphogenesis	15	698	637	37767	0.21	1	// AT4G17030 // AT3G45970 // AT3G45960 // AT2G28950 // AT4G01540 // AT4G38400 // AT3G62720 // AT3G49120 // AT3G18000 // AT5G54380 // AT2G22860 // AT3G63440 // AT1G77690 // AT3G15370 // AT1G26770
GO:0007049	P	cell cycle	6	698	275	37767	0.4	1	// AT2G45080 // AT3G60550 // AT3G11520 // AT2G26760 // AT1G76310 // AT1G77390
GO:0006139	P	nucleobase, nucleoside, nucleotide and nucleic acid metabolic process	58	698	3198	37767	0.58	1	// AT5G49520 // AT3G50060 // AT4G38620 // AT3G24310 // AT1G32640 // AT3G61890 // AT3G16350 // AT4G04640 // AT4G34410 // AT2G44840 // AT2G23290 // AT3G17390 // AT3G55980 // AT2G22760 // AT5G43650 // AT1G01030 // AT4G39070 // AT4G07950 // AT4G32800 // AT1G62975 // AT5G51990 // AT4G30440 // AT1G74930 // AT4G25480 // AT1G33760 // AT1G18400 // AT1G74500 // AT1G55670 // AT4G26370 // AT4G37780 // AT5G23…
GO:0051641	P	cellular localization	7	698	569	37767	0.9	1	// AT5G53290 // AT3G45780 // AT5G46330 // AT1G75100 // AT5G52000 // AT5G59730 // AT2G22500
GO:0051179	P	localization	40	698	1922	37767	0.25	1	// AT2G38530 // AT3G22120 // AT4G04640 // AT5G63850 // AT1G61890 // AT5G45105 // AT3G45680 // AT1G77380 // AT4G21680 // AT1G22710 // AT3G54820 // AT1G75100 // AT5G52000 // AT1G19770 // AT2G44300 // AT5G48485 // AT1G12090 // AT3G16240 // AT3G47960 // AT4G27730 // AT5G53290 // AT3G45780 // AT2G38540 // AT4G13420 // AT1G72140 // AT1G77690 // AT2G27810 // AT4G22610 // AT5G01870 // AT4G31820 // AT1G51…
GO:0048827	P	phyllome development	6	698	258	37767	0.35	1	// AT5G53290 // AT2G46870 // AT4G01540 // AT1G01030 // AT4G31820 // AT5G63770
GO:0006508	P	proteolysis	17	698	810	37767	0.33	1	// AT1G32970 // AT2G39710 // AT1G01300 // AT5G19100 // AT2G05920 // AT5G42240 // AT1G23410 // AT4G36410 // AT3G25700 // AT3G43960 // AT5G10770 // AT4G35350 // AT4G16563 // AT5G19110 // AT5G07030 // AT2G22990 // AT3G48350
GO:0032502	P	developmental process	51	698	2304	37767	0.11	1	// AT3G61590 // AT3G50060 // AT3G49120 // AT1G63030 // AT2G28950 // AT1G71930 // AT4G16750 // AT2G39800 // AT5G64530 // AT3G45640 // AT3G63440 // AT1G01030 // AT5G48010 // AT3G45970 // AT1G26770 // AT4G18010 // AT2G46870 // AT1G80730 // AT1G12610 // AT4G27410 // AT1G77690 // AT5G37770 // AT1G19050 // AT5G01040 // AT2G22860 // AT1G19180 // AT4G35350 // AT5G53290 // AT4G01540 // AT5G24770 // AT4G38…
GO:0032501	P	multicellular organismal process	41	698	2094	37767	0.38	1	// AT3G50060 // AT2G41890 // AT1G63030 // AT3G61590 // AT1G71930 // AT4G16750 // AT2G39800 // AT5G64530 // AT3G45640 // AT3G63440 // AT1G01030 // AT5G48010 // AT4G31820 // AT2G46870 // AT1G80730 // AT1G12610 // AT4G27410 // AT1G77690 // AT5G37770 // AT5G01040 // AT2G22860 // AT5G10330 // AT5G53290 // AT3G45780 // AT4G01540 // AT3G62720 // AT1G75520 // AT5G05950 // AT5G54380 // AT4G19230 // AT4G18…
GO:0048608	P	reproductive structure development	16	698	978	37767	0.72	1	// AT5G53290 // AT1G19180 // AT2G46870 // AT2G16500 // AT1G01470 // AT3G45640 // AT1G75520 // AT5G37770 // AT5G10330 // AT4G34710 // AT5G01040 // AT4G19230 // AT5G05950 // AT1G01030 // AT4G31820 // AT2G21540
GO:0044238	P	primary metabolic process	179	698	8995	37767	0.14	1	// AT5G49520 // AT3G50060 // AT3G61580 // AT2G41890 // AT1G01300 // AT5G19100 // AT3G44320 // AT5G07010 // AT3G16370 // AT3G61750 // AT1G12990 // AT3G24310 // AT5G43650 // AT2G24130 // AT1G05800 // AT1G56670 // AT5G58480 // AT1G12900 // AT4G25480 // AT1G74500 // AT1G78940 // AT1G09350 // AT4G37780 // AT5G23280 // AT5G45670 // AT3G50760 // AT1G02660 // AT3G23820 // AT5G54380 // AT4G19230 // AT3G17…
GO:0043687	P	post-translational protein modification	25	698	1248	37767	0.37	1	// AT2G41890 // AT5G46330 // AT2G43690 // AT1G76360 // AT3G45640 // AT2G05940 // AT3G59350 // AT2G24130 // AT5G66570 // AT1G78940 // AT5G25930 // AT3G45780 // AT1G51940 // AT5G40030 // AT5G54380 // AT2G33580 // AT1G23410 // AT1G24330 // AT5G24010 // AT1G09450 // AT2G35930 // AT4G33920 // AT1G56720 // AT5G65920 // AT5G48740
GO:0009987	P	cellular process	215	698	11684	37767	0.54	1	// AT3G05470 // AT3G50060 // AT5G07010 // AT2G41890 // AT3G24310 // AT4G14690 // AT1G29930 // AT2G34930 // AT3G44320 // AT2G28210 // AT5G06870 // AT4G03280 // AT3G57010 // AT1G12990 // AT3G63440 // AT2G20142 // AT3G59350 // AT1G76310 // AT3G23810 // AT2G24130 // AT4G18510 // AT1G05800 // AT2G19780 // AT3G12110 // AT1G75100 // AT1G12900 // AT4G25480 // AT3G44990 // AT1G19050 // AT1G74500 // AT5G37…
GO:0006725	P	cellular aromatic compound metabolic process	10	698	399	37767	0.21	1	// AT2G22990 // AT5G60890 // AT2G36880 // AT1G32640 // AT2G45400 // AT5G14700 // AT5G08640 // AT3G17390 // AT3G45640 // AT3G63440
GO:0006955	P	immune response	8	698	367	37767	0.37	1	// AT4G31800 // AT5G64900 // AT2G35930 // AT5G15410 // AT4G12720 // AT5G45110 // AT5G37770 // AT2G20142
GO:0044255	P	cellular lipid metabolic process	15	698	618	37767	0.18	1	// AT5G38020 // AT5G07010 // AT1G05800 // AT5G42650 // AT1G01600 // AT4G18780 // AT3G18000 // AT3G07960 // AT3G25780 // AT2G29980 // AT4G19230 // AT3G53130 // AT5G57800 // AT1G72520 // AT5G48010
GO:0055086	P	nucleobase, nucleoside and nucleotide metabolic process	5	698	221	37767	0.39	1	// AT1G55670 // AT2G36880 // AT4G04640 // AT3G17390 // AT3G53900
GO:0042180	P	cellular ketone metabolic process	21	698	882	37767	0.15	1	// AT3G61750 // AT5G38020 // AT5G07010 // AT1G05800 // AT5G42650 // AT4G08040 // AT1G69040 // AT1G01600 // AT2G36880 // AT4G18780 // AT4G37770 // AT3G25780 // AT2G39800 // AT3G03780 // AT3G17390 // AT2G29980 // AT4G19230 // AT5G10330 // AT5G57800 // AT1G72520 // AT5G60890
GO:0006082	P	organic acid metabolic process	21	698	860	37767	0.13	1	// AT3G61750 // AT5G38020 // AT5G07010 // AT1G05800 // AT5G42650 // AT4G08040 // AT1G69040 // AT1G01600 // AT2G36880 // AT4G18780 // AT4G37770 // AT3G25780 // AT2G39800 // AT3G03780 // AT3G17390 // AT2G29980 // AT4G19230 // AT5G10330 // AT5G57800 // AT1G72520 // AT5G60890
GO:0007242	P	intracellular signaling cascade	16	698	659	37767	0.17	1	// AT5G15230 // AT1G32640 // AT4G01540 // AT3G48100 // AT4G18780 // AT5G44030 // AT5G15410 // AT4G12720 // AT1G61840 // AT2G44840 // AT5G37770 // AT1G19050 // AT5G54380 // AT3G45640 // AT5G62920 // AT1G19180
GO:0043170	P	macromolecule metabolic process	118	698	7127	37767	0.92	1	// AT5G49520 // AT3G50060 // AT2G41890 // AT1G01300 // AT5G19100 // AT3G44320 // AT3G24310 // AT5G43650 // AT2G24130 // AT1G12900 // AT4G25480 // AT1G74500 // AT1G78940 // AT4G37780 // AT5G23280 // AT2G47440 // AT5G54380 // AT3G17609 // AT4G25470 // AT1G21910 // AT1G24330 // AT1G09450 // AT1G20340 // AT2G22850 // AT4G33920 // AT2G46510 // AT4G34990 // AT1G19040 // AT2G22990 // AT5G43270 // AT5G24…
GO:0048731	P	system development	19	698	839	37767	0.22	1	// AT3G50060 // AT3G61590 // AT2G46870 // AT1G63030 // AT5G53290 // AT4G01540 // AT1G12610 // AT3G62720 // AT1G77690 // AT1G71930 // AT2G22860 // AT2G39800 // AT5G64530 // AT3G45640 // AT3G63440 // AT1G01030 // AT4G31820 // AT5G63770 // AT5G48010
GO:0019752	P	carboxylic acid metabolic process	21	698	859	37767	0.13	1	// AT3G61750 // AT5G38020 // AT5G07010 // AT1G05800 // AT5G42650 // AT4G08040 // AT1G69040 // AT1G01600 // AT2G36880 // AT4G18780 // AT4G37770 // AT3G25780 // AT2G39800 // AT3G03780 // AT3G17390 // AT2G29980 // AT4G19230 // AT5G10330 // AT5G57800 // AT1G72520 // AT5G60890
GO:0006091	P	generation of precursor metabolites and energy	8	698	285	37767	0.17	1	// AT5G66570 // AT4G04640 // AT1G12900 // AT3G61470 // AT4G03280 // AT4G12800 // AT2G46820 // AT1G55670
GO:0007275	P	multicellular organismal development	38	698	2020	37767	0.48	1	// AT3G50060 // AT1G63030 // AT3G61590 // AT1G71930 // AT4G16750 // AT2G39800 // AT5G64530 // AT3G45640 // AT3G63440 // AT1G01030 // AT5G48010 // AT4G18010 // AT2G46870 // AT1G80730 // AT1G12610 // AT4G27410 // AT1G77690 // AT5G37770 // AT5G01040 // AT2G22860 // AT1G19180 // AT5G53290 // AT4G01540 // AT3G62720 // AT1G75520 // AT5G05950 // AT5G54380 // AT4G19230 // AT4G31820 // AT1G18750 // AT5G10…
GO:0009639	P	response to red or far red light	5	698	210	37767	0.35	1	// AT4G19230 // AT1G80730 // AT3G48100 // AT4G14690 // AT5G44110
GO:0048366	P	leaf development	5	698	233	37767	0.43	1	// AT5G53290 // AT1G01030 // AT2G46870 // AT5G63770 // AT4G01540
GO:0010467	P	gene expression	56	698	3962	37767	0.99	1	// AT5G49520 // AT3G50060 // AT4G38620 // AT3G24310 // AT1G32640 // AT3G61890 // AT3G16350 // AT5G15760 // AT4G34410 // AT2G44840 // AT2G23290 // AT3G55980 // AT2G22760 // AT5G51990 // AT1G01030 // AT4G39070 // AT4G07950 // AT4G32800 // AT1G62975 // AT1G76720 // AT5G43650 // AT1G74930 // AT4G25480 // AT1G33760 // AT1G18400 // AT1G74500 // AT1G55670 // AT4G26370 // AT4G37780 // AT5G23280 // AT5G51…
GO:0044106	P	cellular amine metabolic process	12	698	438	37767	0.12	1	// AT1G69040 // AT3G61750 // AT4G34710 // AT5G60890 // AT2G36880 // AT4G37770 // AT3G18000 // AT4G08040 // AT2G39800 // AT3G03780 // AT3G17390 // AT5G10330
GO:0009908	P	flower development	7	698	377	37767	0.55	1	// AT1G19180 // AT2G46870 // AT1G75520 // AT3G45640 // AT1G01030 // AT4G31820 // AT2G21540
GO:0006468	P	protein amino acid phosphorylation	19	698	946	37767	0.39	1	// AT2G24130 // AT5G25930 // AT2G41890 // AT5G24010 // AT5G40030 // AT1G09450 // AT5G46330 // AT3G45780 // AT2G43690 // AT2G33580 // AT1G56720 // AT1G51940 // AT5G54380 // AT3G45640 // AT1G76360 // AT2G05940 // AT1G78940 // AT5G48740 // AT3G59350
GO:0045087	P	innate immune response	7	698	347	37767	0.46	1	// AT5G64900 // AT2G35930 // AT5G15410 // AT4G12720 // AT5G45110 // AT5G37770 // AT2G20142
GO:0006464	P	protein modification process	28	698	1474	37767	0.47	1	// AT2G41890 // AT1G12990 // AT5G46330 // AT2G43690 // AT1G76360 // AT3G45640 // AT2G05940 // AT3G59350 // AT2G24130 // AT5G66570 // AT1G78940 // AT5G25930 // AT3G45780 // AT1G51940 // AT3G27540 // AT5G40030 // AT5G54380 // AT2G33580 // AT1G23410 // AT1G37150 // AT1G24330 // AT5G24010 // AT1G09450 // AT2G35930 // AT4G33920 // AT1G56720 // AT5G65920 // AT5G48740
GO:0022414	P	reproductive process	20	698	1161	37767	0.66	1	// AT5G53290 // AT4G31820 // AT2G46870 // AT2G16500 // AT1G01470 // AT3G45640 // AT4G00080 // AT1G75520 // AT1G71880 // AT2G41890 // AT5G37770 // AT5G10330 // AT4G34710 // AT5G01040 // AT4G19230 // AT5G05950 // AT1G01030 // AT1G19180 // AT5G57800 // AT2G21540
GO:0009058	P	biosynthetic process	105	698	5118	37767	0.14	1	// AT1G58290 // AT3G50060 // AT3G24310 // AT4G14690 // AT3G57010 // AT5G43650 // AT1G05800 // AT4G25480 // AT1G74500 // AT1G09350 // AT4G37780 // AT5G23280 // AT3G50760 // AT3G17609 // AT4G25470 // AT1G21910 // AT1G12140 // AT1G20340 // AT3G18000 // AT5G49520 // AT2G46510 // AT4G34990 // AT1G19040 // AT5G43270 // AT1G72520 // AT4G37260 // AT5G26030 // AT4G02130 // AT4G04640 // AT5G15760 // AT2G39…
GO:0009059	P	macromolecule biosynthetic process	61	698	3685	37767	0.83	1	// AT5G49520 // AT3G50060 // AT4G38620 // AT3G25660 // AT3G24310 // AT1G12990 // AT1G32640 // AT3G61890 // AT3G16350 // AT5G44030 // AT5G15760 // AT4G34410 // AT2G44840 // AT2G23290 // AT3G55980 // AT2G22760 // AT5G51990 // AT1G01030 // AT4G39070 // AT4G07950 // AT5G04360 // AT4G32800 // AT1G62975 // AT1G76720 // AT5G43650 // AT1G74930 // AT4G25480 // AT1G33760 // AT1G18400 // AT1G74500 // AT5G24…
GO:0051649	P	establishment of localization in cell	6	698	525	37767	0.92	1	// AT5G53290 // AT3G45780 // AT1G75100 // AT5G52000 // AT5G59730 // AT2G22500
GO:0009056	P	catabolic process	17	698	1307	37767	0.95	1	// AT5G04360 // AT3G61750 // AT1G23410 // AT3G16920 // AT4G21590 // AT1G51940 // AT3G44320 // AT1G12900 // AT4G36410 // AT5G25980 // AT5G26000 // AT4G17090 // AT1G10370 // AT2G29440 // AT1G68560 // AT2G33580 // AT3G63440
GO:0009057	P	macromolecule catabolic process	10	698	982	37767	0.99	1	// AT4G36410 // AT1G23410 // AT4G21590 // AT3G44320 // AT1G12900 // AT5G25980 // AT4G17090 // AT5G04360 // AT5G26000 // AT1G68560
GO:0044248	P	cellular catabolic process	12	698	746	37767	0.72	1	// AT3G61750 // AT1G23410 // AT4G21590 // AT3G44320 // AT1G12900 // AT4G36410 // AT5G25980 // AT4G17090 // AT1G10370 // AT2G29440 // AT5G26000 // AT5G04360
GO:0044237	P	cellular metabolic process	162	698	8722	37767	0.49	1	// AT1G58290 // AT3G50060 // AT5G07010 // AT2G41890 // AT3G24310 // AT4G14690 // AT1G29930 // AT3G44320 // AT2G28210 // AT3G61750 // AT4G03280 // AT3G57010 // AT1G12990 // AT3G63440 // AT5G43650 // AT3G23810 // AT2G24130 // AT1G05800 // AT1G12900 // AT4G25480 // AT1G74500 // AT1G78940 // AT4G37780 // AT5G23280 // AT2G47440 // AT3G18890 // AT3G23820 // AT5G54380 // AT4G19230 // AT3G17609 // AT4G18…
GO:0006066	P	alcohol metabolic process	6	698	270	37767	0.39	1	// AT3G01260 // AT1G12900 // AT3G18000 // AT4G37760 // AT5G41080 // AT4G18010
GO:0006796	P	phosphate metabolic process	24	698	1178	37767	0.34	1	// AT2G41890 // AT4G04640 // AT5G46330 // AT2G43690 // AT1G76360 // AT3G45640 // AT2G05940 // AT3G59350 // AT2G24130 // AT5G66570 // AT1G78940 // AT5G25930 // AT3G45780 // AT1G51940 // AT5G40030 // AT5G54380 // AT2G33580 // AT4G18010 // AT5G24010 // AT1G09450 // AT4G33920 // AT1G56720 // AT5G48740 // AT5G63770
GO:0044085	P	cellular component biogenesis	6	698	571	37767	0.95	1	// AT5G66570 // AT3G44990 // AT4G18780 // AT5G44030 // AT1G32990 // AT5G17420
GO:0006793	P	phosphorus metabolic process	24	698	1179	37767	0.35	1	// AT2G41890 // AT4G04640 // AT5G46330 // AT2G43690 // AT1G76360 // AT3G45640 // AT2G05940 // AT3G59350 // AT2G24130 // AT5G66570 // AT1G78940 // AT5G25930 // AT3G45780 // AT1G51940 // AT5G40030 // AT5G54380 // AT2G33580 // AT4G18010 // AT5G24010 // AT1G09450 // AT4G33920 // AT1G56720 // AT5G48740 // AT5G63770
GO:0006412	P	translation	5	698	1445	37767	1	1	// AT1G76720 // AT3G25660 // AT1G23410 // AT1G20340 // AT5G15760
GO:0048523	P	negative regulation of cellular process	5	698	234	37767	0.44	1	// AT4G38620 // AT1G05800 // AT5G66570 // AT1G19050 // AT1G20340
GO:0043169	F	cation binding	40	698	2087	37767	0.43	1	// AT2G38750 // AT5G05340 // AT4G27520 // AT1G64760 // AT3G06990 // AT3G10080 // AT4G24015 // AT1G44970 // AT1G49200 // AT1G08080 // AT5G41400 // AT5G58480 // AT4G15975 // AT1G14550 // AT5G37770 // AT2G34060 // AT1G76640 // AT4G23670 // AT4G02540 // AT1G64710 // AT4G39070 // AT1G61840 // AT5G15350 // AT1G31710 // AT3G55430 // AT1G49230 // AT2G23100 // AT2G28210 // AT1G51090 // AT5G52010 // AT2G37…
GO:0070011	F	peptidase activity, acting on L-amino acid peptides	15	698	579	37767	0.13	1	// AT1G32970 // AT2G39710 // AT1G01300 // AT5G19100 // AT2G05920 // AT5G42240 // AT3G25700 // AT3G43960 // AT5G10770 // AT4G35350 // AT4G16563 // AT5G19110 // AT5G07030 // AT2G22990 // AT3G48350
GO:0060089	F	molecular transducer activity	10	698	422	37767	0.26	1	// AT3G45780 // AT5G62920 // AT5G46330 // AT3G48100 // AT1G19050 // AT3G45640 // AT3G23805 // AT2G20142 // AT4G31820 // AT5G38280
GO:0000166	F	nucleotide binding	21	698	2267	37767	1	1	// AT2G46760 // AT2G24130 // AT3G45780 // AT2G41890 // AT4G12720 // AT1G09450 // AT5G15410 // AT5G46330 // AT1G76720 // AT2G46780 // AT5G23730 // AT3G07960 // AT5G24010 // AT1G56720 // AT2G34810 // AT1G76360 // AT2G05940 // AT3G44190 // AT4G26510 // AT3G59350 // AT2G21450
GO:0019787	F	small conjugating protein ligase activity	6	698	336	37767	0.59	1	// AT3G61590 // AT1G23030 // AT4G36410 // AT1G24330 // AT2G35930 // AT5G65920
GO:0016818	F	hydrolase activity, acting on acid anhydrides, in phosphorus-containing anhydrides	8	698	837	37767	0.99	1	// AT1G76720 // AT4G12720 // AT1G27770 // AT1G18370 // AT4G18050 // AT1G17840 // AT2G21450 // AT5G27000
GO:0046914	F	transition metal ion binding	32	698	1618	37767	0.37	1	// AT5G05340 // AT4G27520 // AT3G06990 // AT3G10080 // AT4G24015 // AT1G44970 // AT1G49200 // AT1G08080 // AT5G41400 // AT4G15975 // AT1G14550 // AT2G34060 // AT4G23670 // AT4G02540 // AT1G64710 // AT4G39070 // AT1G61840 // AT5G15350 // AT1G31710 // AT1G49230 // AT2G23100 // AT2G28210 // AT5G52010 // AT2G37130 // AT5G25160 // AT4G07950 // AT2G38380 // AT1G80730 // AT4G16141 // AT1G76410 // AT5G24…
GO:0030554	F	adenyl nucleotide binding	15	698	1465	37767	1	1	// AT2G46760 // AT2G24130 // AT2G41890 // AT1G09450 // AT5G46330 // AT4G26510 // AT3G07960 // AT5G24010 // AT1G56720 // AT2G34810 // AT1G76360 // AT2G05940 // AT3G44190 // AT3G59350 // AT2G21450
GO:0032555	F	purine ribonucleotide binding	13	698	1631	37767	1	1	// AT2G24130 // AT2G41890 // AT1G09450 // AT5G46330 // AT1G76720 // AT4G26510 // AT3G07960 // AT5G24010 // AT1G56720 // AT1G76360 // AT2G05940 // AT3G59350 // AT2G21450
GO:0003723	F	RNA binding	5	698	1379	37767	1	1	// AT1G03300 // AT5G66570 // AT5G52070 // AT2G46780 // AT4G26370
GO:0016874	F	ligase activity	7	698	564	37767	0.89	1	// AT3G61590 // AT1G23030 // AT2G35930 // AT1G24330 // AT3G25660 // AT4G36410 // AT5G65920
GO:0042578	F	phosphoric ester hydrolase activity	9	698	481	37767	0.53	1	// AT4G39770 // AT5G24780 // AT5G24770 // AT4G33920 // AT2G01880 // AT5G63140 // AT5G10100 // AT5G41080 // AT4G18010
GO:0016817	F	hydrolase activity, acting on acid anhydrides	8	698	839	37767	0.99	1	// AT1G76720 // AT4G12720 // AT1G27770 // AT1G18370 // AT4G18050 // AT1G17840 // AT2G21450 // AT5G27000
GO:0016881	F	acid-amino acid ligase activity	6	698	364	37767	0.66	1	// AT3G61590 // AT1G23030 // AT4G36410 // AT1G24330 // AT2G35930 // AT5G65920
GO:0003676	F	nucleic acid binding	79	698	4842	37767	0.89	1	// AT5G49520 // AT3G50060 // AT4G38620 // AT3G24310 // AT1G63030 // AT1G32640 // AT3G61890 // AT3G16350 // AT4G16750 // AT5G10550 // AT5G60890 // AT1G71930 // AT4G34410 // AT2G44840 // AT2G23290 // AT5G64530 // AT3G17609 // AT2G45820 // AT3G22830 // AT5G43650 // AT2G21450 // AT4G39070 // AT4G07950 // AT5G51990 // AT2G46510 // AT4G32800 // AT1G62975 // AT2G41870 // AT1G12610 // AT4G01540 // AT1G74…
GO:0016853	F	isomerase activity	7	698	265	37767	0.23	1	// AT3G01260 // AT4G30440 // AT3G23820 // AT3G15520 // AT3G25780 // AT1G78955 // AT5G48010
GO:0043167	F	ion binding	40	698	2087	37767	0.43	1	// AT2G38750 // AT5G05340 // AT4G27520 // AT1G64760 // AT3G06990 // AT3G10080 // AT4G24015 // AT1G44970 // AT1G49200 // AT1G08080 // AT5G41400 // AT5G58480 // AT4G15975 // AT1G14550 // AT5G37770 // AT2G34060 // AT1G76640 // AT4G23670 // AT4G02540 // AT1G64710 // AT4G39070 // AT1G61840 // AT5G15350 // AT1G31710 // AT3G55430 // AT1G49230 // AT2G23100 // AT2G28210 // AT1G51090 // AT5G52010 // AT2G37…
GO:0017076	F	purine nucleotide binding	16	698	1713	37767	1	1	// AT2G46760 // AT2G24130 // AT2G41890 // AT1G09450 // AT5G46330 // AT1G76720 // AT4G26510 // AT3G07960 // AT5G24010 // AT1G56720 // AT2G34810 // AT1G76360 // AT2G05940 // AT3G44190 // AT3G59350 // AT2G21450
GO:0005524	F	ATP binding	12	698	1377	37767	1	1	// AT2G24130 // AT2G41890 // AT1G09450 // AT5G46330 // AT4G26510 // AT3G07960 // AT5G24010 // AT1G56720 // AT1G76360 // AT2G05940 // AT3G59350 // AT2G21450
GO:0016301	F	kinase activity	31	698	1641	37767	0.48	1	// AT1G05100 // AT2G41890 // AT5G46330 // AT2G43690 // AT3G07960 // AT1G76360 // AT3G60550 // AT3G45640 // AT2G05940 // AT3G59350 // AT2G24130 // AT5G60890 // AT1G78940 // AT2G45080 // AT5G25930 // AT3G45780 // AT1G51940 // AT4G26890 // AT1G07150 // AT5G24010 // AT5G54380 // AT2G33580 // AT4G26510 // AT5G38280 // AT2G30040 // AT5G40030 // AT1G09450 // AT1G56720 // AT3G05140 // AT5G48740 // AT5G63…
GO:0017111	F	nucleoside-triphosphatase activity	7	698	792	37767	0.99	1	// AT1G76720 // AT1G27770 // AT1G18370 // AT4G18050 // AT1G17840 // AT2G21450 // AT5G27000
GO:0022892	F	substrate-specific transporter activity	24	698	1059	37767	0.18	1	// AT5G63850 // AT1G16370 // AT5G45105 // AT1G77380 // AT1G22710 // AT3G54820 // AT5G15410 // AT3G10290 // AT5G52000 // AT1G19770 // AT2G38060 // AT1G71880 // AT3G16240 // AT4G27730 // AT4G13420 // AT5G48485 // AT1G77690 // AT1G12500 // AT3G45060 // AT2G39450 // AT1G17840 // AT1G27770 // AT2G22500 // AT2G21540
GO:0016772	F	transferase activity, transferring phosphorus-containing groups	32	698	1887	37767	0.71	1	// AT1G05100 // AT2G41890 // AT5G46330 // AT2G43690 // AT3G07960 // AT1G76360 // AT3G60550 // AT3G45640 // AT2G05940 // AT3G59350 // AT2G24130 // AT5G60890 // AT1G78940 // AT2G45080 // AT5G25930 // AT3G45780 // AT1G51940 // AT4G26890 // AT1G07150 // AT5G24010 // AT5G54380 // AT2G33580 // AT4G26510 // AT5G38280 // AT2G30040 // AT4G07950 // AT5G40030 // AT1G09450 // AT1G56720 // AT3G05140 // AT5G48…
GO:0032553	F	ribonucleotide binding	13	698	1631	37767	1	1	// AT2G24130 // AT2G41890 // AT1G09450 // AT5G46330 // AT1G76720 // AT4G26510 // AT3G07960 // AT5G24010 // AT1G56720 // AT1G76360 // AT2G05940 // AT3G59350 // AT2G21450
GO:0016791	F	phosphatase activity	8	698	407	37767	0.48	1	// AT4G39770 // AT5G24780 // AT5G24770 // AT4G33920 // AT2G01880 // AT5G63140 // AT5G10100 // AT4G18010
GO:0004842	F	ubiquitin-protein ligase activity	6	698	324	37767	0.55	1	// AT3G61590 // AT1G23030 // AT4G36410 // AT1G24330 // AT2G35930 // AT5G65920
GO:0008270	F	zinc ion binding	20	698	1299	37767	0.82	1	// AT5G52010 // AT4G39070 // AT4G07950 // AT5G25160 // AT1G61840 // AT1G08080 // AT3G06990 // AT5G41400 // AT4G02540 // AT4G15975 // AT4G16141 // AT1G49230 // AT4G24015 // AT1G76410 // AT1G80730 // AT2G23100 // AT2G28210 // AT1G49200 // AT5G24930 // AT1G64710
GO:0016879	F	ligase activity, forming carbon-nitrogen bonds	7	698	423	37767	0.67	1	// AT3G61590 // AT1G23030 // AT2G35930 // AT1G24330 // AT3G25660 // AT4G36410 // AT5G65920
GO:0005198	F	structural molecule activity	7	698	659	37767	0.96	1	// AT1G26770 // AT1G23410 // AT3G12110 // AT5G15760 // AT4G13340 // AT1G32990 // AT1G76930
GO:0015293	F	symporter activity	5	698	164	37767	0.19	1	// AT1G22710 // AT1G71880 // AT2G38060 // AT1G16370 // AT4G13420
GO:0008289	F	lipid binding	7	698	323	37767	0.39	1	// AT2G38750 // AT3G22120 // AT5G48485 // AT1G12090 // AT2G44300 // AT4G22610 // AT5G01870
GO:0016773	F	phosphotransferase activity, alcohol group as acceptor	17	698	1154	37767	0.86	1	// AT2G45080 // AT2G24130 // AT3G45780 // AT2G41890 // AT1G09450 // AT5G46330 // AT1G56720 // AT5G38280 // AT3G07960 // AT5G24010 // AT3G60550 // AT5G54380 // AT3G45640 // AT1G76360 // AT2G05940 // AT3G59350 // AT5G63770
GO:0005516	F	calmodulin binding	6	698	231	37767	0.26	1	// AT5G57010 // AT2G38540 // AT1G27770 // AT4G23060 // AT5G15410 // AT3G59220
GO:0005515	F	protein binding	45	698	2944	37767	0.92	1	// AT3G05470 // AT5G06870 // AT2G26380 // AT4G12720 // AT2G34930 // AT1G71400 // AT4G20940 // AT2G05920 // AT5G46330 // AT3G06778 // AT5G15410 // AT4G24015 // AT3G45640 // AT1G49200 // AT1G78230 // AT5G27000 // AT1G76790 // AT4G18510 // AT5G24780 // AT1G27770 // AT2G19780 // AT5G41400 // AT2G21510 // AT4G13340 // AT4G15975 // AT1G19180 // AT5G59730 // AT3G06990 // AT1G61840 // AT3G45780 // AT5G57…
GO:0015075	F	ion transmembrane transporter activity	12	698	655	37767	0.55	1	// AT4G13420 // AT1G27770 // AT2G39450 // AT2G38060 // AT3G10290 // AT5G15410 // AT1G22710 // AT1G12500 // AT1G16370 // AT5G45105 // AT1G71880 // AT3G45060
GO:0008233	F	peptidase activity	15	698	646	37767	0.22	1	// AT1G32970 // AT2G39710 // AT1G01300 // AT5G19100 // AT2G05920 // AT5G42240 // AT3G25700 // AT3G43960 // AT5G10770 // AT4G35350 // AT4G16563 // AT5G19110 // AT5G07030 // AT2G22990 // AT3G48350
GO:0005488	F	binding	195	698	11258	37767	0.87	1	// AT3G05470 // AT3G50060 // AT2G41890 // AT3G24310 // AT4G14690 // AT1G29930 // AT2G34930 // AT5G10550 // AT3G28880 // AT4G38620 // AT1G68360 // AT2G28210 // AT5G06870 // AT1G44970 // AT5G64530 // AT3G16530 // AT1G65390 // AT3G22830 // AT5G43650 // AT1G76790 // AT1G23030 // AT2G19780 // AT5G41400 // AT5G58480 // AT1G51090 // AT4G25480 // AT2G34060 // AT1G76640 // AT1G19180 // AT4G02540 // AT4G37…
GO:0004672	F	protein kinase activity	15	698	953	37767	0.77	1	// AT2G45080 // AT2G24130 // AT3G45780 // AT2G41890 // AT1G09450 // AT5G46330 // AT1G56720 // AT5G24010 // AT3G60550 // AT5G54380 // AT3G45640 // AT1G76360 // AT2G05940 // AT3G59350 // AT5G38280
GO:0004871	F	signal transducer activity	10	698	422	37767	0.26	1	// AT3G45780 // AT5G62920 // AT5G46330 // AT3G48100 // AT1G19050 // AT3G45640 // AT3G23805 // AT2G20142 // AT4G31820 // AT5G38280
GO:0015291	F	secondary active transmembrane transporter activity	8	698	345	37767	0.31	1	// AT4G13420 // AT2G39450 // AT5G17700 // AT1G22710 // AT2G38060 // AT1G16370 // AT1G61890 // AT1G71880
GO:0001883	F	purine nucleoside binding	15	698	1465	37767	1	1	// AT2G46760 // AT2G24130 // AT2G41890 // AT1G09450 // AT5G46330 // AT4G26510 // AT3G07960 // AT5G24010 // AT1G56720 // AT2G34810 // AT1G76360 // AT2G05940 // AT3G44190 // AT3G59350 // AT2G21450
GO:0001882	F	nucleoside binding	15	698	1465	37767	1	1	// AT2G46760 // AT2G24130 // AT2G41890 // AT1G09450 // AT5G46330 // AT4G26510 // AT3G07960 // AT5G24010 // AT1G56720 // AT2G34810 // AT1G76360 // AT2G05940 // AT3G44190 // AT3G59350 // AT2G21450
GO:0046872	F	metal ion binding	36	698	1997	37767	0.58	1	// AT2G38750 // AT5G05340 // AT4G27520 // AT3G06990 // AT3G10080 // AT4G24015 // AT1G44970 // AT1G49200 // AT1G08080 // AT5G41400 // AT4G15975 // AT1G14550 // AT5G37770 // AT2G34060 // AT1G76640 // AT4G23670 // AT4G02540 // AT1G64710 // AT4G39070 // AT1G61840 // AT5G15350 // AT1G31710 // AT1G49230 // AT2G23100 // AT2G28210 // AT1G51090 // AT5G52010 // AT2G37130 // AT5G25160 // AT4G07950 // AT2G38…
GO:0022857	F	transmembrane transporter activity	24	698	1128	37767	0.27	1	// AT5G63850 // AT1G16370 // AT1G61890 // AT5G45105 // AT1G77380 // AT1G22710 // AT3G54820 // AT5G15410 // AT3G10290 // AT1G19770 // AT2G38060 // AT1G71880 // AT3G16240 // AT4G13420 // AT5G17700 // AT1G12500 // AT2G27810 // AT1G77690 // AT3G45060 // AT2G39450 // AT4G18050 // AT1G17840 // AT1G27770 // AT2G22500
GO:0004674	F	protein serine/threonine kinase activity	12	698	681	37767	0.61	1	// AT2G45080 // AT2G24130 // AT3G45780 // AT5G46330 // AT1G56720 // AT5G24010 // AT3G60550 // AT3G45640 // AT1G76360 // AT2G05940 // AT3G59350 // AT5G38280
GO:0032559	F	adenyl ribonucleotide binding	12	698	1384	37767	1	1	// AT2G24130 // AT2G41890 // AT1G09450 // AT5G46330 // AT4G26510 // AT3G07960 // AT5G24010 // AT1G56720 // AT1G76360 // AT2G05940 // AT3G59350 // AT2G21450
GO:0022804	F	active transmembrane transporter activity	15	698	664	37767	0.25	1	// AT1G22710 // AT4G13420 // AT2G39450 // AT5G17700 // AT5G63850 // AT4G18050 // AT1G17840 // AT2G38060 // AT1G16370 // AT1G61890 // AT1G27770 // AT1G71880 // AT3G16240 // AT1G77380 // AT1G77690
GO:0008324	F	cation transmembrane transporter activity	9	698	503	37767	0.58	1	// AT4G13420 // AT1G27770 // AT2G39450 // AT5G15410 // AT1G22710 // AT2G38060 // AT1G16370 // AT5G45105 // AT1G71880
GO:0050662	F	coenzyme binding	6	698	191	37767	0.15	1	// AT2G46760 // AT3G44190 // AT3G45780 // AT4G12720 // AT3G18890 // AT2G34810
GO:0022891	F	substrate-specific transmembrane transporter activity	19	698	908	37767	0.33	1	// AT1G27770 // AT1G22710 // AT4G13420 // AT5G63850 // AT2G39450 // AT2G38060 // AT3G10290 // AT1G77690 // AT1G19770 // AT1G12500 // AT5G15410 // AT1G16370 // AT1G77380 // AT5G45105 // AT1G71880 // AT3G16240 // AT3G54820 // AT2G22500 // AT3G45060
GO:0048037	F	cofactor binding	7	698	246	37767	0.18	1	// AT2G46760 // AT3G44190 // AT3G45780 // AT4G12720 // AT1G31710 // AT3G18890 // AT2G34810
GO:0016462	F	pyrophosphatase activity	8	698	832	37767	0.99	1	// AT1G76720 // AT4G12720 // AT1G27770 // AT1G18370 // AT4G18050 // AT1G17840 // AT2G21450 // AT5G27000
GO:0044424	C	intracellular part	144	698	9302	37767	0.99	1	// AT1G58290 // AT1G29930 // AT5G20260 // AT3G16530 // AT5G43650 // AT1G76790 // AT1G23030 // AT1G05800 // AT3G12110 // AT1G75100 // AT4G25480 // AT2G38060 // AT1G19050 // AT1G74500 // AT1G49840 // AT1G19180 // AT3G09260 // AT5G11650 // AT5G05350 // AT3G18890 // AT4G23670 // AT3G47860 // AT3G57010 // AT1G04420 // AT4G31820 // AT4G25470 // AT1G21910 // AT1G20450 // AT4G37410 // AT4G33920 // AT1G20…
GO:0044422	C	organelle part	26	698	2562	37767	1	1	// AT3G47860 // AT5G67620 // AT1G31330 // AT4G04640 // AT5G02940 // AT4G12800 // AT1G32990 // AT5G66570 // AT5G42650 // AT1G27770 // AT4G03280 // AT1G55670 // AT3G16240 // AT4G01540 // AT2G46820 // AT3G18890 // AT4G17090 // AT1G04420 // AT1G13930 // AT1G23410 // AT5G16010 // AT3G25660 // AT1G20340 // AT1G61520 // AT3G15520 // AT2G22500
GO:0009941	C	chloroplast envelope	7	698	265	37767	0.23	1	// AT1G13930 // AT5G16010 // AT1G27770 // AT3G18890 // AT5G02940 // AT2G46820 // AT1G04420
GO:0009526	C	plastid envelope	7	698	331	37767	0.42	1	// AT1G13930 // AT5G16010 // AT1G27770 // AT3G18890 // AT5G02940 // AT2G46820 // AT1G04420
GO:0005622	C	intracellular	146	698	9671	37767	1	1	// AT1G58290 // AT1G29930 // AT5G20260 // AT3G16530 // AT5G43650 // AT1G76790 // AT1G23030 // AT1G05800 // AT3G12110 // AT1G75100 // AT4G25480 // AT2G38060 // AT1G19050 // AT1G74500 // AT1G49840 // AT1G19180 // AT3G09260 // AT5G11650 // AT5G05350 // AT3G18890 // AT4G23670 // AT3G47860 // AT3G57010 // AT1G04420 // AT4G31820 // AT4G25470 // AT1G21910 // AT1G20450 // AT4G37410 // AT4G33920 // AT1G20…
GO:0005737	C	cytoplasm	103	698	6822	37767	0.99	1	// AT1G58290 // AT5G20260 // AT1G69040 // AT1G05800 // AT3G12110 // AT1G75100 // AT2G38060 // AT1G49840 // AT5G11650 // AT5G05350 // AT3G18890 // AT4G23670 // AT3G57010 // AT1G04420 // AT4G31820 // AT1G21910 // AT1G20450 // AT1G24330 // AT4G33920 // AT1G20340 // AT3G18000 // AT5G48530 // AT3G14310 // AT4G35985 // AT1G72520 // AT5G26030 // AT4G27520 // AT2G17650 // AT1G31330 // AT4G04640 // AT5G15…
GO:0043234	C	protein complex	17	698	1443	37767	0.98	1	// AT1G29930 // AT1G23030 // AT4G04640 // AT5G66570 // AT5G65920 // AT4G33920 // AT1G31330 // AT5G67620 // AT3G61470 // AT1G78070 // AT1G61520 // AT4G03280 // AT4G12800 // AT2G46820 // AT1G55670 // AT5G59730 // AT5G23730
GO:0043231	C	intracellular membrane-bounded organelle	120	698	7615	37767	0.98	1	// AT1G58290 // AT5G20260 // AT5G43650 // AT1G05800 // AT4G25480 // AT2G38060 // AT1G19050 // AT1G74500 // AT1G49840 // AT1G19180 // AT3G09260 // AT5G11650 // AT5G05350 // AT3G18890 // AT4G23670 // AT3G57010 // AT1G04420 // AT4G31820 // AT4G25470 // AT1G21910 // AT1G20450 // AT4G37410 // AT4G33920 // AT1G20340 // AT2G22850 // AT2G46510 // AT5G48530 // AT5G51790 // AT5G43270 // AT4G35985 // AT1G72…
GO:0043232	C	intracellular non-membrane-bounded organelle	6	698	1040	37767	1	1	// AT1G23410 // AT3G12110 // AT5G67620 // AT5G15760 // AT2G46820 // AT1G32990
GO:0005829	C	cytosol	7	698	912	37767	1	1	// AT1G76790 // AT1G23410 // AT1G69040 // AT2G35930 // AT4G12720 // AT3G03780 // AT1G32990
GO:0044436	C	thylakoid part	9	698	307	37767	0.12	1	// AT3G47860 // AT4G04640 // AT5G66570 // AT2G46820 // AT1G20340 // AT4G03280 // AT3G18890 // AT3G15520 // AT1G55670
GO:0044435	C	plastid part	19	698	867	37767	0.26	1	// AT1G13930 // AT4G04640 // AT5G66570 // AT3G15520 // AT5G16010 // AT1G27770 // AT1G31330 // AT3G25660 // AT4G17090 // AT4G03280 // AT1G20340 // AT3G18890 // AT5G42650 // AT1G61520 // AT5G02940 // AT4G12800 // AT2G46820 // AT1G55670 // AT1G04420
GO:0044434	C	chloroplast part	19	698	746	37767	0.11	1	// AT1G13930 // AT4G04640 // AT5G66570 // AT3G15520 // AT5G16010 // AT1G27770 // AT1G31330 // AT3G25660 // AT4G17090 // AT4G03280 // AT1G20340 // AT3G18890 // AT5G42650 // AT1G61520 // AT5G02940 // AT4G12800 // AT2G46820 // AT1G55670 // AT1G04420
GO:0009507	C	chloroplast	54	698	2740	37767	0.33	1	// AT1G58290 // AT5G26030 // AT4G27520 // AT1G31330 // AT4G04640 // AT5G15190 // AT5G15760 // AT2G39800 // AT1G64355 // AT5G66550 // AT4G12800 // AT3G53130 // AT1G10070 // AT1G44830 // AT1G05800 // AT5G66570 // AT4G28290 // AT5G42650 // AT1G27770 // AT4G03280 // AT1G50040 // AT5G10100 // AT1G49840 // AT1G55670 // AT5G20260 // AT4G26370 // AT1G13930 // AT5G11650 // AT5G05350 // AT3G18890 // AT5G40…
GO:0031090	C	organelle membrane	11	698	842	37767	0.91	1	// AT4G04640 // AT5G66570 // AT4G01540 // AT1G27770 // AT3G15520 // AT4G03280 // AT3G18890 // AT2G46820 // AT1G55670 // AT3G16240 // AT2G22500
GO:0042651	C	thylakoid membrane	7	698	244	37767	0.17	1	// AT5G66570 // AT4G04640 // AT4G03280 // AT3G18890 // AT2G46820 // AT3G15520 // AT1G55670
GO:0009535	C	chloroplast thylakoid membrane	7	698	231	37767	0.14	1	// AT5G66570 // AT4G04640 // AT4G03280 // AT3G18890 // AT2G46820 // AT3G15520 // AT1G55670
GO:0009534	C	chloroplast thylakoid	8	698	290	37767	0.18	1	// AT4G04640 // AT5G66570 // AT2G46820 // AT1G20340 // AT4G03280 // AT3G18890 // AT3G15520 // AT1G55670
GO:0009536	C	plastid	57	698	2965	37767	0.4	1	// AT1G58290 // AT5G26030 // AT4G27520 // AT1G31330 // AT4G04640 // AT5G15190 // AT5G15760 // AT2G39800 // AT1G64355 // AT4G03280 // AT4G12800 // AT3G53130 // AT1G10070 // AT1G44830 // AT1G05800 // AT5G66570 // AT4G28290 // AT5G42650 // AT1G27770 // AT2G46820 // AT1G50040 // AT2G38060 // AT5G10100 // AT1G49840 // AT1G55670 // AT5G20260 // AT4G26370 // AT1G13930 // AT5G11650 // AT5G05350 // AT3G18…
GO:0009532	C	plastid stroma	5	698	322	37767	0.71	1	// AT1G13930 // AT1G04420 // AT3G25660 // AT4G17090 // AT2G46820
GO:0005783	C	endoplasmic reticulum	6	698	466	37767	0.86	1	// AT4G37410 // AT4G01540 // AT1G27770 // AT3G57020 // AT2G29980 // AT3G57010
GO:0031976	C	plastid thylakoid	8	698	293	37767	0.18	1	// AT4G04640 // AT5G66570 // AT2G46820 // AT1G20340 // AT4G03280 // AT3G18890 // AT3G15520 // AT1G55670
GO:0031975	C	envelope	9	698	595	37767	0.77	1	// AT1G13930 // AT4G01540 // AT5G16010 // AT1G27770 // AT3G18890 // AT5G02940 // AT2G46820 // AT1G04420 // AT2G22500
GO:0005773	C	vacuole	9	698	383	37767	0.28	1	// AT4G27520 // AT1G27100 // AT3G57020 // AT4G35350 // AT3G22060 // AT4G23670 // AT3G16240 // AT1G78230 // AT5G15350
GO:0043229	C	intracellular organelle	124	698	8149	37767	0.99	1	// AT1G58290 // AT5G20260 // AT3G16530 // AT5G43650 // AT1G05800 // AT4G25480 // AT2G38060 // AT1G19050 // AT1G74500 // AT1G49840 // AT1G19180 // AT3G09260 // AT5G11650 // AT5G05350 // AT3G18890 // AT4G23670 // AT3G47860 // AT3G57010 // AT1G04420 // AT4G31820 // AT4G25470 // AT1G21910 // AT1G20450 // AT4G37410 // AT4G33920 // AT1G20340 // AT2G22850 // AT2G46510 // AT5G48530 // AT5G51790 // AT5G43…
GO:0043228	C	non-membrane-bounded organelle	6	698	1040	37767	1	1	// AT1G23410 // AT3G12110 // AT5G67620 // AT5G15760 // AT2G46820 // AT1G32990
GO:0043227	C	membrane-bounded organelle	120	698	7622	37767	0.98	1	// AT1G58290 // AT5G20260 // AT5G43650 // AT1G05800 // AT4G25480 // AT2G38060 // AT1G19050 // AT1G74500 // AT1G49840 // AT1G19180 // AT3G09260 // AT5G11650 // AT5G05350 // AT3G18890 // AT4G23670 // AT3G57010 // AT1G04420 // AT4G31820 // AT4G25470 // AT1G21910 // AT1G20450 // AT4G37410 // AT4G33920 // AT1G20340 // AT2G22850 // AT2G46510 // AT5G48530 // AT5G51790 // AT5G43270 // AT4G35985 // AT1G72…
GO:0043226	C	organelle	124	698	8155	37767	0.99	1	// AT1G58290 // AT5G20260 // AT3G16530 // AT5G43650 // AT1G05800 // AT4G25480 // AT2G38060 // AT1G19050 // AT1G74500 // AT1G49840 // AT1G19180 // AT3G09260 // AT5G11650 // AT5G05350 // AT3G18890 // AT4G23670 // AT3G47860 // AT3G57010 // AT1G04420 // AT4G31820 // AT4G25470 // AT1G21910 // AT1G20450 // AT4G37410 // AT4G33920 // AT1G20340 // AT2G22850 // AT2G46510 // AT5G48530 // AT5G51790 // AT5G43…
GO:0044446	C	intracellular organelle part	26	698	2561	37767	1	1	// AT3G47860 // AT5G67620 // AT1G31330 // AT4G04640 // AT5G02940 // AT4G12800 // AT1G32990 // AT5G66570 // AT5G42650 // AT1G27770 // AT4G03280 // AT1G55670 // AT3G16240 // AT4G01540 // AT2G46820 // AT3G18890 // AT4G17090 // AT1G04420 // AT1G13930 // AT1G23410 // AT5G16010 // AT3G25660 // AT1G20340 // AT1G61520 // AT3G15520 // AT2G22500
GO:0044444	C	cytoplasmic part	91	698	6289	37767	1	1	// AT1G58290 // AT5G20260 // AT1G69040 // AT1G05800 // AT3G12110 // AT2G38060 // AT1G49840 // AT5G11650 // AT5G05350 // AT3G18890 // AT4G23670 // AT3G57010 // AT1G04420 // AT4G31820 // AT1G21910 // AT1G24330 // AT4G33920 // AT1G20340 // AT5G48530 // AT4G35985 // AT1G72520 // AT5G26030 // AT4G27520 // AT2G17650 // AT1G31330 // AT4G04640 // AT5G15190 // AT5G15760 // AT3G11350 // AT2G39800 // AT1G78…
GO:0005634	C	nucleus	40	698	2621	37767	0.91	1	// AT3G61890 // AT1G33760 // AT1G71930 // AT4G34410 // AT2G44840 // AT2G22760 // AT5G51990 // AT1G44830 // AT4G32800 // AT1G62975 // AT5G43650 // AT1G74930 // AT4G25480 // AT4G27410 // AT3G48100 // AT1G19050 // AT1G74500 // AT1G19180 // AT5G53290 // AT4G01540 // AT4G17760 // AT1G29660 // AT3G16530 // AT3G11280 // AT4G25470 // AT1G21910 // AT1G20450 // AT3G03260 // AT1G77640 // AT4G31800 // AT4G07…
GO:0005739	C	mitochondrion	13	698	1276	37767	0.99	1	// AT5G26030 // AT2G28780 // AT5G42650 // AT2G17650 // AT3G54020 // AT5G67245 // AT3G12110 // AT4G16700 // AT1G09575 // AT3G11350 // AT4G33920 // AT5G48530 // AT2G22500
GO:0031984	C	organelle subcompartment	8	698	295	37767	0.19	1	// AT4G04640 // AT5G66570 // AT2G46820 // AT1G20340 // AT4G03280 // AT3G18890 // AT3G15520 // AT1G55670
GO:0031967	C	organelle envelope	9	698	595	37767	0.77	1	// AT1G13930 // AT4G01540 // AT5G16010 // AT1G27770 // AT3G18890 // AT5G02940 // AT2G46820 // AT1G04420 // AT2G22500
GO:0055035	C	plastid thylakoid membrane	7	698	231	37767	0.14	1	// AT5G66570 // AT4G04640 // AT4G03280 // AT3G18890 // AT2G46820 // AT3G15520 // AT1G55670
GO:0032991	C	macromolecular complex	20	698	2180	37767	1	1	// AT1G29930 // AT1G23030 // AT4G04640 // AT5G66570 // AT5G65920 // AT4G33920 // AT1G31330 // AT5G67620 // AT1G23410 // AT1G78070 // AT5G15760 // AT1G61520 // AT4G03280 // AT4G12800 // AT2G46820 // AT1G55670 // AT1G32990 // AT5G59730 // AT5G23730 // AT3G61470

## Sheet: upwtvs20
GO terms derived from genes significantly induced in Col-0 versus med20
GO_acc	term_type	Term	queryitem	querytotal	bgitem	bgtotal	pvalue	FDR	entries
GO:0030312	C	external encapsulating structure	61	989	407	37767	1.5e-25	5.2e-23	// AT2G02100 // AT1G65310 // AT3G49120 // AT3G54400 // AT1G01300 // AT2G28950 // AT2G34930 // AT1G02810 // AT2G05920 // AT2G44450 // AT5G45280 // AT5G06870 // AT4G16563 // AT5G57560 // AT5G51550 // AT3G45970 // AT1G26770 // AT4G33220 // AT1G53070 // AT2G06850 // AT5G23870 // AT3G08030 // AT3G62680 // AT4G38770 // AT5G05340 // AT3G16240 // AT1G74010 // AT1G35140 // AT4G38420 // AT1G64670 // AT5G64…
GO:0005618	C	cell wall	60	989	403	37767	5.2e-25	8.8e-23	// AT2G02100 // AT1G65310 // AT3G49120 // AT3G54400 // AT1G01300 // AT2G28950 // AT2G34930 // AT1G02810 // AT2G05920 // AT2G44450 // AT5G45280 // AT5G06870 // AT4G16563 // AT5G57560 // AT5G51550 // AT3G45970 // AT1G26770 // AT4G33220 // AT1G53070 // AT2G06850 // AT5G23870 // AT3G08030 // AT3G62680 // AT4G38770 // AT5G05340 // AT3G16240 // AT1G74010 // AT1G35140 // AT4G38420 // AT5G64260 // AT1G12…
GO:0009505	C	plant-type cell wall	45	989	254	37767	1.1e-21	1.2e-19	// AT2G02100 // AT1G65310 // AT3G49120 // AT3G54400 // AT1G01300 // AT2G28950 // AT1G02810 // AT2G05920 // AT2G44450 // AT5G06870 // AT4G16563 // AT5G51550 // AT3G45970 // AT1G26770 // AT4G33220 // AT1G53070 // AT2G06850 // AT5G23870 // AT3G16240 // AT1G74010 // AT1G35140 // AT4G38420 // AT5G64260 // AT1G12040 // AT5G18470 // AT2G38540 // AT5G47500 // AT3G18080 // AT2G41800 // AT3G45960 // AT5G04…
GO:0031225	C	anchored to membrane	37	989	272	37767	8.2e-15	7e-13	// AT1G21880 // AT4G27520 // AT1G64760 // AT5G55730 // AT2G04780 // AT1G21090 // AT5G04310 // AT5G65390 // AT5G10430 // AT2G14890 // AT5G11740 // AT5G56540 // AT5G58480 // AT2G44300 // AT1G70990 // AT3G43960 // AT5G15350 // AT3G15720 // AT3G61640 // AT1G29980 // AT4G12730 // AT1G18650 // AT5G19230 // AT3G06035 // AT2G34510 // AT1G55330 // AT4G31840 // AT5G42100 // AT4G26320 // AT5G49280 // AT5G64…
GO:0050896	P	response to stimulus	192	989	4057	37767	1.8e-15	3.2e-12	// AT2G38750 // AT3G50060 // AT5G07010 // AT5G06870 // AT1G80840 // AT4G14690 // AT5G15230 // AT2G34930 // AT4G38410 // AT3G44320 // AT4G37590 // AT1G20510 // AT1G44970 // AT5G46450 // AT1G65390 // AT2G20142 // AT1G69040 // AT1G23030 // AT1G66160 // AT3G26744 // AT5G64900 // AT1G12610 // AT1G19610 // AT3G12710 // AT4G35480 // AT5G50250 // AT5G53750 // AT1G19050 // AT2G34060 // AT2G21490 // AT1G19…
GO:0016798	F	hydrolase activity, acting on glycosyl bonds	52	989	526	37767	5.6e-15	4.3e-12	// AT3G57520 // AT4G02290 // AT2G43870 // AT4G03210 // AT3G06770 // AT1G64760 // AT3G44990 // AT3G13750 // AT2G43620 // AT3G12710 // AT5G25980 // AT1G65310 // AT5G48070 // AT1G10550 // AT5G64570 // AT5G57560 // AT1G19940 // AT1G66270 // AT5G58480 // AT2G06850 // AT4G36360 // AT4G14130 // AT4G30280 // AT3G09260 // AT1G70370 // AT1G64390 // AT5G34940 // AT1G02640 // AT3G52840 // AT5G26000 // AT3G15…
GO:0044464	C	cell part	510	989	15217	37767	1e-12	5.9e-11	// AT3G05470 // AT2G41890 // AT5G20260 // AT5G06870 // AT2G20142 // AT3G59350 // AT3G18200 // AT4G21680 // AT1G76790 // AT1G23030 // AT3G28550 // AT4G25480 // AT2G34060 // AT1G19180 // AT4G29140 // AT1G25450 // AT5G65590 // AT5G45670 // AT5G11650 // AT3G18890 // AT5G21960 // AT5G54380 // AT1G20510 // AT1G04420 // AT4G31820 // AT2G41800 // AT1G21910 // AT1G20450 // AT3G61820 // AT2G03830 // AT1G65…
GO:0005623	C	cell	510	989	15217	37767	1e-12	5.9e-11	// AT3G05470 // AT2G41890 // AT5G20260 // AT5G06870 // AT2G20142 // AT3G59350 // AT3G18200 // AT4G21680 // AT1G76790 // AT1G23030 // AT3G28550 // AT4G25480 // AT2G34060 // AT1G19180 // AT4G29140 // AT1G25450 // AT5G65590 // AT5G45670 // AT5G11650 // AT3G18890 // AT5G21960 // AT5G54380 // AT1G20510 // AT1G04420 // AT4G31820 // AT2G41800 // AT1G21910 // AT1G20450 // AT3G61820 // AT2G03830 // AT1G65…
GO:0042221	P	response to chemical stimulus	115	989	2085	37767	2.6e-13	2.2e-10	// AT2G38750 // AT3G50060 // AT5G07010 // AT1G80840 // AT5G15230 // AT4G38410 // AT1G44970 // AT1G69040 // AT1G23030 // AT1G66160 // AT5G64900 // AT1G30870 // AT4G25480 // AT1G19050 // AT2G34060 // AT2G21490 // AT1G19180 // AT4G29140 // AT4G34760 // AT1G72450 // AT5G17700 // AT5G25610 // AT5G54380 // AT2G28210 // AT4G18010 // AT4G35480 // AT4G19030 // AT1G20450 // AT5G14920 // AT3G15540 // AT4G26…
GO:0003824	F	catalytic activity	351	989	9638	37767	4.8e-12	1.8e-09	// AT2G41890 // AT5G20260 // AT3G44320 // AT3G16370 // AT3G59350 // AT1G76790 // AT1G23030 // AT3G15530 // AT2G34060 // AT1G64390 // AT1G25450 // AT5G45670 // AT5G11650 // AT3G18890 // AT1G02660 // AT3G23820 // AT5G54380 // AT1G20510 // AT3G62740 // AT1G04420 // AT5G67400 // AT3G61820 // AT1G07260 // AT5G63140 // AT4G20210 // AT3G14310 // AT3G49220 // AT5G26030 // AT3G06770 // AT2G05920 // AT3G21…
GO:0010876	P	lipid localization	13	989	24	37767	3.6e-12	2.1e-09	// AT2G38530 // AT3G22120 // AT2G38540 // AT3G51600 // AT1G27950 // AT5G64080 // AT3G53980 // AT1G17840 // AT2G44300 // AT1G12090 // AT3G43720 // AT5G01870 // AT4G12520
GO:0006950	P	response to stress	118	989	2320	37767	1.8e-11	7.8e-09	// AT2G38750 // AT3G50060 // AT5G06870 // AT1G80840 // AT2G34930 // AT4G38410 // AT3G44320 // AT1G44970 // AT5G46450 // AT1G65390 // AT2G20142 // AT1G70830 // AT1G05800 // AT3G26744 // AT5G64900 // AT1G12610 // AT1G19610 // AT3G12710 // AT5G50250 // AT5G53750 // AT2G34060 // AT2G21490 // AT1G19180 // AT1G72450 // AT1G25450 // AT5G11250 // AT5G25610 // AT1G20510 // AT4G25470 // AT3G26460 // AT1G20…
GO:0004553	F	hydrolase activity, hydrolyzing O-glycosyl compounds	41	989	476	37767	2.2e-10	5.5e-08	// AT3G57520 // AT4G02290 // AT3G06770 // AT1G64760 // AT3G13750 // AT2G43870 // AT5G25980 // AT5G64570 // AT1G19940 // AT1G66270 // AT5G58480 // AT2G43620 // AT4G36360 // AT5G26000 // AT3G09260 // AT1G70370 // AT1G64390 // AT5G34940 // AT1G02640 // AT3G52840 // AT3G15720 // AT3G55430 // AT1G11545 // AT4G37800 // AT4G23820 // AT4G17090 // AT1G26560 // AT3G18080 // AT3G62740 // AT5G20250 // AT5G63…
GO:0010033	P	response to organic substance	78	989	1342	37767	2.5e-10	8.7e-08	// AT2G38750 // AT3G50060 // AT4G38620 // AT2G35930 // AT1G80840 // AT5G65310 // AT2G24850 // AT1G32640 // AT3G16350 // AT3G28860 // AT2G34810 // AT5G44030 // AT5G42650 // AT2G44840 // AT3G45640 // AT5G57560 // AT1G69040 // AT1G23030 // AT1G66160 // AT1G76540 // AT5G24780 // AT5G64900 // AT5G60890 // AT4G01540 // AT4G15975 // AT4G34410 // AT4G27410 // AT2G06850 // AT3G48100 // AT5G37770 // AT1G19…
GO:0009611	P	response to wounding	25	989	197	37767	6.8e-10	1.7e-07	// AT1G80840 // AT2G24850 // AT1G32640 // AT2G34810 // AT2G30020 // AT3G45640 // AT1G17420 // AT3G44260 // AT1G05800 // AT5G64900 // AT2G06050 // AT5G53750 // AT1G76930 // AT1G72450 // AT5G24770 // AT5G13220 // AT3G61190 // AT1G20510 // AT2G20340 // AT1G01470 // AT5G42650 // AT2G46510 // AT4G34710 // AT5G63770 // AT1G72520
GO:0009719	P	response to endogenous stimulus	66	989	1068	37767	6.4e-10	1.7e-07	// AT2G38750 // AT3G50060 // AT4G38620 // AT3G50970 // AT5G65310 // AT2G24850 // AT1G32640 // AT3G16350 // AT3G28860 // AT2G34810 // AT5G44030 // AT5G42650 // AT2G44840 // AT3G45640 // AT5G57560 // AT1G69040 // AT2G46510 // AT1G76540 // AT5G24780 // AT5G64900 // AT5G60890 // AT4G01540 // AT4G27410 // AT2G06850 // AT3G48100 // AT5G37770 // AT1G19050 // AT3G50660 // AT1G17380 // AT5G62470 // AT4G34…
GO:0009753	P	response to jasmonic acid stimulus	26	989	215	37767	7.9e-10	1.7e-07	// AT3G50060 // AT4G38620 // AT2G24850 // AT1G32640 // AT3G16350 // AT5G44030 // AT5G42650 // AT2G34810 // AT5G24780 // AT5G64900 // AT5G60890 // AT5G07010 // AT1G17380 // AT5G62470 // AT1G19180 // AT1G76930 // AT1G72450 // AT5G24770 // AT3G47600 // AT5G13220 // AT2G34600 // AT4G18780 // AT5G09980 // AT4G34990 // AT4G34710 // AT4G37260
GO:0004091	F	carboxylesterase activity	34	989	378	37767	2.7e-09	5.2e-07	// AT1G75880 // AT1G02810 // AT3G16370 // AT5G62350 // AT5G45280 // AT5G53370 // AT1G09390 // AT2G23610 // AT4G02330 // AT3G47380 // AT1G05800 // AT1G56670 // AT1G14890 // AT4G33220 // AT5G47500 // AT5G23870 // AT3G14220 // AT1G41830 // AT5G45670 // AT1G62770 // AT5G26670 // AT2G01610 // AT4G19420 // AT1G02660 // AT1G29660 // AT3G49330 // AT5G04960 // AT1G53840 // AT2G06925 // AT3G48460 // AT1G54…
GO:0016787	F	hydrolase activity	148	989	3468	37767	6e-09	9.1e-07	// AT1G65310 // AT4G02290 // AT1G01300 // AT4G03210 // AT5G19100 // AT1G02810 // AT3G44320 // AT3G16370 // AT5G63810 // AT5G46450 // AT3G23810 // AT1G05800 // AT1G56670 // AT1G66270 // AT5G58480 // AT5G23870 // AT3G09260 // AT1G64390 // AT5G45670 // AT1G62770 // AT5G11650 // AT2G01610 // AT5G20250 // AT1G02660 // AT3G28345 // AT3G18080 // AT3G62740 // AT3G49330 // AT4G33920 // AT3G61820 // AT2G06…
GO:0031224	C	intrinsic to membrane	51	989	806	37767	2.9e-08	1.4e-06	// AT1G21880 // AT4G27520 // AT1G64760 // AT5G55730 // AT2G04780 // AT1G21090 // AT5G04310 // AT1G66090 // AT5G10430 // AT2G14890 // AT5G46450 // AT1G10550 // AT2G20142 // AT4G25010 // AT5G56540 // AT1G75000 // AT5G58480 // AT2G44300 // AT1G70990 // AT3G43960 // AT5G16910 // AT2G03240 // AT5G11250 // AT2G46890 // AT3G15720 // AT3G61640 // AT1G27950 // AT1G29980 // AT4G12730 // AT3G15350 // AT5G19…
GO:0016020	C	membrane	162	989	4068	37767	8.9e-08	3.8e-06	// AT3G61750 // AT1G01300 // AT3G28345 // AT1G21880 // AT5G20260 // AT3G27960 // AT5G54400 // AT5G46450 // AT1G04430 // AT2G20142 // AT3G59350 // AT3G18200 // AT4G21680 // AT4G01440 // AT3G27210 // AT5G58480 // AT2G38060 // AT2G34510 // AT2G16850 // AT4G29140 // AT5G11250 // AT3G08600 // AT3G14810 // AT5G17700 // AT3G18890 // AT1G71880 // AT1G12500 // AT5G54380 // AT1G55670 // AT4G19030 // AT1G20…
GO:0009605	P	response to external stimulus	34	989	429	37767	4.9e-08	8.7e-06	// AT3G28860 // AT1G80840 // AT2G24850 // AT1G32640 // AT3G44320 // AT5G46330 // AT2G30020 // AT3G45640 // AT3G44260 // AT5G57560 // AT1G17420 // AT1G05800 // AT1G01470 // AT5G64900 // AT5G60890 // AT2G06050 // AT1G66270 // AT2G06850 // AT5G53750 // AT5G37770 // AT1G76930 // AT1G72450 // AT5G24770 // AT5G13220 // AT3G61190 // AT1G20510 // AT2G20340 // AT5G42650 // AT2G34810 // AT3G15540 // AT2G46…
GO:0009628	P	response to abiotic stimulus	76	989	1471	37767	5e-08	8.7e-06	// AT2G38750 // AT3G50060 // AT3G49120 // AT2G35930 // AT3G50970 // AT4G14690 // AT1G32640 // AT4G38410 // AT4G37260 // AT4G38620 // AT1G20340 // AT2G39800 // AT2G23290 // AT3G17390 // AT3G45640 // AT5G57560 // AT2G23050 // AT4G37590 // AT1G58290 // AT5G66570 // AT3G26744 // AT4G27410 // AT5G60890 // AT1G12610 // AT4G12720 // AT4G03280 // AT4G21870 // AT4G25480 // AT3G27690 // AT2G06850 // AT3G48…
GO:0009664	P	plant-type cell wall organization	14	989	79	37767	1e-07	1.6e-05	// AT4G17030 // AT3G45970 // AT3G45960 // AT1G12560 // AT2G28950 // AT4G38400 // AT1G26770 // AT3G28550 // AT4G28250 // AT5G17420 // AT5G35190 // AT1G10550 // AT5G57560 // AT3G15370
GO:0005576	C	extracellular region	25	989	285	37767	5.2e-07	1.9e-05	// AT5G05340 // AT3G54400 // AT1G75880 // AT4G27520 // AT1G64670 // AT5G57625 // AT3G10080 // AT4G18510 // AT1G09310 // AT2G06850 // AT5G65870 // AT2G43620 // AT2G22860 // AT2G42840 // AT1G11545 // AT4G37800 // AT3G15356 // AT1G29660 // AT3G23805 // AT3G16370 // AT5G51750 // AT1G53840 // AT5G67070 // AT1G68560 // AT1G78830
GO:0010200	P	response to chitin	18	989	151	37767	3.8e-07	5.4e-05	// AT4G39070 // AT3G50060 // AT1G23030 // AT1G66160 // AT1G80840 // AT4G31800 // AT2G34600 // AT1G32640 // AT2G35930 // AT4G34410 // AT4G15975 // AT2G44840 // AT1G19050 // AT5G49520 // AT3G45640 // AT3G55980 // AT4G35480 // AT4G37260
GO:0042545	P	cell wall modification	16	989	123	37767	5.8e-07	7.7e-05	// AT4G17030 // AT3G45970 // AT3G45960 // AT5G04960 // AT1G12560 // AT2G28950 // AT5G47500 // AT1G02810 // AT4G38400 // AT5G46330 // AT1G26770 // AT4G28250 // AT1G10550 // AT2G47550 // AT3G49220 // AT3G15370
GO:0009725	P	response to hormone stimulus	54	989	982	37767	7.8e-07	9.7e-05	// AT2G38750 // AT3G50060 // AT4G38620 // AT3G50970 // AT5G65310 // AT5G15230 // AT3G16350 // AT3G28860 // AT5G44030 // AT2G44840 // AT4G01540 // AT3G45640 // AT5G57560 // AT1G69040 // AT2G46510 // AT1G76540 // AT5G64900 // AT5G60890 // AT1G32640 // AT4G27410 // AT2G06850 // AT3G48100 // AT5G37770 // AT1G19050 // AT3G50660 // AT5G62470 // AT1G76930 // AT1G17345 // AT4G34760 // AT5G59320 // AT3G47…
GO:0030599	F	pectinesterase activity	17	989	144	37767	8.9e-07	0.00011	// AT5G04960 // AT1G41830 // AT1G14890 // AT4G33220 // AT1G53840 // AT1G02810 // AT1G62770 // AT2G01610 // AT3G49330 // AT5G62350 // AT5G47500 // AT5G53370 // AT3G14310 // AT4G02330 // AT2G47550 // AT3G49220 // AT3G47380
GO:0032535	P	regulation of cellular component size	24	989	277	37767	1.1e-06	0.00012	// AT3G49120 // AT1G63030 // AT2G28950 // AT1G12040 // AT3G28860 // AT4G28250 // AT1G10550 // AT3G45970 // AT1G26770 // AT1G05800 // AT1G12610 // AT2G06850 // AT1G12560 // AT4G38400 // AT3G62720 // AT3G50660 // AT1G75780 // AT5G16910 // AT5G54380 // AT3G15370 // AT4G17030 // AT3G45960 // AT2G29890 // AT3G18000
GO:0090066	P	regulation of anatomical structure size	24	989	277	37767	1.1e-06	0.00012	// AT3G49120 // AT1G63030 // AT2G28950 // AT1G12040 // AT3G28860 // AT4G28250 // AT1G10550 // AT3G45970 // AT1G26770 // AT1G05800 // AT1G12610 // AT2G06850 // AT1G12560 // AT4G38400 // AT3G62720 // AT3G50660 // AT1G75780 // AT5G16910 // AT5G54380 // AT3G15370 // AT4G17030 // AT3G45960 // AT2G29890 // AT3G18000
GO:0008361	P	regulation of cell size	23	989	274	37767	2.9e-06	0.00026	// AT3G49120 // AT1G63030 // AT2G28950 // AT1G12040 // AT3G28860 // AT4G28250 // AT1G10550 // AT3G45970 // AT1G26770 // AT1G05800 // AT1G12610 // AT2G06850 // AT1G12560 // AT4G38400 // AT3G62720 // AT3G50660 // AT1G75780 // AT5G16910 // AT5G54380 // AT3G15370 // AT4G17030 // AT3G45960 // AT3G18000
GO:0009827	P	plant-type cell wall modification	10	989	50	37767	2.7e-06	0.00026	// AT4G17030 // AT3G45970 // AT3G45960 // AT1G12560 // AT2G28950 // AT4G38400 // AT1G26770 // AT4G28250 // AT1G10550 // AT3G15370
GO:0009620	P	response to fungus	17	989	158	37767	2.8e-06	0.00026	// AT2G37130 // AT3G49120 // AT1G05800 // AT2G43510 // AT4G31800 // AT5G42650 // AT2G34930 // AT2G06050 // AT4G18780 // AT5G44030 // AT5G38280 // AT5G45110 // AT2G30020 // AT3G25780 // AT1G80840 // AT1G17420 // AT3G09260
GO:0009828	P	plant-type cell wall loosening	9	989	40	37767	3.6e-06	0.00032	// AT4G17030 // AT3G45970 // AT3G45960 // AT1G12560 // AT2G28950 // AT4G38400 // AT1G26770 // AT4G28250 // AT3G15370
GO:0005886	C	plasma membrane	67	989	1456	37767	1.3e-05	0.00044	// AT2G38530 // AT4G16260 // AT3G28860 // AT5G42100 // AT1G30360 // AT1G33440 // AT5G41800 // AT5G55730 // AT4G20940 // AT3G28345 // AT3G27960 // AT1G27950 // AT3G23400 // AT4G33260 // AT1G10550 // AT1G04430 // AT2G45820 // AT3G59350 // AT4G21680 // AT4G27520 // AT1G72140 // AT3G49720 // AT3G22790 // AT1G64760 // AT3G27210 // AT5G58480 // AT1G75640 // AT2G44300 // AT4G12730 // AT5G25930 // AT5G64…
GO:0016049	P	cell growth	22	989	265	37767	5.6e-06	0.00046	// AT3G49120 // AT1G63030 // AT2G28950 // AT1G12040 // AT4G28250 // AT1G10550 // AT3G45970 // AT1G26770 // AT1G05800 // AT1G12610 // AT2G06850 // AT1G12560 // AT4G38400 // AT3G62720 // AT3G50660 // AT1G75780 // AT5G16910 // AT5G54380 // AT3G15370 // AT4G17030 // AT3G45960 // AT3G18000
GO:0048046	C	apoplast	17	989	182	37767	1.6e-05	0.00048	// AT5G05340 // AT5G51750 // AT3G54400 // AT4G27520 // AT3G16370 // AT1G09310 // AT3G15356 // AT4G18510 // AT1G11545 // AT3G10080 // AT2G43620 // AT1G29660 // AT3G23805 // AT1G68560 // AT1G78830 // AT4G37800 // AT5G67070
GO:0044425	C	membrane part	63	989	1360	37767	1.9e-05	0.00055	// AT1G21880 // AT4G27520 // AT1G64760 // AT5G55730 // AT2G04780 // AT1G21090 // AT4G04640 // AT5G04310 // AT1G66090 // AT5G10430 // AT2G14890 // AT3G61470 // AT4G33260 // AT5G46450 // AT4G12800 // AT1G10550 // AT5G16910 // AT2G20142 // AT4G25010 // AT5G56540 // AT5G66570 // AT4G01540 // AT5G58480 // AT2G44300 // AT1G70990 // AT4G12730 // AT1G55670 // AT1G18650 // AT2G03240 // AT1G31330 // AT5G11…
GO:0009694	P	jasmonic acid metabolic process	8	989	34	37767	9.6e-06	0.00072	// AT5G07010 // AT1G05800 // AT5G42650 // AT2G06050 // AT3G25780 // AT1G20510 // AT1G17420 // AT1G72520
GO:0040007	P	growth	25	989	340	37767	9.5e-06	0.00072	// AT3G49120 // AT1G63030 // AT2G28950 // AT1G12040 // AT4G28250 // AT1G10550 // AT1G17420 // AT3G45970 // AT1G26770 // AT1G05800 // AT1G12610 // AT2G06850 // AT4G28190 // AT1G12560 // AT4G38400 // AT3G62720 // AT3G50660 // AT1G75780 // AT5G16910 // AT5G54380 // AT3G15370 // AT4G17030 // AT3G45960 // AT3G18000 // AT1G72520
GO:0046906	F	tetrapyrrole binding	15	989	136	37767	8.2e-06	0.0009	// AT5G05340 // AT1G29930 // AT4G14690 // AT2G38380 // AT3G27690 // AT3G22840 // AT2G37130 // AT1G61520 // AT4G26010 // AT1G30870 // AT1G14550 // AT1G44970 // AT2G34060 // AT3G61470 // AT4G30170
GO:0016758	F	transferase activity, transferring hexosyl groups	25	989	340	37767	9.5e-06	0.00091	// AT4G03210 // AT4G02130 // AT3G44990 // AT5G44030 // AT3G21560 // AT3G56000 // AT5G57560 // AT1G12990 // AT2G06850 // AT1G24170 // AT1G23480 // AT1G67880 // AT3G50760 // AT3G43190 // AT1G11545 // AT4G37800 // AT3G15350 // AT5G16910 // AT3G27540 // AT3G28180 // AT2G35710 // AT1G70090 // AT4G18780 // AT1G07260 // AT5G17420
GO:0006952	P	defense response	42	989	766	37767	1.4e-05	0.001	// AT2G02100 // AT3G49120 // AT2G35930 // AT2G26380 // AT4G12720 // AT2G34930 // AT5G46330 // AT5G44030 // AT1G66090 // AT3G44630 // AT5G06870 // AT5G46450 // AT2G30020 // AT5G22690 // AT5G42650 // AT1G65390 // AT2G20142 // AT1G17420 // AT1G70830 // AT1G05800 // AT5G24780 // AT4G22212 // AT5G64900 // AT5G60890 // AT1G19610 // AT1G71400 // AT5G50250 // AT5G37770 // AT4G23670 // AT1G19180 // AT5G11…
GO:0009737	P	response to abscisic acid stimulus	26	989	378	37767	1.9e-05	0.0013	// AT2G38750 // AT3G50060 // AT4G38620 // AT3G50970 // AT5G65310 // AT5G62470 // AT2G39800 // AT3G45640 // AT5G60890 // AT1G32640 // AT4G27410 // AT5G37770 // AT1G76930 // AT2G05520 // AT5G59320 // AT3G47600 // AT5G25610 // AT4G18010 // AT3G59220 // AT1G20450 // AT2G32690 // AT2G46510 // AT4G34990 // AT4G34710 // AT3G22060 // AT4G37260
GO:0016684	F	oxidoreductase activity, acting on peroxide as acceptor	14	989	127	37767	1.6e-05	0.0013	// AT5G05340 // AT2G37130 // AT3G49120 // AT4G30170 // AT1G07890 // AT5G67400 // AT2G38380 // AT4G26010 // AT1G30870 // AT1G14550 // AT1G44970 // AT2G34060 // AT4G08390 // AT5G51890
GO:0004601	F	peroxidase activity	14	989	127	37767	1.6e-05	0.0013	// AT5G05340 // AT2G37130 // AT3G49120 // AT4G30170 // AT1G07890 // AT5G67400 // AT2G38380 // AT4G26010 // AT1G30870 // AT1G14550 // AT1G44970 // AT2G34060 // AT4G08390 // AT5G51890
GO:0031407	P	oxylipin metabolic process	8	989	39	37767	2.3e-05	0.0015	// AT5G07010 // AT1G05800 // AT5G42650 // AT2G06050 // AT3G25780 // AT1G20510 // AT1G17420 // AT1G72520
GO:0016209	F	antioxidant activity	15	989	150	37767	2.4e-05	0.0017	// AT5G05340 // AT2G37130 // AT3G49120 // AT4G25100 // AT1G07890 // AT5G67400 // AT2G38380 // AT4G26010 // AT1G30870 // AT1G14550 // AT1G44970 // AT2G34060 // AT4G08390 // AT5G51890 // AT4G30170
GO:0009695	P	jasmonic acid biosynthetic process	7	989	29	37767	3e-05	0.0019	// AT1G05800 // AT5G42650 // AT2G06050 // AT3G25780 // AT1G20510 // AT1G17420 // AT1G72520
GO:0010035	P	response to inorganic substance	21	989	279	37767	3.5e-05	0.0022	// AT1G13930 // AT3G50060 // AT4G38620 // AT4G25100 // AT1G07890 // AT5G62470 // AT5G24770 // AT3G16350 // AT3G56090 // AT2G39450 // AT3G47600 // AT1G20340 // AT5G01600 // AT4G34990 // AT2G23290 // AT4G23670 // AT2G28210 // AT5G37770 // AT4G33020 // AT4G19030 // AT4G37260
GO:0009743	P	response to carbohydrate stimulus	19	989	240	37767	4.3e-05	0.0026	// AT4G39070 // AT3G50060 // AT1G23030 // AT1G66160 // AT1G80840 // AT4G31800 // AT2G34600 // AT1G32640 // AT2G35930 // AT4G34410 // AT4G30850 // AT4G15975 // AT2G44840 // AT1G19050 // AT5G49520 // AT3G45640 // AT3G55980 // AT4G35480 // AT4G37260
GO:0016757	F	transferase activity, transferring glycosyl groups	32	989	544	37767	4.1e-05	0.0026	// AT4G03210 // AT4G02130 // AT3G44990 // AT5G44030 // AT4G26510 // AT3G21560 // AT3G56000 // AT5G57560 // AT1G12990 // AT3G18660 // AT2G06850 // AT1G24170 // AT5G41460 // AT1G23480 // AT1G67880 // AT5G11160 // AT3G50760 // AT3G62720 // AT3G43190 // AT1G11545 // AT4G37800 // AT3G15350 // AT5G16910 // AT3G27540 // AT1G78280 // AT3G28180 // AT2G35710 // AT1G70090 // AT4G18780 // AT1G07260 // AT3G53…
GO:0046658	C	anchored to plasma membrane	7	989	36	37767	0.0001	0.0026	// AT4G27520 // AT1G64760 // AT5G58480 // AT5G64080 // AT3G15720 // AT5G19230 // AT5G15350
GO:0048589	P	developmental growth	19	989	242	37767	4.8e-05	0.0028	// AT4G17030 // AT3G45970 // AT3G49120 // AT1G75780 // AT1G12560 // AT2G28950 // AT4G38400 // AT1G12040 // AT3G45960 // AT3G50660 // AT3G18000 // AT2G06850 // AT3G62720 // AT5G16910 // AT5G54380 // AT4G28250 // AT1G26770 // AT4G28190 // AT3G15370
GO:0031408	P	oxylipin biosynthetic process	7	989	32	37767	5.2e-05	0.0028	// AT1G05800 // AT5G42650 // AT2G06050 // AT3G25780 // AT1G20510 // AT1G17420 // AT1G72520
GO:0006979	P	response to oxidative stress	23	989	332	37767	5.1e-05	0.0028	// AT5G05340 // AT5G26030 // AT1G32640 // AT2G39800 // AT1G44970 // AT3G45640 // AT4G12720 // AT1G30870 // AT1G14550 // AT5G37770 // AT2G34060 // AT5G51890 // AT4G30170 // AT5G24770 // AT3G47860 // AT4G25100 // AT2G16500 // AT1G07890 // AT3G56090 // AT4G26010 // AT1G11210 // AT5G01600 // AT4G34710
GO:0009607	P	response to biotic stimulus	35	989	638	37767	7e-05	0.0034	// AT3G49120 // AT1G80840 // AT4G12720 // AT2G34930 // AT5G46330 // AT5G44030 // AT4G19690 // AT5G51600 // AT2G30020 // AT3G45640 // AT3G44260 // AT3G45680 // AT1G17420 // AT1G70830 // AT1G05800 // AT5G42650 // AT5G60890 // AT2G06050 // AT1G71880 // AT4G23670 // AT1G19180 // AT3G09260 // AT5G24770 // AT1G72140 // AT5G45110 // AT4G24260 // AT3G25780 // AT5G38280 // AT3G26460 // AT2G37130 // AT2G43…
GO:0060560	P	developmental growth involved in morphogenesis	16	989	186	37767	6.9e-05	0.0034	// AT4G17030 // AT3G45970 // AT3G49120 // AT1G75780 // AT1G12560 // AT2G28950 // AT4G38400 // AT1G12040 // AT3G45960 // AT3G50660 // AT3G18000 // AT2G06850 // AT5G54380 // AT4G28250 // AT1G26770 // AT3G15370
GO:0065008	P	regulation of biological quality	36	989	665	37767	7.1e-05	0.0034	// AT3G49120 // AT1G63030 // AT2G28950 // AT2G45400 // AT1G10550 // AT3G28860 // AT4G19690 // AT1G20340 // AT4G28250 // AT3G63110 // AT5G21482 // AT3G45970 // AT1G26770 // AT1G75780 // AT1G12610 // AT2G06850 // AT3G50660 // AT1G55670 // AT1G12040 // AT1G12560 // AT4G38400 // AT3G62720 // AT1G77690 // AT1G05800 // AT3G61190 // AT5G54380 // AT4G31820 // AT3G15370 // AT4G17030 // AT3G45960 // AT3G56…
GO:0009826	P	unidimensional cell growth	16	989	186	37767	6.9e-05	0.0034	// AT4G17030 // AT3G45970 // AT3G49120 // AT1G75780 // AT1G12560 // AT2G28950 // AT4G38400 // AT1G12040 // AT3G45960 // AT3G50660 // AT3G18000 // AT2G06850 // AT5G54380 // AT4G28250 // AT1G26770 // AT3G15370
GO:0004190	F	aspartic-type endopeptidase activity	11	989	92	37767	6.7e-05	0.0034	// AT2G39710 // AT1G01300 // AT5G19100 // AT3G61820 // AT5G37540 // AT3G25700 // AT5G19110 // AT5G10770 // AT4G16563 // AT5G07030 // AT3G54400
GO:0070001	F	aspartic-type peptidase activity	11	989	92	37767	6.7e-05	0.0034	// AT2G39710 // AT1G01300 // AT5G19100 // AT3G61820 // AT5G37540 // AT3G25700 // AT5G19110 // AT5G10770 // AT4G16563 // AT5G07030 // AT3G54400
GO:0016762	F	xyloglucan:xyloglucosyl transferase activity	6	989	22	37767	6.3e-05	0.0034	// AT4G03210 // AT3G44990 // AT1G11545 // AT4G37800 // AT2G06850 // AT5G57560
GO:0009791	P	post-embryonic development	37	989	705	37767	0.0001	0.0048	// AT3G50060 // AT3G28860 // AT2G34790 // AT5G18560 // AT3G45640 // AT5G05950 // AT4G30090 // AT4G37590 // AT4G31820 // AT2G46870 // AT3G26744 // AT2G02820 // AT1G77690 // AT5G37770 // AT5G01040 // AT1G19180 // AT4G28190 // AT5G53290 // AT2G28550 // AT1G75520 // AT1G69770 // AT5G54380 // AT4G19230 // AT4G18010 // AT3G54810 // AT2G16500 // AT1G07890 // AT1G80730 // AT4G00310 // AT3G18000 // AT1G14…
GO:0009409	P	response to cold	22	989	328	37767	0.00011	0.0052	// AT3G50970 // AT4G25490 // AT3G17390 // AT3G45640 // AT5G57560 // AT3G26744 // AT4G25480 // AT5G37770 // AT1G25450 // AT4G17090 // AT3G61190 // AT1G17190 // AT4G25470 // AT1G20450 // AT2G16500 // AT3G22840 // AT1G09560 // AT5G01600 // AT4G34710 // AT4G30650 // AT5G63770 // AT5G16910
GO:0010038	P	response to metal ion	18	989	238	37767	0.00012	0.0052	// AT1G13930 // AT3G50060 // AT4G38620 // AT4G25100 // AT5G62470 // AT5G24770 // AT3G16350 // AT3G56090 // AT2G39450 // AT3G47600 // AT1G20340 // AT5G01600 // AT4G34990 // AT2G23290 // AT4G23670 // AT5G37770 // AT4G33020 // AT4G37260
GO:0016538	F	cyclin-dependent protein kinase regulator activity	7	989	37	37767	0.00012	0.0056	// AT4G35620 // AT1G76310 // AT3G11520 // AT2G26760 // AT5G06150 // AT5G11300 // AT1G70210
GO:0015833	P	peptide transport	9	989	68	37767	0.00015	0.0064	// AT4G27730 // AT3G45680 // AT1G33440 // AT1G22570 // AT1G72140 // AT1G22550 // AT3G45700 // AT1G65730 // AT4G21680
GO:0006857	P	oligopeptide transport	9	989	68	37767	0.00015	0.0064	// AT4G27730 // AT3G45680 // AT1G33440 // AT1G22570 // AT1G72140 // AT1G22550 // AT3G45700 // AT1G65730 // AT4G21680
GO:0016759	F	cellulose synthase activity	7	989	39	37767	0.00015	0.007	// AT4G18780 // AT5G44030 // AT3G56000 // AT5G16910 // AT1G23480 // AT3G28180 // AT5G17420
GO:0005975	P	carbohydrate metabolic process	42	989	866	37767	0.00019	0.0075	// AT3G18660 // AT3G01260 // AT3G06770 // AT4G02130 // AT3G44320 // AT5G44030 // AT2G43870 // AT5G25980 // AT1G12990 // AT5G64570 // AT1G12140 // AT1G62540 // AT5G60890 // AT1G64760 // AT5G58480 // AT1G12900 // AT5G10100 // AT1G66430 // AT1G24170 // AT5G26000 // AT4G39770 // AT1G67880 // AT3G50760 // AT3G62720 // AT3G55430 // AT1G11545 // AT4G37800 // AT4G23820 // AT4G17090 // AT3G15350 // AT5G16…
GO:0015979	P	photosynthesis	14	989	162	37767	0.00018	0.0075	// AT1G29930 // AT5G66570 // AT3G27690 // AT1G31330 // AT4G04640 // AT3G61470 // AT4G03280 // AT1G61520 // AT5G01600 // AT4G12800 // AT2G46820 // AT1G55670 // AT1G60950 // AT3G56090
GO:0044262	P	cellular carbohydrate metabolic process	25	989	417	37767	0.00021	0.0083	// AT3G01260 // AT3G44320 // AT5G44030 // AT5G25980 // AT1G12990 // AT1G12140 // AT1G62540 // AT5G60890 // AT3G18660 // AT1G12900 // AT5G10100 // AT1G66430 // AT5G26000 // AT4G39770 // AT1G67880 // AT3G62720 // AT3G43190 // AT1G11545 // AT4G37800 // AT4G17090 // AT5G41080 // AT3G27540 // AT4G18010 // AT4G18780 // AT5G17420
GO:0051707	P	response to other organism	32	989	599	37767	0.00022	0.0085	// AT3G49120 // AT1G80840 // AT4G12720 // AT2G34930 // AT5G46330 // AT5G44030 // AT4G19690 // AT5G51600 // AT2G30020 // AT3G45640 // AT1G17420 // AT3G45680 // AT1G05800 // AT5G42650 // AT5G60890 // AT2G06050 // AT1G71880 // AT4G23670 // AT1G19180 // AT3G09260 // AT5G24770 // AT1G72140 // AT5G45110 // AT4G24260 // AT3G25780 // AT5G38280 // AT2G37130 // AT2G43510 // AT4G31800 // AT4G18780 // AT5G01…
GO:0050832	P	defense response to fungus	11	989	108	37767	0.00024	0.009	// AT2G37130 // AT3G49120 // AT1G05800 // AT2G43510 // AT4G31800 // AT2G34930 // AT4G18780 // AT5G44030 // AT5G45110 // AT2G30020 // AT1G80840
GO:0051726	P	regulation of cell cycle	12	989	127	37767	0.00025	0.009	// AT2G45080 // AT4G35620 // AT1G76540 // AT4G37630 // AT1G76310 // AT3G60550 // AT3G11520 // AT1G70210 // AT2G33560 // AT5G06150 // AT5G11300 // AT2G26760
GO:0044036	P	cell wall macromolecule metabolic process	7	989	45	37767	0.00034	0.012	// AT1G21880 // AT1G51940 // AT3G16920 // AT3G01840 // AT1G68560 // AT5G64570 // AT5G17420
GO:0006970	P	response to osmotic stress	24	989	408	37767	0.00036	0.013	// AT2G38750 // AT3G50060 // AT4G38620 // AT4G12720 // AT3G16350 // AT2G39800 // AT2G23290 // AT3G45640 // AT5G60890 // AT1G12610 // AT5G62470 // AT4G23670 // AT5G24770 // AT3G47600 // AT5G25610 // AT1G13930 // AT2G16500 // AT4G16260 // AT2G38380 // AT4G18780 // AT4G34990 // AT4G34710 // AT4G30650 // AT4G37260
GO:0009522	C	photosystem I	5	989	22	37767	0.00054	0.013	// AT1G55670 // AT1G31330 // AT3G61470 // AT4G12800 // AT2G46820
GO:0019748	P	secondary metabolic process	27	989	489	37767	0.00041	0.014	// AT5G47990 // AT1G62540 // AT1G32640 // AT3G44320 // AT5G25980 // AT1G20510 // AT5G66220 // AT3G17390 // AT3G45640 // AT3G53130 // AT1G12140 // AT5G48010 // AT5G60890 // AT5G14700 // AT5G26000 // AT1G55670 // AT4G11190 // AT5G08640 // AT1G17190 // AT4G19230 // AT3G57010 // AT4G30470 // AT4G18780 // AT2G45400 // AT1G77520 // AT3G51240 // AT2G29440
GO:0009751	P	response to salicylic acid stimulus	15	989	200	37767	0.00045	0.015	// AT5G62470 // AT4G38620 // AT1G80840 // AT4G31800 // AT3G50060 // AT5G60890 // AT4G18780 // AT3G47600 // AT5G44030 // AT4G34990 // AT3G61190 // AT2G32690 // AT4G37260 // AT1G76930 // AT2G05520
GO:0048869	P	cellular developmental process	28	989	520	37767	0.00047	0.016	// AT3G49120 // AT2G28950 // AT2G34790 // AT1G12040 // AT4G28250 // AT3G45970 // AT1G26770 // AT1G75780 // AT3G26744 // AT2G02820 // AT5G65870 // AT2G06850 // AT3G62680 // AT1G19050 // AT2G22860 // AT4G35350 // AT1G12560 // AT4G38400 // AT3G62720 // AT3G50660 // AT5G16910 // AT5G54380 // AT3G15370 // AT4G17030 // AT3G45960 // AT3G18000 // AT1G14350 // AT5G57800
GO:0006633	P	fatty acid biosynthetic process	12	989	140	37767	0.00056	0.018	// AT5G38020 // AT1G05800 // AT5G42650 // AT2G06050 // AT3G25780 // AT2G15090 // AT2G29980 // AT1G20510 // AT1G17420 // AT1G51500 // AT5G57800 // AT1G72520
GO:0065007	P	biological regulation	144	989	4188	37767	0.00057	0.018	// AT5G49520 // AT3G50060 // AT5G06870 // AT3G24310 // AT4G14690 // AT5G15230 // AT2G34930 // AT4G28250 // AT5G46450 // AT1G80840 // AT2G20142 // AT5G21482 // AT5G43650 // AT1G76310 // AT3G45970 // AT4G18510 // AT1G05800 // AT3G26744 // AT2G19780 // AT4G25480 // AT1G19050 // AT1G74500 // AT3G07000 // AT1G19180 // AT1G70210 // AT4G37780 // AT5G23280 // AT5G11250 // AT4G38400 // AT5G21960 // AT3G03…
GO:0019887	F	protein kinase regulator activity	7	989	47	37767	0.00043	0.018	// AT4G35620 // AT1G76310 // AT3G11520 // AT2G26760 // AT5G06150 // AT5G11300 // AT1G70210
GO:0006869	P	lipid transport	13	989	163	37767	0.00063	0.02	// AT2G38530 // AT3G22120 // AT2G38540 // AT3G51600 // AT1G27950 // AT5G64080 // AT3G53980 // AT1G17840 // AT2G44300 // AT1G12090 // AT3G43720 // AT5G01870 // AT4G12520
GO:0016051	P	carbohydrate biosynthetic process	18	989	277	37767	0.00065	0.02	// AT3G62720 // AT1G62540 // AT2G35710 // AT1G70090 // AT5G60890 // AT3G50760 // AT4G18780 // AT3G43190 // AT5G44030 // AT4G17090 // AT5G10100 // AT5G16910 // AT1G24170 // AT3G15350 // AT1G12140 // AT4G39770 // AT4G02130 // AT5G17420
GO:0030234	F	enzyme regulator activity	22	989	367	37767	0.00049	0.02	// AT2G02100 // AT1G02810 // AT4G04640 // AT3G49330 // AT5G62350 // AT1G76310 // AT1G14890 // AT4G00080 // AT3G11520 // AT5G06150 // AT1G70210 // AT2G46710 // AT3G47380 // AT1G62770 // AT2G01610 // AT2G26760 // AT4G35620 // AT5G04960 // AT2G43510 // AT5G11300 // AT2G47550 // AT3G49220
GO:0006629	P	lipid metabolic process	39	989	841	37767	0.00071	0.022	// AT3G61580 // AT4G18780 // AT5G07010 // AT3G16370 // AT3G07960 // AT1G20510 // AT1G09390 // AT3G53130 // AT1G17420 // AT5G48010 // AT1G05800 // AT1G56670 // AT5G42650 // AT1G01600 // AT2G06050 // AT5G14700 // AT3G14220 // AT3G25780 // AT3G23470 // AT1G25450 // AT5G45670 // AT2G46890 // AT2G29980 // AT3G50660 // AT1G02660 // AT1G29660 // AT5G41080 // AT4G19230 // AT5G38020 // AT5G16010 // AT5G47…
GO:0042398	P	cellular amino acid derivative biosynthetic process	16	989	233	37767	0.00073	0.022	// AT4G30470 // AT4G34710 // AT1G32640 // AT5G60890 // AT2G36880 // AT2G45400 // AT1G77520 // AT5G08640 // AT3G18000 // AT4G08040 // AT3G51240 // AT4G37770 // AT5G66220 // AT5G14700 // AT3G17390 // AT4G11190
GO:0031226	C	intrinsic to plasma membrane	8	989	74	37767	0.0012	0.025	// AT4G27520 // AT1G64760 // AT5G58480 // AT5G64080 // AT3G15720 // AT5G19230 // AT1G10550 // AT5G15350
GO:0012505	C	endomembrane system	119	989	3416	37767	0.0011	0.025	// AT3G05470 // AT1G54890 // AT2G41890 // AT5G19100 // AT1G02810 // AT3G49330 // AT1G44970 // AT5G35190 // AT3G18200 // AT2G24130 // AT5G17847 // AT1G56670 // AT2G19780 // AT5G41400 // AT1G30870 // AT5G56980 // AT5G10946 // AT3G01840 // AT5G47500 // AT1G62770 // AT2G01610 // AT3G23450 // AT2G43690 // AT4G12870 // AT5G14920 // AT4G26010 // AT2G03830 // AT1G61667 // AT5G22860 // AT1G70130 // AT2G26…
GO:0019207	F	kinase regulator activity	7	989	51	37767	0.00067	0.026	// AT4G35620 // AT1G76310 // AT3G11520 // AT2G26760 // AT5G06150 // AT5G11300 // AT1G70210
GO:0004175	F	endopeptidase activity	17	989	257	37767	0.00075	0.027	// AT1G32970 // AT2G39710 // AT1G01300 // AT5G19100 // AT3G61820 // AT2G05920 // AT3G25700 // AT3G43960 // AT5G10770 // AT1G49630 // AT4G16563 // AT5G19110 // AT5G07030 // AT5G37540 // AT3G54400 // AT4G11320 // AT3G48350
GO:0009415	P	response to water	16	989	240	37767	0.00098	0.029	// AT1G20450 // AT2G35930 // AT3G50970 // AT1G32640 // AT5G25610 // AT4G38410 // AT1G01470 // AT4G18780 // AT4G25480 // AT4G27410 // AT2G39800 // AT2G21490 // AT4G02200 // AT4G25490 // AT5G59320 // AT2G05520
GO:0016168	F	chlorophyll binding	6	989	38	37767	0.00084	0.029	// AT1G29930 // AT4G14690 // AT3G27690 // AT3G22840 // AT3G61470 // AT1G61520
GO:0009651	P	response to salt stress	21	989	366	37767	0.0011	0.032	// AT1G13930 // AT3G50060 // AT4G38620 // AT2G16500 // AT4G16260 // AT2G38380 // AT5G24770 // AT3G16350 // AT1G12610 // AT4G12720 // AT3G47600 // AT5G25610 // AT2G39800 // AT4G34990 // AT2G23290 // AT4G34710 // AT5G60890 // AT5G62470 // AT4G23670 // AT4G30650 // AT4G37260
GO:0006790	P	sulfur metabolic process	15	989	220	37767	0.0011	0.032	// AT1G62540 // AT5G60890 // AT2G36880 // AT3G44320 // AT3G03630 // AT4G37770 // AT5G43780 // AT5G25980 // AT4G08040 // AT3G03780 // AT3G17390 // AT3G45640 // AT5G26000 // AT5G17920 // AT1G12140
GO:0005199	F	structural constituent of cell wall	6	989	39	37767	0.00095	0.032	// AT1G26770 // AT1G12040 // AT3G28550 // AT4G13340 // AT5G35190 // AT1G76930
GO:0004857	F	enzyme inhibitor activity	13	989	173	37767	0.001	0.033	// AT2G02100 // AT5G04960 // AT2G43510 // AT1G14890 // AT3G47380 // AT1G02810 // AT1G62770 // AT4G00080 // AT2G01610 // AT5G62350 // AT3G49330 // AT2G47550 // AT3G49220
GO:0016837	F	carbon-oxygen lyase activity, acting on polysaccharides	5	989	27	37767	0.0012	0.035	// AT1G04680 // AT5G48900 // AT5G04310 // AT3G09540 // AT3G27400
GO:0030570	F	pectate lyase activity	5	989	27	37767	0.0012	0.035	// AT1G04680 // AT5G48900 // AT5G04310 // AT3G09540 // AT3G27400
GO:0009055	F	electron carrier activity	18	989	294	37767	0.0012	0.035	// AT5G05340 // AT5G26330 // AT4G30170 // AT2G38380 // AT2G34790 // AT4G31840 // AT2G37130 // AT4G26010 // AT4G03280 // AT1G30870 // AT1G14550 // AT1G44970 // AT5G15350 // AT2G34060 // AT2G34810 // AT3G44190 // AT1G72520 // AT4G27520
GO:0048856	P	anatomical structure development	67	989	1726	37767	0.0013	0.036	// AT3G50060 // AT3G49120 // AT1G63030 // AT2G28950 // AT2G34790 // AT1G12040 // AT3G28860 // AT5G18560 // AT4G28250 // AT2G39800 // AT5G51600 // AT5G64530 // AT3G45640 // AT5G05950 // AT4G30090 // AT1G77690 // AT5G48010 // AT3G45970 // AT1G26770 // AT1G75780 // AT2G46870 // AT3G26744 // AT2G02820 // AT1G12610 // AT4G01540 // AT3G14362 // AT5G65870 // AT2G06850 // AT3G62680 // AT3G50660 // AT5G01…
GO:0006631	P	fatty acid metabolic process	15	989	225	37767	0.0014	0.038	// AT5G38020 // AT5G07010 // AT1G05800 // AT1G25450 // AT5G42650 // AT1G01600 // AT2G06050 // AT3G25780 // AT2G15090 // AT2G29980 // AT1G20510 // AT1G17420 // AT1G51500 // AT5G57800 // AT1G72520
GO:0009266	P	response to temperature stimulus	25	989	485	37767	0.0016	0.043	// AT3G50970 // AT3G17390 // AT3G45640 // AT5G57560 // AT3G26744 // AT4G25470 // AT4G25480 // AT5G37770 // AT5G16910 // AT5G01600 // AT1G25450 // AT4G17090 // AT3G61190 // AT1G17190 // AT4G21870 // AT1G20450 // AT2G16500 // AT1G07890 // AT3G22840 // AT1G09560 // AT2G27140 // AT4G34710 // AT4G30650 // AT5G63770 // AT4G25490
GO:0009631	P	cold acclimation	5	989	29	37767	0.0016	0.043	// AT4G25480 // AT1G20450 // AT3G50970 // AT4G25470 // AT4G25490
GO:0005506	F	iron ion binding	12	989	161	37767	0.0017	0.044	// AT5G05340 // AT2G37130 // AT4G30170 // AT2G38380 // AT3G56090 // AT4G26010 // AT1G30870 // AT1G14550 // AT1G44970 // AT5G01600 // AT2G34060 // AT1G72520
GO:0020037	F	heme binding	9	989	97	37767	0.0016	0.044	// AT5G05340 // AT2G37130 // AT2G34060 // AT2G38380 // AT4G26010 // AT1G30870 // AT1G14550 // AT1G44970 // AT4G30170
GO:0016491	F	oxidoreductase activity	58	989	1463	37767	0.0017	0.044	// AT2G46760 // AT1G58290 // AT3G61580 // AT5G47990 // AT2G19800 // AT2G17845 // AT3G49120 // AT1G12140 // AT2G39800 // AT1G44970 // AT5G14700 // AT2G34810 // AT3G53130 // AT5G21482 // AT4G08390 // AT1G62540 // AT3G12900 // AT5G01190 // AT5G66570 // AT1G01600 // AT2G06050 // AT3G51240 // AT1G12900 // AT1G30870 // AT1G14550 // AT2G34060 // AT5G01040 // AT5G05340 // AT2G34490 // AT1G64710 // AT4G30…
GO:0009269	P	response to desiccation	5	989	30	37767	0.0018	0.048	// AT5G25610 // AT1G01470 // AT2G39800 // AT2G05520 // AT1G32640
GO:0009767	P	photosynthetic electron transport chain	6	989	46	37767	0.002	0.051	// AT5G66570 // AT4G04640 // AT4G03280 // AT2G46820 // AT1G55670 // AT1G60950
GO:0000902	P	cell morphogenesis	16	989	259	37767	0.002	0.051	// AT4G17030 // AT3G45970 // AT3G49120 // AT1G75780 // AT1G12560 // AT2G28950 // AT4G38400 // AT1G12040 // AT3G45960 // AT3G50660 // AT3G18000 // AT2G06850 // AT5G54380 // AT4G28250 // AT1G26770 // AT3G15370
GO:0051704	P	multi-organism process	35	989	776	37767	0.002	0.051	// AT3G49120 // AT2G41890 // AT1G80840 // AT4G12720 // AT2G34930 // AT5G46330 // AT5G44030 // AT4G19690 // AT5G51600 // AT2G30020 // AT3G45640 // AT1G17420 // AT3G45680 // AT1G05800 // AT5G42650 // AT5G60890 // AT2G06050 // AT1G71880 // AT4G23670 // AT1G19180 // AT3G09260 // AT1G25450 // AT5G24770 // AT1G72140 // AT5G45110 // AT4G24260 // AT5G65630 // AT3G25780 // AT5G38280 // AT2G37130 // AT2G43…
GO:0046910	F	pectinesterase inhibitor activity	7	989	64	37767	0.0022	0.055	// AT1G14890 // AT3G47380 // AT1G62770 // AT4G00080 // AT3G49330 // AT5G62350 // AT2G01610
GO:0060089	F	molecular transducer activity	22	989	422	37767	0.0026	0.061	// AT1G12040 // AT5G46330 // AT1G66090 // AT3G44630 // AT4G33260 // AT5G46450 // AT3G45640 // AT2G20142 // AT2G23050 // AT4G37590 // AT3G48100 // AT1G19050 // AT5G11250 // AT4G30850 // AT4G33270 // AT3G23805 // AT5G22690 // AT4G31820 // AT5G38280 // AT5G66560 // AT5G67070 // AT5G62920
GO:0004871	F	signal transducer activity	22	989	422	37767	0.0026	0.061	// AT1G12040 // AT5G46330 // AT1G66090 // AT3G44630 // AT4G33260 // AT5G46450 // AT3G45640 // AT2G20142 // AT2G23050 // AT4G37590 // AT3G48100 // AT1G19050 // AT5G11250 // AT4G30850 // AT4G33270 // AT3G23805 // AT5G22690 // AT4G31820 // AT5G38280 // AT5G66560 // AT5G67070 // AT5G62920
GO:0016137	P	glycoside metabolic process	9	989	104	37767	0.0025	0.062	// AT1G62540 // AT5G60890 // AT3G44320 // AT3G43190 // AT5G25980 // AT5G10100 // AT5G26000 // AT1G12140 // AT4G39770
GO:0044459	C	plasma membrane part	14	989	222	37767	0.0032	0.063	// AT4G27520 // AT1G64760 // AT5G42100 // AT5G58480 // AT5G64080 // AT3G15720 // AT1G17840 // AT4G33260 // AT4G33270 // AT5G19230 // AT1G10550 // AT1G18650 // AT5G23730 // AT5G15350
GO:0007166	P	cell surface receptor linked signaling pathway	12	989	172	37767	0.0029	0.07	// AT2G24130 // AT1G68400 // AT5G51560 // AT3G56100 // AT5G46330 // AT1G78280 // AT1G75640 // AT1G17750 // AT3G45640 // AT1G64210 // AT5G63770 // AT5G43020
GO:0006073	P	cellular glucan metabolic process	8	989	87	37767	0.003	0.072	// AT3G62720 // AT4G18780 // AT5G44030 // AT1G11545 // AT4G37800 // AT4G17090 // AT3G18660 // AT5G17420
GO:0016829	F	lyase activity	22	989	430	37767	0.0033	0.074	// AT5G26030 // AT3G09540 // AT3G03630 // AT3G44320 // AT5G04310 // AT5G42650 // AT1G08080 // AT4G08040 // AT1G74010 // AT4G34710 // AT2G28210 // AT3G57010 // AT1G04680 // AT3G27400 // AT2G16500 // AT1G11790 // AT2G20340 // AT4G20230 // AT4G37770 // AT5G48900 // AT4G20210 // AT1G33750
GO:0005976	P	polysaccharide metabolic process	11	989	152	37767	0.0032	0.077	// AT3G62720 // AT4G18780 // AT5G44030 // AT1G11545 // AT4G37800 // AT4G17090 // AT5G16910 // AT3G18660 // AT1G68560 // AT5G64570 // AT5G17420
GO:0044042	P	glucan metabolic process	8	989	89	37767	0.0034	0.08	// AT3G62720 // AT4G18780 // AT5G44030 // AT1G11545 // AT4G37800 // AT4G17090 // AT3G18660 // AT5G17420
GO:0004693	F	cyclin-dependent protein kinase activity	5	989	36	37767	0.0038	0.082	// AT2G45080 // AT4G37630 // AT3G60550 // AT1G76540 // AT3G54710
GO:0019825	F	oxygen binding	15	989	255	37767	0.0043	0.091	// AT4G31940 // AT4G37400 // AT4G37410 // AT5G42650 // AT5G38450 // AT3G20940 // AT5G47990 // AT3G48520 // AT4G15110 // AT1G01600 // AT4G19230 // AT3G53130 // AT2G34490 // AT1G12740 // AT3G53280
GO:0046527	F	glucosyltransferase activity	10	989	136	37767	0.0044	0.091	// AT4G18780 // AT1G07260 // AT3G43190 // AT3G21560 // AT3G56000 // AT5G16910 // AT5G44030 // AT1G23480 // AT3G28180 // AT5G17420
GO:0032502	P	developmental process	82	989	2304	37767	0.004	0.092	// AT3G61590 // AT3G50060 // AT3G49120 // AT1G63030 // AT2G28950 // AT2G34790 // AT4G16750 // AT1G12040 // AT3G28860 // AT5G18560 // AT4G28250 // AT2G39800 // AT5G51600 // AT5G64530 // AT3G45640 // AT5G05950 // AT5G50820 // AT4G30090 // AT1G77690 // AT5G48010 // AT3G45970 // AT1G26770 // AT4G31820 // AT2G46870 // AT3G26744 // AT2G02820 // AT1G12610 // AT4G01540 // AT3G14362 // AT1G26820 // AT5G65…
GO:0009414	P	response to water deprivation	14	989	229	37767	0.0041	0.093	// AT1G20450 // AT2G35930 // AT3G50970 // AT1G32640 // AT5G25610 // AT1G01470 // AT4G18780 // AT4G25480 // AT4G27410 // AT2G39800 // AT4G02200 // AT4G25490 // AT5G59320 // AT2G05520
GO:0009653	P	anatomical structure morphogenesis	29	989	637	37767	0.0041	0.093	// AT3G49120 // AT2G28950 // AT1G12040 // AT5G18560 // AT4G28250 // AT5G51600 // AT3G45970 // AT1G26770 // AT1G75780 // AT1G76540 // AT2G02820 // AT5G65870 // AT2G06850 // AT3G62680 // AT2G22860 // AT1G12560 // AT4G01540 // AT4G38400 // AT3G62720 // AT3G50660 // AT2G28550 // AT5G16910 // AT5G54380 // AT1G77690 // AT3G15370 // AT4G17030 // AT3G45960 // AT3G18000 // AT1G14350
GO:0009739	P	response to gibberellin stimulus	11	989	159	37767	0.0044	0.099	// AT5G62470 // AT4G38620 // AT4G36410 // AT3G50060 // AT3G16350 // AT5G14920 // AT4G23060 // AT5G15230 // AT5G60890 // AT5G37770 // AT4G37260
GO:0016053	P	organic acid biosynthetic process	21	989	417	37767	0.0047	0.1	// AT5G38020 // AT1G05800 // AT1G11790 // AT5G42650 // AT5G60890 // AT2G06050 // AT4G18780 // AT3G03630 // AT3G25780 // AT2G15090 // AT2G39800 // AT3G03780 // AT2G36880 // AT3G17390 // AT5G17920 // AT1G20510 // AT1G17420 // AT1G51500 // AT5G57800 // AT2G29980 // AT1G72520
GO:0044272	P	sulfur compound biosynthetic process	9	989	115	37767	0.0046	0.1	// AT1G62540 // AT5G60890 // AT2G36880 // AT5G17920 // AT3G03630 // AT3G03780 // AT3G17390 // AT3G45640 // AT1G12140
GO:0046394	P	carboxylic acid biosynthetic process	21	989	417	37767	0.0047	0.1	// AT5G38020 // AT1G05800 // AT1G11790 // AT5G42650 // AT5G60890 // AT2G06050 // AT4G18780 // AT3G03630 // AT3G25780 // AT2G15090 // AT2G39800 // AT3G03780 // AT2G36880 // AT3G17390 // AT5G17920 // AT1G20510 // AT1G17420 // AT1G51500 // AT5G57800 // AT2G29980 // AT1G72520
GO:0016620	F	oxidoreductase activity, acting on the aldehyde or oxo group of donors, NAD or NADP as acceptor	6	989	56	37767	0.005	0.1	// AT1G58290 // AT4G30470 // AT4G36250 // AT1G12900 // AT2G39800 // AT5G14700
GO:0016835	F	carbon-oxygen lyase activity	11	989	163	37767	0.0053	0.1	// AT3G09540 // AT1G11790 // AT5G42650 // AT1G08080 // AT3G03630 // AT3G44320 // AT5G04310 // AT5G48900 // AT2G28210 // AT1G04680 // AT3G27400
GO:0034641	P	cellular nitrogen compound metabolic process	24	989	506	37767	0.0054	0.11	// AT1G58290 // AT5G26030 // AT3G61750 // AT4G14690 // AT2G39800 // AT3G03780 // AT3G17390 // AT3G45640 // AT1G69040 // AT5G60890 // AT4G08040 // AT5G17920 // AT1G55670 // AT1G74470 // AT2G36880 // AT4G13930 // AT3G57010 // AT1G11790 // AT2G20340 // AT3G03630 // AT4G37770 // AT3G18000 // AT4G34710 // AT3G07420
GO:0032989	P	cellular component morphogenesis	16	989	289	37767	0.0056	0.11	// AT4G17030 // AT3G45970 // AT3G49120 // AT1G75780 // AT1G12560 // AT2G28950 // AT4G38400 // AT1G12040 // AT3G45960 // AT3G50660 // AT3G18000 // AT2G06850 // AT5G54380 // AT4G28250 // AT1G26770 // AT3G15370
GO:0009699	P	phenylpropanoid biosynthetic process	10	989	141	37767	0.0056	0.11	// AT4G30470 // AT1G32640 // AT2G45400 // AT1G77520 // AT5G08640 // AT3G51240 // AT5G66220 // AT5G14700 // AT3G17390 // AT4G11190
GO:0006575	P	cellular amino acid derivative metabolic process	17	989	315	37767	0.0055	0.11	// AT4G30470 // AT3G17390 // AT1G32640 // AT5G60890 // AT2G36880 // AT2G45400 // AT1G77520 // AT5G08640 // AT3G18000 // AT4G08040 // AT3G51240 // AT4G37770 // AT5G66220 // AT5G14700 // AT4G34710 // AT1G20510 // AT4G11190
GO:0016788	F	hydrolase activity, acting on ester bonds	47	989	1200	37767	0.0055	0.11	// AT1G75880 // AT3G49330 // AT1G02810 // AT3G16370 // AT5G62350 // AT5G45280 // AT5G53370 // AT1G09390 // AT2G30020 // AT2G23610 // AT4G02330 // AT3G44260 // AT3G47380 // AT1G05800 // AT1G56670 // AT5G24780 // AT1G14890 // AT4G33220 // AT2G01880 // AT1G26820 // AT5G24770 // AT5G23870 // AT5G10100 // AT3G14220 // AT4G39770 // AT5G47500 // AT5G45670 // AT1G62770 // AT5G26670 // AT2G01610 // AT4G19…
GO:0005342	F	organic acid transmembrane transporter activity	7	989	78	37767	0.0061	0.11	// AT5G41800 // AT5G63850 // AT1G77690 // AT2G26900 // AT4G24570 // AT1G77380 // AT2G22500
GO:0046943	F	carboxylic acid transmembrane transporter activity	7	989	78	37767	0.0061	0.11	// AT5G41800 // AT5G63850 // AT1G77690 // AT2G26900 // AT4G24570 // AT1G77380 // AT2G22500
GO:0008168	F	methyltransferase activity	15	989	273	37767	0.0076	0.14	// AT5G54400 // AT1G76790 // AT3G23470 // AT3G44860 // AT4G13930 // AT5G38020 // AT3G15530 // AT1G77520 // AT3G44870 // AT4G30860 // AT1G69770 // AT3G03780 // AT5G17920 // AT5G37990 // AT3G18000
GO:0016741	F	transferase activity, transferring one-carbon groups	15	989	275	37767	0.0081	0.14	// AT5G54400 // AT1G76790 // AT3G23470 // AT3G44860 // AT4G13930 // AT5G38020 // AT3G15530 // AT1G77520 // AT3G44870 // AT4G30860 // AT1G69770 // AT3G03780 // AT5G17920 // AT5G37990 // AT3G18000
GO:0016143	P	S-glycoside metabolic process	6	989	62	37767	0.0078	0.15	// AT1G62540 // AT5G60890 // AT3G44320 // AT5G25980 // AT5G26000 // AT1G12140
GO:0019684	P	photosynthesis, light reaction	8	989	103	37767	0.0077	0.15	// AT5G66570 // AT4G04640 // AT4G03280 // AT3G61470 // AT4G12800 // AT2G46820 // AT1G55670 // AT1G60950
GO:0019757	P	glycosinolate metabolic process	6	989	62	37767	0.0078	0.15	// AT1G62540 // AT5G60890 // AT3G44320 // AT5G25980 // AT5G26000 // AT1G12140
GO:0019760	P	glucosinolate metabolic process	6	989	62	37767	0.0078	0.15	// AT1G62540 // AT5G60890 // AT3G44320 // AT5G25980 // AT5G26000 // AT1G12140
GO:0007049	P	cell cycle	15	989	275	37767	0.0081	0.16	// AT2G45080 // AT4G35620 // AT1G76540 // AT3G59550 // AT4G37630 // AT1G76310 // AT3G60550 // AT1G69770 // AT5G51600 // AT1G70210 // AT2G33560 // AT5G06150 // AT3G11520 // AT5G11300 // AT2G26760
GO:0009723	P	response to ethylene stimulus	12	989	199	37767	0.0084	0.16	// AT3G50060 // AT4G38620 // AT5G64900 // AT3G16350 // AT4G18780 // AT3G47600 // AT5G44030 // AT2G44840 // AT4G34990 // AT5G62470 // AT4G37260 // AT2G05520
GO:0009698	P	phenylpropanoid metabolic process	11	989	175	37767	0.0086	0.16	// AT4G30470 // AT1G32640 // AT2G45400 // AT1G77520 // AT5G08640 // AT3G51240 // AT5G66220 // AT5G14700 // AT3G17390 // AT1G20510 // AT4G11190
GO:0000096	P	sulfur amino acid metabolic process	7	989	84	37767	0.0088	0.16	// AT2G36880 // AT3G03630 // AT4G37770 // AT4G08040 // AT3G03780 // AT3G17390 // AT5G17920
GO:0050794	P	regulation of cellular process	111	989	3375	37767	0.0091	0.17	// AT5G49520 // AT3G50060 // AT5G06870 // AT3G24310 // AT4G14690 // AT5G15230 // AT2G34930 // AT5G46450 // AT1G80840 // AT2G20142 // AT5G43650 // AT1G76310 // AT1G69040 // AT4G18510 // AT1G05800 // AT3G26744 // AT2G19780 // AT4G25480 // AT1G19050 // AT1G74500 // AT3G07000 // AT1G19180 // AT1G70210 // AT4G37780 // AT5G23280 // AT5G11250 // AT5G21960 // AT3G03260 // AT5G54380 // AT4G25470 // AT1G21…
GO:0034637	P	cellular carbohydrate biosynthetic process	11	989	177	37767	0.0092	0.17	// AT3G62720 // AT1G62540 // AT5G60890 // AT4G18780 // AT5G44030 // AT3G43190 // AT4G17090 // AT5G10100 // AT1G12140 // AT4G39770 // AT5G17420
GO:0009521	C	photosystem	6	989	66	37767	0.01	0.19	// AT5G66570 // AT1G31330 // AT3G61470 // AT4G12800 // AT2G46820 // AT1G55670
GO:0000097	P	sulfur amino acid biosynthetic process	5	989	49	37767	0.012	0.22	// AT3G03780 // AT2G36880 // AT3G03630 // AT3G17390 // AT5G17920
GO:0019438	P	aromatic compound biosynthetic process	13	989	237	37767	0.013	0.22	// AT4G30470 // AT1G11790 // AT1G32640 // AT5G60890 // AT2G45400 // AT1G77520 // AT5G08640 // AT3G51240 // AT5G66220 // AT5G14700 // AT3G17390 // AT3G45640 // AT4G11190
GO:0009624	P	response to nematode	6	989	70	37767	0.013	0.23	// AT1G72140 // AT4G24260 // AT5G51600 // AT3G14310 // AT1G71880 // AT3G45680
GO:0009314	P	response to radiation	26	989	613	37767	0.014	0.25	// AT1G58290 // AT3G49120 // AT4G14690 // AT4G38620 // AT1G20340 // AT2G23050 // AT4G37590 // AT1G75780 // AT5G66570 // AT4G03280 // AT2G06850 // AT3G48100 // AT5G37770 // AT3G28860 // AT5G06150 // AT1G25450 // AT3G27690 // AT4G19230 // AT4G31820 // AT3G59220 // AT5G66560 // AT1G80730 // AT3G15540 // AT3G51240 // AT1G60950 // AT1G01470
GO:0007167	P	enzyme linked receptor protein signaling pathway	9	989	140	37767	0.015	0.25	// AT2G24130 // AT1G68400 // AT5G51560 // AT3G56100 // AT5G46330 // AT1G75640 // AT1G17750 // AT1G64210 // AT5G43020
GO:0007169	P	transmembrane receptor protein tyrosine kinase signaling pathway	9	989	140	37767	0.015	0.25	// AT2G24130 // AT1G68400 // AT5G51560 // AT3G56100 // AT5G46330 // AT1G75640 // AT1G17750 // AT1G64210 // AT5G43020
GO:0008610	P	lipid biosynthetic process	20	989	439	37767	0.015	0.26	// AT5G38020 // AT1G05800 // AT3G23470 // AT5G42650 // AT2G06050 // AT4G18780 // AT2G45400 // AT5G14700 // AT3G18000 // AT3G25780 // AT2G15090 // AT3G50660 // AT2G29980 // AT1G20510 // AT3G53130 // AT1G51500 // AT5G57800 // AT1G17420 // AT1G72520 // AT5G48010
GO:0003700	F	transcription factor activity	74	989	2173	37767	0.015	0.26	// AT5G49520 // AT3G50060 // AT4G38620 // AT3G24310 // AT5G65310 // AT1G63030 // AT1G32640 // AT3G16350 // AT3G24520 // AT3G26744 // AT5G18560 // AT5G28300 // AT4G16750 // AT2G44840 // AT2G23290 // AT5G64530 // AT4G17460 // AT1G80840 // AT2G22760 // AT3G22830 // AT5G43650 // AT5G52010 // AT4G39070 // AT1G44830 // AT2G28550 // AT4G32800 // AT3G54810 // AT2G02820 // AT5G51990 // AT1G12610 // AT4G01…
GO:0008194	F	UDP-glycosyltransferase activity	12	989	219	37767	0.016	0.27	// AT1G12990 // AT4G02130 // AT1G70090 // AT3G50760 // AT3G62720 // AT3G43190 // AT1G07260 // AT3G21560 // AT3G15350 // AT1G24170 // AT3G27540 // AT1G67880
GO:0009617	P	response to bacterium	13	989	247	37767	0.017	0.28	// AT3G49120 // AT1G80840 // AT4G31800 // AT4G12720 // AT4G18780 // AT5G46330 // AT5G44030 // AT4G19690 // AT5G45110 // AT5G01600 // AT3G45640 // AT4G23670 // AT1G19180
GO:0016740	F	transferase activity	107	989	3321	37767	0.017	0.28	// AT5G07010 // AT2G41890 // AT4G03210 // AT4G30860 // AT4G01950 // AT3G56000 // AT3G59350 // AT1G76790 // AT3G15530 // AT5G38280 // AT5G17920 // AT3G01840 // AT1G78940 // AT1G25450 // AT3G50760 // AT5G43780 // AT5G54380 // AT2G43690 // AT3G28180 // AT5G54400 // AT1G07260 // AT3G18000 // AT1G70130 // AT1G75880 // AT2G24850 // AT4G02130 // AT3G21560 // AT3G60550 // AT3G63110 // AT5G03640 // AT1G76…
GO:0009416	P	response to light stimulus	25	989	596	37767	0.018	0.3	// AT1G58290 // AT3G49120 // AT4G14690 // AT3G28860 // AT1G20340 // AT2G23050 // AT4G37590 // AT1G75780 // AT5G66570 // AT4G38620 // AT4G03280 // AT2G06850 // AT3G48100 // AT5G37770 // AT1G25450 // AT3G27690 // AT4G19230 // AT4G31820 // AT3G59220 // AT5G66560 // AT1G80730 // AT3G15540 // AT3G51240 // AT1G60950 // AT1G01470
GO:0016705	F	oxidoreductase activity, acting on paired donors, with incorporation or reduction of molecular oxygen	11	989	198	37767	0.019	0.3	// AT3G12900 // AT3G61580 // AT3G61750 // AT1G62540 // AT1G01600 // AT2G34490 // AT5G08640 // AT3G51240 // AT2G29980 // AT4G19230 // AT1G12140
GO:0008092	F	cytoskeletal protein binding	7	989	100	37767	0.02	0.31	// AT3G05470 // AT1G20450 // AT5G48460 // AT1G68060 // AT2G29890 // AT5G51600 // AT5G27000
GO:0006555	P	methionine metabolic process	5	989	56	37767	0.02	0.32	// AT4G08040 // AT3G03780 // AT4G37770 // AT3G17390 // AT5G17920
GO:0003777	F	microtubule motor activity	6	989	78	37767	0.021	0.32	// AT1G18370 // AT2G28620 // AT2G47500 // AT2G22610 // AT3G50240 // AT5G27000
GO:0016563	F	transcription activator activity	10	989	177	37767	0.022	0.34	// AT3G26744 // AT1G32640 // AT5G60890 // AT4G01540 // AT4G25480 // AT4G27410 // AT5G65310 // AT5G51990 // AT4G25470 // AT4G25490
GO:0016138	P	glycoside biosynthetic process	6	989	79	37767	0.022	0.35	// AT1G62540 // AT5G60890 // AT3G43190 // AT5G10100 // AT1G12140 // AT4G39770
GO:0042742	P	defense response to bacterium	10	989	177	37767	0.022	0.36	// AT3G49120 // AT1G80840 // AT4G31800 // AT4G12720 // AT4G18780 // AT5G46330 // AT5G44030 // AT5G45110 // AT4G23670 // AT1G19180
GO:0044264	P	cellular polysaccharide metabolic process	8	989	127	37767	0.023	0.37	// AT3G62720 // AT4G18780 // AT5G44030 // AT1G11545 // AT4G37800 // AT4G17090 // AT3G18660 // AT5G17420
GO:0046686	P	response to cadmium ion	10	989	178	37767	0.023	0.37	// AT1G13930 // AT3G50060 // AT4G38620 // AT5G62470 // AT3G16350 // AT3G47600 // AT4G34990 // AT2G23290 // AT4G23670 // AT4G37260
GO:0048513	P	organ development	32	989	838	37767	0.026	0.41	// AT3G50060 // AT3G28860 // AT1G63030 // AT5G53290 // AT1G12040 // AT5G18560 // AT2G39800 // AT5G64530 // AT3G45640 // AT5G48010 // AT2G28550 // AT2G46870 // AT2G02820 // AT1G12610 // AT3G14362 // AT5G65870 // AT4G31820 // AT3G62680 // AT2G22860 // AT4G28190 // AT3G61590 // AT4G01540 // AT3G62720 // AT3G50660 // AT5G16910 // AT1G76540 // AT1G77690 // AT3G56090 // AT5G47990 // AT1G14350 // AT5G01…
GO:0048731	P	system development	32	989	839	37767	0.027	0.41	// AT3G50060 // AT3G28860 // AT1G63030 // AT5G53290 // AT1G12040 // AT5G18560 // AT2G39800 // AT5G64530 // AT3G45640 // AT5G48010 // AT2G28550 // AT2G46870 // AT2G02820 // AT1G12610 // AT3G14362 // AT5G65870 // AT4G31820 // AT3G62680 // AT2G22860 // AT4G28190 // AT3G61590 // AT4G01540 // AT3G62720 // AT3G50660 // AT5G16910 // AT1G76540 // AT1G77690 // AT3G56090 // AT5G47990 // AT1G14350 // AT5G01…
GO:0050789	P	regulation of biological process	116	989	3697	37767	0.027	0.41	// AT5G49520 // AT3G50060 // AT5G06870 // AT3G24310 // AT4G14690 // AT5G15230 // AT2G34930 // AT5G46450 // AT1G80840 // AT2G20142 // AT5G43650 // AT1G76310 // AT1G69040 // AT4G18510 // AT1G05800 // AT3G26744 // AT2G19780 // AT4G25480 // AT1G19050 // AT1G74500 // AT3G07000 // AT1G19180 // AT1G70210 // AT4G37780 // AT5G23280 // AT5G11250 // AT5G21960 // AT3G03260 // AT5G54380 // AT4G31820 // AT4G25…
GO:0006519	P	cellular amino acid and derivative metabolic process	27	989	682	37767	0.027	0.41	// AT3G61750 // AT1G32640 // AT2G45400 // AT4G37770 // AT2G39800 // AT5G66220 // AT3G17390 // AT1G69040 // AT5G60890 // AT5G14700 // AT4G08040 // AT5G17920 // AT2G36880 // AT4G13930 // AT5G08640 // AT1G20510 // AT4G11190 // AT4G30470 // AT1G11790 // AT2G20340 // AT3G03630 // AT1G77520 // AT3G18000 // AT3G51240 // AT4G34710 // AT3G03780 // AT3G07420
GO:0016903	F	oxidoreductase activity, acting on the aldehyde or oxo group of donors	6	989	84	37767	0.028	0.41	// AT1G58290 // AT4G30470 // AT4G36250 // AT1G12900 // AT2G39800 // AT5G14700
GO:0008757	F	S-adenosylmethionine-dependent methyltransferase activity	7	989	109	37767	0.029	0.43	// AT3G44860 // AT5G38020 // AT3G23470 // AT3G18000 // AT1G69770 // AT5G37990 // AT3G44870
GO:0010287	C	plastoglobule	6	989	81	37767	0.024	0.43	// AT5G66570 // AT5G42650 // AT1G31330 // AT3G23400 // AT1G61520 // AT4G12800
GO:0005215	F	transporter activity	51	989	1477	37767	0.032	0.45	// AT3G28860 // AT1G33440 // AT5G41800 // AT3G51600 // AT4G24570 // AT5G63850 // AT4G19690 // AT2G37925 // AT3G23400 // AT1G16370 // AT1G61890 // AT5G45105 // AT4G05120 // AT3G45680 // AT4G33020 // AT4G21680 // AT1G77380 // AT1G27770 // AT3G10290 // AT5G52000 // AT1G19770 // AT2G38060 // AT1G71880 // AT2G16850 // AT4G29140 // AT4G27730 // AT4G13420 // AT2G24610 // AT1G72140 // AT5G17700 // AT1G11…
GO:0030246	F	carbohydrate binding	9	989	162	37767	0.032	0.45	// AT2G41890 // AT5G18470 // AT3G01260 // AT1G53070 // AT2G43620 // AT3G15356 // AT1G18650 // AT1G65390 // AT1G78830
GO:0022900	P	electron transport chain	6	989	88	37767	0.033	0.5	// AT5G66570 // AT4G04640 // AT4G03280 // AT2G46820 // AT1G55670 // AT1G60950
GO:0055066	P	di-, tri-valent inorganic cation homeostasis	5	989	65	37767	0.033	0.5	// AT3G56090 // AT2G39450 // AT1G20340 // AT4G19690 // AT5G01600
GO:0043436	P	oxoacid metabolic process	32	989	859	37767	0.035	0.52	// AT5G07010 // AT3G61750 // AT4G19230 // AT2G39800 // AT3G03780 // AT3G17390 // AT1G17420 // AT1G69040 // AT1G05800 // AT5G42650 // AT1G01600 // AT2G06050 // AT4G08040 // AT2G29980 // AT1G25450 // AT2G36880 // AT5G17920 // AT4G13930 // AT1G20510 // AT3G25780 // AT5G38020 // AT1G11790 // AT2G20340 // AT4G18780 // AT3G03630 // AT4G37770 // AT2G15090 // AT5G60890 // AT1G51500 // AT5G57800 // AT3G07…
GO:0019752	P	carboxylic acid metabolic process	32	989	859	37767	0.035	0.52	// AT5G07010 // AT3G61750 // AT4G19230 // AT2G39800 // AT3G03780 // AT3G17390 // AT1G17420 // AT1G69040 // AT1G05800 // AT5G42650 // AT1G01600 // AT2G06050 // AT4G08040 // AT2G29980 // AT1G25450 // AT2G36880 // AT5G17920 // AT4G13930 // AT1G20510 // AT3G25780 // AT5G38020 // AT1G11790 // AT2G20340 // AT4G18780 // AT3G03630 // AT4G37770 // AT2G15090 // AT5G60890 // AT1G51500 // AT5G57800 // AT3G07…
GO:0006082	P	organic acid metabolic process	32	989	860	37767	0.035	0.52	// AT5G07010 // AT3G61750 // AT4G19230 // AT2G39800 // AT3G03780 // AT3G17390 // AT1G17420 // AT1G69040 // AT1G05800 // AT5G42650 // AT1G01600 // AT2G06050 // AT4G08040 // AT2G29980 // AT1G25450 // AT2G36880 // AT5G17920 // AT4G13930 // AT1G20510 // AT3G25780 // AT5G38020 // AT1G11790 // AT2G20340 // AT4G18780 // AT3G03630 // AT4G37770 // AT2G15090 // AT5G60890 // AT1G51500 // AT5G57800 // AT3G07…
GO:0030528	F	transcription regulator activity	78	989	2417	37767	0.038	0.52	// AT5G49520 // AT3G50060 // AT4G38620 // AT3G24310 // AT5G65310 // AT1G63030 // AT1G32640 // AT3G16350 // AT3G24520 // AT1G33760 // AT5G18560 // AT5G28300 // AT4G16750 // AT2G44840 // AT2G23290 // AT5G64530 // AT4G17460 // AT1G80840 // AT2G22760 // AT3G22830 // AT5G43650 // AT5G52010 // AT4G39070 // AT1G44830 // AT2G28550 // AT4G32800 // AT3G54810 // AT2G02820 // AT5G51990 // AT1G12610 // AT4G01…
GO:0048528	P	post-embryonic root development	5	989	67	37767	0.037	0.54	// AT3G50060 // AT3G28860 // AT1G77690 // AT5G18560 // AT3G18000
GO:0031323	P	regulation of cellular metabolic process	67	989	2036	37767	0.037	0.54	// AT5G49520 // AT3G50060 // AT4G38620 // AT3G24310 // AT4G14690 // AT1G32640 // AT3G16350 // AT3G45640 // AT3G26744 // AT5G18560 // AT1G20340 // AT2G44840 // AT2G23290 // AT4G17460 // AT1G80840 // AT2G22760 // AT5G43650 // AT5G52010 // AT5G65310 // AT4G39070 // AT1G69040 // AT3G55980 // AT2G28550 // AT4G32800 // AT1G62975 // AT2G02820 // AT5G51990 // AT1G28310 // AT4G34410 // AT4G25480 // AT1G33…
GO:0034357	C	photosynthetic membrane	13	989	273	37767	0.033	0.56	// AT1G55670 // AT4G04640 // AT5G66570 // AT4G12800 // AT1G31330 // AT3G15520 // AT4G03280 // AT3G18890 // AT3G23400 // AT3G61470 // AT1G74470 // AT2G46820 // AT3G49720
GO:0006725	P	cellular aromatic compound metabolic process	17	989	399	37767	0.04	0.57	// AT4G30470 // AT1G11790 // AT1G32640 // AT5G60890 // AT2G36880 // AT3G45640 // AT2G45400 // AT1G77520 // AT5G08640 // AT3G51240 // AT5G66220 // AT5G14700 // AT3G17390 // AT3G63110 // AT1G20510 // AT4G11190 // AT5G21482
GO:0009813	P	flavonoid biosynthetic process	5	989	69	37767	0.041	0.58	// AT2G45400 // AT3G51240 // AT5G66220 // AT5G08640 // AT1G32640
GO:0022622	P	root system development	12	989	255	37767	0.043	0.58	// AT3G50060 // AT3G28860 // AT1G12040 // AT5G47990 // AT5G18560 // AT1G77690 // AT2G39800 // AT3G62680 // AT5G16910 // AT5G63770 // AT3G62720 // AT5G48010
GO:0009889	P	regulation of biosynthetic process	62	989	1881	37767	0.043	0.58	// AT5G49520 // AT3G50060 // AT4G38620 // AT3G24310 // AT4G14690 // AT1G32640 // AT3G16350 // AT3G26744 // AT5G18560 // AT1G20340 // AT2G44840 // AT2G23290 // AT4G17460 // AT1G80840 // AT2G22760 // AT5G43650 // AT5G52010 // AT5G65310 // AT4G39070 // AT1G44830 // AT2G28550 // AT4G32800 // AT1G62975 // AT2G02820 // AT5G51990 // AT1G28310 // AT4G34410 // AT4G25480 // AT1G33760 // AT1G18400 // AT1G74…
GO:0042546	P	cell wall biogenesis	5	989	70	37767	0.043	0.58	// AT3G44990 // AT4G18780 // AT5G44030 // AT5G17420 // AT5G16910
GO:0048364	P	root development	12	989	255	37767	0.043	0.58	// AT3G50060 // AT3G28860 // AT1G12040 // AT5G47990 // AT5G18560 // AT1G77690 // AT2G39800 // AT3G62680 // AT5G16910 // AT5G63770 // AT3G62720 // AT5G48010
GO:0031326	P	regulation of cellular biosynthetic process	62	989	1881	37767	0.043	0.58	// AT5G49520 // AT3G50060 // AT4G38620 // AT3G24310 // AT4G14690 // AT1G32640 // AT3G16350 // AT3G26744 // AT5G18560 // AT1G20340 // AT2G44840 // AT2G23290 // AT4G17460 // AT1G80840 // AT2G22760 // AT5G43650 // AT5G52010 // AT5G65310 // AT4G39070 // AT1G44830 // AT2G28550 // AT4G32800 // AT1G62975 // AT2G02820 // AT5G51990 // AT1G28310 // AT4G34410 // AT4G25480 // AT1G33760 // AT1G18400 // AT1G74…
GO:0005529	F	sugar binding	5	989	70	37767	0.043	0.58	// AT1G53070 // AT1G78830 // AT2G41890 // AT5G18470 // AT3G15356
GO:0051234	P	establishment of localization	61	989	1851	37767	0.044	0.6	// AT2G38530 // AT3G22120 // AT3G28860 // AT1G33440 // AT5G41800 // AT3G51600 // AT4G24570 // AT5G63850 // AT4G19690 // AT2G37925 // AT3G23400 // AT1G61890 // AT5G45105 // AT3G45680 // AT5G01870 // AT4G21680 // AT1G27950 // AT1G77380 // AT3G54820 // AT5G50740 // AT1G75100 // AT5G52000 // AT1G19770 // AT1G77690 // AT2G44300 // AT1G12090 // AT2G16850 // AT5G59730 // AT4G29140 // AT3G53980 // AT5G01…
GO:0042180	P	cellular ketone metabolic process	32	989	882	37767	0.046	0.62	// AT5G07010 // AT3G61750 // AT4G19230 // AT2G39800 // AT3G03780 // AT3G17390 // AT1G17420 // AT1G69040 // AT1G05800 // AT5G42650 // AT1G01600 // AT2G06050 // AT4G08040 // AT2G29980 // AT1G25450 // AT2G36880 // AT5G17920 // AT4G13930 // AT1G20510 // AT3G25780 // AT5G38020 // AT1G11790 // AT2G20340 // AT4G18780 // AT3G03630 // AT4G37770 // AT2G15090 // AT5G60890 // AT1G51500 // AT5G57800 // AT3G07…
GO:0032787	P	monocarboxylic acid metabolic process	17	989	408	37767	0.047	0.63	// AT3G25780 // AT5G38020 // AT5G07010 // AT1G05800 // AT1G25450 // AT5G42650 // AT1G01600 // AT2G06050 // AT4G18780 // AT4G19230 // AT2G15090 // AT2G29980 // AT1G20510 // AT1G17420 // AT1G51500 // AT5G57800 // AT1G72520
GO:0006810	P	transport	60	989	1846	37767	0.056	0.74	// AT2G38530 // AT3G22120 // AT3G28860 // AT1G33440 // AT5G41800 // AT3G51600 // AT4G24570 // AT5G63850 // AT4G19690 // AT2G37925 // AT3G23400 // AT1G61890 // AT5G45105 // AT3G45680 // AT5G01870 // AT4G21680 // AT1G77380 // AT3G54820 // AT5G50740 // AT1G27950 // AT5G52000 // AT1G19770 // AT1G77690 // AT2G44300 // AT1G12090 // AT2G16850 // AT5G59730 // AT4G29140 // AT3G53980 // AT5G01600 // AT4G27…
GO:0009579	C	thylakoid	16	989	376	37767	0.046	0.74	// AT1G55670 // AT4G04640 // AT5G66570 // AT4G12800 // AT2G22170 // AT3G47860 // AT1G31330 // AT3G15520 // AT1G20340 // AT4G03280 // AT3G18890 // AT3G23400 // AT3G61470 // AT1G74470 // AT2G46820 // AT3G49720
GO:0080090	P	regulation of primary metabolic process	63	989	1952	37767	0.057	0.75	// AT5G49520 // AT3G50060 // AT4G38620 // AT3G24310 // AT5G65310 // AT1G32640 // AT3G16350 // AT3G26744 // AT5G18560 // AT1G20340 // AT2G44840 // AT2G23290 // AT4G17460 // AT1G80840 // AT2G22760 // AT5G43650 // AT5G52010 // AT4G39070 // AT1G69040 // AT3G55980 // AT2G28550 // AT4G32800 // AT1G62975 // AT2G02820 // AT5G51990 // AT1G28310 // AT4G34410 // AT4G25480 // AT1G33760 // AT1G18400 // AT1G74…
GO:0003774	F	motor activity	6	989	101	37767	0.057	0.75	// AT1G18370 // AT2G28620 // AT2G47500 // AT2G22610 // AT3G50240 // AT5G27000
GO:0016052	P	carbohydrate catabolic process	7	989	128	37767	0.058	0.76	// AT3G44320 // AT1G12900 // AT5G25980 // AT4G17090 // AT5G26000 // AT1G68560 // AT5G64570
GO:0051179	P	localization	62	989	1922	37767	0.059	0.76	// AT2G38530 // AT3G22120 // AT3G28860 // AT1G33440 // AT5G41800 // AT3G51600 // AT4G24570 // AT5G46330 // AT4G19690 // AT2G37925 // AT3G23400 // AT1G61890 // AT5G45105 // AT3G45680 // AT5G01870 // AT4G21680 // AT1G27950 // AT1G77380 // AT3G54820 // AT5G50740 // AT1G75100 // AT5G52000 // AT1G19770 // AT1G77690 // AT2G44300 // AT1G12090 // AT2G16850 // AT5G59730 // AT4G29140 // AT3G53980 // AT5G01…
GO:0009733	P	response to auxin stimulus	15	989	360	37767	0.06	0.76	// AT3G12830 // AT5G62470 // AT4G38620 // AT2G14960 // AT3G16350 // AT4G37260 // AT3G15540 // AT3G47600 // AT2G06850 // AT5G37770 // AT3G28860 // AT5G57560 // AT1G77690 // AT1G17345 // AT4G34760
GO:0004650	F	polygalacturonase activity	5	989	77	37767	0.059	0.76	// AT4G23820 // AT1G70370 // AT3G15720 // AT3G06770 // AT2G43870
GO:0009812	P	flavonoid metabolic process	5	989	78	37767	0.061	0.78	// AT2G45400 // AT3G51240 // AT5G66220 // AT5G08640 // AT1G32640
GO:0044271	P	cellular nitrogen compound biosynthetic process	16	989	394	37767	0.063	0.8	// AT1G58290 // AT5G26030 // AT3G17390 // AT1G11790 // AT5G60890 // AT2G36880 // AT3G45640 // AT3G03630 // AT4G34710 // AT3G18000 // AT2G39800 // AT3G03780 // AT1G74470 // AT5G17920 // AT3G57010 // AT4G14690
GO:0009308	P	amine metabolic process	20	989	521	37767	0.065	0.82	// AT1G69040 // AT3G61750 // AT3G17390 // AT1G11790 // AT3G03630 // AT2G20340 // AT3G63110 // AT1G31710 // AT4G37770 // AT3G18000 // AT4G08040 // AT2G39800 // AT3G03780 // AT4G34710 // AT5G17920 // AT2G36880 // AT5G21482 // AT4G13930 // AT3G07420 // AT5G60890
GO:0015849	P	organic acid transport	5	989	81	37767	0.069	0.85	// AT1G17840 // AT1G77690 // AT5G63850 // AT1G77380 // AT5G41800
GO:0046942	P	carboxylic acid transport	5	989	81	37767	0.069	0.85	// AT1G17840 // AT1G77690 // AT5G63850 // AT1G77380 // AT5G41800
GO:0045449	P	regulation of transcription	58	989	1802	37767	0.068	0.85	// AT5G49520 // AT3G50060 // AT4G38620 // AT3G24310 // AT5G65310 // AT1G32640 // AT3G16350 // AT3G26744 // AT5G18560 // AT2G44840 // AT2G23290 // AT4G17460 // AT1G80840 // AT2G22760 // AT5G43650 // AT5G52010 // AT4G39070 // AT1G44830 // AT2G28550 // AT4G32800 // AT1G62975 // AT2G02820 // AT5G51990 // AT1G28310 // AT4G34410 // AT4G25480 // AT1G33760 // AT1G18400 // AT1G74500 // AT5G62470 // AT4G37…
GO:0010556	P	regulation of macromolecule biosynthetic process	59	989	1843	37767	0.072	0.88	// AT5G49520 // AT3G50060 // AT4G38620 // AT3G24310 // AT5G65310 // AT1G32640 // AT3G16350 // AT3G26744 // AT5G18560 // AT1G20340 // AT2G44840 // AT2G23290 // AT4G17460 // AT1G80840 // AT2G22760 // AT5G43650 // AT5G52010 // AT4G39070 // AT1G44830 // AT2G28550 // AT4G32800 // AT1G62975 // AT2G02820 // AT5G51990 // AT1G28310 // AT4G34410 // AT4G25480 // AT1G33760 // AT1G18400 // AT1G74500 // AT5G62…
GO:0005275	F	amine transmembrane transporter activity	5	989	81	37767	0.069	0.88	// AT1G77690 // AT3G16240 // AT5G63850 // AT1G77380 // AT5G41800
GO:0009411	P	response to UV	5	989	83	37767	0.075	0.9	// AT4G38620 // AT3G51240 // AT4G14690 // AT3G28860 // AT1G20340
GO:0080134	P	regulation of response to stress	5	989	83	37767	0.075	0.9	// AT3G45640 // AT1G80840 // AT3G61190 // AT4G31800 // AT4G12720
GO:0044106	P	cellular amine metabolic process	17	989	438	37767	0.078	0.92	// AT1G69040 // AT3G61750 // AT4G34710 // AT1G11790 // AT5G60890 // AT2G20340 // AT3G03630 // AT4G37770 // AT3G18000 // AT4G08040 // AT2G39800 // AT3G03780 // AT3G17390 // AT5G17920 // AT2G36880 // AT4G13930 // AT3G07420
GO:0051171	P	regulation of nitrogen compound metabolic process	60	989	1888	37767	0.077	0.92	// AT5G49520 // AT3G50060 // AT4G38620 // AT3G24310 // AT4G14690 // AT1G32640 // AT3G16350 // AT3G26744 // AT5G18560 // AT2G44840 // AT2G23290 // AT4G17460 // AT1G80840 // AT2G22760 // AT5G43650 // AT5G52010 // AT5G65310 // AT4G39070 // AT1G69040 // AT2G28550 // AT4G32800 // AT1G62975 // AT2G02820 // AT5G51990 // AT1G28310 // AT4G34410 // AT4G25480 // AT1G33760 // AT1G18400 // AT1G74500 // AT5G62…
GO:0022892	F	substrate-specific transporter activity	36	989	1059	37767	0.075	0.94	// AT3G28860 // AT5G41800 // AT3G51600 // AT5G63850 // AT4G19690 // AT2G37925 // AT1G16370 // AT5G45105 // AT4G33020 // AT1G77380 // AT4G05120 // AT1G27770 // AT3G10290 // AT5G52000 // AT1G19770 // AT2G38060 // AT1G71880 // AT2G16850 // AT4G27730 // AT3G16240 // AT4G13420 // AT2G24610 // AT1G77690 // AT1G12500 // AT4G24570 // AT5G05820 // AT4G19030 // AT3G45060 // AT1G65730 // AT2G39450 // AT1G17…
GO:0022857	F	transmembrane transporter activity	38	989	1128	37767	0.076	0.94	// AT3G28860 // AT5G41800 // AT4G24570 // AT5G63850 // AT4G19690 // AT2G37925 // AT1G16370 // AT1G61890 // AT5G45105 // AT4G33020 // AT4G05120 // AT1G27770 // AT3G10290 // AT1G77380 // AT1G19770 // AT2G38060 // AT1G71880 // AT2G16850 // AT4G29140 // AT4G13420 // AT2G24610 // AT5G17700 // AT1G11670 // AT1G12500 // AT3G28345 // AT2G27810 // AT5G05820 // AT1G77690 // AT4G19030 // AT3G45060 // AT3G16…
GO:0000302	P	response to reactive oxygen species	5	989	85	37767	0.081	0.95	// AT3G56090 // AT5G37770 // AT4G25100 // AT1G07890 // AT5G01600
GO:0009507	C	chloroplast	85	989	2740	37767	0.065	0.95	// AT1G58290 // AT5G26030 // AT3G54400 // AT4G12800 // AT1G76240 // AT1G31330 // AT4G04640 // AT5G15190 // AT1G66090 // AT3G23400 // AT1G09390 // AT2G30020 // AT3G44610 // AT1G20310 // AT3G53130 // AT5G01110 // AT4G20210 // AT4G08390 // AT4G27520 // AT1G44830 // AT1G05800 // AT5G66570 // AT4G28290 // AT5G42650 // AT1G27770 // AT5G11250 // AT1G55205 // AT4G03280 // AT1G24330 // AT5G48910 // AT1G49…
GO:0044434	C	chloroplast part	27	989	746	37767	0.064	0.95	// AT1G31330 // AT4G04640 // AT3G23400 // AT1G09390 // AT4G12800 // AT4G08390 // AT5G66570 // AT5G42650 // AT1G27770 // AT4G03280 // AT1G66430 // AT1G55670 // AT2G26900 // AT2G46820 // AT3G18890 // AT4G17090 // AT3G49720 // AT1G04420 // AT1G13930 // AT5G16010 // AT3G25660 // AT1G20340 // AT1G61520 // AT5G02940 // AT1G74470 // AT3G15520 // AT1G60950
GO:0009536	C	plastid	91	989	2965	37767	0.07	0.98	// AT1G58290 // AT5G20260 // AT3G02930 // AT1G05800 // AT1G20310 // AT2G38060 // AT1G49840 // AT3G53900 // AT5G11250 // AT5G11650 // AT5G43780 // AT5G05350 // AT3G18890 // AT1G04420 // AT1G21910 // AT1G76220 // AT1G24330 // AT2G17080 // AT3G56090 // AT1G20340 // AT4G20210 // AT4G35985 // AT1G72520 // AT5G26030 // AT2G30020 // AT1G31330 // AT4G04640 // AT5G15190 // AT5G15760 // AT5G02940 // AT3G63…
GO:0022621	P	shoot system development	12	989	358	37767	0.24	1	// AT5G53290 // AT2G46870 // AT2G02820 // AT3G56090 // AT4G01540 // AT3G14362 // AT3G50660 // AT1G14350 // AT5G01600 // AT5G64530 // AT4G31820 // AT5G63770
GO:0019222	P	regulation of metabolic process	67	989	2210	37767	0.13	1	// AT5G49520 // AT3G50060 // AT4G38620 // AT3G24310 // AT4G14690 // AT1G32640 // AT3G16350 // AT3G45640 // AT3G26744 // AT5G18560 // AT1G20340 // AT2G44840 // AT2G23290 // AT4G17460 // AT1G80840 // AT2G22760 // AT5G43650 // AT5G52010 // AT5G65310 // AT4G39070 // AT1G69040 // AT3G55980 // AT2G28550 // AT4G32800 // AT1G62975 // AT2G02820 // AT5G51990 // AT1G28310 // AT4G34410 // AT4G25480 // AT1G33…
GO:0048468	P	cell development	5	989	197	37767	0.59	1	// AT5G16910 // AT1G12040 // AT1G19050 // AT3G62720 // AT4G35350
GO:0034645	P	cellular macromolecule biosynthetic process	78	989	3661	37767	0.98	1	// AT5G49520 // AT3G50060 // AT4G38620 // AT3G25660 // AT3G24310 // AT5G65310 // AT1G32640 // AT3G16350 // AT5G44030 // AT5G18560 // AT5G15760 // AT2G27535 // AT2G44840 // AT5G17420 // AT2G23290 // AT4G17460 // AT1G80840 // AT2G22760 // AT5G43650 // AT5G52010 // AT1G12990 // AT4G39070 // AT1G76720 // AT2G28550 // AT4G32800 // AT1G62975 // AT2G02820 // AT5G51990 // AT1G28310 // AT1G20340 // AT4G34…
GO:0007165	P	signal transduction	36	989	1228	37767	0.27	1	// AT5G15230 // AT5G06870 // AT2G26380 // AT5G65310 // AT1G32640 // AT2G34930 // AT4G20940 // AT5G54030 // AT5G44030 // AT1G66090 // AT2G44840 // AT5G46450 // AT4G01540 // AT3G45640 // AT2G20142 // AT4G18510 // AT1G76540 // AT2G19780 // AT4G12720 // AT1G71400 // AT3G48100 // AT5G37770 // AT1G19050 // AT3G07000 // AT1G19180 // AT1G61840 // AT2G46710 // AT5G11250 // AT4G33270 // AT5G54380 // AT5G22…
GO:0032774	P	RNA biosynthetic process	33	989	1040	37767	0.16	1	// AT5G49520 // AT3G50060 // AT1G80840 // AT5G65310 // AT1G32640 // AT5G18560 // AT2G44840 // AT2G23290 // AT4G17460 // AT3G24310 // AT5G51990 // AT1G44830 // AT2G28550 // AT4G32800 // AT2G02820 // AT4G34410 // AT4G25480 // AT1G33760 // AT4G37780 // AT5G53290 // AT5G21960 // AT1G69770 // AT4G25470 // AT1G21910 // AT3G03260 // AT1G77640 // AT4G31800 // AT1G64860 // AT4G16141 // AT2G22850 // AT1G14…
GO:0009755	P	hormone-mediated signaling pathway	12	989	321	37767	0.15	1	// AT5G15230 // AT1G76540 // AT5G65310 // AT4G01540 // AT3G48100 // AT4G18780 // AT5G44030 // AT2G44840 // AT1G19050 // AT5G54380 // AT3G45640 // AT5G62920
GO:0051716	P	cellular response to stimulus	22	989	840	37767	0.53	1	// AT5G15230 // AT1G66270 // AT5G65310 // AT1G32640 // AT3G44320 // AT5G46330 // AT5G44030 // AT2G44840 // AT3G45640 // AT1G76540 // AT5G60890 // AT4G12720 // AT3G12710 // AT3G48100 // AT1G19050 // AT1G19180 // AT4G01540 // AT5G54380 // AT4G25100 // AT1G68760 // AT4G18780 // AT5G62920
GO:0000003	P	reproduction	34	989	1186	37767	0.32	1	// AT3G28860 // AT2G41890 // AT1G75880 // AT2G34790 // AT5G18560 // AT4G00310 // AT3G45640 // AT5G05950 // AT4G30090 // AT4G37590 // AT2G28550 // AT2G46870 // AT4G00080 // AT5G37770 // AT5G01040 // AT1G71880 // AT1G19180 // AT4G28190 // AT5G53290 // AT1G25450 // AT1G75520 // AT1G69770 // AT4G19230 // AT4G31820 // AT2G16500 // AT1G07890 // AT3G56090 // AT5G01370 // AT5G01600 // AT4G34710 // AT2G22…
GO:0000160	P	two-component signal transduction system (phosphorelay)	5	989	92	37767	0.1	1	// AT2G44840 // AT5G62920 // AT4G18780 // AT1G19050 // AT5G44030
GO:0070647	P	protein modification by small protein conjugation or removal	5	989	158	37767	0.4	1	// AT1G23410 // AT1G10560 // AT2G35930 // AT1G24330 // AT5G65920
GO:0055085	P	transmembrane transport	5	989	244	37767	0.76	1	// AT1G11670 // AT4G04640 // AT4G29140 // AT1G61890 // AT5G17700
GO:0032446	P	protein modification by small protein conjugation	5	989	136	37767	0.29	1	// AT1G23410 // AT1G10560 // AT2G35930 // AT1G24330 // AT5G65920
GO:0016310	P	phosphorylation	32	989	1079	37767	0.27	1	// AT2G41890 // AT3G56100 // AT3G44610 // AT5G46330 // AT2G43690 // AT1G51940 // AT3G45640 // AT2G05940 // AT3G59350 // AT5G03640 // AT2G24130 // AT1G76540 // AT1G75640 // AT3G01840 // AT1G78940 // AT5G43020 // AT5G25930 // AT2G42960 // AT4G04640 // AT1G17750 // AT5G24010 // AT5G54380 // AT1G76360 // AT5G40540 // AT1G64210 // AT1G68400 // AT5G48740 // AT5G51560 // AT5G40030 // AT1G56720 // AT1G70…
GO:0048518	P	positive regulation of biological process	6	989	259	37767	0.67	1	// AT4G18780 // AT5G65310 // AT4G12720 // AT1G32640 // AT4G31820 // AT3G26744
GO:0048519	P	negative regulation of biological process	9	989	442	37767	0.82	1	// AT4G38620 // AT1G05800 // AT5G66570 // AT2G29890 // AT1G20340 // AT1G69770 // AT3G61190 // AT2G33560 // AT1G19050
GO:0019725	P	cellular homeostasis	5	989	174	37767	0.48	1	// AT3G56090 // AT2G39450 // AT3G61190 // AT4G19690 // AT5G01600
GO:0060255	P	regulation of macromolecule metabolic process	61	989	2060	37767	0.18	1	// AT5G49520 // AT3G50060 // AT4G38620 // AT3G24310 // AT5G65310 // AT1G32640 // AT3G16350 // AT3G26744 // AT5G18560 // AT1G20340 // AT2G44840 // AT2G23290 // AT4G17460 // AT1G80840 // AT2G22760 // AT5G43650 // AT5G52010 // AT4G39070 // AT1G44830 // AT3G55980 // AT2G28550 // AT4G32800 // AT1G62975 // AT2G02820 // AT5G51990 // AT1G28310 // AT4G34410 // AT4G25480 // AT1G33760 // AT1G18400 // AT1G74…
GO:0003006	P	reproductive developmental process	27	989	978	37767	0.42	1	// AT3G28860 // AT2G34790 // AT5G18560 // AT3G45640 // AT5G05950 // AT4G30090 // AT4G37590 // AT2G28550 // AT2G46870 // AT5G37770 // AT5G01040 // AT1G19180 // AT4G28190 // AT5G53290 // AT1G75520 // AT1G69770 // AT4G19230 // AT4G31820 // AT2G16500 // AT1G07890 // AT3G56090 // AT4G00310 // AT5G01600 // AT4G34710 // AT2G22870 // AT1G01470 // AT2G21540
GO:0055114	P	oxidation reduction	8	989	203	37767	0.17	1	// AT5G66570 // AT4G04640 // AT4G03280 // AT2G46820 // AT1G55670 // AT1G04420 // AT1G60950 // AT1G64710
GO:0046483	P	heterocycle metabolic process	12	989	460	37767	0.55	1	// AT1G58290 // AT5G26030 // AT3G61750 // AT4G04640 // AT4G14690 // AT5G60890 // AT3G63110 // AT2G39800 // AT1G66430 // AT1G74470 // AT3G45640 // AT5G21482
GO:0019538	P	protein metabolic process	79	989	4009	37767	1	1	// AT1G32970 // AT2G41890 // AT1G01300 // AT1G12990 // AT5G19100 // AT3G56100 // AT2G05920 // AT5G46330 // AT5G15220 // AT3G06778 // AT2G43690 // AT2G27535 // AT3G54400 // AT5G37540 // AT4G16563 // AT3G44610 // AT2G05940 // AT4G11320 // AT3G59350 // AT5G03640 // AT2G24130 // AT2G39710 // AT5G66570 // AT1G69770 // AT5G19110 // AT5G48740 // AT2G21510 // AT1G75640 // AT1G68400 // AT1G49630 // AT4G35…
GO:0048878	P	chemical homeostasis	5	989	136	37767	0.29	1	// AT3G56090 // AT2G39450 // AT1G20340 // AT4G19690 // AT5G01600
GO:0002376	P	immune system process	13	989	368	37767	0.18	1	// AT1G80840 // AT5G11250 // AT4G12720 // AT2G35930 // AT1G66090 // AT5G50250 // AT5G45110 // AT5G37770 // AT5G46450 // AT5G22690 // AT5G64900 // AT2G20142 // AT4G31800
GO:0016567	P	protein ubiquitination	5	989	121	37767	0.22	1	// AT1G23410 // AT1G10560 // AT2G35930 // AT1G24330 // AT5G65920
GO:0007154	P	cell communication	9	989	1399	37767	1	1	// AT1G66270 // AT5G65310 // AT5G60890 // AT3G44320 // AT5G67070 // AT2G41890 // AT3G45640 // AT3G23805 // AT5G42100
GO:0033554	P	cellular response to stress	10	989	399	37767	0.6	1	// AT3G44320 // AT1G32640 // AT4G25100 // AT4G12720 // AT5G60890 // AT1G68760 // AT5G46330 // AT3G12710 // AT1G66270 // AT3G45640
GO:0051252	P	regulation of RNA metabolic process	33	989	996	37767	0.11	1	// AT5G49520 // AT3G50060 // AT1G80840 // AT5G65310 // AT1G32640 // AT5G18560 // AT2G44840 // AT2G23290 // AT4G17460 // AT3G24310 // AT5G51990 // AT1G44830 // AT2G28550 // AT4G32800 // AT2G02820 // AT4G34410 // AT4G25480 // AT1G33760 // AT4G37780 // AT5G53290 // AT5G21960 // AT1G69770 // AT4G25470 // AT1G21910 // AT3G03260 // AT1G77640 // AT4G31800 // AT1G64860 // AT4G16141 // AT2G22850 // AT1G14…
GO:0006807	P	nitrogen compound metabolic process	97	989	3826	37767	0.65	1	// AT1G58290 // AT3G50060 // AT3G61750 // AT3G24310 // AT4G14690 // AT1G80840 // AT5G21482 // AT5G43650 // AT1G69040 // AT3G26744 // AT1G28310 // AT3G12710 // AT5G50250 // AT1G74500 // AT5G17920 // AT4G37780 // AT5G23280 // AT5G65590 // AT5G21960 // AT3G23820 // AT3G57010 // AT4G25470 // AT1G21910 // AT2G20340 // AT3G03630 // AT3G18000 // AT2G22850 // AT2G46510 // AT4G34990 // AT5G51790 // AT5G43…
GO:0044267	P	cellular protein metabolic process	56	989	3487	37767	1	1	// AT2G41890 // AT1G12990 // AT3G56100 // AT3G45640 // AT5G46330 // AT5G15220 // AT3G06778 // AT2G43690 // AT2G27535 // AT3G44610 // AT2G05940 // AT3G59350 // AT5G03640 // AT2G24130 // AT5G66570 // AT5G48740 // AT2G21510 // AT1G75640 // AT3G01840 // AT1G78940 // AT1G64210 // AT1G67880 // AT5G25930 // AT2G42960 // AT1G51940 // AT2G47440 // AT3G27540 // AT4G36410 // AT1G17750 // AT5G24010 // AT1G10…
GO:0051186	P	cofactor metabolic process	5	989	308	37767	0.9	1	// AT1G58290 // AT5G26030 // AT4G14690 // AT1G74470 // AT1G55670
GO:0044260	P	cellular macromolecule metabolic process	133	989	6447	37767	1	1	// AT5G49520 // AT3G50060 // AT2G41890 // AT3G24310 // AT3G44320 // AT2G27535 // AT1G80840 // AT5G43650 // AT2G24130 // AT3G26744 // AT1G28310 // AT3G12710 // AT1G12900 // AT4G25480 // AT1G74500 // AT3G01840 // AT1G78940 // AT4G37780 // AT5G23280 // AT5G15220 // AT5G65590 // AT2G47440 // AT5G21960 // AT5G54380 // AT4G25470 // AT1G21910 // AT1G24330 // AT4G33920 // AT1G20340 // AT2G22850 // AT2G46…
GO:0016043	P	cellular component organization	30	989	1179	37767	0.59	1	// AT3G05470 // AT3G49120 // AT3G12110 // AT2G34790 // AT1G12040 // AT4G28250 // AT5G51600 // AT1G68060 // AT3G45970 // AT1G26770 // AT1G75780 // AT5G66570 // AT2G28950 // AT1G75100 // AT2G06850 // AT1G12560 // AT3G59550 // AT4G38400 // AT3G50660 // AT1G69770 // AT5G54380 // AT3G54710 // AT1G76540 // AT3G15370 // AT4G17030 // AT3G45960 // AT1G64860 // AT2G29890 // AT3G18000 // AT2G33560
GO:0065009	P	regulation of molecular function	5	989	153	37767	0.38	1	// AT1G32970 // AT2G05920 // AT3G45640 // AT5G63770 // AT1G32640
GO:0048646	P	anatomical structure formation involved in morphogenesis	5	989	122	37767	0.22	1	// AT1G26770 // AT2G28950 // AT5G51600 // AT4G28250 // AT1G77690
GO:0018130	P	heterocycle biosynthetic process	6	989	123	37767	0.11	1	// AT1G58290 // AT5G26030 // AT4G14690 // AT5G60890 // AT2G39800 // AT1G74470
GO:0016265	P	death	6	989	286	37767	0.76	1	// AT5G11250 // AT4G12720 // AT1G66090 // AT4G35350 // AT5G22690 // AT5G46450
GO:0009887	P	organ morphogenesis	5	989	241	37767	0.75	1	// AT5G65870 // AT2G22860 // AT2G28550 // AT4G01540 // AT3G50660
GO:0048316	P	seed development	13	989	530	37767	0.63	1	// AT5G53290 // AT2G16500 // AT1G07890 // AT2G34790 // AT1G01470 // AT4G00310 // AT1G69770 // AT4G34710 // AT4G19230 // AT5G05950 // AT2G22870 // AT4G31820 // AT4G30090
GO:0009309	P	amine biosynthetic process	10	989	229	37767	0.088	1	// AT4G34710 // AT1G11790 // AT5G60890 // AT2G36880 // AT3G03630 // AT3G18000 // AT2G39800 // AT3G03780 // AT3G17390 // AT5G17920
GO:0050793	P	regulation of developmental process	7	989	377	37767	0.86	1	// AT1G76540 // AT1G63030 // AT1G12610 // AT1G19050 // AT5G54380 // AT4G31820 // AT4G28190
GO:0006812	P	cation transport	13	989	357	37767	0.15	1	// AT4G04640 // AT4G13420 // AT4G33020 // AT3G56090 // AT5G45105 // AT2G39450 // AT4G19690 // AT2G37925 // AT5G01600 // AT2G26900 // AT5G50740 // AT3G58060 // AT1G51090
GO:0006811	P	ion transport	14	989	427	37767	0.24	1	// AT4G04640 // AT4G13420 // AT4G33020 // AT3G56090 // AT5G45105 // AT2G39450 // AT4G19690 // AT2G37925 // AT5G01600 // AT2G26900 // AT5G50740 // AT3G58060 // AT1G51090 // AT4G19030
GO:0009888	P	tissue development	11	989	359	37767	0.35	1	// AT3G62720 // AT1G76540 // AT1G63030 // AT2G02820 // AT1G12610 // AT1G12040 // AT1G14350 // AT3G62680 // AT5G16910 // AT5G64530 // AT4G28190
GO:0012501	P	programmed cell death	6	989	244	37767	0.62	1	// AT5G11250 // AT4G12720 // AT1G66090 // AT4G35350 // AT5G22690 // AT5G46450
GO:0043412	P	macromolecule modification	45	989	1636	37767	0.39	1	// AT2G41890 // AT1G12990 // AT3G56100 // AT3G44610 // AT5G46330 // AT2G43690 // AT3G27540 // AT3G45640 // AT2G05940 // AT3G44260 // AT3G59350 // AT5G03640 // AT2G24130 // AT5G66570 // AT1G75640 // AT5G50250 // AT5G48910 // AT3G01840 // AT1G78940 // AT1G67880 // AT5G25930 // AT2G42960 // AT1G51940 // AT1G17750 // AT5G24010 // AT1G10560 // AT1G69770 // AT5G54380 // AT1G76360 // AT5G40540 // AT1G64…
GO:0010015	P	root morphogenesis	6	989	114	37767	0.087	1	// AT1G12040 // AT3G62720 // AT5G18560 // AT1G77690 // AT3G62680 // AT5G16910
GO:0051239	P	regulation of multicellular organismal process	5	989	277	37767	0.85	1	// AT1G12610 // AT4G31820 // AT1G76540 // AT4G28190 // AT1G63030
GO:0042440	P	pigment metabolic process	5	989	134	37767	0.28	1	// AT1G58290 // AT5G26030 // AT3G53130 // AT4G14690 // AT1G74470
GO:0046148	P	pigment biosynthetic process	5	989	112	37767	0.18	1	// AT1G58290 // AT5G26030 // AT3G53130 // AT4G14690 // AT1G74470
GO:0008652	P	cellular amino acid biosynthetic process	8	989	202	37767	0.17	1	// AT1G11790 // AT5G60890 // AT2G36880 // AT3G03630 // AT2G39800 // AT3G03780 // AT3G17390 // AT5G17920
GO:0010154	P	fruit development	13	989	557	37767	0.7	1	// AT5G53290 // AT2G16500 // AT1G07890 // AT2G34790 // AT1G01470 // AT4G00310 // AT1G69770 // AT4G34710 // AT4G19230 // AT5G05950 // AT2G22870 // AT4G31820 // AT4G30090
GO:0048367	P	shoot development	12	989	355	37767	0.23	1	// AT5G53290 // AT2G46870 // AT2G02820 // AT3G56090 // AT4G01540 // AT3G14362 // AT3G50660 // AT1G14350 // AT5G01600 // AT5G64530 // AT4G31820 // AT5G63770
GO:0006355	P	regulation of transcription, DNA-dependent	33	989	987	37767	0.099	1	// AT5G49520 // AT3G50060 // AT1G80840 // AT5G65310 // AT1G32640 // AT5G18560 // AT2G44840 // AT2G23290 // AT4G17460 // AT3G24310 // AT5G51990 // AT1G44830 // AT2G28550 // AT4G32800 // AT2G02820 // AT4G34410 // AT4G25480 // AT1G33760 // AT4G37780 // AT5G53290 // AT5G21960 // AT1G69770 // AT4G25470 // AT1G21910 // AT3G03260 // AT1G77640 // AT4G31800 // AT1G64860 // AT4G16141 // AT2G22850 // AT1G14…
GO:0016070	P	RNA metabolic process	37	989	1657	37767	0.86	1	// AT5G49520 // AT3G50060 // AT3G24310 // AT5G65310 // AT1G32640 // AT5G18560 // AT2G44840 // AT2G23290 // AT4G17460 // AT1G80840 // AT3G44260 // AT5G51990 // AT5G50250 // AT2G28550 // AT4G32800 // AT2G02820 // AT4G34410 // AT4G25480 // AT5G48910 // AT1G33760 // AT4G37780 // AT5G53290 // AT1G44830 // AT5G21960 // AT1G69770 // AT4G25470 // AT1G21910 // AT3G03260 // AT1G77640 // AT4G31800 // AT1G64…
GO:0006350	P	transcription	59	989	1923	37767	0.12	1	// AT5G49520 // AT3G50060 // AT4G38620 // AT3G24310 // AT5G65310 // AT1G32640 // AT3G16350 // AT3G26744 // AT5G18560 // AT2G13640 // AT2G44840 // AT2G23290 // AT4G17460 // AT1G80840 // AT2G22760 // AT5G43650 // AT5G52010 // AT4G39070 // AT1G44830 // AT2G28550 // AT4G32800 // AT1G62975 // AT2G02820 // AT5G51990 // AT1G28310 // AT4G34410 // AT4G25480 // AT1G33760 // AT1G18400 // AT1G74500 // AT5G62…
GO:0006351	P	transcription, DNA-dependent	33	989	1039	37767	0.16	1	// AT5G49520 // AT3G50060 // AT1G80840 // AT5G65310 // AT1G32640 // AT5G18560 // AT2G44840 // AT2G23290 // AT4G17460 // AT3G24310 // AT5G51990 // AT1G44830 // AT2G28550 // AT4G32800 // AT2G02820 // AT4G34410 // AT4G25480 // AT1G33760 // AT4G37780 // AT5G53290 // AT5G21960 // AT1G69770 // AT4G25470 // AT1G21910 // AT3G03260 // AT1G77640 // AT4G31800 // AT1G64860 // AT4G16141 // AT2G22850 // AT1G14…
GO:0006520	P	cellular amino acid metabolic process	15	989	430	37767	0.17	1	// AT1G69040 // AT3G61750 // AT1G11790 // AT5G60890 // AT2G20340 // AT3G03630 // AT4G37770 // AT4G13930 // AT4G08040 // AT2G39800 // AT3G03780 // AT3G17390 // AT5G17920 // AT2G36880 // AT3G07420
GO:0008152	P	metabolic process	296	989	10614	37767	0.11	1	// AT1G58290 // AT3G50060 // AT3G61580 // AT2G41890 // AT1G01300 // AT4G14690 // AT1G29930 // AT3G44320 // AT4G01950 // AT5G07010 // AT3G16370 // AT4G17460 // AT4G19230 // AT3G61750 // AT5G14700 // AT1G12990 // AT3G24310 // AT5G21482 // AT3G59350 // AT3G23810 // AT4G03280 // AT2G24130 // AT1G05800 // AT1G56720 // AT3G26744 // AT3G15530 // AT1G28310 // AT5G19100 // AT5G58480 // AT1G12900 // AT5G50…
GO:0044265	P	cellular macromolecule catabolic process	8	989	465	37767	0.92	1	// AT4G36410 // AT1G23410 // AT4G21590 // AT3G44320 // AT1G12900 // AT5G25980 // AT4G17090 // AT5G26000
GO:0050801	P	ion homeostasis	5	989	103	37767	0.14	1	// AT3G56090 // AT2G39450 // AT1G20340 // AT4G19690 // AT5G01600
GO:0030154	P	cell differentiation	12	989	355	37767	0.23	1	// AT3G62720 // AT2G02820 // AT2G34790 // AT1G12040 // AT5G65870 // AT1G14350 // AT3G62680 // AT1G19050 // AT2G22860 // AT5G16910 // AT5G57800 // AT4G35350
GO:0009790	P	embryonic development	10	989	535	37767	0.89	1	// AT5G53290 // AT1G07890 // AT2G34790 // AT1G01470 // AT4G00310 // AT1G69770 // AT5G05950 // AT2G22870 // AT4G31820 // AT4G30090
GO:0009793	P	embryonic development ending in seed dormancy	10	989	465	37767	0.77	1	// AT5G53290 // AT1G07890 // AT2G34790 // AT1G01470 // AT4G00310 // AT1G69770 // AT5G05950 // AT2G22870 // AT4G31820 // AT4G30090
GO:0070882	P	cellular cell wall organization or biogenesis	5	989	247	37767	0.77	1	// AT3G44990 // AT4G18780 // AT5G44030 // AT5G17420 // AT5G16910
GO:0070887	P	cellular response to chemical stimulus	15	989	452	37767	0.22	1	// AT5G15230 // AT1G76540 // AT4G25100 // AT1G32640 // AT4G01540 // AT3G48100 // AT4G18780 // AT5G44030 // AT2G44840 // AT1G19050 // AT5G54380 // AT3G45640 // AT5G62920 // AT1G19180 // AT5G65310
GO:0008544	P	epidermis development	6	989	153	37767	0.22	1	// AT3G62720 // AT2G02820 // AT1G12040 // AT1G14350 // AT3G62680 // AT5G16910
GO:0048229	P	gametophyte development	7	989	233	37767	0.41	1	// AT2G34790 // AT4G00310 // AT3G18000 // AT3G59550 // AT2G34920 // AT1G19180 // AT5G57800
GO:0006139	P	nucleobase, nucleoside, nucleotide and nucleic acid metabolic process	74	989	3198	37767	0.88	1	// AT5G49520 // AT3G50060 // AT4G38620 // AT3G24310 // AT5G65310 // AT1G32640 // AT1G55670 // AT3G16350 // AT4G04640 // AT3G26744 // AT5G18560 // AT2G13640 // AT2G44840 // AT2G23290 // AT3G17390 // AT4G17460 // AT1G80840 // AT2G22760 // AT5G43650 // AT5G52010 // AT4G39070 // AT5G50250 // AT2G28550 // AT4G32800 // AT1G62975 // AT1G69770 // AT2G02820 // AT5G51990 // AT1G28310 // AT3G12710 // AT4G30…
GO:0009555	P	pollen development	5	989	148	37767	0.35	1	// AT2G34920 // AT1G19180 // AT5G57800 // AT3G59550 // AT3G18000
GO:0051641	P	cellular localization	7	989	569	37767	0.99	1	// AT5G53290 // AT5G46330 // AT1G75100 // AT5G52000 // AT4G24570 // AT5G59730 // AT2G22500
GO:0048827	P	phyllome development	8	989	258	37767	0.37	1	// AT5G53290 // AT2G46870 // AT4G01540 // AT3G56090 // AT3G50660 // AT5G01600 // AT4G31820 // AT5G63770
GO:0044248	P	cellular catabolic process	11	989	746	37767	0.99	1	// AT3G61750 // AT1G23410 // AT1G17190 // AT4G21590 // AT3G44320 // AT1G12900 // AT5G25980 // AT4G17090 // AT4G36410 // AT2G29440 // AT5G26000
GO:0006508	P	proteolysis	24	989	810	37767	0.3	1	// AT3G54400 // AT1G01300 // AT5G19100 // AT2G05920 // AT1G32970 // AT4G16563 // AT4G11320 // AT2G39710 // AT5G37540 // AT1G49630 // AT4G35350 // AT3G43960 // AT5G19110 // AT2G22970 // AT5G51750 // AT4G36410 // AT1G23410 // AT3G61820 // AT5G42240 // AT3G25700 // AT5G10770 // AT5G07030 // AT5G22860 // AT3G48350
GO:0044275	P	cellular carbohydrate catabolic process	5	989	125	37767	0.24	1	// AT5G25980 // AT5G26000 // AT4G17090 // AT3G44320 // AT1G12900
GO:0032501	P	multicellular organismal process	65	989	2094	37767	0.095	1	// AT3G50060 // AT3G28860 // AT2G41890 // AT1G63030 // AT5G53290 // AT2G34790 // AT1G12040 // AT5G18560 // AT3G15540 // AT4G16750 // AT2G39800 // AT5G64530 // AT3G45640 // AT5G05950 // AT5G50820 // AT4G30090 // AT5G48010 // AT4G37590 // AT4G31820 // AT2G46870 // AT3G26744 // AT2G02820 // AT1G12610 // AT3G14362 // AT5G65870 // AT4G27410 // AT1G77690 // AT3G62680 // AT3G50660 // AT5G01040 // AT2G22…
GO:0048608	P	reproductive structure development	27	989	978	37767	0.42	1	// AT3G28860 // AT2G34790 // AT5G18560 // AT3G45640 // AT5G05950 // AT4G30090 // AT4G37590 // AT2G28550 // AT2G46870 // AT5G37770 // AT5G01040 // AT1G19180 // AT4G28190 // AT5G53290 // AT1G75520 // AT1G69770 // AT4G19230 // AT4G31820 // AT2G16500 // AT1G07890 // AT3G56090 // AT4G00310 // AT5G01600 // AT4G34710 // AT2G22870 // AT1G01470 // AT2G21540
GO:0044238	P	primary metabolic process	245	989	8995	37767	0.25	1	// AT5G49520 // AT3G50060 // AT3G61580 // AT2G41890 // AT1G01300 // AT5G19100 // AT3G44320 // AT5G07010 // AT3G16370 // AT4G17460 // AT4G19230 // AT3G61750 // AT5G14700 // AT3G24310 // AT3G59350 // AT2G24130 // AT1G05800 // AT1G56670 // AT3G26744 // AT1G28310 // AT5G58480 // AT1G12900 // AT5G50250 // AT1G74500 // AT5G17920 // AT3G01840 // AT1G78940 // AT5G48740 // AT4G37780 // AT5G23280 // AT5G15…
GO:0006721	P	terpenoid metabolic process	5	989	126	37767	0.24	1	// AT5G47990 // AT4G19230 // AT3G53130 // AT4G18780 // AT5G48010
GO:0006720	P	isoprenoid metabolic process	5	989	168	37767	0.45	1	// AT5G47990 // AT4G19230 // AT3G53130 // AT4G18780 // AT5G48010
GO:0043687	P	post-translational protein modification	38	989	1248	37767	0.2	1	// AT2G41890 // AT3G56100 // AT3G44610 // AT5G46330 // AT2G43690 // AT3G45640 // AT2G05940 // AT3G59350 // AT5G03640 // AT2G24130 // AT5G66570 // AT1G75640 // AT3G01840 // AT1G78940 // AT5G43020 // AT5G25930 // AT2G42960 // AT1G51940 // AT1G17750 // AT5G24010 // AT1G10560 // AT1G69770 // AT5G54380 // AT1G76360 // AT5G40540 // AT1G64210 // AT1G68400 // AT5G48740 // AT1G24330 // AT5G51560 // AT5G40…
GO:0009987	P	cellular process	310	989	11684	37767	0.4	1	// AT3G05470 // AT3G50060 // AT5G07010 // AT2G41890 // AT3G24310 // AT4G14690 // AT1G29930 // AT2G34930 // AT3G44320 // AT1G68360 // AT4G19230 // AT4G28250 // AT3G61750 // AT5G46450 // AT1G80840 // AT2G20142 // AT5G21482 // AT3G59350 // AT1G76310 // AT3G23810 // AT4G03280 // AT2G24130 // AT4G18510 // AT1G05800 // AT3G26744 // AT2G19780 // AT3G12110 // AT3G12710 // AT1G12900 // AT4G25480 // AT1G19…
GO:0048583	P	regulation of response to stimulus	6	989	188	37767	0.38	1	// AT1G80840 // AT5G65310 // AT4G12720 // AT3G61190 // AT3G45640 // AT4G31800
GO:0032870	P	cellular response to hormone stimulus	12	989	321	37767	0.15	1	// AT5G15230 // AT1G76540 // AT5G65310 // AT4G01540 // AT3G48100 // AT4G18780 // AT5G44030 // AT2G44840 // AT1G19050 // AT5G54380 // AT3G45640 // AT5G62920
GO:0030001	P	metal ion transport	8	989	224	37767	0.24	1	// AT4G19690 // AT4G13420 // AT5G50740 // AT1G51090 // AT2G37925 // AT5G01600 // AT2G26900 // AT3G56090
GO:0006955	P	immune response	13	989	367	37767	0.18	1	// AT1G80840 // AT5G11250 // AT4G12720 // AT2G35930 // AT1G66090 // AT5G50250 // AT5G45110 // AT5G37770 // AT5G46450 // AT5G22690 // AT5G64900 // AT2G20142 // AT4G31800
GO:0055080	P	cation homeostasis	5	989	90	37767	0.096	1	// AT3G56090 // AT2G39450 // AT1G20340 // AT4G19690 // AT5G01600
GO:0009408	P	response to heat	6	989	161	37767	0.26	1	// AT1G07890 // AT5G37770 // AT3G61190 // AT5G57560 // AT4G21870 // AT2G27140
GO:0044255	P	cellular lipid metabolic process	22	989	618	37767	0.099	1	// AT5G07010 // AT4G18780 // AT3G07960 // AT4G19230 // AT3G53130 // AT1G17420 // AT5G48010 // AT1G05800 // AT5G42650 // AT1G01600 // AT2G06050 // AT2G29980 // AT1G25450 // AT1G20510 // AT3G25780 // AT5G38020 // AT5G47990 // AT3G18000 // AT2G15090 // AT1G51500 // AT5G57800 // AT1G72520
GO:0009642	P	response to light intensity	5	989	90	37767	0.096	1	// AT3G59220 // AT5G37770 // AT2G06850 // AT5G66570 // AT1G01470
GO:0055086	P	nucleobase, nucleoside and nucleotide metabolic process	5	989	221	37767	0.69	1	// AT1G55670 // AT2G36880 // AT4G04640 // AT3G17390 // AT3G53900
GO:0033036	P	macromolecule localization	17	989	462	37767	0.11	1	// AT2G38530 // AT3G22120 // AT2G38540 // AT5G53290 // AT3G51600 // AT5G46330 // AT1G27950 // AT5G64080 // AT5G52000 // AT1G17840 // AT2G44300 // AT1G12090 // AT3G43720 // AT5G01870 // AT4G31820 // AT4G12520 // AT3G53980
GO:0007242	P	intracellular signaling cascade	20	989	659	37767	0.29	1	// AT5G15230 // AT1G76540 // AT5G65310 // AT1G32640 // AT4G01540 // AT3G48100 // AT4G12720 // AT4G18780 // AT5G54030 // AT5G44030 // AT5G39471 // AT1G61840 // AT2G44840 // AT5G37770 // AT1G19050 // AT5G54380 // AT3G45640 // AT5G62920 // AT1G19180 // AT3G07000
GO:0043170	P	macromolecule metabolic process	162	989	7127	37767	0.98	1	// AT5G49520 // AT3G50060 // AT2G41890 // AT1G01300 // AT5G19100 // AT3G44320 // AT2G27535 // AT3G24310 // AT5G43650 // AT2G24130 // AT3G26744 // AT1G28310 // AT3G12710 // AT1G12900 // AT4G25480 // AT1G74500 // AT3G01840 // AT1G78940 // AT4G37780 // AT5G23280 // AT5G15220 // AT5G65590 // AT2G47440 // AT5G21960 // AT5G54380 // AT3G54400 // AT4G25470 // AT1G21910 // AT1G24330 // AT4G33920 // AT3G61…
GO:0007398	P	ectoderm development	6	989	153	37767	0.22	1	// AT3G62720 // AT2G02820 // AT1G12040 // AT1G14350 // AT3G62680 // AT5G16910
GO:0022402	P	cell cycle process	6	989	149	37767	0.21	1	// AT1G76540 // AT2G33560 // AT1G69770 // AT5G51600 // AT3G59550 // AT1G70210
GO:0009066	P	aspartate family amino acid metabolic process	5	989	90	37767	0.096	1	// AT4G08040 // AT3G03780 // AT4G37770 // AT3G17390 // AT5G17920
GO:0042592	P	homeostatic process	6	989	216	37767	0.5	1	// AT3G56090 // AT2G39450 // AT1G20340 // AT4G19690 // AT5G01600 // AT3G61190
GO:0008219	P	cell death	6	989	286	37767	0.76	1	// AT5G11250 // AT4G12720 // AT1G66090 // AT4G35350 // AT5G22690 // AT5G46450
GO:0007275	P	multicellular organismal development	62	989	2020	37767	0.12	1	// AT3G50060 // AT3G28860 // AT1G63030 // AT5G53290 // AT2G34790 // AT1G12040 // AT5G18560 // AT4G16750 // AT2G39800 // AT5G64530 // AT3G45640 // AT5G05950 // AT5G50820 // AT4G30090 // AT5G48010 // AT4G37590 // AT4G31820 // AT2G46870 // AT3G26744 // AT2G02820 // AT1G12610 // AT3G14362 // AT5G65870 // AT4G27410 // AT1G77690 // AT3G62680 // AT3G50660 // AT5G01040 // AT2G22860 // AT5G16910 // AT1G19…
GO:0009639	P	response to red or far red light	6	989	210	37767	0.47	1	// AT3G28860 // AT4G14690 // AT3G27690 // AT1G80730 // AT3G48100 // AT4G19230
GO:0009735	P	response to cytokinin stimulus	5	989	94	37767	0.11	1	// AT1G69040 // AT5G62920 // AT3G48100 // AT1G19050 // AT4G01540
GO:0048366	P	leaf development	7	989	233	37767	0.41	1	// AT5G53290 // AT2G46870 // AT4G01540 // AT3G56090 // AT3G50660 // AT5G01600 // AT5G63770
GO:0010467	P	gene expression	71	989	3962	37767	1	1	// AT5G49520 // AT3G50060 // AT4G38620 // AT1G23410 // AT3G24310 // AT5G65310 // AT1G32640 // AT3G16350 // AT3G26744 // AT5G18560 // AT5G15760 // AT2G27535 // AT2G44840 // AT2G23290 // AT4G17460 // AT1G80840 // AT2G22760 // AT5G43650 // AT5G52010 // AT4G39070 // AT1G76720 // AT2G28550 // AT4G32800 // AT1G62975 // AT2G02820 // AT5G51990 // AT1G28310 // AT4G34410 // AT4G25480 // AT1G33760 // AT1G49…
GO:0009908	P	flower development	12	989	377	37767	0.29	1	// AT4G37590 // AT3G28860 // AT1G19180 // AT2G46870 // AT3G56090 // AT5G18560 // AT1G75520 // AT5G01600 // AT3G45640 // AT4G31820 // AT4G28190 // AT2G21540
GO:0010468	P	regulation of gene expression	60	989	2001	37767	0.16	1	// AT5G49520 // AT3G50060 // AT4G38620 // AT3G24310 // AT5G65310 // AT1G32640 // AT3G16350 // AT3G26744 // AT5G18560 // AT1G20340 // AT2G44840 // AT2G23290 // AT4G17460 // AT1G80840 // AT2G22760 // AT5G43650 // AT5G52010 // AT4G39070 // AT1G44830 // AT2G28550 // AT4G32800 // AT1G62975 // AT2G02820 // AT5G51990 // AT1G28310 // AT4G34410 // AT4G25480 // AT1G33760 // AT1G18400 // AT1G74500 // AT5G62…
GO:0006468	P	protein amino acid phosphorylation	30	989	946	37767	0.17	1	// AT2G41890 // AT3G56100 // AT3G44610 // AT5G46330 // AT2G43690 // AT3G45640 // AT2G05940 // AT3G59350 // AT5G03640 // AT2G24130 // AT1G76540 // AT1G75640 // AT3G01840 // AT1G78940 // AT5G43020 // AT5G25930 // AT2G42960 // AT1G51940 // AT1G17750 // AT5G24010 // AT5G54380 // AT1G76360 // AT5G40540 // AT1G64210 // AT1G68400 // AT5G48740 // AT5G51560 // AT5G40030 // AT1G56720 // AT1G70130
GO:0019219	P	regulation of nucleobase, nucleoside, nucleotide and nucleic acid metabolic process	58	989	1847	37767	0.095	1	// AT5G49520 // AT3G50060 // AT4G38620 // AT3G24310 // AT5G65310 // AT1G32640 // AT3G16350 // AT3G26744 // AT5G18560 // AT2G44840 // AT2G23290 // AT4G17460 // AT1G80840 // AT2G22760 // AT5G43650 // AT5G52010 // AT4G39070 // AT1G44830 // AT2G28550 // AT4G32800 // AT1G62975 // AT2G02820 // AT5G51990 // AT1G28310 // AT4G34410 // AT4G25480 // AT1G33760 // AT1G18400 // AT1G74500 // AT5G62470 // AT4G37…
GO:0045087	P	innate immune response	11	989	347	37767	0.31	1	// AT5G11250 // AT4G12720 // AT2G35930 // AT1G66090 // AT5G50250 // AT5G45110 // AT5G37770 // AT5G46450 // AT5G22690 // AT5G64900 // AT2G20142
GO:0000271	P	polysaccharide biosynthetic process	5	989	112	37767	0.18	1	// AT5G17420 // AT4G18780 // AT5G44030 // AT3G62720 // AT5G16910
GO:0006464	P	protein modification process	42	989	1474	37767	0.31	1	// AT2G41890 // AT1G12990 // AT3G56100 // AT3G44610 // AT5G46330 // AT2G43690 // AT3G27540 // AT3G45640 // AT2G05940 // AT3G59350 // AT5G03640 // AT2G24130 // AT5G66570 // AT1G75640 // AT3G01840 // AT1G78940 // AT1G67880 // AT5G25930 // AT2G42960 // AT1G51940 // AT1G17750 // AT5G24010 // AT1G10560 // AT1G69770 // AT5G54380 // AT1G76360 // AT5G40540 // AT1G64210 // AT1G37150 // AT1G68400 // AT5G48…
GO:0010817	P	regulation of hormone levels	7	989	168	37767	0.16	1	// AT3G28860 // AT4G31820 // AT2G45400 // AT1G77690 // AT3G50660 // AT3G63110 // AT5G21482
GO:0022414	P	reproductive process	33	989	1161	37767	0.34	1	// AT3G28860 // AT2G41890 // AT2G34790 // AT5G18560 // AT4G00310 // AT3G45640 // AT5G05950 // AT4G30090 // AT4G37590 // AT2G28550 // AT2G46870 // AT4G00080 // AT5G37770 // AT5G01040 // AT1G71880 // AT1G19180 // AT4G28190 // AT5G53290 // AT1G25450 // AT1G75520 // AT1G69770 // AT4G19230 // AT4G31820 // AT2G16500 // AT1G07890 // AT3G56090 // AT5G01370 // AT5G01600 // AT4G34710 // AT2G22870 // AT5G57…
GO:0009058	P	biosynthetic process	139	989	5118	37767	0.34	1	// AT1G58290 // AT3G50060 // AT3G24310 // AT4G14690 // AT2G27535 // AT1G80840 // AT5G43650 // AT1G05800 // AT3G26744 // AT1G28310 // AT4G25480 // AT1G74500 // AT5G17920 // AT4G37780 // AT5G23280 // AT5G15220 // AT5G65590 // AT3G50760 // AT5G21960 // AT1G20510 // AT3G57010 // AT4G25470 // AT1G21910 // AT3G03630 // AT1G20340 // AT3G18000 // AT2G22850 // AT3G51240 // AT2G46510 // AT4G34990 // AT5G51…
GO:0009059	P	macromolecule biosynthetic process	79	989	3685	37767	0.97	1	// AT5G49520 // AT3G50060 // AT4G38620 // AT3G25660 // AT3G24310 // AT5G65310 // AT1G32640 // AT3G16350 // AT5G44030 // AT5G18560 // AT5G15760 // AT2G27535 // AT2G44840 // AT5G17420 // AT2G23290 // AT4G17460 // AT1G80840 // AT2G22760 // AT5G43650 // AT5G52010 // AT1G12990 // AT4G39070 // AT1G76720 // AT2G28550 // AT4G32800 // AT1G62975 // AT2G02820 // AT5G51990 // AT1G28310 // AT1G20340 // AT4G34…
GO:0051649	P	establishment of localization in cell	6	989	525	37767	0.99	1	// AT5G53290 // AT1G75100 // AT5G52000 // AT4G24570 // AT5G59730 // AT2G22500
GO:0009056	P	catabolic process	18	989	1307	37767	1	1	// AT1G17190 // AT1G21880 // AT3G61750 // AT1G23410 // AT3G16920 // AT4G21590 // AT1G51940 // AT3G44320 // AT1G12900 // AT5G25980 // AT4G17090 // AT4G36410 // AT2G29440 // AT3G01840 // AT5G26000 // AT1G68560 // AT5G64570 // AT5G21482
GO:0009057	P	macromolecule catabolic process	10	989	982	37767	1	1	// AT4G36410 // AT1G23410 // AT4G21590 // AT3G44320 // AT1G12900 // AT5G25980 // AT4G17090 // AT5G26000 // AT1G68560 // AT5G64570
GO:0006091	P	generation of precursor metabolites and energy	9	989	285	37767	0.34	1	// AT5G66570 // AT4G04640 // AT1G12900 // AT3G61470 // AT4G03280 // AT4G12800 // AT2G46820 // AT1G55670 // AT1G60950
GO:0006996	P	organelle organization	12	989	640	37767	0.91	1	// AT3G05470 // AT1G68060 // AT1G76540 // AT3G59550 // AT3G12110 // AT2G34790 // AT2G29890 // AT1G75100 // AT1G69770 // AT5G51600 // AT2G33560 // AT3G54710
GO:0007017	P	microtubule-based process	5	989	114	37767	0.19	1	// AT1G20010 // AT5G51600 // AT2G28620 // AT2G22610 // AT2G47500
GO:0007010	P	cytoskeleton organization	5	989	145	37767	0.34	1	// AT3G05470 // AT1G68060 // AT5G51600 // AT2G29890 // AT3G12110
GO:0009913	P	epidermal cell differentiation	6	989	151	37767	0.21	1	// AT3G62720 // AT2G02820 // AT1G12040 // AT1G14350 // AT3G62680 // AT5G16910
GO:0044237	P	cellular metabolic process	219	989	8722	37767	0.77	1	// AT1G58290 // AT3G50060 // AT5G07010 // AT2G41890 // AT3G24310 // AT4G14690 // AT1G29930 // AT3G44320 // AT1G68360 // AT4G19230 // AT3G61750 // AT5G14700 // AT1G80840 // AT5G21482 // AT3G59350 // AT3G23810 // AT4G03280 // AT2G24130 // AT1G05800 // AT3G26744 // AT1G28310 // AT3G12710 // AT1G12900 // AT4G25480 // AT1G74500 // AT5G17920 // AT3G01840 // AT1G78940 // AT1G64210 // AT4G37780 // AT5G23…
GO:0006066	P	alcohol metabolic process	6	989	270	37767	0.71	1	// AT3G01260 // AT1G12900 // AT3G18000 // AT1G66430 // AT5G41080 // AT4G18010
GO:0006796	P	phosphate metabolic process	35	989	1178	37767	0.25	1	// AT2G41890 // AT3G56100 // AT3G44610 // AT5G46330 // AT2G43690 // AT1G51940 // AT3G45640 // AT2G05940 // AT3G59350 // AT5G03640 // AT2G24130 // AT5G66570 // AT1G75640 // AT3G01840 // AT1G78940 // AT5G43020 // AT5G25930 // AT2G42960 // AT4G04640 // AT1G17750 // AT5G24010 // AT5G54380 // AT1G76360 // AT5G40540 // AT4G18010 // AT1G64210 // AT1G68400 // AT5G48740 // AT5G51560 // AT5G40030 // AT4G33…
GO:0044085	P	cellular component biogenesis	9	989	571	37767	0.96	1	// AT5G66570 // AT3G44990 // AT4G18780 // AT1G64860 // AT2G29890 // AT5G44030 // AT5G51600 // AT5G16910 // AT5G17420
GO:0006793	P	phosphorus metabolic process	35	989	1179	37767	0.25	1	// AT2G41890 // AT3G56100 // AT3G44610 // AT5G46330 // AT2G43690 // AT1G51940 // AT3G45640 // AT2G05940 // AT3G59350 // AT5G03640 // AT2G24130 // AT5G66570 // AT1G75640 // AT3G01840 // AT1G78940 // AT5G43020 // AT5G25930 // AT2G42960 // AT4G04640 // AT1G17750 // AT5G24010 // AT5G54380 // AT1G76360 // AT5G40540 // AT4G18010 // AT1G64210 // AT1G68400 // AT5G48740 // AT5G51560 // AT5G40030 // AT4G33…
GO:0006259	P	DNA metabolic process	5	989	405	37767	0.98	1	// AT1G69770 // AT2G20980 // AT3G12710 // AT4G21590 // AT3G54710
GO:0044249	P	cellular biosynthetic process	126	989	4925	37767	0.62	1	// AT1G58290 // AT3G50060 // AT3G24310 // AT4G14690 // AT2G27535 // AT1G80840 // AT5G43650 // AT1G05800 // AT3G26744 // AT1G28310 // AT4G25480 // AT1G74500 // AT5G17920 // AT4G37780 // AT5G23280 // AT5G15220 // AT5G65590 // AT5G21960 // AT1G20510 // AT3G57010 // AT4G25470 // AT1G21910 // AT3G03630 // AT1G20340 // AT3G18000 // AT2G22850 // AT3G51240 // AT2G46510 // AT4G34990 // AT5G51790 // AT5G43…
GO:0006412	P	translation	10	989	1445	37767	1	1	// AT5G15220 // AT1G23410 // AT3G25660 // AT1G20340 // AT5G15760 // AT1G76720 // AT2G27535 // AT4G31460 // AT3G07420 // AT3G11120
GO:0048523	P	negative regulation of cellular process	8	989	234	37767	0.28	1	// AT4G38620 // AT1G05800 // AT5G66570 // AT2G29890 // AT1G20340 // AT1G69770 // AT1G19050 // AT2G33560
GO:0004713	F	protein tyrosine kinase activity	5	989	203	37767	0.62	1	// AT5G24010 // AT2G41890 // AT3G59350 // AT5G51560 // AT3G01840
GO:0017171	F	serine hydrolase activity	5	989	186	37767	0.54	1	// AT1G32970 // AT5G22860 // AT2G05920 // AT5G42240 // AT2G22970
GO:0016818	F	hydrolase activity, acting on acid anhydrides, in phosphorus-containing anhydrides	21	989	837	37767	0.61	1	// AT1G76720 // AT3G28860 // AT4G24710 // AT3G50240 // AT3G28345 // AT2G47500 // AT4G12720 // AT1G27770 // AT1G68760 // AT3G24530 // AT2G28620 // AT1G66090 // AT1G17840 // AT3G44630 // AT5G46450 // AT2G22610 // AT3G50930 // AT1G18370 // AT1G51500 // AT2G21450 // AT5G27000
GO:0016817	F	hydrolase activity, acting on acid anhydrides	21	989	839	37767	0.61	1	// AT1G76720 // AT3G28860 // AT4G24710 // AT3G50240 // AT3G28345 // AT2G47500 // AT4G12720 // AT1G27770 // AT1G68760 // AT3G24530 // AT2G28620 // AT1G66090 // AT1G17840 // AT3G44630 // AT5G46450 // AT2G22610 // AT3G50930 // AT1G18370 // AT1G51500 // AT2G21450 // AT5G27000
GO:0005488	F	binding	285	989	11258	37767	0.76	1	// AT3G05470 // AT3G50060 // AT2G41890 // AT3G24310 // AT4G14690 // AT1G29930 // AT2G34930 // AT2G02000 // AT3G28880 // AT4G38620 // AT3G27960 // AT1G68360 // AT2G28210 // AT5G06870 // AT3G50930 // AT5G46450 // AT5G64530 // AT1G65390 // AT3G22830 // AT3G59350 // AT1G76790 // AT1G23030 // AT4G37400 // AT3G51280 // AT2G19780 // AT5G41400 // AT5G58480 // AT4G25470 // AT5G50250 // AT4G16750 // AT2G34…
GO:0015399	F	primary active transmembrane transporter activity	6	989	244	37767	0.62	1	// AT3G28860 // AT1G27770 // AT5G63850 // AT1G17840 // AT3G28345 // AT1G51500
GO:0017076	F	purine nucleotide binding	36	989	1713	37767	0.93	1	// AT2G46760 // AT2G41890 // AT3G56100 // AT2G34810 // AT5G46330 // AT1G66090 // AT3G07960 // AT3G44630 // AT3G09910 // AT5G46450 // AT3G50930 // AT4G26510 // AT2G05940 // AT3G59350 // AT2G21450 // AT2G24130 // AT1G75640 // AT3G01840 // AT5G43020 // AT2G42960 // AT5G11250 // AT3G24530 // AT2G47500 // AT1G17750 // AT5G24010 // AT2G22610 // AT1G76360 // AT5G22690 // AT4G24710 // AT1G64210 // AT3G44…
GO:0004842	F	ubiquitin-protein ligase activity	7	989	324	37767	0.74	1	// AT3G61590 // AT1G23030 // AT4G36410 // AT1G24330 // AT2G35930 // AT1G10560 // AT5G65920
GO:0016773	F	phosphotransferase activity, alcohol group as acceptor	29	989	1154	37767	0.61	1	// AT2G41890 // AT3G56100 // AT5G46330 // AT3G07960 // AT3G60550 // AT3G45640 // AT2G05940 // AT3G59350 // AT2G24130 // AT1G76540 // AT1G75640 // AT1G66430 // AT3G01840 // AT5G43020 // AT2G45080 // AT2G42960 // AT1G17750 // AT5G24010 // AT5G54380 // AT3G54710 // AT1G76360 // AT5G40540 // AT5G38280 // AT1G64210 // AT1G68400 // AT5G51560 // AT4G37630 // AT1G56720 // AT5G63770
GO:0016772	F	transferase activity, transferring phosphorus-containing groups	48	989	1887	37767	0.6	1	// AT1G05100 // AT2G41890 // AT3G56100 // AT1G12040 // AT5G46330 // AT4G26510 // AT3G07960 // AT3G60550 // AT3G44610 // AT2G05940 // AT3G59350 // AT5G03640 // AT2G24130 // AT1G76540 // AT5G60890 // AT1G75640 // AT1G66430 // AT3G01840 // AT1G78940 // AT5G43020 // AT2G45080 // AT5G25930 // AT2G42960 // AT1G51940 // AT4G26890 // AT1G17750 // AT5G24010 // AT3G45640 // AT5G43780 // AT5G54380 // AT3G54…
GO:0008415	F	acyltransferase activity	5	989	231	37767	0.72	1	// AT4G01950 // AT2G15090 // AT1G75880 // AT1G02390 // AT1G25450
GO:0032559	F	adenyl ribonucleotide binding	31	989	1384	37767	0.83	1	// AT4G26510 // AT2G41890 // AT3G56100 // AT5G46330 // AT1G66090 // AT3G07960 // AT3G44630 // AT5G46450 // AT3G50930 // AT2G05940 // AT3G59350 // AT2G21450 // AT2G24130 // AT1G75640 // AT3G01840 // AT5G43020 // AT2G42960 // AT5G11250 // AT3G24530 // AT2G47500 // AT1G17750 // AT5G24010 // AT2G22610 // AT1G76360 // AT5G22690 // AT4G24710 // AT1G64210 // AT1G68400 // AT5G51560 // AT2G28620 // AT1G56…
GO:0032555	F	purine ribonucleotide binding	33	989	1631	37767	0.95	1	// AT4G26510 // AT2G41890 // AT3G56100 // AT5G46330 // AT1G66090 // AT3G07960 // AT3G44630 // AT3G09910 // AT5G46450 // AT3G50930 // AT2G05940 // AT3G59350 // AT2G21450 // AT2G24130 // AT1G75640 // AT3G01840 // AT5G43020 // AT2G42960 // AT5G11250 // AT3G24530 // AT2G47500 // AT1G17750 // AT5G24010 // AT2G22610 // AT1G76360 // AT5G22690 // AT4G24710 // AT1G64210 // AT1G68400 // AT5G51560 // AT2G28…
GO:0032553	F	ribonucleotide binding	33	989	1631	37767	0.95	1	// AT4G26510 // AT2G41890 // AT3G56100 // AT5G46330 // AT1G66090 // AT3G07960 // AT3G44630 // AT3G09910 // AT5G46450 // AT3G50930 // AT2G05940 // AT3G59350 // AT2G21450 // AT2G24130 // AT1G75640 // AT3G01840 // AT5G43020 // AT2G42960 // AT5G11250 // AT3G24530 // AT2G47500 // AT1G17750 // AT5G24010 // AT2G22610 // AT1G76360 // AT5G22690 // AT4G24710 // AT1G64210 // AT1G68400 // AT5G51560 // AT2G28…
GO:0000166	F	nucleotide binding	43	989	2267	37767	0.99	1	// AT2G46760 // AT2G41890 // AT4G12720 // AT3G56100 // AT2G34810 // AT5G46330 // AT1G66090 // AT3G07960 // AT3G44630 // AT3G09910 // AT5G46450 // AT3G50930 // AT4G26510 // AT2G05940 // AT3G59350 // AT2G21450 // AT2G24130 // AT1G75640 // AT3G01840 // AT5G43020 // AT2G42960 // AT5G39320 // AT5G11250 // AT2G24610 // AT3G24530 // AT3G54770 // AT2G47500 // AT1G17750 // AT5G24010 // AT2G22610 // AT1G76…
GO:0005507	F	copper ion binding	6	989	113	37767	0.085	1	// AT4G27520 // AT4G31840 // AT1G31710 // AT5G15350 // AT4G23670 // AT5G26330
GO:0022891	F	substrate-specific transmembrane transporter activity	30	989	908	37767	0.12	1	// AT3G28860 // AT5G41800 // AT5G63850 // AT4G19690 // AT2G37925 // AT1G16370 // AT5G45105 // AT4G33020 // AT4G05120 // AT1G27770 // AT3G10290 // AT1G77380 // AT1G19770 // AT2G38060 // AT1G71880 // AT2G16850 // AT4G13420 // AT2G24610 // AT1G77690 // AT1G12500 // AT4G24570 // AT5G05820 // AT4G19030 // AT3G45060 // AT3G16240 // AT2G39450 // AT2G26900 // AT3G54820 // AT3G58060 // AT2G22500
GO:0008324	F	cation transmembrane transporter activity	12	989	503	37767	0.67	1	// AT4G13420 // AT1G27770 // AT2G39450 // AT4G19690 // AT2G37925 // AT2G38060 // AT1G16370 // AT2G26900 // AT5G45105 // AT1G71880 // AT3G58060 // AT4G33020
GO:0008289	F	lipid binding	10	989	323	37767	0.35	1	// AT2G38750 // AT3G22120 // AT5G64080 // AT4G12520 // AT2G44300 // AT3G61190 // AT1G12090 // AT3G43720 // AT3G53980 // AT5G01870
GO:0048037	F	cofactor binding	9	989	246	37767	0.21	1	// AT2G46760 // AT3G44190 // AT4G30470 // AT5G39320 // AT4G12720 // AT2G20340 // AT1G31710 // AT3G18890 // AT2G34810
GO:0016853	F	isomerase activity	8	989	265	37767	0.4	1	// AT3G01260 // AT4G30440 // AT3G23820 // AT5G66220 // AT3G15520 // AT3G25780 // AT1G78955 // AT5G48010
GO:0001883	F	purine nucleoside binding	34	989	1465	37767	0.78	1	// AT2G46760 // AT2G41890 // AT3G56100 // AT2G34810 // AT5G46330 // AT1G66090 // AT3G07960 // AT3G44630 // AT5G46450 // AT3G50930 // AT4G26510 // AT2G05940 // AT3G59350 // AT2G21450 // AT2G24130 // AT1G75640 // AT3G01840 // AT5G43020 // AT2G42960 // AT5G11250 // AT3G24530 // AT2G47500 // AT1G17750 // AT5G24010 // AT2G22610 // AT1G76360 // AT5G22690 // AT4G24710 // AT1G64210 // AT3G44190 // AT1G68…
GO:0001882	F	nucleoside binding	34	989	1465	37767	0.78	1	// AT2G46760 // AT2G41890 // AT3G56100 // AT2G34810 // AT5G46330 // AT1G66090 // AT3G07960 // AT3G44630 // AT5G46450 // AT3G50930 // AT4G26510 // AT2G05940 // AT3G59350 // AT2G21450 // AT2G24130 // AT1G75640 // AT3G01840 // AT5G43020 // AT2G42960 // AT5G11250 // AT3G24530 // AT2G47500 // AT1G17750 // AT5G24010 // AT2G22610 // AT1G76360 // AT5G22690 // AT4G24710 // AT1G64210 // AT3G44190 // AT1G68…
GO:0003735	F	structural constituent of ribosome	6	989	494	37767	0.99	1	// AT5G15220 // AT1G23410 // AT5G15760 // AT2G27535 // AT4G31460 // AT3G11120
GO:0070011	F	peptidase activity, acting on L-amino acid peptides	21	989	579	37767	0.092	1	// AT1G32970 // AT5G37540 // AT2G39710 // AT1G01300 // AT5G19100 // AT3G61820 // AT2G05920 // AT5G42240 // AT3G25700 // AT3G43960 // AT2G22970 // AT1G49630 // AT4G35350 // AT4G16563 // AT5G19110 // AT5G07030 // AT5G22860 // AT3G54400 // AT4G11320 // AT3G48350 // AT5G10770
GO:0004497	F	monooxygenase activity	6	989	127	37767	0.13	1	// AT3G61750 // AT1G62540 // AT1G01600 // AT3G50660 // AT4G19230 // AT1G12140
GO:0016746	F	transferase activity, transferring acyl groups	5	989	324	37767	0.92	1	// AT4G01950 // AT2G15090 // AT1G75880 // AT1G02390 // AT1G25450
GO:0016747	F	transferase activity, transferring acyl groups other than amino-acyl groups	5	989	290	37767	0.87	1	// AT4G01950 // AT2G15090 // AT1G75880 // AT1G02390 // AT1G25450
GO:0046914	F	transition metal ion binding	47	989	1618	37767	0.26	1	// AT5G05340 // AT4G27520 // AT1G61840 // AT3G06990 // AT3G10080 // AT4G24015 // AT5G45100 // AT1G44970 // AT4G16141 // AT1G49200 // AT5G11620 // AT5G24930 // AT3G15680 // AT2G04500 // AT1G08080 // AT5G41400 // AT4G15975 // AT1G30870 // AT1G14550 // AT2G34060 // AT3G07000 // AT4G23670 // AT4G02540 // AT1G64710 // AT5G01600 // AT4G39070 // AT5G15350 // AT4G30170 // AT4G17680 // AT1G31710 // AT1G49…
GO:0022890	F	inorganic cation transmembrane transporter activity	5	989	228	37767	0.71	1	// AT1G27770 // AT2G37925 // AT2G39450 // AT4G19690 // AT4G13420
GO:0015267	F	channel activity	6	989	152	37767	0.22	1	// AT2G16850 // AT2G24610 // AT1G27770 // AT3G54820 // AT3G16240 // AT4G19030
GO:0016791	F	phosphatase activity	9	989	407	37767	0.74	1	// AT4G39770 // AT5G24780 // AT5G24770 // AT4G33920 // AT2G01880 // AT5G63140 // AT5G10100 // AT2G30020 // AT4G18010
GO:0005516	F	calmodulin binding	9	989	231	37767	0.16	1	// AT2G43040 // AT5G57010 // AT2G38540 // AT2G24610 // AT1G27770 // AT3G13600 // AT4G23060 // AT2G02000 // AT3G59220
GO:0005515	F	protein binding	72	989	2944	37767	0.74	1	// AT3G05470 // AT5G41400 // AT2G26380 // AT5G65310 // AT4G12720 // AT3G56100 // AT2G02000 // AT4G20940 // AT2G05920 // AT5G46330 // AT3G06778 // AT2G29890 // AT3G44630 // AT5G45100 // AT5G57010 // AT5G51600 // AT5G46450 // AT3G45640 // AT1G49200 // AT5G11620 // AT1G78230 // AT5G27000 // AT1G68060 // AT1G76790 // AT4G18510 // AT1G76540 // AT5G24780 // AT2G04500 // AT2G21510 // AT1G27770 // AT2G19…
GO:0016887	F	ATPase activity	9	989	482	37767	0.88	1	// AT3G28860 // AT4G24710 // AT1G27770 // AT3G24530 // AT1G17840 // AT3G28345 // AT3G50930 // AT1G51500 // AT5G27000
GO:0004674	F	protein serine/threonine kinase activity	22	989	681	37767	0.19	1	// AT3G56100 // AT5G46330 // AT3G60550 // AT3G45640 // AT2G05940 // AT3G59350 // AT2G24130 // AT1G76540 // AT1G75640 // AT5G43020 // AT2G45080 // AT2G42960 // AT1G17750 // AT5G24010 // AT3G54710 // AT1G76360 // AT5G38280 // AT1G64210 // AT1G68400 // AT5G51560 // AT4G37630 // AT1G56720
GO:0004672	F	protein kinase activity	26	989	953	37767	0.45	1	// AT2G41890 // AT3G56100 // AT5G46330 // AT3G60550 // AT3G45640 // AT2G05940 // AT3G59350 // AT2G24130 // AT1G76540 // AT1G75640 // AT3G01840 // AT5G43020 // AT2G45080 // AT2G42960 // AT1G17750 // AT5G24010 // AT5G54380 // AT3G54710 // AT1G76360 // AT5G40540 // AT5G38280 // AT1G64210 // AT1G68400 // AT5G51560 // AT4G37630 // AT1G56720
GO:0017111	F	nucleoside-triphosphatase activity	19	989	792	37767	0.68	1	// AT1G76720 // AT3G28860 // AT4G24710 // AT3G50240 // AT3G28345 // AT2G47500 // AT1G27770 // AT1G18370 // AT3G24530 // AT2G28620 // AT1G66090 // AT1G17840 // AT3G44630 // AT5G46450 // AT2G22610 // AT3G50930 // AT1G51500 // AT2G21450 // AT5G27000
GO:0008509	F	anion transmembrane transporter activity	6	989	120	37767	0.1	1	// AT2G38060 // AT3G10290 // AT1G12500 // AT5G05820 // AT4G19030 // AT3G45060
GO:0046873	F	metal ion transmembrane transporter activity	6	989	168	37767	0.29	1	// AT4G13420 // AT1G27770 // AT2G39450 // AT4G19690 // AT2G37925 // AT4G33020
GO:0046872	F	metal ion binding	56	989	1997	37767	0.32	1	// AT2G38750 // AT5G05340 // AT4G27520 // AT1G61840 // AT3G06990 // AT3G10080 // AT4G24015 // AT5G45100 // AT1G44970 // AT4G16141 // AT1G49200 // AT5G11620 // AT5G24930 // AT3G15680 // AT2G04500 // AT1G08080 // AT5G50740 // AT5G41400 // AT4G15975 // AT1G30870 // AT1G14550 // AT5G37770 // AT2G34060 // AT1G76640 // AT4G23670 // AT2G34020 // AT4G02540 // AT1G64710 // AT5G01600 // AT4G39070 // AT5G15…
GO:0005524	F	ATP binding	31	989	1377	37767	0.82	1	// AT4G26510 // AT2G41890 // AT3G56100 // AT5G46330 // AT1G66090 // AT3G07960 // AT3G44630 // AT5G46450 // AT3G50930 // AT2G05940 // AT3G59350 // AT2G21450 // AT2G24130 // AT1G75640 // AT3G01840 // AT5G43020 // AT2G42960 // AT5G11250 // AT3G24530 // AT2G47500 // AT1G17750 // AT5G24010 // AT2G22610 // AT1G76360 // AT5G22690 // AT4G24710 // AT1G64210 // AT1G68400 // AT5G51560 // AT2G28620 // AT1G56…
GO:0015405	F	P-P-bond-hydrolysis-driven transmembrane transporter activity	5	989	243	37767	0.76	1	// AT1G17840 // AT1G27770 // AT3G28860 // AT1G51500 // AT3G28345
GO:0016881	F	acid-amino acid ligase activity	7	989	364	37767	0.84	1	// AT3G61590 // AT1G23030 // AT4G36410 // AT1G24330 // AT2G35930 // AT1G10560 // AT5G65920
GO:0003676	F	nucleic acid binding	91	989	4842	37767	1	1	// AT5G49520 // AT3G50060 // AT3G24310 // AT5G64530 // AT1G80840 // AT3G22830 // AT5G43650 // AT3G26744 // AT1G12610 // AT5G50250 // AT1G74500 // AT4G37780 // AT5G23280 // AT5G65590 // AT3G54770 // AT5G21960 // AT4G25470 // AT1G21910 // AT5G25160 // AT1G80730 // AT3G15540 // AT2G22850 // AT2G46510 // AT4G34990 // AT5G51790 // AT5G43270 // AT5G24930 // AT4G37260 // AT5G62470 // AT1G03300 // AT1G67…
GO:0003677	F	DNA binding	81	989	2892	37767	0.28	1	// AT5G49520 // AT3G50060 // AT4G38620 // AT3G24310 // AT5G65310 // AT1G63030 // AT1G32640 // AT3G16350 // AT3G24520 // AT3G26744 // AT5G18560 // AT5G28300 // AT4G16750 // AT2G44840 // AT2G23290 // AT5G64530 // AT4G17460 // AT1G67590 // AT1G80840 // AT2G45820 // AT3G22830 // AT5G43650 // AT2G21450 // AT4G39070 // AT1G44830 // AT3G55980 // AT2G46510 // AT4G32800 // AT3G54810 // AT2G02820 // AT5G51…
GO:0042626	F	ATPase activity, coupled to transmembrane movement of substances	5	989	181	37767	0.52	1	// AT1G17840 // AT1G27770 // AT3G28860 // AT1G51500 // AT3G28345
GO:0042623	F	ATPase activity, coupled	5	989	359	37767	0.96	1	// AT1G17840 // AT1G27770 // AT3G28860 // AT1G51500 // AT3G28345
GO:0016301	F	kinase activity	46	989	1641	37767	0.34	1	// AT1G05100 // AT2G41890 // AT3G56100 // AT1G12040 // AT5G46330 // AT4G26510 // AT3G07960 // AT3G60550 // AT3G44610 // AT2G05940 // AT3G59350 // AT5G03640 // AT2G24130 // AT1G76540 // AT5G60890 // AT1G75640 // AT1G66430 // AT3G01840 // AT1G78940 // AT5G43020 // AT2G45080 // AT5G25930 // AT2G42960 // AT1G51940 // AT4G26890 // AT1G17750 // AT5G24010 // AT3G45640 // AT5G54380 // AT3G54710 // AT1G76…
GO:0042578	F	phosphoric ester hydrolase activity	10	989	481	37767	0.81	1	// AT4G39770 // AT5G24780 // AT5G24770 // AT4G33920 // AT2G01880 // AT5G63140 // AT5G10100 // AT2G30020 // AT5G41080 // AT4G18010
GO:0008233	F	peptidase activity	21	989	646	37767	0.19	1	// AT1G32970 // AT5G37540 // AT2G39710 // AT1G01300 // AT5G19100 // AT3G61820 // AT2G05920 // AT5G42240 // AT3G25700 // AT3G43960 // AT2G22970 // AT1G49630 // AT4G35350 // AT4G16563 // AT5G19110 // AT5G07030 // AT5G22860 // AT3G54400 // AT4G11320 // AT3G48350 // AT5G10770
GO:0008236	F	serine-type peptidase activity	5	989	186	37767	0.54	1	// AT1G32970 // AT5G22860 // AT2G05920 // AT5G42240 // AT2G22970
GO:0043169	F	cation binding	61	989	2087	37767	0.21	1	// AT2G38750 // AT5G05340 // AT4G27520 // AT1G64760 // AT3G06990 // AT3G10080 // AT4G24015 // AT5G45100 // AT1G44970 // AT4G16141 // AT4G15975 // AT1G49200 // AT5G11620 // AT5G24930 // AT3G15680 // AT2G04500 // AT1G08080 // AT5G50740 // AT5G41400 // AT5G58480 // AT1G30870 // AT1G14550 // AT5G37770 // AT2G34060 // AT1G76640 // AT4G23670 // AT2G34020 // AT4G02540 // AT1G64710 // AT5G01600 // AT4G39…
GO:0043167	F	ion binding	61	989	2087	37767	0.21	1	// AT2G38750 // AT5G05340 // AT4G27520 // AT1G64760 // AT3G06990 // AT3G10080 // AT4G24015 // AT5G45100 // AT1G44970 // AT4G16141 // AT4G15975 // AT1G49200 // AT5G11620 // AT5G24930 // AT3G15680 // AT2G04500 // AT1G08080 // AT5G50740 // AT5G41400 // AT5G58480 // AT1G30870 // AT1G14550 // AT5G37770 // AT2G34060 // AT1G76640 // AT4G23670 // AT2G34020 // AT4G02540 // AT1G64710 // AT5G01600 // AT4G39…
GO:0030554	F	adenyl nucleotide binding	34	989	1465	37767	0.78	1	// AT2G46760 // AT2G41890 // AT3G56100 // AT2G34810 // AT5G46330 // AT1G66090 // AT3G07960 // AT3G44630 // AT5G46450 // AT3G50930 // AT4G26510 // AT2G05940 // AT3G59350 // AT2G21450 // AT2G24130 // AT1G75640 // AT3G01840 // AT5G43020 // AT2G42960 // AT5G11250 // AT3G24530 // AT2G47500 // AT1G17750 // AT5G24010 // AT2G22610 // AT1G76360 // AT5G22690 // AT4G24710 // AT1G64210 // AT3G44190 // AT1G68…
GO:0022838	F	substrate-specific channel activity	6	989	151	37767	0.21	1	// AT2G16850 // AT2G24610 // AT1G27770 // AT3G54820 // AT3G16240 // AT4G19030
GO:0016836	F	hydro-lyase activity	5	989	97	37767	0.12	1	// AT2G28210 // AT1G08080 // AT3G44320 // AT1G11790 // AT5G42650
GO:0015075	F	ion transmembrane transporter activity	18	989	655	37767	0.45	1	// AT4G19690 // AT4G13420 // AT2G24610 // AT1G27770 // AT5G45105 // AT2G39450 // AT2G38060 // AT3G10290 // AT2G37925 // AT1G12500 // AT1G16370 // AT2G26900 // AT5G05820 // AT1G71880 // AT3G58060 // AT4G33020 // AT4G19030 // AT3G45060
GO:0016879	F	ligase activity, forming carbon-nitrogen bonds	8	989	423	37767	0.86	1	// AT3G61590 // AT1G23030 // AT3G25660 // AT1G24330 // AT2G35930 // AT1G10560 // AT4G36410 // AT5G65920
GO:0016874	F	ligase activity	10	989	564	37767	0.92	1	// AT3G61590 // AT1G23030 // AT3G25660 // AT1G24330 // AT2G35930 // AT1G10560 // AT4G36410 // AT5G65920 // AT1G20510 // AT3G07420
GO:0004888	F	transmembrane receptor activity	8	989	171	37767	0.089	1	// AT5G11250 // AT5G46330 // AT1G66090 // AT3G44630 // AT5G46450 // AT5G22690 // AT2G20142 // AT5G38280
GO:0008270	F	zinc ion binding	28	989	1299	37767	0.87	1	// AT3G06990 // AT4G24015 // AT5G45100 // AT1G49200 // AT5G11620 // AT3G15680 // AT2G04500 // AT1G08080 // AT5G41400 // AT4G15975 // AT3G07000 // AT4G02540 // AT1G64710 // AT4G39070 // AT1G61840 // AT4G17680 // AT1G49230 // AT2G23100 // AT2G28210 // AT4G02200 // AT5G52010 // AT5G25160 // AT1G80730 // AT4G16141 // AT5G39471 // AT1G76410 // AT4G01730 // AT5G24930
GO:0016614	F	oxidoreductase activity, acting on CH-OH group of donors	5	989	188	37767	0.55	1	// AT2G46760 // AT1G04420 // AT2G45400 // AT5G39320 // AT5G14700
GO:0016765	F	transferase activity, transferring alkyl or aryl (other than methyl) groups	5	989	158	37767	0.4	1	// AT2G36880 // AT3G17390 // AT2G29440 // AT1G17190 // AT3G63110
GO:0022803	F	passive transmembrane transporter activity	6	989	152	37767	0.22	1	// AT2G16850 // AT2G24610 // AT1G27770 // AT3G54820 // AT3G16240 // AT4G19030
GO:0022804	F	active transmembrane transporter activity	20	989	664	37767	0.3	1	// AT3G28860 // AT1G51500 // AT3G28345 // AT5G63850 // AT5G41800 // AT1G27770 // AT1G61890 // AT4G13420 // AT2G39450 // AT5G17700 // AT1G17840 // AT1G11670 // AT2G38060 // AT1G16370 // AT2G26900 // AT1G77380 // AT1G71880 // AT3G16240 // AT4G29140 // AT1G77690
GO:0019787	F	small conjugating protein ligase activity	7	989	336	37767	0.77	1	// AT3G61590 // AT1G23030 // AT4G36410 // AT1G24330 // AT2G35930 // AT1G10560 // AT5G65920
GO:0043492	F	ATPase activity, coupled to movement of substances	5	989	181	37767	0.52	1	// AT1G17840 // AT1G27770 // AT3G28860 // AT1G51500 // AT3G28345
GO:0016462	F	pyrophosphatase activity	21	989	832	37767	0.6	1	// AT1G76720 // AT3G28860 // AT4G24710 // AT3G50240 // AT3G28345 // AT2G47500 // AT4G12720 // AT1G27770 // AT1G68760 // AT3G24530 // AT2G28620 // AT1G66090 // AT1G17840 // AT3G44630 // AT5G46450 // AT2G22610 // AT3G50930 // AT1G18370 // AT1G51500 // AT2G21450 // AT5G27000
GO:0016820	F	hydrolase activity, acting on acid anhydrides, catalyzing transmembrane movement of substances	5	989	183	37767	0.53	1	// AT1G17840 // AT1G27770 // AT3G28860 // AT1G51500 // AT3G28345
GO:0015297	F	antiporter activity	5	989	170	37767	0.46	1	// AT1G11670 // AT2G39450 // AT4G29140 // AT1G61890 // AT5G17700
GO:0015291	F	secondary active transmembrane transporter activity	10	989	345	37767	0.42	1	// AT1G61890 // AT4G13420 // AT2G39450 // AT5G17700 // AT1G11670 // AT2G38060 // AT1G16370 // AT2G26900 // AT1G71880 // AT4G29140
GO:0015293	F	symporter activity	5	989	164	37767	0.43	1	// AT1G71880 // AT2G38060 // AT1G16370 // AT2G26900 // AT4G13420
GO:0003723	F	RNA binding	7	989	1379	37767	1	1	// AT5G66570 // AT5G52070 // AT3G54770 // AT2G46780 // AT1G78260 // AT5G50250 // AT1G03300
GO:0004872	F	receptor activity	9	989	212	37767	0.11	1	// AT5G11250 // AT5G46330 // AT4G30850 // AT1G66090 // AT3G44630 // AT5G46450 // AT5G22690 // AT2G20142 // AT5G38280
GO:0050662	F	coenzyme binding	7	989	191	37767	0.24	1	// AT2G46760 // AT3G44190 // AT4G30470 // AT5G39320 // AT4G12720 // AT3G18890 // AT2G34810
GO:0005198	F	structural molecule activity	16	989	659	37767	0.65	1	// AT5G15220 // AT1G75780 // AT1G23410 // AT3G12110 // AT1G12040 // AT1G26770 // AT3G28550 // AT5G15760 // AT3G23400 // AT4G13340 // AT2G27535 // AT5G35190 // AT1G20010 // AT4G31460 // AT1G76930 // AT3G11120
GO:0005856	C	cytoskeleton	9	989	192	37767	0.074	1	// AT1G68060 // AT3G12110 // AT5G51600 // AT2G28620 // AT2G29890 // AT2G47500 // AT3G60840 // AT2G22610 // AT1G20010
GO:0044424	C	intracellular part	225	989	9302	37767	0.92	1	// AT1G58290 // AT1G29930 // AT1G80840 // AT4G30860 // AT5G20260 // AT2G29890 // AT1G55205 // AT2G27535 // AT1G04430 // AT5G43650 // AT1G68230 // AT1G76790 // AT1G23030 // AT1G05800 // AT3G26744 // AT3G12110 // AT1G75100 // AT4G25480 // AT2G38060 // AT1G19050 // AT1G74500 // AT5G17920 // AT1G19180 // AT3G09260 // AT4G21850 // AT1G76220 // AT1G72450 // AT5G39320 // AT1G25450 // AT5G65590 // AT5G11…
GO:0044422	C	organelle part	47	989	2562	37767	1	1	// AT3G47860 // AT1G31330 // AT4G04640 // AT2G28620 // AT3G23400 // AT1G09390 // AT5G51600 // AT4G12800 // AT4G08390 // AT1G68060 // AT5G66570 // AT5G42650 // AT1G27770 // AT4G03280 // AT1G66430 // AT1G55670 // AT3G16240 // AT2G26900 // AT1G74470 // AT4G01540 // AT3G59550 // AT3G15520 // AT2G47500 // AT3G18890 // AT4G17090 // AT4G20130 // AT5G16910 // AT2G22610 // AT4G24570 // AT3G49720 // AT1G04…
GO:0009941	C	chloroplast envelope	9	989	265	37767	0.27	1	// AT1G13930 // AT2G26900 // AT5G16010 // AT1G27770 // AT3G18890 // AT5G02940 // AT1G74470 // AT2G46820 // AT1G04420
GO:0009526	C	plastid envelope	9	989	331	37767	0.5	1	// AT1G13930 // AT2G26900 // AT5G16010 // AT1G27770 // AT3G18890 // AT5G02940 // AT1G74470 // AT2G46820 // AT1G04420
GO:0031976	C	plastid thylakoid	11	989	293	37767	0.16	1	// AT1G55670 // AT4G04640 // AT3G49720 // AT3G15520 // AT1G20340 // AT4G03280 // AT3G18890 // AT3G23400 // AT1G74470 // AT2G46820 // AT5G66570
GO:0005622	C	intracellular	232	989	9671	37767	0.94	1	// AT1G58290 // AT1G29930 // AT1G80840 // AT4G30860 // AT5G20260 // AT2G29890 // AT1G76540 // AT1G68360 // AT2G27535 // AT1G04430 // AT5G43650 // AT1G68230 // AT1G76790 // AT1G23030 // AT1G05800 // AT3G26744 // AT3G53130 // AT3G12110 // AT1G75100 // AT4G25480 // AT2G38060 // AT1G19050 // AT1G74500 // AT5G17920 // AT1G19180 // AT3G09260 // AT4G21850 // AT1G76220 // AT1G72450 // AT5G39320 // AT1G25…
GO:0005737	C	cytoplasm	169	989	6822	37767	0.8	1	// AT1G58290 // AT5G20260 // AT1G55205 // AT2G27535 // AT1G04430 // AT1G68230 // AT1G76790 // AT1G05800 // AT3G12110 // AT1G75100 // AT2G38060 // AT5G17920 // AT1G64210 // AT4G21850 // AT1G76220 // AT5G15220 // AT5G39320 // AT1G25450 // AT5G65590 // AT5G11650 // AT5G43780 // AT5G05350 // AT3G18890 // AT4G23670 // AT1G20510 // AT3G57010 // AT1G04420 // AT4G31820 // AT3G54400 // AT1G21910 // AT1G20…
GO:0070013	C	intracellular organelle lumen	6	989	539	37767	0.99	1	// AT3G47860 // AT5G66570 // AT1G20340 // AT3G23400 // AT3G59550 // AT3G15520
GO:0016021	C	integral to membrane	8	989	395	37767	0.81	1	// AT4G30650 // AT1G75000 // AT2G46890 // AT3G15350 // AT5G16910 // AT1G10550 // AT4G25010 // AT2G03240
GO:0043234	C	protein complex	28	989	1443	37767	0.96	1	// AT1G29930 // AT4G12800 // AT1G31330 // AT4G04640 // AT3G61470 // AT4G33260 // AT5G51600 // AT2G30020 // AT1G68060 // AT1G23030 // AT5G66570 // AT4G03280 // AT1G55670 // AT5G59730 // AT2G33560 // AT3G27690 // AT3G59550 // AT2G47500 // AT4G33270 // AT2G22610 // AT1G76540 // AT4G33920 // AT2G28620 // AT1G61520 // AT5G65920 // AT2G46820 // AT1G20010 // AT5G23730
GO:0043231	C	intracellular membrane-bounded organelle	184	989	7615	37767	0.89	1	// AT1G58290 // AT1G80840 // AT4G30860 // AT5G20260 // AT1G55205 // AT1G04430 // AT5G43650 // AT1G68230 // AT1G05800 // AT3G26744 // AT3G53130 // AT1G20310 // AT4G25480 // AT2G38060 // AT1G19050 // AT1G74500 // AT1G49840 // AT1G19180 // AT3G09260 // AT1G76220 // AT1G72450 // AT5G39320 // AT1G25450 // AT5G65590 // AT5G11650 // AT5G43780 // AT5G05350 // AT3G18890 // AT5G21960 // AT4G23670 // AT1G20…
GO:0043232	C	intracellular non-membrane-bounded organelle	20	989	1040	37767	0.94	1	// AT1G68060 // AT5G15220 // AT1G23410 // AT2G33560 // AT2G47500 // AT3G12110 // AT3G59550 // AT5G51600 // AT2G28620 // AT2G29890 // AT5G24314 // AT5G15760 // AT2G27535 // AT4G20130 // AT3G60840 // AT2G22610 // AT2G46820 // AT1G20010 // AT4G31460 // AT3G11120
GO:0005829	C	cytosol	17	989	912	37767	0.94	1	// AT1G76790 // AT2G35930 // AT1G23410 // AT5G39320 // AT1G07890 // AT4G12720 // AT1G68760 // AT1G77520 // AT4G13930 // AT3G18240 // AT2G27535 // AT4G21850 // AT3G03780 // AT1G69040 // AT5G17920 // AT4G28190 // AT3G11120
GO:0009570	C	chloroplast stroma	8	989	249	37767	0.33	1	// AT1G13930 // AT3G25660 // AT4G17090 // AT1G09390 // AT1G66430 // AT1G04420 // AT1G60950 // AT4G08390
GO:0044430	C	cytoskeletal part	7	989	160	37767	0.14	1	// AT1G68060 // AT2G28620 // AT3G60840 // AT2G47500 // AT5G51600 // AT2G22610 // AT1G20010
GO:0044436	C	thylakoid part	12	989	307	37767	0.12	1	// AT1G55670 // AT4G04640 // AT3G49720 // AT3G47860 // AT3G15520 // AT1G20340 // AT4G03280 // AT3G18890 // AT3G23400 // AT1G74470 // AT2G46820 // AT5G66570
GO:0044435	C	plastid part	29	989	867	37767	0.12	1	// AT1G31330 // AT4G04640 // AT3G23400 // AT1G09390 // AT4G12800 // AT4G08390 // AT5G66570 // AT5G42650 // AT1G27770 // AT4G03280 // AT1G66430 // AT1G55670 // AT2G26900 // AT2G46820 // AT3G18890 // AT4G17090 // AT4G20130 // AT3G49720 // AT1G04420 // AT1G13930 // AT5G16010 // AT3G25660 // AT1G20340 // AT5G24314 // AT1G61520 // AT5G02940 // AT1G74470 // AT3G15520 // AT1G60950
GO:0031090	C	organelle membrane	16	989	842	37767	0.92	1	// AT1G55670 // AT4G04640 // AT5G66570 // AT3G15520 // AT4G01540 // AT1G27770 // AT2G46820 // AT4G03280 // AT3G18890 // AT3G23400 // AT5G16910 // AT1G74470 // AT4G24570 // AT3G49720 // AT3G16240 // AT2G22500
GO:0042651	C	thylakoid membrane	10	989	244	37767	0.12	1	// AT1G55670 // AT4G04640 // AT3G49720 // AT3G15520 // AT4G03280 // AT3G18890 // AT3G23400 // AT1G74470 // AT2G46820 // AT5G66570
GO:0009535	C	chloroplast thylakoid membrane	10	989	231	37767	0.091	1	// AT1G55670 // AT4G04640 // AT3G49720 // AT3G15520 // AT4G03280 // AT3G18890 // AT3G23400 // AT1G74470 // AT2G46820 // AT5G66570
GO:0009534	C	chloroplast thylakoid	11	989	290	37767	0.15	1	// AT1G55670 // AT4G04640 // AT3G49720 // AT3G15520 // AT1G20340 // AT4G03280 // AT3G18890 // AT3G23400 // AT1G74470 // AT2G46820 // AT5G66570
GO:0009532	C	plastid stroma	11	989	322	37767	0.23	1	// AT1G13930 // AT4G20130 // AT3G25660 // AT5G24314 // AT4G17090 // AT1G09390 // AT1G66430 // AT2G46820 // AT1G04420 // AT1G60950 // AT4G08390
GO:0005783	C	endoplasmic reticulum	12	989	466	37767	0.56	1	// AT5G47990 // AT4G37410 // AT1G25450 // AT4G01540 // AT1G27770 // AT5G42100 // AT4G36250 // AT3G50660 // AT2G15090 // AT2G29980 // AT3G57010 // AT1G68230
GO:0031977	C	thylakoid lumen	5	989	95	37767	0.11	1	// AT3G47860 // AT3G23400 // AT5G66570 // AT1G20340 // AT3G15520
GO:0031974	C	membrane-enclosed lumen	6	989	546	37767	1	1	// AT3G47860 // AT5G66570 // AT1G20340 // AT3G23400 // AT3G59550 // AT3G15520
GO:0031975	C	envelope	12	989	595	37767	0.85	1	// AT1G13930 // AT1G74470 // AT4G01540 // AT5G16010 // AT1G27770 // AT2G46820 // AT3G18890 // AT5G02940 // AT2G26900 // AT4G24570 // AT1G04420 // AT2G22500
GO:0005773	C	vacuole	14	989	383	37767	0.14	1	// AT3G07470 // AT4G27520 // AT5G64870 // AT1G27100 // AT2G06925 // AT2G42570 // AT3G62570 // AT3G14220 // AT3G22060 // AT4G23670 // AT3G16240 // AT1G78230 // AT5G15350 // AT4G35350
GO:0043229	C	intracellular organelle	197	989	8149	37767	0.9	1	// AT1G58290 // AT1G80840 // AT4G30860 // AT5G20260 // AT2G29890 // AT1G55205 // AT2G27535 // AT1G04430 // AT5G43650 // AT1G68230 // AT1G05800 // AT3G26744 // AT3G53130 // AT1G20310 // AT4G25480 // AT2G38060 // AT1G19050 // AT1G74500 // AT1G49840 // AT1G19180 // AT3G09260 // AT1G76220 // AT1G72450 // AT5G39320 // AT1G25450 // AT5G65590 // AT5G11650 // AT5G43780 // AT5G05350 // AT3G18890 // AT5G21…
GO:0043228	C	non-membrane-bounded organelle	20	989	1040	37767	0.94	1	// AT1G68060 // AT5G15220 // AT1G23410 // AT2G33560 // AT2G47500 // AT3G12110 // AT3G59550 // AT5G51600 // AT2G28620 // AT2G29890 // AT5G24314 // AT5G15760 // AT2G27535 // AT4G20130 // AT3G60840 // AT2G22610 // AT2G46820 // AT1G20010 // AT4G31460 // AT3G11120
GO:0043227	C	membrane-bounded organelle	184	989	7622	37767	0.9	1	// AT1G58290 // AT1G80840 // AT4G30860 // AT5G20260 // AT1G55205 // AT1G04430 // AT5G43650 // AT1G68230 // AT1G05800 // AT3G26744 // AT3G53130 // AT1G20310 // AT4G25480 // AT2G38060 // AT1G19050 // AT1G74500 // AT1G49840 // AT1G19180 // AT3G09260 // AT1G76220 // AT1G72450 // AT5G39320 // AT1G25450 // AT5G65590 // AT5G11650 // AT5G43780 // AT5G05350 // AT3G18890 // AT5G21960 // AT4G23670 // AT1G20…
GO:0043226	C	organelle	197	989	8155	37767	0.9	1	// AT1G58290 // AT1G80840 // AT4G30860 // AT5G20260 // AT2G29890 // AT1G55205 // AT2G27535 // AT1G04430 // AT5G43650 // AT1G68230 // AT1G05800 // AT3G26744 // AT3G53130 // AT1G20310 // AT4G25480 // AT2G38060 // AT1G19050 // AT1G74500 // AT1G49840 // AT1G19180 // AT3G09260 // AT1G76220 // AT1G72450 // AT5G39320 // AT1G25450 // AT5G65590 // AT5G11650 // AT5G43780 // AT5G05350 // AT3G18890 // AT5G21…
GO:0044446	C	intracellular organelle part	47	989	2561	37767	1	1	// AT3G47860 // AT1G31330 // AT4G04640 // AT2G28620 // AT3G23400 // AT1G09390 // AT5G51600 // AT4G12800 // AT4G08390 // AT1G68060 // AT5G66570 // AT5G42650 // AT1G27770 // AT4G03280 // AT1G66430 // AT1G55670 // AT3G16240 // AT2G26900 // AT1G74470 // AT4G01540 // AT3G59550 // AT3G15520 // AT2G47500 // AT3G18890 // AT4G17090 // AT4G20130 // AT5G16910 // AT2G22610 // AT4G24570 // AT3G49720 // AT1G04…
GO:0044444	C	cytoplasmic part	157	989	6289	37767	0.75	1	// AT1G58290 // AT5G20260 // AT1G55205 // AT2G27535 // AT1G04430 // AT1G68230 // AT1G76790 // AT1G05800 // AT3G12110 // AT1G20310 // AT2G38060 // AT1G49840 // AT1G64210 // AT4G21850 // AT5G15220 // AT5G39320 // AT1G25450 // AT5G11250 // AT5G11650 // AT5G43780 // AT5G05350 // AT3G18890 // AT4G23670 // AT1G20510 // AT3G57010 // AT1G04420 // AT4G31820 // AT3G54400 // AT1G21910 // AT1G76220 // AT4G37…
GO:0005634	C	nucleus	55	989	2621	37767	0.96	1	// AT1G80840 // AT5G65310 // AT4G30860 // AT4G17460 // AT1G33760 // AT5G18560 // AT3G23400 // AT4G16750 // AT2G44840 // AT3G63110 // AT1G67590 // AT2G22760 // AT5G51990 // AT3G44260 // AT1G44830 // AT2G28550 // AT4G32800 // AT1G62975 // AT5G43650 // AT4G34410 // AT4G25480 // AT4G27410 // AT3G48100 // AT1G19050 // AT1G74500 // AT3G05140 // AT1G19180 // AT4G28190 // AT3G18240 // AT5G53290 // AT1G72…
GO:0005739	C	mitochondrion	20	989	1276	37767	1	1	// AT5G26030 // AT2G28780 // AT4G22860 // AT4G25100 // AT2G17650 // AT3G54020 // AT5G67245 // AT4G33920 // AT3G12110 // AT1G09575 // AT3G07420 // AT3G11350 // AT3G50930 // AT1G49630 // AT5G43780 // AT4G24570 // AT5G42650 // AT4G08390 // AT2G22500 // AT1G64210
GO:0030529	C	ribonucleoprotein complex	6	989	703	37767	1	1	// AT5G15220 // AT1G23410 // AT5G15760 // AT2G27535 // AT4G31460 // AT3G11120
GO:0031984	C	organelle subcompartment	11	989	295	37767	0.16	1	// AT1G55670 // AT4G04640 // AT3G49720 // AT3G15520 // AT1G20340 // AT4G03280 // AT3G18890 // AT3G23400 // AT1G74470 // AT2G46820 // AT5G66570
GO:0032991	C	macromolecular complex	34	989	2180	37767	1	1	// AT1G29930 // AT4G12800 // AT1G31330 // AT4G04640 // AT5G15760 // AT2G27535 // AT3G61470 // AT4G33260 // AT5G51600 // AT2G30020 // AT1G68060 // AT1G23030 // AT5G66570 // AT4G03280 // AT1G55670 // AT5G59730 // AT5G15220 // AT2G33560 // AT3G27690 // AT3G59550 // AT2G47500 // AT4G33270 // AT2G22610 // AT1G76540 // AT3G11120 // AT1G23410 // AT4G33920 // AT2G28620 // AT1G61520 // AT5G65920 // AT2G46…
GO:0005794	C	Golgi apparatus	6	989	293	37767	0.78	1	// AT3G49720 // AT4G18030 // AT2G34300 // AT2G39450 // AT5G16910 // AT1G04430
GO:0031967	C	organelle envelope	12	989	595	37767	0.85	1	// AT1G13930 // AT1G74470 // AT4G01540 // AT5G16010 // AT1G27770 // AT2G46820 // AT3G18890 // AT5G02940 // AT2G26900 // AT4G24570 // AT1G04420 // AT2G22500
GO:0005694	C	chromosome	5	989	177	37767	0.5	1	// AT5G24314 // AT4G20130 // AT3G59550 // AT2G33560 // AT2G46820
GO:0043233	C	organelle lumen	6	989	539	37767	0.99	1	// AT3G47860 // AT5G66570 // AT1G20340 // AT3G23400 // AT3G59550 // AT3G15520
GO:0015630	C	microtubule cytoskeleton	6	989	117	37767	0.096	1	// AT1G68060 // AT2G28620 // AT2G47500 // AT5G51600 // AT2G22610 // AT3G60840
GO:0005840	C	ribosome	6	989	524	37767	0.99	1	// AT5G15220 // AT1G23410 // AT5G15760 // AT2G27535 // AT4G31460 // AT3G11120
GO:0055035	C	plastid thylakoid membrane	10	989	231	37767	0.091	1	// AT1G55670 // AT4G04640 // AT3G49720 // AT3G15520 // AT4G03280 // AT3G18890 // AT3G23400 // AT1G74470 // AT2G46820 // AT5G66570

## Sheet: up18vsWT
GO terms derived from genes significantly induced in med18 versus Col-0
GO_acc	term_type	Term	queryitem	querytotal	bgitem	bgtotal	pvalue	FDR	entries
GO:0030528	F	transcription regulator activity	62	537	2417	37767	7.8e-06	0.0011	// AT5G14000 // AT3G09230 // AT3G22100 // AT3G61630 // AT1G63210 // AT2G13960 // AT2G24700 // AT1G43640 // AT1G47655 // AT3G24500 // AT3G60490 // AT3G46080 // AT3G23240 // AT1G67710 // AT1G52880 // AT5G38740 // AT5G39810 // AT2G40740 // AT1G02230 // AT2G21900 // AT2G24680 // AT5G01200 // AT1G77570 // AT1G29860 // AT5G10140 // AT5G65100 // AT2G28700 // AT2G40340 // AT1G72350 // AT1G17950 // AT1G70…
GO:0015116	F	sulfate transmembrane transporter activity	5	537	15	37767	6.9e-06	0.0011	// AT5G19600 // AT1G77990 // AT4G08620 // AT1G22150 // AT1G78000
GO:0003700	F	transcription factor activity	58	537	2173	37767	5e-06	0.0011	// AT5G14000 // AT3G09230 // AT3G22100 // AT3G61630 // AT2G13960 // AT2G24700 // AT1G43640 // AT1G47655 // AT3G24500 // AT3G60490 // AT3G46080 // AT3G23240 // AT1G67710 // AT1G52880 // AT5G38740 // AT5G39810 // AT2G40740 // AT1G02230 // AT2G21900 // AT2G24680 // AT5G01200 // AT1G77570 // AT1G29860 // AT5G10140 // AT5G65100 // AT2G28700 // AT2G40340 // AT1G72350 // AT1G17950 // AT1G70510 // AT1G31…
GO:0003677	F	DNA binding	65	537	2892	37767	0.00022	0.019	// AT5G14000 // AT1G13370 // AT3G22100 // AT3G61630 // AT2G13960 // AT3G09230 // AT2G24700 // AT1G43640 // AT1G47655 // AT3G24500 // AT2G18050 // AT3G60490 // AT3G46080 // AT3G23240 // AT1G67710 // AT1G66730 // AT5G59690 // AT5G38740 // AT5G39810 // AT2G40740 // AT1G02230 // AT2G21900 // AT1G77570 // AT2G24680 // AT2G28720 // AT5G01200 // AT1G75600 // AT1G29860 // AT5G10140 // AT5G65100 // AT2G28…
GO:0015103	F	inorganic anion transmembrane transporter activity	7	537	79	37767	0.00021	0.019	// AT4G08620 // AT1G22150 // AT5G19600 // AT1G08100 // AT1G77990 // AT5G43360 // AT1G78000
GO:0006855	P	multidrug transport	7	537	73	37767	0.00013	0.05	// AT3G30842 // AT1G71140 // AT1G15170 // AT2G04050 // AT2G04070 // AT1G15520 // AT1G66780
GO:0042493	P	response to drug	7	537	77	37767	0.00018	0.05	// AT3G30842 // AT1G71140 // AT1G15170 // AT2G04050 // AT2G04070 // AT1G15520 // AT1G66780
GO:0015893	P	drug transport	7	537	76	37767	0.00017	0.05	// AT3G30842 // AT1G71140 // AT1G15170 // AT2G04050 // AT2G04070 // AT1G15520 // AT1G66780
GO:0031667	P	response to nutrient levels	7	537	101	37767	0.00084	0.05	// AT5G48850 // AT2G45130 // AT2G11810 // AT2G14210 // AT3G05630 // AT5G13080 // AT1G78000
GO:0006812	P	cation transport	14	537	357	37767	0.00085	0.05	// AT2G36950 // AT5G52680 // AT3G63380 // AT2G07707 // AT2G07741 // AT5G55470 // AT5G09720 // AT1G29100 // AT5G52700 // AT5G60800 // AT1G22990 // AT2G07671 // AT1G15520 // AT2G04040
GO:0006811	P	ion transport	16	537	427	37767	0.0006	0.05	// AT2G36950 // AT5G52680 // AT3G63380 // AT4G08620 // AT2G07707 // AT2G07741 // AT5G55470 // AT5G09720 // AT1G29100 // AT5G52700 // AT5G60800 // AT1G08100 // AT1G22990 // AT2G07671 // AT1G15520 // AT2G04040
GO:0006355	P	regulation of transcription, DNA-dependent	29	537	987	37767	0.00028	0.05	// AT5G16600 // AT3G09230 // AT3G61630 // AT1G63210 // AT2G13960 // AT2G24700 // AT3G60490 // AT5G38740 // AT5G39810 // AT2G40740 // AT2G24680 // AT5G01200 // AT1G77570 // AT1G29860 // AT1G17950 // AT2G40340 // AT1G72350 // AT2G21900 // AT5G13080 // AT5G66980 // AT5G15830 // AT1G67220 // AT4G06746 // AT1G24210 // AT3G23240 // AT5G26170 // AT3G01970 // AT1G22985 // AT1G05055
GO:0010556	P	regulation of macromolecule biosynthetic process	44	537	1843	37767	0.00075	0.05	// AT1G29860 // AT5G16600 // AT3G09230 // AT3G22100 // AT3G61630 // AT1G63210 // AT2G13960 // AT2G24700 // AT1G43640 // AT1G47655 // AT3G24500 // AT3G60490 // AT3G46080 // AT5G38740 // AT5G39810 // AT2G40740 // AT2G21900 // AT2G24680 // AT5G01200 // AT1G77570 // AT1G13300 // AT5G65100 // AT2G41240 // AT2G40340 // AT1G03840 // AT1G31050 // AT4G38340 // AT3G04030 // AT3G46070 // AT4G33880 // AT5G13…
GO:0006351	P	transcription, DNA-dependent	29	537	1039	37767	0.00063	0.05	// AT5G16600 // AT3G09230 // AT3G61630 // AT1G63210 // AT2G13960 // AT2G24700 // AT3G60490 // AT5G38740 // AT5G39810 // AT2G40740 // AT2G24680 // AT5G01200 // AT1G77570 // AT1G29860 // AT1G17950 // AT2G40340 // AT1G72350 // AT2G21900 // AT5G13080 // AT5G66980 // AT5G15830 // AT1G67220 // AT4G06746 // AT1G24210 // AT3G23240 // AT5G26170 // AT3G01970 // AT1G22985 // AT1G05055
GO:0032774	P	RNA biosynthetic process	29	537	1040	37767	0.00064	0.05	// AT5G16600 // AT3G09230 // AT3G61630 // AT1G63210 // AT2G13960 // AT2G24700 // AT3G60490 // AT5G38740 // AT5G39810 // AT2G40740 // AT2G24680 // AT5G01200 // AT1G77570 // AT1G29860 // AT1G17950 // AT2G40340 // AT1G72350 // AT2G21900 // AT5G13080 // AT5G66980 // AT5G15830 // AT1G67220 // AT4G06746 // AT1G24210 // AT3G23240 // AT5G26170 // AT3G01970 // AT1G22985 // AT1G05055
GO:0030001	P	metal ion transport	11	537	224	37767	0.00053	0.05	// AT2G36950 // AT5G52680 // AT3G63380 // AT5G55470 // AT5G09720 // AT1G29100 // AT5G52700 // AT5G60800 // AT1G22990 // AT1G15520 // AT2G04040
GO:0051252	P	regulation of RNA metabolic process	29	537	996	37767	0.00033	0.05	// AT5G16600 // AT3G09230 // AT3G61630 // AT1G63210 // AT2G13960 // AT2G24700 // AT3G60490 // AT5G38740 // AT5G39810 // AT2G40740 // AT2G24680 // AT5G01200 // AT1G77570 // AT1G29860 // AT1G17950 // AT2G40340 // AT1G72350 // AT2G21900 // AT5G13080 // AT5G66980 // AT5G15830 // AT1G67220 // AT4G06746 // AT1G24210 // AT3G23240 // AT5G26170 // AT3G01970 // AT1G22985 // AT1G05055
GO:0045449	P	regulation of transcription	44	537	1802	37767	0.00048	0.05	// AT1G29860 // AT5G16600 // AT3G09230 // AT3G22100 // AT3G61630 // AT1G63210 // AT2G13960 // AT2G24700 // AT1G43640 // AT1G47655 // AT3G24500 // AT3G60490 // AT3G46080 // AT5G38740 // AT5G39810 // AT2G40740 // AT2G21900 // AT2G24680 // AT5G01200 // AT1G77570 // AT1G13300 // AT5G65100 // AT2G41240 // AT2G40340 // AT1G03840 // AT1G31050 // AT4G38340 // AT3G04030 // AT3G46070 // AT4G33880 // AT5G13…
GO:0019219	P	regulation of nucleobase, nucleoside, nucleotide and nucleic acid metabolic process	44	537	1847	37767	0.00078	0.05	// AT1G29860 // AT5G16600 // AT3G09230 // AT3G22100 // AT3G61630 // AT1G63210 // AT2G13960 // AT2G24700 // AT1G43640 // AT1G47655 // AT3G24500 // AT3G60490 // AT3G46080 // AT5G38740 // AT5G39810 // AT2G40740 // AT2G21900 // AT2G24680 // AT5G01200 // AT1G77570 // AT1G13300 // AT5G65100 // AT2G41240 // AT2G40340 // AT1G03840 // AT1G31050 // AT4G38340 // AT3G04030 // AT3G46070 // AT4G33880 // AT5G13…
GO:0080090	P	regulation of primary metabolic process	45	537	1952	37767	0.0013	0.052	// AT1G29860 // AT5G16600 // AT3G09230 // AT3G22100 // AT3G61630 // AT1G63210 // AT2G13960 // AT2G24700 // AT1G43640 // AT1G47655 // AT3G24500 // AT3G60490 // AT3G46080 // AT5G38740 // AT5G39810 // AT2G40740 // AT2G21900 // AT2G24680 // AT5G01200 // AT1G77570 // AT1G13300 // AT5G65100 // AT2G41240 // AT2G40340 // AT1G03840 // AT1G31050 // AT4G38340 // AT3G04030 // AT3G46070 // AT4G33880 // AT5G13…
GO:0009889	P	regulation of biosynthetic process	44	537	1881	37767	0.0011	0.052	// AT1G29860 // AT5G16600 // AT3G09230 // AT3G22100 // AT3G61630 // AT1G63210 // AT2G13960 // AT2G24700 // AT1G43640 // AT1G47655 // AT3G24500 // AT3G60490 // AT3G46080 // AT5G38740 // AT5G39810 // AT2G40740 // AT2G21900 // AT2G24680 // AT5G01200 // AT1G77570 // AT1G13300 // AT5G65100 // AT2G41240 // AT2G40340 // AT1G03840 // AT1G31050 // AT4G38340 // AT3G04030 // AT3G46070 // AT4G33880 // AT5G13…
GO:0006350	P	transcription	45	537	1923	37767	0.00097	0.052	// AT1G29860 // AT5G16600 // AT3G09230 // AT3G22100 // AT3G61630 // AT1G63210 // AT2G13960 // AT2G24700 // AT1G43640 // AT1G47655 // AT3G24500 // AT3G60490 // AT3G46080 // AT5G38740 // AT5G39810 // AT2G40740 // AT2G21900 // AT2G24680 // AT5G01200 // AT1G77570 // AT1G13300 // AT5G65100 // AT2G41240 // AT2G40340 // AT1G03840 // AT1G31050 // AT4G38340 // AT3G04030 // AT3G46070 // AT4G33880 // AT5G13…
GO:0009404	P	toxin metabolic process	5	537	53	37767	0.0013	0.052	// AT3G03190 // AT1G78360 // AT5G62480 // AT1G17180 // AT2G02930
GO:0009407	P	toxin catabolic process	5	537	53	37767	0.0013	0.052	// AT3G03190 // AT1G78360 // AT5G62480 // AT1G17180 // AT2G02930
GO:0031326	P	regulation of cellular biosynthetic process	44	537	1881	37767	0.0011	0.052	// AT1G29860 // AT5G16600 // AT3G09230 // AT3G22100 // AT3G61630 // AT1G63210 // AT2G13960 // AT2G24700 // AT1G43640 // AT1G47655 // AT3G24500 // AT3G60490 // AT3G46080 // AT5G38740 // AT5G39810 // AT2G40740 // AT2G21900 // AT2G24680 // AT5G01200 // AT1G77570 // AT1G13300 // AT5G65100 // AT2G41240 // AT2G40340 // AT1G03840 // AT1G31050 // AT4G38340 // AT3G04030 // AT3G46070 // AT4G33880 // AT5G13…
GO:0051171	P	regulation of nitrogen compound metabolic process	44	537	1888	37767	0.0012	0.052	// AT1G29860 // AT5G16600 // AT3G09230 // AT3G22100 // AT3G61630 // AT1G63210 // AT2G13960 // AT2G24700 // AT1G43640 // AT1G47655 // AT3G24500 // AT3G60490 // AT3G46080 // AT5G38740 // AT5G39810 // AT2G40740 // AT2G21900 // AT2G24680 // AT5G01200 // AT1G77570 // AT1G13300 // AT5G65100 // AT2G41240 // AT2G40340 // AT1G03840 // AT1G31050 // AT4G38340 // AT3G04030 // AT3G46070 // AT4G33880 // AT5G13…
GO:0030246	F	carbohydrate binding	9	537	162	37767	0.00073	0.052	// AT5G45090 // AT1G61480 // AT2G43570 // AT2G26400 // AT4G28350 // AT1G67520 // AT2G26820 // AT2G43590 // AT5G59260
GO:0015238	F	drug transmembrane transporter activity	6	537	74	37767	0.00092	0.053	// AT1G71140 // AT1G15170 // AT2G04050 // AT2G04070 // AT2G04040 // AT1G66780
GO:0022857	F	transmembrane transporter activity	30	537	1128	37767	0.0011	0.053	// AT3G63380 // AT1G22150 // AT5G09720 // AT5G43360 // AT2G07671 // AT5G61730 // AT1G77990 // AT1G15170 // AT2G04050 // AT3G47740 // AT3G13080 // AT3G60970 // AT3G01760 // AT2G04070 // AT1G15520 // AT4G08620 // AT5G19600 // AT1G08100 // AT5G55470 // AT1G79410 // AT1G78000 // AT2G07741 // AT2G07707 // AT1G71140 // AT5G61700 // AT3G13090 // AT2G46430 // AT2G07687 // AT1G66780 // AT2G04040
GO:0016757	F	transferase activity, transferring glycosyl groups	18	537	544	37767	0.0011	0.053	// AT2G36770 // AT1G60470 // AT5G05900 // AT4G02390 // AT3G57380 // AT2G28110 // AT2G36780 // AT2G11810 // AT1G64920 // AT1G56600 // AT2G36800 // AT4G10120 // AT1G05680 // AT4G01970 // AT1G05670 // AT5G49690 // AT2G43820 // AT1G61050
GO:0034728	P	nucleosome organization	5	537	56	37767	0.0017	0.059	// AT2G28720 // AT2G18050 // AT1G75600 // AT5G59690 // AT1G13370
GO:0006334	P	nucleosome assembly	5	537	56	37767	0.0017	0.059	// AT2G28720 // AT2G18050 // AT1G75600 // AT5G59690 // AT1G13370
GO:0009991	P	response to extracellular stimulus	7	537	117	37767	0.0019	0.065	// AT5G48850 // AT2G45130 // AT2G11810 // AT2G14210 // AT3G05630 // AT5G13080 // AT1G78000
GO:0004364	F	glutathione transferase activity	5	537	57	37767	0.0018	0.069	// AT3G03190 // AT1G78360 // AT5G62480 // AT1G17180 // AT2G02930
GO:0016820	F	hydrolase activity, acting on acid anhydrides, catalyzing transmembrane movement of substances	9	537	183	37767	0.0017	0.069	// AT3G63380 // AT5G61730 // AT2G07707 // AT3G47740 // AT5G61700 // AT3G13090 // AT3G13080 // AT3G60970 // AT1G15520
GO:0065004	P	protein-DNA complex assembly	5	537	60	37767	0.0022	0.07	// AT2G28720 // AT2G18050 // AT1G75600 // AT5G59690 // AT1G13370
GO:0031497	P	chromatin assembly	5	537	60	37767	0.0022	0.07	// AT2G28720 // AT2G18050 // AT1G75600 // AT5G59690 // AT1G13370
GO:0008509	F	anion transmembrane transporter activity	7	537	120	37767	0.0022	0.077	// AT4G08620 // AT1G22150 // AT5G19600 // AT1G08100 // AT1G77990 // AT5G43360 // AT1G78000
GO:0043169	F	cation binding	46	537	2087	37767	0.0027	0.077	// AT2G36950 // AT5G39130 // AT5G38910 // AT3G47480 // AT5G39110 // AT5G64100 // AT3G54270 // AT3G56350 // AT2G38390 // AT4G19720 // AT3G27473 // AT3G46080 // AT5G49200 // AT1G29100 // AT5G52700 // AT1G08500 // AT1G64480 // AT4G19750 // AT5G01320 // AT5G07060 // AT5G49665 // AT1G22990 // AT3G46810 // AT1G03840 // AT2G26130 // AT4G26560 // AT4G01350 // AT2G34940 // AT5G39120 // AT3G46070 // AT5G60…
GO:0045735	F	nutrient reservoir activity	5	537	63	37767	0.0027	0.077	// AT5G39130 // AT5G39110 // AT4G36700 // AT5G38910 // AT5G39120
GO:0043167	F	ion binding	46	537	2087	37767	0.0027	0.077	// AT2G36950 // AT5G39130 // AT5G38910 // AT3G47480 // AT5G39110 // AT5G64100 // AT3G54270 // AT3G56350 // AT2G38390 // AT4G19720 // AT3G27473 // AT3G46080 // AT5G49200 // AT1G29100 // AT5G52700 // AT1G08500 // AT1G64480 // AT4G19750 // AT5G01320 // AT5G07060 // AT5G49665 // AT1G22990 // AT3G46810 // AT1G03840 // AT2G26130 // AT4G26560 // AT4G01350 // AT2G34940 // AT5G39120 // AT3G46070 // AT5G60…
GO:0031323	P	regulation of cellular metabolic process	45	537	2036	37767	0.0028	0.084	// AT1G29860 // AT5G16600 // AT3G09230 // AT3G22100 // AT3G61630 // AT1G63210 // AT2G13960 // AT2G24700 // AT1G43640 // AT1G47655 // AT3G24500 // AT3G60490 // AT3G46080 // AT5G38740 // AT5G39810 // AT2G40740 // AT2G21900 // AT2G24680 // AT5G01200 // AT1G77570 // AT1G13300 // AT5G65100 // AT2G41240 // AT2G40340 // AT1G03840 // AT1G31050 // AT4G38340 // AT3G04030 // AT3G46070 // AT4G33880 // AT5G13…
GO:0006323	P	DNA packaging	5	537	64	37767	0.0029	0.084	// AT2G28720 // AT2G18050 // AT1G75600 // AT5G59690 // AT1G13370
GO:0046872	F	metal ion binding	44	537	1997	37767	0.0033	0.089	// AT2G36950 // AT5G39130 // AT5G38910 // AT3G47480 // AT5G39110 // AT5G64100 // AT3G54270 // AT3G56350 // AT2G38390 // AT3G27473 // AT3G46080 // AT5G49200 // AT1G29100 // AT5G52700 // AT1G08500 // AT1G64480 // AT5G01320 // AT5G07060 // AT5G49665 // AT1G22990 // AT3G46810 // AT1G03840 // AT2G26130 // AT4G26560 // AT4G01350 // AT2G34940 // AT5G39120 // AT3G46070 // AT5G60800 // AT2G26400 // AT2G02…
GO:0055085	P	transmembrane transport	10	537	244	37767	0.0033	0.093	// AT3G30842 // AT2G07707 // AT2G07741 // AT1G71140 // AT1G15170 // AT2G04050 // AT2G04070 // AT2G07671 // AT1G15520 // AT1G66780
GO:0060255	P	regulation of macromolecule metabolic process	45	537	2060	37767	0.0035	0.093	// AT1G29860 // AT5G16600 // AT3G09230 // AT3G22100 // AT3G61630 // AT1G63210 // AT2G13960 // AT2G24700 // AT1G43640 // AT1G47655 // AT3G24500 // AT3G60490 // AT3G46080 // AT5G38740 // AT5G39810 // AT2G40740 // AT2G21900 // AT2G24680 // AT5G01200 // AT1G77570 // AT1G13300 // AT5G65100 // AT2G41240 // AT2G40340 // AT1G03840 // AT1G31050 // AT4G38340 // AT3G04030 // AT3G46070 // AT4G33880 // AT5G13…
GO:0010468	P	regulation of gene expression	44	537	2001	37767	0.0034	0.093	// AT1G29860 // AT5G16600 // AT3G09230 // AT3G22100 // AT3G61630 // AT1G63210 // AT2G13960 // AT2G24700 // AT1G43640 // AT1G47655 // AT3G24500 // AT3G60490 // AT3G46080 // AT5G38740 // AT5G39810 // AT2G40740 // AT2G21900 // AT2G24680 // AT5G01200 // AT1G77570 // AT1G13300 // AT5G65100 // AT2G41240 // AT2G40340 // AT1G03840 // AT1G31050 // AT4G38340 // AT3G04030 // AT3G46070 // AT4G33880 // AT5G13…
GO:0016887	F	ATPase activity	15	537	482	37767	0.0049	0.12	// AT3G63380 // AT5G61730 // AT3G47740 // AT4G16680 // AT3G28540 // AT5G61700 // AT3G13090 // AT3G13080 // AT3G60970 // AT5G40010 // AT1G43910 // AT3G28510 // AT2G18193 // AT2G07671 // AT1G15520
GO:0042626	F	ATPase activity, coupled to transmembrane movement of substances	8	537	181	37767	0.0054	0.12	// AT3G63380 // AT5G61730 // AT3G47740 // AT5G61700 // AT3G13090 // AT3G13080 // AT3G60970 // AT1G15520
GO:0043492	F	ATPase activity, coupled to movement of substances	8	537	181	37767	0.0054	0.12	// AT3G63380 // AT5G61730 // AT3G47740 // AT5G61700 // AT3G13090 // AT3G13080 // AT3G60970 // AT1G15520
GO:0009267	P	cellular response to starvation	5	537	73	37767	0.0048	0.13	// AT2G45130 // AT3G05630 // AT5G48850 // AT2G11810 // AT1G78000
GO:0016070	P	RNA metabolic process	37	537	1657	37767	0.0056	0.14	// AT5G16600 // AT3G09230 // AT3G61630 // AT1G63210 // AT2G13960 // AT2G24700 // AT1G08115 // AT3G57645 // AT4G38780 // AT3G60490 // AT5G38740 // AT5G45990 // AT2G40740 // AT2G21900 // AT2G24680 // AT5G01200 // AT1G77570 // AT1G29860 // AT1G17950 // AT2G40340 // AT1G72350 // AT3G13210 // AT5G13080 // AT5G66980 // AT5G15830 // AT1G67220 // AT4G06746 // AT1G24210 // AT1G27890 // AT3G23240 // AT5G39…
GO:0005576	C	extracellular region	12	537	285	37767	0.0011	0.15	// AT5G39130 // AT4G14630 // AT4G33720 // AT2G18660 // AT5G39110 // AT2G43570 // AT1G68765 // AT5G39120 // AT5G39190 // AT4G33710 // AT4G07820 // AT5G38910
GO:0019222	P	regulation of metabolic process	46	537	2210	37767	0.0074	0.17	// AT1G29860 // AT5G16600 // AT3G09230 // AT3G22100 // AT3G61630 // AT1G63210 // AT2G13960 // AT2G24700 // AT1G43640 // AT1G47655 // AT3G24500 // AT3G60490 // AT3G46080 // AT5G38740 // AT5G39810 // AT2G40740 // AT2G21900 // AT2G24680 // AT5G01200 // AT1G77570 // AT1G13300 // AT5G65100 // AT2G41240 // AT2G40340 // AT1G03840 // AT1G31050 // AT4G38340 // AT3G04030 // AT3G46070 // AT4G33880 // AT5G13…
GO:0031669	P	cellular response to nutrient levels	5	537	82	37767	0.0077	0.17	// AT2G45130 // AT3G05630 // AT5G48850 // AT2G11810 // AT1G78000
GO:0006333	P	chromatin assembly or disassembly	5	537	82	37767	0.0077	0.17	// AT2G28720 // AT2G18050 // AT1G75600 // AT5G59690 // AT1G13370
GO:0042594	P	response to starvation	5	537	81	37767	0.0073	0.17	// AT2G45130 // AT3G05630 // AT5G48850 // AT2G11810 // AT1G78000
GO:0022804	F	active transmembrane transporter activity	18	537	664	37767	0.0084	0.18	// AT3G63380 // AT5G61730 // AT1G66780 // AT3G47740 // AT5G55470 // AT1G71140 // AT5G61700 // AT2G04050 // AT3G13090 // AT3G13080 // AT1G79410 // AT5G43360 // AT1G15170 // AT3G60970 // AT2G04070 // AT3G01760 // AT1G15520 // AT2G04040
GO:0050794	P	regulation of cellular process	65	537	3375	37767	0.0086	0.19	// AT5G16600 // AT3G09230 // AT3G22100 // AT3G61630 // AT1G63210 // AT2G13960 // AT2G24700 // AT1G43640 // AT1G47655 // AT4G33880 // AT3G24500 // AT4G34930 // AT3G27473 // AT3G46080 // AT3G23240 // AT1G67710 // AT5G45000 // AT5G38740 // AT5G39810 // AT2G40740 // AT5G26900 // AT2G21900 // AT1G64480 // AT2G24680 // AT5G01200 // AT1G77570 // AT1G29860 // AT5G65100 // AT2G41240 // AT3G46810 // AT2G40…
GO:0012505	C	endomembrane system	68	537	3416	37767	0.0035	0.24	// AT3G48640 // AT5G39130 // AT2G07719 // AT4G15160 // AT5G38910 // AT1G49470 // AT3G47480 // AT5G48175 // AT5G39110 // AT1G51913 // AT2G13960 // AT1G67000 // AT2G07739 // AT1G26240 // AT3G56350 // AT2G38390 // AT1G43910 // AT3G03500 // AT2G36724 // AT1G52050 // AT1G52070 // AT1G36622 // AT4G09780 // AT4G07820 // AT5G54370 // AT4G33710 // AT1G26380 // AT3G15760 // AT1G44180 // AT1G77570 // AT1G33…
GO:0019825	F	oxygen binding	9	537	255	37767	0.013	0.25	// AT2G28850 // AT2G30750 // AT4G31970 // AT4G37430 // AT4G37370 // AT3G26220 // AT4G15380 // AT3G14680 // AT3G26210
GO:0015297	F	antiporter activity	7	537	170	37767	0.013	0.25	// AT5G55470 // AT1G71140 // AT1G15170 // AT2G04050 // AT2G04070 // AT1G66780 // AT2G04040
GO:0005215	F	transporter activity	32	537	1477	37767	0.014	0.26	// AT3G63380 // AT1G22150 // AT2G18180 // AT3G61450 // AT5G09720 // AT5G43360 // AT2G07671 // AT5G61730 // AT1G77990 // AT1G15170 // AT2G04050 // AT3G47740 // AT3G13080 // AT3G60970 // AT3G01760 // AT2G04070 // AT1G15520 // AT4G08620 // AT5G19600 // AT1G08100 // AT5G55470 // AT1G79410 // AT1G78000 // AT2G07741 // AT2G07707 // AT1G71140 // AT5G61700 // AT3G13090 // AT2G46430 // AT2G07687 // AT1G66…
GO:0008194	F	UDP-glycosyltransferase activity	8	537	219	37767	0.015	0.27	// AT2G36770 // AT2G28110 // AT2G36780 // AT2G11810 // AT2G36800 // AT1G05680 // AT5G05900 // AT2G43820
GO:0031668	P	cellular response to extracellular stimulus	5	537	98	37767	0.015	0.32	// AT2G45130 // AT3G05630 // AT5G48850 // AT2G11810 // AT1G78000
GO:0006807	P	nitrogen compound metabolic process	70	537	3826	37767	0.019	0.37	// AT5G16600 // AT3G63380 // AT1G36370 // AT1G50090 // AT3G22100 // AT3G61630 // AT1G63210 // AT2G13960 // AT1G64660 // AT2G24700 // AT1G43640 // AT1G47655 // AT3G57645 // AT4G38780 // AT3G59890 // AT3G09230 // AT3G60490 // AT3G46080 // AT3G23240 // AT2G40340 // AT1G66730 // AT5G38740 // AT2G07707 // AT5G45990 // AT5G14760 // AT2G07671 // AT3G13210 // AT2G24680 // AT5G01200 // AT1G77570 // AT1G29…
GO:0050789	P	regulation of biological process	68	537	3697	37767	0.018	0.37	// AT5G16600 // AT3G09230 // AT3G22100 // AT3G61630 // AT1G63210 // AT2G13960 // AT2G24700 // AT1G43640 // AT1G47655 // AT4G33880 // AT3G24500 // AT4G34930 // AT3G27473 // AT3G46080 // AT3G23240 // AT1G67710 // AT5G48850 // AT5G38740 // AT5G39810 // AT2G40740 // AT5G26900 // AT2G21900 // AT1G64480 // AT2G24680 // AT5G01200 // AT1G77570 // AT1G29860 // AT5G10140 // AT5G65100 // AT2G41240 // AT3G46…
GO:0006139	P	nucleobase, nucleoside, nucleotide and nucleic acid metabolic process	60	537	3198	37767	0.018	0.37	// AT5G16600 // AT3G63380 // AT3G22100 // AT3G61630 // AT1G63210 // AT2G13960 // AT3G09230 // AT2G24700 // AT1G43640 // AT1G47655 // AT3G57645 // AT4G38780 // AT3G60490 // AT3G46080 // AT3G23240 // AT1G66730 // AT5G38740 // AT5G45990 // AT5G14760 // AT2G07671 // AT3G13210 // AT2G24680 // AT5G01200 // AT1G77570 // AT1G29860 // AT2G30350 // AT5G65100 // AT2G41240 // AT2G40340 // AT1G72350 // AT1G31…
GO:0016765	F	transferase activity, transferring alkyl or aryl (other than methyl) groups	6	537	158	37767	0.029	0.42	// AT3G03190 // AT5G56080 // AT2G02930 // AT1G78360 // AT5G62480 // AT1G17180
GO:0015405	F	P-P-bond-hydrolysis-driven transmembrane transporter activity	8	537	243	37767	0.026	0.42	// AT3G63380 // AT5G61730 // AT3G47740 // AT5G61700 // AT3G13090 // AT3G13080 // AT3G60970 // AT1G15520
GO:0015399	F	primary active transmembrane transporter activity	8	537	244	37767	0.027	0.42	// AT3G63380 // AT5G61730 // AT3G47740 // AT5G61700 // AT3G13090 // AT3G13080 // AT3G60970 // AT1G15520
GO:0003824	F	catalytic activity	157	537	9638	37767	0.029	0.42	// AT1G24320 // AT1G64660 // AT1G50090 // AT1G03650 // AT5G64100 // AT3G54270 // AT4G13890 // AT4G21840 // AT2G23030 // AT5G24530 // AT5G24240 // AT3G03500 // AT1G60500 // AT5G25230 // AT5G47590 // AT1G54010 // AT1G47600 // AT2G03760 // AT5G20470 // AT3G16360 // AT2G36770 // AT2G31425 // AT1G36180 // AT2G30660 // AT5G62480 // AT3G22740 // AT1G02590 // AT3G26610 // AT1G26390 // AT1G07180 // AT2G26…
GO:0015075	F	ion transmembrane transporter activity	16	537	655	37767	0.029	0.42	// AT3G63380 // AT5G55470 // AT4G08620 // AT1G22150 // AT5G19600 // AT2G07741 // AT1G78000 // AT5G09720 // AT1G77990 // AT1G08100 // AT1G79410 // AT5G43360 // AT2G07687 // AT2G46430 // AT2G07671 // AT2G07707
GO:0009055	F	electron carrier activity	9	537	294	37767	0.028	0.42	// AT1G26390 // AT1G26420 // AT1G26410 // AT1G08500 // AT5G64100 // AT1G02590 // AT2G38390 // AT1G26380 // AT5G57920
GO:0009605	P	response to external stimulus	12	537	429	37767	0.023	0.43	// AT5G13320 // AT5G48850 // AT5G43570 // AT2G45130 // AT2G11810 // AT2G14210 // AT3G05630 // AT2G02950 // AT5G13080 // AT4G13300 // AT1G78000 // AT1G19660
GO:0050896	P	response to stimulus	73	537	4057	37767	0.023	0.43	// AT1G75750 // AT3G02480 // AT3G09230 // AT1G67100 // AT5G16600 // AT2G30750 // AT2G02120 // AT4G11340 // AT3G50470 // AT5G64100 // AT4G13300 // AT1G68765 // AT5G43570 // AT2G38390 // AT5G02490 // AT5G24530 // AT5G45000 // AT3G46080 // AT5G63160 // AT5G13370 // AT1G67710 // AT3G24500 // AT1G66730 // AT5G48850 // AT3G50460 // AT1G15170 // AT2G04050 // AT3G23240 // AT2G30350 // AT2G03760 // AT5G10…
GO:0016491	F	oxidoreductase activity	30	537	1463	37767	0.032	0.44	// AT4G04800 // AT1G62180 // AT3G44540 // AT5G64100 // AT2G29150 // AT3G56350 // AT2G38390 // AT5G24530 // AT1G26410 // AT5G14760 // AT1G26380 // AT3G59890 // AT1G02590 // AT1G16410 // AT3G09220 // AT5G38900 // AT2G30670 // AT1G26420 // AT1G12010 // AT2G26400 // AT2G15620 // AT3G01420 // AT1G26390 // AT5G43450 // AT1G07180 // AT2G26550 // AT1G32350 // AT5G39190 // AT2G07687 // AT4G21840
GO:0016817	F	hydrolase activity, acting on acid anhydrides	19	537	839	37767	0.035	0.47	// AT5G20470 // AT3G63380 // AT1G60500 // AT2G07707 // AT5G25230 // AT3G47740 // AT4G16680 // AT3G28540 // AT5G61700 // AT3G13090 // AT3G13080 // AT5G61730 // AT3G60970 // AT5G40010 // AT1G43910 // AT3G28510 // AT2G18193 // AT2G07671 // AT1G15520
GO:0017111	F	nucleoside-triphosphatase activity	18	537	792	37767	0.039	0.5	// AT5G20470 // AT3G63380 // AT1G60500 // AT5G25230 // AT3G47740 // AT4G16680 // AT3G28540 // AT5G61700 // AT3G13090 // AT3G13080 // AT5G61730 // AT3G60970 // AT5G40010 // AT1G43910 // AT3G28510 // AT2G18193 // AT2G07671 // AT1G15520
GO:0005488	F	binding	179	537	11258	37767	0.043	0.54	// AT3G22100 // AT5G39110 // AT5G64100 // AT3G54270 // AT2G07734 // AT1G60500 // AT5G07650 // AT5G25230 // AT2G40740 // AT3G47480 // AT1G26380 // AT2G28720 // AT5G01320 // AT3G26220 // AT2G37870 // AT1G31050 // AT5G27130 // AT2G34940 // AT2G14210 // AT2G42330 // AT5G15830 // AT1G17950 // AT4G04220 // AT1G26390 // AT5G52680 // AT4G33880 // AT1G27890 // AT1G13300 // AT5G41410 // AT2G26820 // AT1G49…
GO:0033554	P	cellular response to stress	11	537	399	37767	0.031	0.57	// AT3G46530 // AT1G66730 // AT5G48850 // AT2G45130 // AT2G11810 // AT3G05630 // AT2G30350 // AT3G56350 // AT1G78000 // AT5G13080 // AT1G05055
GO:0009165	P	nucleotide biosynthetic process	5	537	122	37767	0.034	0.59	// AT5G14760 // AT2G07741 // AT3G63380 // AT2G07671 // AT2G07707
GO:0034641	P	cellular nitrogen compound metabolic process	13	537	506	37767	0.033	0.59	// AT1G64660 // AT5G56080 // AT1G50090 // AT4G13890 // AT5G14760 // AT5G22800 // AT1G44180 // AT3G59890 // AT1G36370 // AT5G38200 // AT1G17960 // AT2G43820 // AT2G26550
GO:0051716	P	cellular response to stimulus	19	537	840	37767	0.036	0.61	// AT3G46530 // AT3G16360 // AT1G66730 // AT5G48850 // AT1G70510 // AT2G45130 // AT3G23240 // AT5G13320 // AT2G11810 // AT3G24500 // AT3G15500 // AT3G05630 // AT2G02950 // AT2G30350 // AT3G56350 // AT1G05055 // AT1G78000 // AT5G13080 // AT1G67710
GO:0015078	F	hydrogen ion transmembrane transporter activity	5	537	139	37767	0.053	0.64	// AT2G07741 // AT5G55470 // AT2G07671 // AT2G07707 // AT2G07687
GO:0016818	F	hydrolase activity, acting on acid anhydrides, in phosphorus-containing anhydrides	18	537	837	37767	0.059	0.66	// AT5G20470 // AT3G63380 // AT1G60500 // AT5G25230 // AT3G47740 // AT4G16680 // AT3G28540 // AT5G61700 // AT3G13090 // AT3G13080 // AT5G61730 // AT3G60970 // AT5G40010 // AT1G43910 // AT3G28510 // AT2G18193 // AT2G07671 // AT1G15520
GO:0016758	F	transferase activity, transferring hexosyl groups	9	537	340	37767	0.059	0.66	// AT2G36770 // AT2G28110 // AT1G60470 // AT2G11810 // AT1G56600 // AT2G36800 // AT1G05680 // AT4G01970 // AT2G43820
GO:0016462	F	pyrophosphatase activity	18	537	832	37767	0.056	0.66	// AT5G20470 // AT3G63380 // AT1G60500 // AT5G25230 // AT3G47740 // AT4G16680 // AT3G28540 // AT5G61700 // AT3G13090 // AT3G13080 // AT5G61730 // AT3G60970 // AT5G40010 // AT1G43910 // AT3G28510 // AT2G18193 // AT2G07671 // AT1G15520
GO:0016740	F	transferase activity	58	537	3321	37767	0.063	0.68	// AT1G64920 // AT3G01490 // AT1G36370 // AT5G05900 // AT1G50090 // AT4G02390 // AT1G61480 // AT1G03650 // AT2G36780 // AT1G67000 // AT2G11810 // AT4G01970 // AT4G28350 // AT5G49690 // AT2G36800 // AT5G24240 // AT5G42830 // AT1G60470 // AT4G10120 // AT1G17180 // AT1G78360 // AT5G01320 // AT1G67220 // AT2G03760 // AT1G67520 // AT2G43820 // AT5G59260 // AT3G16360 // AT1G47890 // AT5G56080 // AT2G02…
GO:0015291	F	secondary active transmembrane transporter activity	9	537	345	37767	0.063	0.68	// AT5G55470 // AT1G71140 // AT1G15170 // AT2G04050 // AT1G79410 // AT5G43360 // AT2G04070 // AT1G66780 // AT2G04040
GO:0065007	P	biological regulation	73	537	4188	37767	0.042	0.7	// AT1G75750 // AT5G16600 // AT3G09230 // AT3G22100 // AT3G61630 // AT1G63210 // AT2G13960 // AT2G24700 // AT1G43640 // AT1G47655 // AT4G33880 // AT3G24500 // AT4G34930 // AT4G10510 // AT3G27473 // AT3G46080 // AT3G23240 // AT1G67710 // AT5G48850 // AT5G38740 // AT5G39810 // AT2G40740 // AT5G26900 // AT2G21900 // AT2G36800 // AT1G64480 // AT2G24680 // AT5G01200 // AT1G77570 // AT1G29860 // AT2G03…
GO:0042623	F	ATPase activity, coupled	9	537	359	37767	0.077	0.78	// AT3G63380 // AT5G61730 // AT3G47740 // AT5G61700 // AT3G13090 // AT3G13080 // AT3G60970 // AT4G16680 // AT1G15520
GO:0015077	F	monovalent inorganic cation transmembrane transporter activity	5	537	156	37767	0.077	0.78	// AT2G07741 // AT5G55470 // AT2G07671 // AT2G07707 // AT2G07687
GO:0004553	F	hydrolase activity, hydrolyzing O-glycosyl compounds	11	537	476	37767	0.084	0.83	// AT3G47050 // AT1G24320 // AT1G51470 // AT4G19720 // AT1G47600 // AT4G19750 // AT2G43570 // AT3G26610 // AT4G01970 // AT3G60120 // AT2G43590
GO:0044106	P	cellular amine metabolic process	11	537	438	37767	0.054	0.87	// AT1G64660 // AT5G56080 // AT1G50090 // AT4G13890 // AT5G22800 // AT1G44180 // AT3G59890 // AT1G36370 // AT5G38200 // AT2G43820 // AT1G17960
GO:0042221	P	response to chemical stimulus	39	537	2085	37767	0.053	0.87	// AT1G75750 // AT3G02480 // AT3G09230 // AT1G67100 // AT5G16600 // AT5G64100 // AT3G56350 // AT5G02490 // AT3G46080 // AT5G13370 // AT1G67710 // AT3G30842 // AT1G15170 // AT2G04050 // AT3G23240 // AT2G04070 // AT1G15520 // AT1G17950 // AT3G16360 // AT1G70510 // AT5G56080 // AT4G26560 // AT5G13320 // AT4G01350 // AT2G14210 // AT2G18050 // AT2G41240 // AT3G01420 // AT3G03190 // AT5G44460 // AT5G63…
GO:0007165	P	signal transduction	20	537	1228	37767	0.3	1	// AT3G16360 // AT1G70510 // AT1G47890 // AT5G45000 // AT4G04220 // AT4G34930 // AT5G13320 // AT5G26900 // AT4G11340 // AT4G19925 // AT1G64480 // AT3G15500 // AT2G02950 // AT3G24500 // AT3G23120 // AT3G46810 // AT2G02690 // AT3G27473 // AT3G23240 // AT1G67710
GO:0009755	P	hormone-mediated signaling pathway	5	537	321	37767	0.48	1	// AT3G16360 // AT1G70510 // AT3G23240 // AT3G24500 // AT1G67710
GO:0000003	P	reproduction	8	537	1186	37767	0.99	1	// AT1G70510 // AT3G61630 // AT5G22800 // AT5G41410 // AT1G68765 // AT2G02240 // AT1G61480 // AT5G10140
GO:0009617	P	response to bacterium	6	537	247	37767	0.15	1	// AT5G13320 // AT2G30750 // AT5G02490 // AT2G26820 // AT5G24530 // AT1G33890
GO:0048513	P	organ development	8	537	838	37767	0.91	1	// AT1G70510 // AT3G61630 // AT1G08100 // AT5G41410 // AT1G68765 // AT2G14210 // AT3G05630 // AT5G13080
GO:0046483	P	heterocycle metabolic process	7	537	460	37767	0.48	1	// AT2G07741 // AT3G63380 // AT5G56080 // AT2G26550 // AT2G07707 // AT2G43820 // AT2G07671
GO:0032787	P	monocarboxylic acid metabolic process	5	537	408	37767	0.69	1	// AT5G13320 // AT5G56080 // AT2G43820 // AT2G11810 // AT3G01420
GO:0034645	P	cellular macromolecule biosynthetic process	52	537	3661	37767	0.52	1	// AT1G29860 // AT5G39810 // AT3G09230 // AT3G22100 // AT3G61630 // AT1G63210 // AT2G13960 // AT2G24700 // AT1G43640 // AT1G47655 // AT3G24500 // AT3G60490 // AT3G46080 // AT2G07715 // AT1G66730 // AT5G38740 // AT3G28500 // AT2G40740 // AT2G07734 // AT2G21900 // AT2G24680 // AT5G01200 // AT1G77570 // AT1G13300 // AT5G65100 // AT2G41240 // AT2G40340 // AT1G03840 // AT1G31050 // AT4G38340 // AT3G04…
GO:0003006	P	reproductive developmental process	7	537	978	37767	0.99	1	// AT1G70510 // AT3G61630 // AT5G22800 // AT5G41410 // AT1G68765 // AT2G02240 // AT5G10140
GO:0043436	P	oxoacid metabolic process	14	537	859	37767	0.34	1	// AT5G13320 // AT1G64660 // AT5G56080 // AT1G50090 // AT4G13890 // AT5G22800 // AT2G11810 // AT1G44180 // AT3G59890 // AT1G36370 // AT5G38200 // AT1G17960 // AT2G43820 // AT3G01420
GO:0010035	P	response to inorganic substance	5	537	279	37767	0.37	1	// AT4G26560 // AT5G02490 // AT5G56080 // AT3G56350 // AT5G44460
GO:0051707	P	response to other organism	10	537	599	37767	0.35	1	// AT3G46530 // AT5G13320 // AT2G30750 // AT3G50460 // AT3G50470 // AT5G02490 // AT2G26820 // AT5G24530 // AT1G33890 // AT3G01420
GO:0010033	P	response to organic substance	21	537	1342	37767	0.36	1	// AT3G16360 // AT1G70510 // AT3G09230 // AT1G67100 // AT1G75750 // AT5G13320 // AT5G63160 // AT4G01350 // AT2G17040 // AT1G68765 // AT3G15500 // AT3G05630 // AT3G23240 // AT3G24500 // AT5G16600 // AT1G17950 // AT1G67710 // AT3G46080 // AT1G15520 // AT5G13370 // AT3G01420
GO:0051704	P	multi-organism process	11	537	776	37767	0.55	1	// AT3G46530 // AT5G13320 // AT2G30750 // AT1G61480 // AT3G50460 // AT3G50470 // AT5G02490 // AT2G26820 // AT5G24530 // AT1G33890 // AT3G01420
GO:0044248	P	cellular catabolic process	11	537	746	37767	0.49	1	// AT3G03190 // AT1G64660 // AT2G26550 // AT2G02930 // AT3G60100 // AT1G78360 // AT5G62480 // AT3G05630 // AT1G17180 // AT4G12100 // AT3G01420
GO:0009607	P	response to biotic stimulus	11	537	638	37767	0.3	1	// AT3G46530 // AT5G13320 // AT2G30750 // AT3G50460 // AT3G50470 // AT1G33890 // AT5G02490 // AT2G26820 // AT5G24530 // AT1G15520 // AT3G01420
GO:0019538	P	protein metabolic process	32	537	4009	37767	1	1	// AT1G44130 // AT3G01490 // AT4G02390 // AT1G61480 // AT1G80920 // AT1G67000 // AT4G19570 // AT5G02490 // AT4G10510 // AT2G07734 // AT1G44180 // AT5G24240 // AT5G47590 // AT3G28500 // AT3G61390 // AT4G12100 // AT1G67520 // AT3G12220 // AT5G59260 // AT4G04540 // AT4G11310 // AT2G18600 // AT5G36180 // AT1G26970 // AT2G07715 // AT5G22800 // AT1G21230 // AT4G28350 // AT4G11890 // AT5G49770 // AT3G12…
GO:0016051	P	carbohydrate biosynthetic process	6	537	277	37767	0.21	1	// AT1G16410 // AT1G60470 // AT1G51420 // AT2G28110 // AT3G54270 // AT1G56600
GO:0002376	P	immune system process	5	537	368	37767	0.6	1	// AT3G46530 // AT5G13320 // AT5G45000 // AT4G11340 // AT4G19925
GO:0007154	P	cell communication	6	537	1399	37767	1	1	// AT5G48850 // AT2G45130 // AT1G61480 // AT2G11810 // AT3G05630 // AT1G78000
GO:0022607	P	cellular component assembly	6	537	265	37767	0.18	1	// AT1G13370 // AT5G59690 // AT2G28720 // AT5G44610 // AT1G75600 // AT2G18050
GO:0070887	P	cellular response to chemical stimulus	8	537	452	37767	0.32	1	// AT3G16360 // AT1G70510 // AT5G13320 // AT3G15500 // AT3G23240 // AT3G56350 // AT3G24500 // AT1G67710
GO:0008152	P	metabolic process	153	537	10614	37767	0.44	1	// AT1G64660 // AT1G50090 // AT3G22100 // AT1G03650 // AT3G54270 // AT1G80920 // AT4G38780 // AT5G24530 // AT5G24240 // AT1G24320 // AT1G44180 // AT2G40740 // AT5G47590 // AT1G77570 // AT2G03760 // AT2G40340 // AT2G36770 // AT1G31050 // AT2G30660 // AT5G62480 // AT3G26610 // AT5G15830 // AT2G07741 // AT4G33880 // AT2G26550 // AT1G13300 // AT2G28110 // AT2G11810 // AT3G12220 // AT1G56600 // AT5G38…
GO:0043170	P	macromolecule metabolic process	88	537	7127	37767	0.94	1	// AT3G22100 // AT1G80920 // AT4G38780 // AT5G24240 // AT5G45990 // AT2G40740 // AT5G47590 // AT1G77570 // AT2G40340 // AT1G31050 // AT1G29860 // AT5G15830 // AT4G33880 // AT1G13300 // AT2G28110 // AT1G72350 // AT3G61630 // AT1G61480 // AT1G63210 // AT2G13960 // AT1G43640 // AT1G47655 // AT3G57645 // AT4G19570 // AT3G61390 // AT3G60490 // AT2G07734 // AT3G28500 // AT2G30350 // AT3G12220 // AT5G59…
GO:0044267	P	cellular protein metabolic process	24	537	3487	37767	1	1	// AT3G01490 // AT4G02390 // AT1G61480 // AT4G19570 // AT1G67000 // AT4G28350 // AT5G02490 // AT2G07734 // AT2G07715 // AT5G24240 // AT3G28500 // AT3G61390 // AT4G12100 // AT1G67520 // AT5G59260 // AT4G04540 // AT2G18600 // AT1G26970 // AT5G22800 // AT1G21230 // AT1G80920 // AT4G11890 // AT5G49770 // AT1G17960
GO:0044262	P	cellular carbohydrate metabolic process	5	537	417	37767	0.71	1	// AT3G54270 // AT1G16410 // AT1G51420 // AT2G28110 // AT1G47600
GO:0044260	P	cellular macromolecule metabolic process	78	537	6447	37767	0.95	1	// AT5G39810 // AT3G09230 // AT3G22100 // AT3G61630 // AT1G61480 // AT1G63210 // AT4G19570 // AT2G13960 // AT3G01490 // AT2G24700 // AT1G43640 // AT1G67000 // AT3G28500 // AT3G13210 // AT3G57645 // AT1G80920 // AT4G38780 // AT4G11890 // AT5G24240 // AT3G23240 // AT2G07715 // AT1G66730 // AT3G60490 // AT5G38740 // AT5G16600 // AT5G45990 // AT2G40740 // AT3G46080 // AT4G02390 // AT2G07734 // AT2G24…
GO:0016043	P	cellular component organization	11	537	1179	37767	0.95	1	// AT1G75750 // AT1G13370 // AT5G59690 // AT5G07650 // AT4G13890 // AT5G07760 // AT5G39630 // AT2G28720 // AT5G44610 // AT1G75600 // AT2G18050
GO:0065003	P	macromolecular complex assembly	6	537	210	37767	0.085	1	// AT1G13370 // AT5G59690 // AT2G28720 // AT5G44610 // AT1G75600 // AT2G18050
GO:0006629	P	lipid metabolic process	9	537	841	37767	0.84	1	// AT3G29430 // AT1G54010 // AT2G11810 // AT3G05630 // AT4G13300 // AT4G34930 // AT2G03760 // AT2G36800 // AT3G01420
GO:0009308	P	amine metabolic process	11	537	521	37767	0.13	1	// AT1G64660 // AT5G56080 // AT1G50090 // AT4G13890 // AT5G22800 // AT1G44180 // AT3G59890 // AT1G36370 // AT5G38200 // AT2G43820 // AT1G17960
GO:0006810	P	transport	32	537	1846	37767	0.15	1	// AT2G36950 // AT3G63380 // AT2G18180 // AT3G61450 // AT5G09720 // AT2G07671 // AT1G29100 // AT3G30842 // AT5G52350 // AT5G39630 // AT1G15170 // AT2G04050 // AT3G61630 // AT3G01760 // AT2G04070 // AT2G37870 // AT1G15520 // AT4G08620 // AT1G08100 // AT5G55470 // AT2G34940 // AT4G15160 // AT5G60800 // AT2G07741 // AT1G22990 // AT5G52680 // AT2G07707 // AT1G71140 // AT5G52700 // AT5G66970 // AT1G66…
GO:0006952	P	defense response	16	537	766	37767	0.087	1	// AT3G46530 // AT5G13320 // AT1G47890 // AT5G45090 // AT4G04220 // AT5G43570 // AT2G02120 // AT2G23960 // AT4G11340 // AT4G19925 // AT3G23240 // AT3G23120 // AT2G03760 // AT4G11210 // AT5G45000 // AT2G15220
GO:0043412	P	macromolecule modification	16	537	1636	37767	0.96	1	// AT2G18600 // AT3G01490 // AT1G27890 // AT1G61480 // AT4G02390 // AT1G26970 // AT4G11890 // AT1G21230 // AT1G67000 // AT4G04540 // AT3G61390 // AT4G28350 // AT1G67520 // AT5G24240 // AT5G49770 // AT5G59260
GO:0048731	P	system development	8	537	839	37767	0.91	1	// AT1G70510 // AT3G61630 // AT1G08100 // AT5G41410 // AT1G68765 // AT2G14210 // AT3G05630 // AT5G13080
GO:0051234	P	establishment of localization	32	537	1851	37767	0.15	1	// AT2G36950 // AT3G63380 // AT2G18180 // AT3G61450 // AT5G09720 // AT2G07671 // AT1G29100 // AT3G30842 // AT5G52350 // AT5G39630 // AT1G15170 // AT2G04050 // AT3G61630 // AT3G01760 // AT2G04070 // AT2G37870 // AT1G15520 // AT4G08620 // AT1G08100 // AT5G55470 // AT2G34940 // AT4G15160 // AT5G60800 // AT2G07741 // AT1G22990 // AT5G52680 // AT2G07707 // AT1G71140 // AT5G52700 // AT5G66970 // AT1G66…
GO:0046907	P	intracellular transport	5	537	463	37767	0.79	1	// AT5G66970 // AT3G61450 // AT3G61630 // AT5G39630 // AT2G34940
GO:0006950	P	response to stress	41	537	2320	37767	0.093	1	// AT2G02120 // AT4G11340 // AT5G64100 // AT4G13300 // AT3G24500 // AT5G43570 // AT2G38390 // AT5G02490 // AT5G45000 // AT1G66730 // AT5G48850 // AT3G23240 // AT2G30350 // AT2G03760 // AT5G10140 // AT2G41240 // AT2G40340 // AT3G02480 // AT1G47890 // AT5G45090 // AT2G15220 // AT5G13320 // AT5G13080 // AT1G05055 // AT3G23120 // AT1G78000 // AT2G18050 // AT4G11210 // AT3G01420 // AT3G46530 // AT3G03…
GO:0006519	P	cellular amino acid and derivative metabolic process	13	537	682	37767	0.18	1	// AT1G64660 // AT5G56080 // AT1G50090 // AT4G13890 // AT5G22800 // AT1G44180 // AT3G59890 // AT1G36370 // AT5G38200 // AT5G24530 // AT2G43820 // AT4G11210 // AT1G17960
GO:0016310	P	phosphorylation	16	537	1079	37767	0.47	1	// AT2G07741 // AT3G01490 // AT2G07707 // AT1G61480 // AT1G26970 // AT4G11890 // AT4G28350 // AT1G21230 // AT1G67000 // AT4G04540 // AT1G49620 // AT2G07687 // AT1G67520 // AT2G07671 // AT5G49770 // AT5G59260
GO:0006955	P	immune response	5	537	367	37767	0.6	1	// AT3G46530 // AT5G13320 // AT5G45000 // AT4G11340 // AT4G19925
GO:0009791	P	post-embryonic development	10	537	705	37767	0.55	1	// AT1G70510 // AT3G61630 // AT5G22800 // AT5G41410 // AT1G68765 // AT2G14210 // AT5G13080 // AT1G08100 // AT5G10140 // AT2G02240
GO:0044249	P	cellular biosynthetic process	69	537	4925	37767	0.57	1	// AT5G39810 // AT3G63380 // AT3G22100 // AT3G61630 // AT1G63210 // AT2G13960 // AT3G09230 // AT2G24700 // AT1G43640 // AT3G54270 // AT4G13300 // AT3G24500 // AT3G59890 // AT5G24530 // AT3G60490 // AT3G46080 // AT4G06746 // AT3G23240 // AT2G07715 // AT1G66730 // AT5G38740 // AT3G28500 // AT5G14760 // AT2G07734 // AT2G21900 // AT2G24680 // AT5G01200 // AT1G77570 // AT1G29860 // AT5G65100 // AT2G41…
GO:0009415	P	response to water	5	537	240	37767	0.26	1	// AT3G02480 // AT3G15500 // AT2G41240 // AT3G24500 // AT2G18050
GO:0009719	P	response to endogenous stimulus	16	537	1068	37767	0.45	1	// AT3G16360 // AT1G70510 // AT1G67100 // AT1G75750 // AT5G13320 // AT5G63160 // AT1G68765 // AT3G15500 // AT3G05630 // AT3G23240 // AT3G24500 // AT5G16600 // AT1G17950 // AT1G15520 // AT5G13370 // AT1G67710
GO:0009414	P	response to water deprivation	5	537	229	37767	0.23	1	// AT3G02480 // AT3G15500 // AT2G41240 // AT3G24500 // AT2G18050
GO:0006508	P	proteolysis	9	537	810	37767	0.81	1	// AT1G44130 // AT5G36180 // AT5G47590 // AT1G44180 // AT4G12100 // AT4G10510 // AT3G12220 // AT3G12230 // AT4G11310
GO:0032502	P	developmental process	24	537	2304	37767	0.96	1	// AT1G75750 // AT5G14000 // AT3G61630 // AT5G22800 // AT2G02240 // AT5G44610 // AT1G68765 // AT1G52880 // AT1G02230 // AT5G10140 // AT1G70510 // AT1G08100 // AT2G14210 // AT5G13080 // AT3G44540 // AT1G28470 // AT3G04420 // AT4G13890 // AT5G63160 // AT2G17040 // AT5G41410 // AT5G14490 // AT3G15500 // AT3G05630
GO:0032501	P	multicellular organismal process	24	537	2094	37767	0.88	1	// AT5G14000 // AT3G61630 // AT5G22800 // AT2G02240 // AT1G68765 // AT1G52880 // AT1G02230 // AT1G61480 // AT5G10140 // AT1G70510 // AT1G08100 // AT2G14210 // AT2G02950 // AT5G13080 // AT3G44540 // AT1G28470 // AT3G04420 // AT4G13890 // AT5G63160 // AT2G17040 // AT5G41410 // AT5G14490 // AT3G15500 // AT3G05630
GO:0048608	P	reproductive structure development	7	537	978	37767	0.99	1	// AT1G70510 // AT3G61630 // AT5G22800 // AT5G41410 // AT1G68765 // AT2G02240 // AT5G10140
GO:0044238	P	primary metabolic process	121	537	8995	37767	0.77	1	// AT1G64660 // AT1G50090 // AT3G22100 // AT3G54270 // AT1G80920 // AT4G38780 // AT5G24530 // AT5G24240 // AT1G24320 // AT5G45990 // AT2G40740 // AT5G47590 // AT1G77570 // AT2G03760 // AT2G40340 // AT1G31050 // AT1G29860 // AT3G26610 // AT5G15830 // AT2G07741 // AT4G33880 // AT1G13300 // AT2G28110 // AT2G11810 // AT3G12220 // AT1G56600 // AT5G38200 // AT1G36370 // AT3G61630 // AT1G61480 // AT1G63…
GO:0043687	P	post-translational protein modification	14	537	1248	37767	0.85	1	// AT2G18600 // AT3G01490 // AT4G02390 // AT1G26970 // AT1G61480 // AT1G21230 // AT1G67000 // AT4G04540 // AT3G61390 // AT4G28350 // AT1G67520 // AT4G11890 // AT5G49770 // AT5G59260
GO:0009987	P	cellular process	159	537	11684	37767	0.76	1	// AT1G75750 // AT1G64660 // AT1G50090 // AT3G22100 // AT3G61450 // AT3G54270 // AT1G80920 // AT4G38780 // AT5G24530 // AT5G24240 // AT3G30842 // AT5G07650 // AT1G44180 // AT2G40740 // AT5G26900 // AT1G15170 // AT2G28720 // AT1G77570 // AT2G40340 // AT3G16360 // AT1G31050 // AT5G62480 // AT2G34940 // AT2G02950 // AT5G15830 // AT2G07741 // AT3G46530 // AT4G33880 // AT2G26550 // AT1G27890 // AT2G45…
GO:0032870	P	cellular response to hormone stimulus	5	537	321	37767	0.48	1	// AT3G16360 // AT1G70510 // AT3G23240 // AT3G24500 // AT1G67710
GO:0044255	P	cellular lipid metabolic process	5	537	618	37767	0.94	1	// AT4G13300 // AT3G29430 // AT3G05630 // AT2G11810 // AT3G01420
GO:0006979	P	response to oxidative stress	5	537	332	37767	0.51	1	// AT3G03190 // AT3G01420 // AT2G21640 // AT3G56350 // AT5G64100
GO:0055086	P	nucleobase, nucleoside and nucleotide metabolic process	5	537	221	37767	0.21	1	// AT5G14760 // AT2G07741 // AT3G63380 // AT2G07671 // AT2G07707
GO:0042180	P	cellular ketone metabolic process	14	537	882	37767	0.38	1	// AT5G13320 // AT1G64660 // AT5G56080 // AT1G50090 // AT4G13890 // AT5G22800 // AT2G11810 // AT1G44180 // AT3G59890 // AT1G36370 // AT5G38200 // AT1G17960 // AT2G43820 // AT3G01420
GO:0033036	P	macromolecule localization	6	537	462	37767	0.64	1	// AT3G61450 // AT2G34940 // AT4G15160 // AT3G61630 // AT5G66970 // AT2G37870
GO:0006082	P	organic acid metabolic process	14	537	860	37767	0.34	1	// AT5G13320 // AT1G64660 // AT5G56080 // AT1G50090 // AT4G13890 // AT5G22800 // AT2G11810 // AT1G44180 // AT3G59890 // AT1G36370 // AT5G38200 // AT1G17960 // AT2G43820 // AT3G01420
GO:0007242	P	intracellular signaling cascade	13	537	659	37767	0.15	1	// AT3G16360 // AT1G70510 // AT3G46810 // AT5G13320 // AT3G23240 // AT1G64480 // AT3G15500 // AT2G02950 // AT3G24500 // AT4G34930 // AT2G02690 // AT3G27473 // AT1G67710
GO:0009725	P	response to hormone stimulus	15	537	982	37767	0.43	1	// AT3G16360 // AT1G70510 // AT1G67100 // AT1G75750 // AT5G13320 // AT5G63160 // AT1G68765 // AT3G05630 // AT3G23240 // AT3G24500 // AT5G16600 // AT1G17950 // AT1G15520 // AT5G13370 // AT1G67710
GO:0009723	P	response to ethylene stimulus	5	537	199	37767	0.16	1	// AT1G70510 // AT3G23240 // AT1G15520 // AT1G68765 // AT3G24500
GO:0034621	P	cellular macromolecular complex subunit organization	6	537	224	37767	0.11	1	// AT1G13370 // AT5G59690 // AT2G28720 // AT5G44610 // AT1G75600 // AT2G18050
GO:0043933	P	macromolecular complex subunit organization	6	537	235	37767	0.12	1	// AT1G13370 // AT5G59690 // AT2G28720 // AT5G44610 // AT1G75600 // AT2G18050
GO:0019752	P	carboxylic acid metabolic process	14	537	859	37767	0.34	1	// AT5G13320 // AT1G64660 // AT5G56080 // AT1G50090 // AT4G13890 // AT5G22800 // AT2G11810 // AT1G44180 // AT3G59890 // AT1G36370 // AT5G38200 // AT1G17960 // AT2G43820 // AT3G01420
GO:0034622	P	cellular macromolecular complex assembly	6	537	200	37767	0.071	1	// AT1G13370 // AT5G59690 // AT2G28720 // AT5G44610 // AT1G75600 // AT2G18050
GO:0006091	P	generation of precursor metabolites and energy	5	537	285	37767	0.38	1	// AT2G07741 // AT2G07671 // AT3G60100 // AT2G07707 // AT2G07687
GO:0007275	P	multicellular organismal development	22	537	2020	37767	0.92	1	// AT5G14000 // AT3G61630 // AT5G22800 // AT2G02240 // AT1G68765 // AT1G52880 // AT1G02230 // AT5G10140 // AT1G70510 // AT1G08100 // AT2G14210 // AT5G13080 // AT3G44540 // AT1G28470 // AT3G04420 // AT4G13890 // AT5G63160 // AT2G17040 // AT5G41410 // AT5G14490 // AT3G15500 // AT3G05630
GO:0006325	P	chromatin organization	5	537	175	37767	0.11	1	// AT2G28720 // AT2G18050 // AT1G75600 // AT5G59690 // AT1G13370
GO:0006520	P	cellular amino acid metabolic process	10	537	430	37767	0.093	1	// AT1G64660 // AT1G36370 // AT1G50090 // AT4G13890 // AT5G22800 // AT1G44180 // AT3G59890 // AT5G38200 // AT2G43820 // AT1G17960
GO:0010467	P	gene expression	55	537	3962	37767	0.6	1	// AT5G16600 // AT3G09230 // AT3G22100 // AT3G61630 // AT1G63210 // AT2G13960 // AT2G24700 // AT1G43640 // AT3G28500 // AT3G57645 // AT4G38780 // AT3G60490 // AT3G46080 // AT3G23240 // AT2G07715 // AT5G38740 // AT5G45990 // AT2G40740 // AT2G07734 // AT3G13210 // AT2G24680 // AT5G01200 // AT1G77570 // AT1G29860 // AT5G65100 // AT2G41240 // AT2G40340 // AT1G72350 // AT1G31050 // AT4G38340 // AT3G04…
GO:0006468	P	protein amino acid phosphorylation	11	537	946	37767	0.79	1	// AT3G01490 // AT1G26970 // AT1G61480 // AT1G21230 // AT1G67000 // AT4G04540 // AT4G28350 // AT1G67520 // AT4G11890 // AT5G49770 // AT5G59260
GO:0045087	P	innate immune response	5	537	347	37767	0.55	1	// AT3G46530 // AT5G13320 // AT5G45000 // AT4G11340 // AT4G19925
GO:0019748	P	secondary metabolic process	11	537	489	37767	0.096	1	// AT1G16410 // AT3G03190 // AT1G47600 // AT5G14760 // AT1G78360 // AT5G62480 // AT4G13300 // AT1G17180 // AT5G24530 // AT2G02930 // AT4G11210
GO:0006464	P	protein modification process	15	537	1474	37767	0.93	1	// AT2G18600 // AT3G01490 // AT1G61480 // AT4G02390 // AT1G26970 // AT4G11890 // AT1G21230 // AT1G67000 // AT4G04540 // AT3G61390 // AT4G28350 // AT1G67520 // AT5G24240 // AT5G49770 // AT5G59260
GO:0022414	P	reproductive process	8	537	1161	37767	0.99	1	// AT1G70510 // AT3G61630 // AT5G22800 // AT5G41410 // AT1G68765 // AT2G02240 // AT1G61480 // AT5G10140
GO:0009058	P	biosynthetic process	71	537	5118	37767	0.61	1	// AT5G39810 // AT3G63380 // AT3G22100 // AT3G61630 // AT1G63210 // AT2G13960 // AT3G09230 // AT2G24700 // AT1G43640 // AT3G54270 // AT4G13300 // AT3G24500 // AT3G59890 // AT5G24530 // AT3G60490 // AT3G46080 // AT4G06746 // AT3G23240 // AT2G07715 // AT1G66730 // AT5G38740 // AT3G28500 // AT5G14760 // AT2G07734 // AT1G60470 // AT2G24680 // AT5G01200 // AT1G77570 // AT1G29860 // AT2G28710 // AT5G65…
GO:0009059	P	macromolecule biosynthetic process	52	537	3685	37767	0.54	1	// AT1G29860 // AT5G39810 // AT3G09230 // AT3G22100 // AT3G61630 // AT1G63210 // AT2G13960 // AT2G24700 // AT1G43640 // AT1G47655 // AT3G24500 // AT3G60490 // AT3G46080 // AT2G07715 // AT1G66730 // AT5G38740 // AT3G28500 // AT2G40740 // AT2G07734 // AT2G21900 // AT2G24680 // AT5G01200 // AT1G77570 // AT1G13300 // AT5G65100 // AT2G41240 // AT2G40340 // AT1G03840 // AT1G31050 // AT4G38340 // AT3G04…
GO:0009117	P	nucleotide metabolic process	5	537	180	37767	0.12	1	// AT5G14760 // AT2G07741 // AT3G63380 // AT2G07671 // AT2G07707
GO:0051649	P	establishment of localization in cell	6	537	525	37767	0.76	1	// AT5G52350 // AT3G61450 // AT5G39630 // AT2G34940 // AT3G61630 // AT5G66970
GO:0009056	P	catabolic process	13	537	1307	37767	0.93	1	// AT3G03190 // AT1G64660 // AT2G26550 // AT2G02930 // AT3G60100 // AT1G78360 // AT5G62480 // AT2G43570 // AT3G05630 // AT1G17180 // AT4G12100 // AT2G43590 // AT3G01420
GO:0051179	P	localization	32	537	1922	37767	0.21	1	// AT2G36950 // AT3G63380 // AT2G18180 // AT3G61450 // AT5G09720 // AT2G07671 // AT1G29100 // AT3G30842 // AT5G52350 // AT5G39630 // AT1G15170 // AT2G04050 // AT3G61630 // AT3G01760 // AT2G04070 // AT2G37870 // AT1G15520 // AT4G08620 // AT1G08100 // AT5G55470 // AT2G34940 // AT4G15160 // AT5G60800 // AT2G07741 // AT1G22990 // AT5G52680 // AT2G07707 // AT1G71140 // AT5G52700 // AT5G66970 // AT1G66…
GO:0051641	P	cellular localization	6	537	569	37767	0.82	1	// AT5G52350 // AT3G61450 // AT5G39630 // AT2G34940 // AT3G61630 // AT5G66970
GO:0006996	P	organelle organization	9	537	640	37767	0.56	1	// AT1G13370 // AT5G59690 // AT5G07650 // AT4G13890 // AT5G07760 // AT2G28720 // AT5G44610 // AT1G75600 // AT2G18050
GO:0009628	P	response to abiotic stimulus	10	537	1471	37767	1	1	// AT3G02480 // AT2G38390 // AT3G15500 // AT2G02950 // AT3G24500 // AT5G02490 // AT5G10140 // AT2G18050 // AT2G41240 // AT2G40340
GO:0006753	P	nucleoside phosphate metabolic process	5	537	180	37767	0.12	1	// AT5G14760 // AT2G07741 // AT3G63380 // AT2G07671 // AT2G07707
GO:0005975	P	carbohydrate metabolic process	12	537	866	37767	0.58	1	// AT1G16410 // AT3G47050 // AT1G24320 // AT4G19720 // AT1G47600 // AT1G51420 // AT2G28110 // AT4G19750 // AT3G54270 // AT1G56600 // AT3G26610 // AT1G60470
GO:0051276	P	chromosome organization	5	537	216	37767	0.2	1	// AT2G28720 // AT2G18050 // AT1G75600 // AT5G59690 // AT1G13370
GO:0048856	P	anatomical structure development	13	537	1726	37767	1	1	// AT1G75750 // AT1G70510 // AT3G61630 // AT5G22800 // AT5G41410 // AT1G68765 // AT2G14210 // AT5G44610 // AT3G05630 // AT5G13080 // AT1G08100 // AT5G10140 // AT2G02240
GO:0044237	P	cellular metabolic process	116	537	8722	37767	0.81	1	// AT1G64660 // AT1G50090 // AT3G22100 // AT3G54270 // AT1G80920 // AT4G38780 // AT5G24530 // AT5G24240 // AT5G45990 // AT2G40740 // AT1G77570 // AT2G40340 // AT1G31050 // AT1G29860 // AT5G62480 // AT5G15830 // AT2G07741 // AT4G33880 // AT2G26550 // AT1G13300 // AT2G28110 // AT2G11810 // AT5G38200 // AT1G36370 // AT1G62180 // AT3G61630 // AT1G61480 // AT1G63210 // AT2G13960 // AT1G43640 // AT1G47…
GO:0006796	P	phosphate metabolic process	16	537	1178	37767	0.61	1	// AT2G07741 // AT3G01490 // AT2G07707 // AT1G61480 // AT1G26970 // AT4G11890 // AT4G28350 // AT1G21230 // AT1G67000 // AT4G04540 // AT1G49620 // AT2G07687 // AT1G67520 // AT2G07671 // AT5G49770 // AT5G59260
GO:0044085	P	cellular component biogenesis	7	537	571	37767	0.7	1	// AT1G13370 // AT5G59690 // AT2G28110 // AT2G28720 // AT5G44610 // AT1G75600 // AT2G18050
GO:0006790	P	sulfur metabolic process	5	537	220	37767	0.21	1	// AT1G16410 // AT5G09290 // AT1G64660 // AT1G62180 // AT1G47600
GO:0006793	P	phosphorus metabolic process	16	537	1179	37767	0.61	1	// AT2G07741 // AT3G01490 // AT2G07707 // AT1G61480 // AT1G26970 // AT4G11890 // AT4G28350 // AT1G21230 // AT1G67000 // AT4G04540 // AT1G49620 // AT2G07687 // AT1G67520 // AT2G07671 // AT5G49770 // AT5G59260
GO:0006412	P	translation	5	537	1445	37767	1	1	// AT2G07734 // AT2G07715 // AT5G22800 // AT1G17960 // AT3G28500
GO:0006396	P	RNA processing	5	537	453	37767	0.77	1	// AT5G45990 // AT3G13210 // AT4G38780 // AT3G57645 // AT1G08115
GO:0042578	F	phosphoric ester hydrolase activity	6	537	481	37767	0.68	1	// AT1G51420 // AT5G09290 // AT1G43640 // AT3G54270 // AT3G05630 // AT4G34930
GO:0060089	F	molecular transducer activity	7	537	422	37767	0.4	1	// AT3G16360 // AT5G26900 // AT5G39630 // AT4G11340 // AT4G19925 // AT5G45000 // AT1G67710
GO:0016746	F	transferase activity, transferring acyl groups	7	537	324	37767	0.19	1	// AT5G47950 // AT3G60100 // AT1G03650 // AT3G29670 // AT1G67220 // AT5G39090 // AT5G42830
GO:0016747	F	transferase activity, transferring acyl groups other than amino-acyl groups	6	537	290	37767	0.24	1	// AT5G47950 // AT1G03650 // AT3G29670 // AT1G67220 // AT5G39090 // AT5G42830
GO:0046914	F	transition metal ion binding	29	537	1618	37767	0.12	1	// AT5G39130 // AT5G38910 // AT5G39110 // AT5G64100 // AT2G38390 // AT3G27473 // AT3G46080 // AT5G49200 // AT1G29100 // AT1G08500 // AT5G07060 // AT5G49665 // AT3G46810 // AT1G03840 // AT2G26130 // AT4G01350 // AT5G39120 // AT3G46070 // AT2G02690 // AT5G60250 // AT2G19610 // AT1G74870 // AT5G56200 // AT4G09110 // AT2G35910 // AT2G28710 // AT1G49900 // AT5G57920 // AT2G22680
GO:0030554	F	adenyl nucleotide binding	22	537	1465	37767	0.43	1	// AT1G61480 // AT1G67000 // AT4G28350 // AT5G02490 // AT1G43910 // AT1G66730 // AT1G26410 // AT3G28540 // AT1G26380 // AT1G67520 // AT2G18193 // AT5G59260 // AT2G18600 // AT5G40010 // AT4G16680 // AT1G26390 // AT1G26420 // AT1G26970 // AT3G28510 // AT4G11890 // AT5G49770 // AT1G17960
GO:0016874	F	ligase activity	7	537	564	37767	0.69	1	// AT2G18600 // AT1G66730 // AT1G36180 // AT3G61390 // AT5G49665 // AT2G22680 // AT1G17960
GO:0008270	F	zinc ion binding	20	537	1299	37767	0.39	1	// AT1G74870 // AT2G26130 // AT3G46810 // AT2G19610 // AT4G01350 // AT2G22680 // AT4G09110 // AT3G46070 // AT5G56200 // AT5G07060 // AT2G35910 // AT5G49665 // AT2G28710 // AT2G02690 // AT5G60250 // AT1G49900 // AT3G27473 // AT3G46080 // AT1G03840 // AT5G49200
GO:0008168	F	methyltransferase activity	6	537	273	37767	0.2	1	// AT1G36370 // AT4G13890 // AT1G66700 // AT2G43920 // AT3G22740 // AT5G38100
GO:0017076	F	purine nucleotide binding	27	537	1713	37767	0.32	1	// AT1G61480 // AT1G67000 // AT4G28350 // AT5G02490 // AT1G43910 // AT1G66730 // AT1G60500 // AT5G25230 // AT1G26410 // AT3G28540 // AT1G26380 // AT1G67520 // AT2G18193 // AT5G59260 // AT2G18600 // AT1G02430 // AT5G40010 // AT4G16680 // AT1G26390 // AT1G26420 // AT1G26970 // AT1G33890 // AT3G28510 // AT5G66970 // AT4G11890 // AT5G49770 // AT1G17960
GO:0005524	F	ATP binding	18	537	1377	37767	0.67	1	// AT2G18600 // AT1G66730 // AT1G43910 // AT4G16680 // AT1G26970 // AT1G61480 // AT4G28350 // AT3G28540 // AT1G67000 // AT3G28510 // AT5G40010 // AT1G67520 // AT5G02490 // AT2G18193 // AT4G11890 // AT5G49770 // AT5G59260 // AT1G17960
GO:0005525	F	GTP binding	5	537	249	37767	0.29	1	// AT5G66970 // AT1G60500 // AT1G02430 // AT5G25230 // AT1G33890
GO:0016787	F	hydrolase activity	56	537	3468	37767	0.18	1	// AT1G44130 // AT1G24320 // AT3G63380 // AT4G34930 // AT1G63210 // AT1G43640 // AT3G54270 // AT5G06570 // AT4G01970 // AT4G10510 // AT4G19750 // AT2G07671 // AT3G03500 // AT3G47050 // AT3G12220 // AT1G60500 // AT1G27890 // AT5G25230 // AT1G44180 // AT3G13080 // AT3G28540 // AT5G47590 // AT1G51470 // AT1G54010 // AT2G30350 // AT4G11310 // AT3G60970 // AT2G18193 // AT1G15520 // AT2G39400 // AT2G43…
GO:0016301	F	kinase activity	17	537	1641	37767	0.93	1	// AT3G16360 // AT1G47890 // AT4G04220 // AT1G26970 // AT4G11890 // AT3G01490 // AT1G21230 // AT1G67000 // AT4G04540 // AT1G61480 // AT2G23030 // AT3G23120 // AT4G28350 // AT1G67520 // AT5G24240 // AT5G49770 // AT5G59260
GO:0016788	F	hydrolase activity, acting on ester bonds	13	537	1200	37767	0.87	1	// AT5G09290 // AT2G31425 // AT1G53990 // AT1G51420 // AT1G63210 // AT3G05630 // AT1G43640 // AT3G54270 // AT1G54010 // AT2G30350 // AT4G34930 // AT1G27890 // AT3G03500
GO:0022890	F	inorganic cation transmembrane transporter activity	6	537	228	37767	0.11	1	// AT3G63380 // AT2G07707 // AT2G07671 // AT5G55470 // AT2G07687 // AT2G07741
GO:0022892	F	substrate-specific transporter activity	19	537	1059	37767	0.18	1	// AT3G63380 // AT5G55470 // AT4G08620 // AT1G22150 // AT1G77990 // AT5G19600 // AT2G07741 // AT1G78000 // AT1G08100 // AT5G09720 // AT3G61450 // AT3G13080 // AT1G79410 // AT5G43360 // AT2G07687 // AT3G01760 // AT2G07671 // AT2G46430 // AT2G07707
GO:0016773	F	phosphotransferase activity, alcohol group as acceptor	11	537	1154	37767	0.94	1	// AT3G01490 // AT1G26970 // AT4G11890 // AT1G21230 // AT1G67000 // AT1G61480 // AT4G28350 // AT1G67520 // AT5G24240 // AT5G49770 // AT5G59260
GO:0016772	F	transferase activity, transferring phosphorus-containing groups	18	537	1887	37767	0.97	1	// AT3G16360 // AT1G47890 // AT4G04220 // AT1G26970 // AT4G11890 // AT2G40520 // AT3G01490 // AT1G21230 // AT1G67000 // AT4G04540 // AT1G61480 // AT2G23030 // AT3G23120 // AT4G28350 // AT1G67520 // AT5G24240 // AT5G49770 // AT5G59260
GO:0032555	F	purine ribonucleotide binding	23	537	1631	37767	0.55	1	// AT1G61480 // AT1G67000 // AT4G28350 // AT5G02490 // AT1G43910 // AT1G66730 // AT1G60500 // AT5G25230 // AT3G28540 // AT1G67520 // AT2G18193 // AT5G59260 // AT1G02430 // AT5G40010 // AT4G16680 // AT2G18600 // AT1G26970 // AT1G33890 // AT3G28510 // AT5G66970 // AT4G11890 // AT5G49770 // AT1G17960
GO:0032553	F	ribonucleotide binding	23	537	1631	37767	0.55	1	// AT1G61480 // AT1G67000 // AT4G28350 // AT5G02490 // AT1G43910 // AT1G66730 // AT1G60500 // AT5G25230 // AT3G28540 // AT1G67520 // AT2G18193 // AT5G59260 // AT1G02430 // AT5G40010 // AT4G16680 // AT2G18600 // AT1G26970 // AT1G33890 // AT3G28510 // AT5G66970 // AT4G11890 // AT5G49770 // AT1G17960
GO:0016798	F	hydrolase activity, acting on glycosyl bonds	11	537	526	37767	0.14	1	// AT3G47050 // AT1G24320 // AT1G51470 // AT4G19720 // AT1G47600 // AT4G19750 // AT2G43570 // AT3G26610 // AT4G01970 // AT3G60120 // AT2G43590
GO:0008233	F	peptidase activity	8	537	646	37767	0.7	1	// AT1G44130 // AT5G36180 // AT5G47590 // AT1G44180 // AT4G10510 // AT3G12220 // AT3G12230 // AT4G11310
GO:0000166	F	nucleotide binding	30	537	2267	37767	0.68	1	// AT1G61480 // AT3G48840 // AT1G67000 // AT4G28350 // AT5G02490 // AT1G43910 // AT1G66730 // AT1G60500 // AT5G25230 // AT1G26410 // AT3G28540 // AT1G26380 // AT1G67520 // AT2G18193 // AT5G59260 // AT2G18600 // AT5G03495 // AT1G02430 // AT5G40010 // AT4G16680 // AT1G26390 // AT1G26420 // AT1G26970 // AT1G33890 // AT3G28510 // AT2G46430 // AT5G66970 // AT4G11890 // AT5G49770 // AT1G17960
GO:0032561	F	guanyl ribonucleotide binding	5	537	249	37767	0.29	1	// AT5G66970 // AT1G60500 // AT1G02430 // AT5G25230 // AT1G33890
GO:0016741	F	transferase activity, transferring one-carbon groups	6	537	275	37767	0.2	1	// AT1G36370 // AT4G13890 // AT1G66700 // AT2G43920 // AT3G22740 // AT5G38100
GO:0005509	F	calcium ion binding	5	537	215	37767	0.2	1	// AT4G26560 // AT1G64480 // AT2G34940 // AT5G44460 // AT3G47480
GO:0022891	F	substrate-specific transmembrane transporter activity	18	537	908	37767	0.1	1	// AT3G63380 // AT5G55470 // AT4G08620 // AT1G22150 // AT5G19600 // AT2G07741 // AT1G78000 // AT1G08100 // AT5G09720 // AT1G77990 // AT3G13080 // AT1G79410 // AT5G43360 // AT2G07687 // AT3G01760 // AT2G07671 // AT2G46430 // AT2G07707
GO:0005515	F	protein binding	36	537	2944	37767	0.85	1	// AT3G63380 // AT1G63210 // AT5G44610 // AT3G24500 // AT4G19570 // AT4G10510 // AT3G27473 // AT2G19960 // AT5G07650 // AT5G52350 // AT5G39630 // AT1G67220 // AT5G49665 // AT4G12100 // AT3G46810 // AT1G03840 // AT1G47890 // AT4G01350 // AT2G02950 // AT3G23120 // AT2G02690 // AT5G60250 // AT2G19610 // AT1G74870 // AT4G04220 // AT5G63160 // AT5G41410 // AT1G68765 // AT5G49770 // AT4G09110 // AT5G07…
GO:0003676	F	nucleic acid binding	77	537	4842	37767	0.16	1	// AT5G14000 // AT1G13370 // AT5G49200 // AT3G22100 // AT3G61630 // AT1G63210 // AT2G13960 // AT3G09230 // AT2G24700 // AT1G43640 // AT1G47655 // AT3G24500 // AT2G18050 // AT3G60490 // AT3G46080 // AT3G23240 // AT1G67710 // AT1G66730 // AT5G59690 // AT5G38740 // AT5G25230 // AT5G39810 // AT2G40740 // AT1G02230 // AT2G21900 // AT1G77570 // AT2G07734 // AT2G24680 // AT2G28720 // AT5G01200 // AT1G75…
GO:0001883	F	purine nucleoside binding	22	537	1465	37767	0.43	1	// AT1G61480 // AT1G67000 // AT4G28350 // AT5G02490 // AT1G43910 // AT1G66730 // AT1G26410 // AT3G28540 // AT1G26380 // AT1G67520 // AT2G18193 // AT5G59260 // AT2G18600 // AT5G40010 // AT4G16680 // AT1G26390 // AT1G26420 // AT1G26970 // AT3G28510 // AT4G11890 // AT5G49770 // AT1G17960
GO:0001882	F	nucleoside binding	22	537	1465	37767	0.43	1	// AT1G61480 // AT1G67000 // AT4G28350 // AT5G02490 // AT1G43910 // AT1G66730 // AT1G26410 // AT3G28540 // AT1G26380 // AT1G67520 // AT2G18193 // AT5G59260 // AT2G18600 // AT5G40010 // AT4G16680 // AT1G26390 // AT1G26420 // AT1G26970 // AT3G28510 // AT4G11890 // AT5G49770 // AT1G17960
GO:0050662	F	coenzyme binding	5	537	191	37767	0.14	1	// AT1G26390 // AT5G01320 // AT1G26380 // AT1G26420 // AT1G26410
GO:0019001	F	guanyl nucleotide binding	5	537	249	37767	0.29	1	// AT5G66970 // AT1G60500 // AT1G02430 // AT5G25230 // AT1G33890
GO:0005198	F	structural molecule activity	6	537	659	37767	0.91	1	// AT2G07715 // AT4G15160 // AT3G28500 // AT1G26240 // AT3G19430 // AT2G07734
GO:0004674	F	protein serine/threonine kinase activity	9	537	681	37767	0.63	1	// AT1G26970 // AT1G61480 // AT1G21230 // AT1G67000 // AT4G28350 // AT1G67520 // AT4G11890 // AT5G49770 // AT5G59260
GO:0070011	F	peptidase activity, acting on L-amino acid peptides	8	537	579	37767	0.58	1	// AT1G44130 // AT5G36180 // AT5G47590 // AT1G44180 // AT4G10510 // AT3G12220 // AT3G12230 // AT4G11310
GO:0004672	F	protein kinase activity	10	537	953	37767	0.87	1	// AT3G01490 // AT1G26970 // AT1G61480 // AT1G21230 // AT1G67000 // AT4G28350 // AT1G67520 // AT4G11890 // AT5G49770 // AT5G59260
GO:0032559	F	adenyl ribonucleotide binding	18	537	1384	37767	0.68	1	// AT2G18600 // AT1G66730 // AT1G43910 // AT4G16680 // AT1G26970 // AT1G61480 // AT4G28350 // AT3G28540 // AT1G67000 // AT3G28510 // AT5G40010 // AT1G67520 // AT5G02490 // AT2G18193 // AT4G11890 // AT5G49770 // AT5G59260 // AT1G17960
GO:0008324	F	cation transmembrane transporter activity	9	537	503	37767	0.29	1	// AT3G63380 // AT2G07707 // AT2G07741 // AT5G55470 // AT5G09720 // AT1G79410 // AT5G43360 // AT2G07687 // AT2G07671
GO:0004871	F	signal transducer activity	7	537	422	37767	0.4	1	// AT3G16360 // AT5G26900 // AT5G39630 // AT4G11340 // AT4G19925 // AT5G45000 // AT1G67710
GO:0048037	F	cofactor binding	5	537	246	37767	0.28	1	// AT1G26390 // AT5G01320 // AT1G26380 // AT1G26420 // AT1G26410
GO:0044444	C	cytoplasmic part	47	537	6289	37767	1	1	// AT1G13370 // AT5G66670 // AT2G21640 // AT2G13960 // AT1G64660 // AT5G52350 // AT4G21840 // AT3G56350 // AT5G02490 // AT3G60490 // AT5G24240 // AT3G47050 // AT1G66730 // AT5G07650 // AT5G07760 // AT2G37240 // AT5G14760 // AT2G07734 // AT3G13080 // AT1G15170 // AT3G28500 // AT1G54010 // AT3G59890 // AT4G04830 // AT4G37370 // AT1G51100 // AT1G16410 // AT3G51500 // AT2G34940 // AT2G07715 // AT2G07…
GO:0030529	C	ribonucleoprotein complex	7	537	703	37767	0.87	1	// AT2G07715 // AT1G08115 // AT3G28500 // AT3G57645 // AT5G66970 // AT4G38780 // AT2G07734
GO:0005773	C	vacuole	5	537	383	37767	0.64	1	// AT3G47050 // AT1G54010 // AT4G14630 // AT3G13080 // AT2G07707
GO:0009507	C	chloroplast	18	537	2740	37767	1	1	// AT3G51500 // AT1G13370 // AT5G07650 // AT5G07760 // AT2G37240 // AT5G14760 // AT2G13960 // AT5G66670 // AT5G22800 // AT5G03390 // AT1G15170 // AT1G26970 // AT3G59890 // AT2G11810 // AT4G37710 // AT3G60490 // AT1G66730 // AT1G51100
GO:0043231	C	intracellular membrane-bounded organelle	70	537	7615	37767	1	1	// AT3G16360 // AT1G13370 // AT1G77570 // AT3G60100 // AT3G22100 // AT3G61630 // AT2G21640 // AT5G66670 // AT2G13960 // AT1G08115 // AT4G33880 // AT3G57645 // AT4G38780 // AT3G60490 // AT5G24240 // AT5G63160 // AT3G47050 // AT1G66730 // AT5G07650 // AT5G07760 // AT5G25230 // AT2G37240 // AT5G14760 // AT4G02390 // AT1G54010 // AT1G15170 // AT2G28720 // AT1G75600 // AT3G59890 // AT4G37370 // AT1G17…
GO:0043234	C	protein complex	9	537	1443	37767	1	1	// AT2G07741 // AT5G52350 // AT5G26900 // AT2G34940 // AT3G61390 // AT1G05055 // AT4G12100 // AT5G10140 // AT2G07671
GO:0044428	C	nuclear part	6	537	543	37767	0.78	1	// AT5G25230 // AT1G08115 // AT3G57645 // AT3G24500 // AT4G38780 // AT1G05055
GO:0044424	C	intracellular part	93	537	9302	37767	1	1	// AT1G64660 // AT3G22100 // AT4G21840 // AT4G38780 // AT5G24240 // AT5G07650 // AT5G25230 // AT2G37240 // AT3G13080 // AT1G15170 // AT2G28720 // AT1G77570 // AT2G40340 // AT3G16360 // AT1G31050 // AT5G62480 // AT2G34940 // AT2G02950 // AT2G07741 // AT3G46530 // AT4G33880 // AT1G07180 // AT2G28110 // AT2G21640 // AT2G11810 // AT3G23190 // AT4G37710 // AT3G61630 // AT5G41410 // AT2G13960 // AT3G57…
GO:0044422	C	organelle part	18	537	2562	37767	1	1	// AT1G13370 // AT1G07180 // AT5G25230 // AT2G07715 // AT2G34940 // AT2G11810 // AT1G08115 // AT2G28720 // AT1G75600 // AT3G13080 // AT3G57645 // AT1G05055 // AT2G18050 // AT4G38780 // AT1G61050 // AT1G51100 // AT2G07734 // AT3G24500
GO:0005829	C	cytosol	5	537	912	37767	1	1	// AT4G04830 // AT4G21840 // AT1G64660 // AT5G41410 // AT5G02490
GO:0044464	C	cell part	207	537	15217	37767	0.81	1	// AT3G48640 // AT1G75750 // AT1G64660 // AT2G07719 // AT3G47480 // AT3G61450 // AT5G39110 // AT5G64100 // AT2G07739 // AT4G21840 // AT4G05018 // AT4G38780 // AT5G24240 // AT3G03500 // AT2G36724 // AT1G52070 // AT5G07650 // AT5G25230 // AT2G37240 // AT5G26900 // AT1G52100 // AT3G22100 // AT4G33710 // AT3G13080 // AT1G15170 // AT1G26380 // AT5G13170 // AT1G54010 // AT1G33640 // AT2G37870 // AT3G16…
GO:0043229	C	intracellular organelle	73	537	8149	37767	1	1	// AT3G16360 // AT1G13370 // AT1G77570 // AT3G60100 // AT3G22100 // AT3G61630 // AT2G21640 // AT5G66670 // AT2G13960 // AT1G08115 // AT4G33880 // AT3G57645 // AT2G07667 // AT4G38780 // AT3G60490 // AT5G24240 // AT5G63160 // AT3G47050 // AT1G66730 // AT5G07650 // AT5G07760 // AT5G25230 // AT2G37240 // AT5G14760 // AT2G07734 // AT4G02390 // AT1G54010 // AT1G15170 // AT2G28720 // AT3G28500 // AT1G75…
GO:0043227	C	membrane-bounded organelle	70	537	7622	37767	1	1	// AT3G16360 // AT1G13370 // AT1G77570 // AT3G60100 // AT3G22100 // AT3G61630 // AT2G21640 // AT5G66670 // AT2G13960 // AT1G08115 // AT4G33880 // AT3G57645 // AT4G38780 // AT3G60490 // AT5G24240 // AT5G63160 // AT3G47050 // AT1G66730 // AT5G07650 // AT5G07760 // AT5G25230 // AT2G37240 // AT5G14760 // AT4G02390 // AT1G54010 // AT1G15170 // AT2G28720 // AT1G75600 // AT3G59890 // AT4G37370 // AT1G17…
GO:0005886	C	plasma membrane	19	537	1456	37767	0.68	1	// AT5G25754 // AT5G55490 // AT4G14630 // AT4G08620 // AT5G49665 // AT5G26900 // AT2G34940 // AT1G21230 // AT4G12735 // AT3G28500 // AT1G54010 // AT2G02950 // AT5G41290 // AT4G28350 // AT5G02490 // AT2G04040 // AT1G15520 // AT1G63580 // AT1G71140
GO:0031225	C	anchored to membrane	5	537	272	37767	0.35	1	// AT5G26300 // AT5G41300 // AT5G41290 // AT1G63580 // AT1G08500
GO:0016020	C	membrane	48	537	4068	37767	0.93	1	// AT3G63380 // AT3G61450 // AT4G11340 // AT5G09720 // AT1G71140 // AT5G43360 // AT2G11810 // AT4G28350 // AT5G02490 // AT5G45000 // AT2G07671 // AT2G04050 // AT5G26900 // AT1G52100 // AT5G39630 // AT1G08500 // AT1G15170 // AT5G13170 // AT3G28500 // AT1G54010 // AT5G26300 // AT3G01760 // AT2G32740 // AT5G49665 // AT2G04070 // AT4G12735 // AT5G55490 // AT4G08620 // AT4G11655 // AT2G34940 // AT1G79…
GO:0031224	C	intrinsic to membrane	11	537	806	37767	0.6	1	// AT5G55490 // AT1G07180 // AT3G61450 // AT4G11340 // AT2G34940 // AT1G08500 // AT5G26300 // AT5G41300 // AT5G41290 // AT5G45000 // AT1G63580
GO:0005634	C	nucleus	34	537	2621	37767	0.73	1	// AT5G16600 // AT1G13370 // AT3G22100 // AT3G61630 // AT1G08115 // AT3G24500 // AT4G38780 // AT3G60490 // AT5G38740 // AT5G25230 // AT5G39810 // AT4G02390 // AT1G75600 // AT2G28720 // AT1G77570 // AT3G23240 // AT1G17950 // AT2G40340 // AT1G03840 // AT3G16360 // AT1G31050 // AT4G33880 // AT5G13080 // AT1G05055 // AT1G27890 // AT4G06746 // AT1G28470 // AT1G24210 // AT5G63160 // AT5G41410 // AT1G72…
GO:0005739	C	mitochondrion	9	537	1276	37767	0.99	1	// AT1G07180 // AT2G07707 // AT2G07715 // AT5G22800 // AT2G21640 // AT3G60100 // AT3G56350 // AT2G15620 // AT2G07667
GO:0043232	C	intracellular non-membrane-bounded organelle	9	537	1040	37767	0.96	1	// AT1G13370 // AT5G25230 // AT2G07715 // AT2G28720 // AT3G28500 // AT1G75600 // AT3G24500 // AT2G18050 // AT2G07734
GO:0030312	C	external encapsulating structure	6	537	407	37767	0.52	1	// AT1G44130 // AT1G75750 // AT5G64100 // AT2G43570 // AT5G02490 // AT4G11310
GO:0032991	C	macromolecular complex	20	537	2180	37767	0.99	1	// AT2G07741 // AT1G13370 // AT5G52350 // AT5G26900 // AT3G28500 // AT2G07671 // AT4G12100 // AT2G34940 // AT1G08115 // AT2G28720 // AT5G66970 // AT1G75600 // AT3G61390 // AT3G57645 // AT1G05055 // AT2G18050 // AT5G10140 // AT4G38780 // AT2G07734 // AT2G07715
GO:0005622	C	intracellular	103	537	9671	37767	1	1	// AT1G64660 // AT3G22100 // AT4G21840 // AT4G38780 // AT5G24240 // AT5G07650 // AT5G25230 // AT2G37240 // AT3G13080 // AT1G15170 // AT2G28720 // AT1G77570 // AT2G40340 // AT3G16360 // AT1G31050 // AT5G62480 // AT2G34940 // AT2G42330 // AT2G07741 // AT3G46530 // AT4G33880 // AT1G07180 // AT1G27890 // AT2G28110 // AT2G21640 // AT2G11810 // AT3G23190 // AT4G37710 // AT1G49900 // AT2G07734 // AT3G61…
GO:0005623	C	cell	207	537	15217	37767	0.81	1	// AT3G48640 // AT1G75750 // AT1G64660 // AT2G07719 // AT3G47480 // AT3G61450 // AT5G39110 // AT5G64100 // AT2G07739 // AT4G21840 // AT4G05018 // AT4G38780 // AT5G24240 // AT3G03500 // AT2G36724 // AT1G52070 // AT5G07650 // AT5G25230 // AT2G37240 // AT5G26900 // AT1G52100 // AT3G22100 // AT4G33710 // AT3G13080 // AT1G15170 // AT1G26380 // AT5G13170 // AT1G54010 // AT1G33640 // AT2G37870 // AT3G16…
GO:0043228	C	non-membrane-bounded organelle	9	537	1040	37767	0.96	1	// AT1G13370 // AT5G25230 // AT2G07715 // AT2G28720 // AT3G28500 // AT1G75600 // AT3G24500 // AT2G18050 // AT2G07734
GO:0048046	C	apoplast	6	537	182	37767	0.05	1	// AT5G39130 // AT5G38910 // AT5G39110 // AT1G68765 // AT5G39120 // AT2G43570
GO:0009536	C	plastid	18	537	2965	37767	1	1	// AT3G51500 // AT1G13370 // AT5G07650 // AT5G07760 // AT2G37240 // AT5G14760 // AT2G13960 // AT5G66670 // AT5G22800 // AT5G03390 // AT1G15170 // AT1G26970 // AT3G59890 // AT2G11810 // AT4G37710 // AT3G60490 // AT1G66730 // AT1G51100
GO:0044425	C	membrane part	14	537	1360	37767	0.92	1	// AT2G07741 // AT5G55490 // AT1G07180 // AT3G61450 // AT5G26900 // AT4G11340 // AT2G34940 // AT1G08500 // AT5G26300 // AT5G41300 // AT5G41290 // AT5G45000 // AT2G07671 // AT1G63580
GO:0044446	C	intracellular organelle part	18	537	2561	37767	1	1	// AT1G13370 // AT1G07180 // AT5G25230 // AT2G07715 // AT2G34940 // AT2G11810 // AT1G08115 // AT2G28720 // AT1G75600 // AT3G13080 // AT3G57645 // AT1G05055 // AT2G18050 // AT4G38780 // AT1G61050 // AT1G51100 // AT2G07734 // AT3G24500
GO:0005737	C	cytoplasm	58	537	6822	37767	1	1	// AT3G16360 // AT1G13370 // AT5G66670 // AT5G41410 // AT2G13960 // AT1G64660 // AT3G28500 // AT5G52350 // AT4G21840 // AT3G56350 // AT5G02490 // AT3G60490 // AT5G24240 // AT3G47050 // AT1G66730 // AT5G07650 // AT5G07760 // AT2G37240 // AT5G14760 // AT2G07734 // AT3G13080 // AT1G15170 // AT1G44180 // AT1G54010 // AT3G59890 // AT4G04830 // AT4G37370 // AT1G51100 // AT1G16410 // AT3G51500 // AT2G02…
GO:0005618	C	cell wall	6	537	403	37767	0.51	1	// AT1G44130 // AT1G75750 // AT5G64100 // AT2G43570 // AT5G02490 // AT4G11310
GO:0043226	C	organelle	73	537	8155	37767	1	1	// AT3G16360 // AT1G13370 // AT1G77570 // AT3G60100 // AT3G22100 // AT3G61630 // AT2G21640 // AT5G66670 // AT2G13960 // AT1G08115 // AT4G33880 // AT3G57645 // AT2G07667 // AT4G38780 // AT3G60490 // AT5G24240 // AT5G63160 // AT3G47050 // AT1G66730 // AT5G07650 // AT5G07760 // AT5G25230 // AT2G37240 // AT5G14760 // AT2G07734 // AT4G02390 // AT1G54010 // AT1G15170 // AT2G28720 // AT3G28500 // AT1G75…

## Sheet: up20vsWT
GO terms derived from genes significantly induced in med20 versus Col-0
GO_acc	term_type	Term	queryitem	querytotal	bgitem	bgtotal	pvalue	FDR	entries
GO:0009408	P	response to heat	20	787	161	37767	1.1e-09	1.3e-06	// AT2G29500 // AT2G26150 // AT1G52560 // AT4G10250 // AT4G12400 // AT3G46230 // AT2G22240 // AT1G54050 // AT3G09440 // AT1G59860 // AT5G15450 // AT5G37670 // AT5G05410 // AT3G24500 // AT2G19310 // AT5G02490 // AT1G74310 // AT2G40340 // AT1G53540 // AT2G46240
GO:0000302	P	response to reactive oxygen species	12	787	85	37767	7e-07	0.00016	// AT2G29500 // AT2G19310 // AT1G52560 // AT4G12400 // AT2G22240 // AT1G54050 // AT1G74310 // AT2G26150 // AT5G05410 // AT3G56350 // AT4G02380 // AT2G46240
GO:0042542	P	response to hydrogen peroxide	10	787	53	37767	5.7e-07	0.00016	// AT2G29500 // AT1G52560 // AT4G12400 // AT2G22240 // AT1G54050 // AT1G74310 // AT2G26150 // AT5G05410 // AT2G19310 // AT2G46240
GO:0006950	P	response to stress	85	787	2320	37767	6.5e-07	0.00016	// AT1G73260 // AT2G17430 // AT5G04230 // AT1G52560 // AT2G02120 // AT3G46230 // AT4G11340 // AT3G09440 // AT5G64100 // AT5G16960 // AT5G43570 // AT1G55920 // AT3G23010 // AT1G02450 // AT2G38390 // AT5G02490 // AT5G45000 // AT1G53540 // AT3G24500 // AT1G66730 // AT2G29500 // AT1G10170 // AT1G51270 // AT5G48850 // AT3G04210 // AT5G43580 // AT1G54050 // AT3G10020 // AT5G15450 // AT4G12480 // AT3G23…
GO:0050896	P	response to stimulus	132	787	4057	37767	2.9e-07	0.00016	// AT1G75750 // AT2G17430 // AT3G04210 // AT3G46230 // AT5G64100 // AT4G35900 // AT4G18450 // AT5G24530 // AT5G13370 // AT3G30842 // AT4G35770 // AT5G43580 // AT3G50460 // AT1G15170 // AT1G51270 // AT5G39610 // AT2G26150 // AT2G03760 // AT2G40340 // AT3G16360 // AT5G43570 // AT1G05010 // AT2G22240 // AT2G14210 // AT3G57300 // AT2G02950 // AT3G21780 // AT3G46530 // AT1G52200 // AT2G45130 // AT2G21…
GO:0006979	P	response to oxidative stress	23	787	332	37767	1.4e-06	0.00027	// AT1G52560 // AT5G64100 // AT5G16960 // AT2G19310 // AT2G29500 // AT4G35770 // AT1G54050 // AT2G29450 // AT4G02380 // AT3G01420 // AT1G02930 // AT5G39610 // AT1G13340 // AT4G12400 // AT2G22240 // AT1G74310 // AT2G26150 // AT2G46240 // AT1G52200 // AT2G21640 // AT3G10020 // AT5G05410 // AT3G56350
GO:0030528	F	transcription regulator activity	87	787	2417	37767	9.5e-07	0.00027	// AT5G14000 // AT1G30650 // AT4G35900 // AT4G18450 // AT2G40740 // AT1G77570 // AT5G39610 // AT2G40340 // AT5G59710 // AT1G31050 // AT1G29860 // AT2G14210 // AT2G26150 // AT3G10040 // AT5G15830 // AT2G28700 // AT4G33880 // AT1G13300 // AT5G41410 // AT3G50260 // AT3G06220 // AT1G49900 // AT3G61630 // AT2G36890 // AT1G63210 // AT2G13960 // AT1G43640 // AT3G24500 // AT3G60490 // AT3G12730 // AT5G10…
GO:0003700	F	transcription factor activity	81	787	2173	37767	6.3e-07	0.00027	// AT2G46310 // AT3G09230 // AT2G38340 // AT5G14000 // AT5G41090 // AT2G36890 // AT3G46070 // AT2G13960 // AT1G30650 // AT2G24700 // AT1G43640 // AT3G09290 // AT5G22890 // AT3G24500 // AT5G04150 // AT3G60490 // AT3G46080 // AT3G23240 // AT1G67710 // AT5G61590 // AT1G10170 // AT5G39810 // AT3G49760 // AT1G02230 // AT1G17950 // AT3G29035 // AT5G56200 // AT4G33880 // AT2G24680 // AT5G01200 // AT1G77…
GO:0009889	P	regulation of biosynthetic process	70	787	1881	37767	4e-06	0.00046	// AT2G46310 // AT3G09230 // AT5G16600 // AT3G61630 // AT2G36890 // AT1G63210 // AT3G46070 // AT2G13960 // AT1G30650 // AT2G24700 // AT1G43640 // AT3G09290 // AT5G22890 // AT1G55110 // AT5G04150 // AT4G18300 // AT3G60490 // AT3G46080 // AT3G23240 // AT5G42750 // AT5G61590 // AT3G12730 // AT5G39810 // AT3G02400 // AT2G21900 // AT2G24680 // AT5G01200 // AT1G77570 // AT1G29860 // AT2G19810 // AT1G68…
GO:0010556	P	regulation of macromolecule biosynthetic process	69	787	1843	37767	3.9e-06	0.00046	// AT2G46310 // AT3G09230 // AT5G16600 // AT3G61630 // AT2G36890 // AT1G63210 // AT3G46070 // AT2G13960 // AT1G30650 // AT2G24700 // AT1G43640 // AT3G09290 // AT5G22890 // AT1G55110 // AT5G04150 // AT4G18300 // AT3G60490 // AT3G46080 // AT3G23240 // AT5G61590 // AT3G12730 // AT5G39810 // AT3G02400 // AT2G21900 // AT2G24680 // AT5G01200 // AT1G77570 // AT1G29860 // AT2G19810 // AT1G68670 // AT3G16…
GO:0031326	P	regulation of cellular biosynthetic process	70	787	1881	37767	4e-06	0.00046	// AT2G46310 // AT3G09230 // AT5G16600 // AT3G61630 // AT2G36890 // AT1G63210 // AT3G46070 // AT2G13960 // AT1G30650 // AT2G24700 // AT1G43640 // AT3G09290 // AT5G22890 // AT1G55110 // AT5G04150 // AT4G18300 // AT3G60490 // AT3G46080 // AT3G23240 // AT5G42750 // AT5G61590 // AT3G12730 // AT5G39810 // AT3G02400 // AT2G21900 // AT2G24680 // AT5G01200 // AT1G77570 // AT1G29860 // AT2G19810 // AT1G68…
GO:0045449	P	regulation of transcription	68	787	1802	37767	3.6e-06	0.00046	// AT2G46310 // AT3G09230 // AT5G16600 // AT3G61630 // AT2G36890 // AT1G63210 // AT3G46070 // AT2G13960 // AT1G30650 // AT2G24700 // AT1G43640 // AT3G09290 // AT5G22890 // AT1G55110 // AT5G04150 // AT1G02450 // AT3G60490 // AT3G46080 // AT3G23240 // AT5G61590 // AT3G12730 // AT5G39810 // AT3G02400 // AT2G21900 // AT2G24680 // AT5G01200 // AT1G77570 // AT1G29860 // AT2G19810 // AT1G68670 // AT3G16…
GO:0015116	F	sulfate transmembrane transporter activity	6	787	15	37767	3e-06	0.00056	// AT4G08620 // AT3G12520 // AT5G19600 // AT1G77990 // AT1G78000 // AT1G22150
GO:0080090	P	regulation of primary metabolic process	71	787	1952	37767	7.3e-06	0.00068	// AT2G46310 // AT3G09230 // AT5G16600 // AT3G61630 // AT2G36890 // AT1G63210 // AT3G46070 // AT2G13960 // AT1G30650 // AT2G24700 // AT1G43640 // AT3G09290 // AT5G22890 // AT1G55110 // AT5G04150 // AT4G18300 // AT3G60490 // AT3G46080 // AT3G23240 // AT5G42750 // AT5G61590 // AT3G12730 // AT5G39810 // AT3G02400 // AT2G21900 // AT2G24680 // AT5G01200 // AT1G77570 // AT1G29860 // AT2G19810 // AT1G68…
GO:0009644	P	response to high light intensity	9	787	57	37767	7.7e-06	0.00068	// AT2G29500 // AT1G52560 // AT4G12400 // AT2G22240 // AT1G54050 // AT1G74310 // AT2G26150 // AT2G19310 // AT2G46240
GO:0019219	P	regulation of nucleobase, nucleoside, nucleotide and nucleic acid metabolic process	68	787	1847	37767	7.8e-06	0.00068	// AT2G46310 // AT3G09230 // AT5G16600 // AT3G61630 // AT2G36890 // AT1G63210 // AT3G46070 // AT2G13960 // AT1G30650 // AT2G24700 // AT1G43640 // AT3G09290 // AT5G22890 // AT1G55110 // AT5G04150 // AT1G02450 // AT3G60490 // AT3G46080 // AT3G23240 // AT5G61590 // AT3G12730 // AT5G39810 // AT3G02400 // AT2G21900 // AT2G24680 // AT5G01200 // AT1G77570 // AT1G29860 // AT2G19810 // AT1G68670 // AT3G16…
GO:0006355	P	regulation of transcription, DNA-dependent	43	787	987	37767	9.9e-06	0.0008	// AT2G46310 // AT3G09230 // AT5G16600 // AT3G61630 // AT2G36890 // AT1G63210 // AT2G13960 // AT1G30650 // AT2G24700 // AT4G18450 // AT3G60490 // AT5G61590 // AT1G10170 // AT5G39810 // AT3G02400 // AT2G24680 // AT5G01200 // AT1G77570 // AT1G29860 // AT5G26170 // AT1G17950 // AT2G40340 // AT1G72350 // AT1G62300 // AT2G21900 // AT5G13080 // AT5G66980 // AT5G15830 // AT1G67220 // AT4G06746 // AT5G02…
GO:0051252	P	regulation of RNA metabolic process	43	787	996	37767	1.2e-05	0.00092	// AT2G46310 // AT3G09230 // AT5G16600 // AT3G61630 // AT2G36890 // AT1G63210 // AT2G13960 // AT1G30650 // AT2G24700 // AT4G18450 // AT3G60490 // AT5G61590 // AT1G10170 // AT5G39810 // AT3G02400 // AT2G24680 // AT5G01200 // AT1G77570 // AT1G29860 // AT5G26170 // AT1G17950 // AT2G40340 // AT1G72350 // AT1G62300 // AT2G21900 // AT5G13080 // AT5G66980 // AT5G15830 // AT1G67220 // AT4G06746 // AT5G02…
GO:0006350	P	transcription	69	787	1923	37767	1.5e-05	0.001	// AT2G46310 // AT3G09230 // AT5G16600 // AT3G61630 // AT2G36890 // AT1G63210 // AT3G46070 // AT2G13960 // AT1G30650 // AT2G24700 // AT1G43640 // AT3G09290 // AT5G22890 // AT1G55110 // AT5G04150 // AT1G02450 // AT3G60490 // AT3G46080 // AT3G23240 // AT5G61590 // AT3G12730 // AT5G39810 // AT3G02400 // AT2G21900 // AT2G24680 // AT5G01200 // AT1G77570 // AT1G29860 // AT2G19810 // AT1G68670 // AT3G16…
GO:0051171	P	regulation of nitrogen compound metabolic process	68	787	1888	37767	1.5e-05	0.001	// AT2G46310 // AT3G09230 // AT5G16600 // AT3G61630 // AT2G36890 // AT1G63210 // AT3G46070 // AT2G13960 // AT1G30650 // AT2G24700 // AT1G43640 // AT3G09290 // AT5G22890 // AT1G55110 // AT5G04150 // AT1G02450 // AT3G60490 // AT3G46080 // AT3G23240 // AT5G61590 // AT3G12730 // AT5G39810 // AT3G02400 // AT2G21900 // AT2G24680 // AT5G01200 // AT1G77570 // AT1G29860 // AT2G19810 // AT1G68670 // AT3G16…
GO:0031323	P	regulation of cellular metabolic process	71	787	2036	37767	2.7e-05	0.0017	// AT2G46310 // AT3G09230 // AT5G16600 // AT3G61630 // AT2G36890 // AT1G63210 // AT3G46070 // AT2G13960 // AT1G30650 // AT2G24700 // AT1G43640 // AT3G09290 // AT5G22890 // AT1G55110 // AT5G04150 // AT4G18300 // AT3G60490 // AT3G46080 // AT3G23240 // AT5G42750 // AT5G61590 // AT3G12730 // AT5G39810 // AT3G02400 // AT2G21900 // AT2G24680 // AT5G01200 // AT1G77570 // AT1G29860 // AT2G19810 // AT1G68…
GO:0032774	P	RNA biosynthetic process	43	787	1040	37767	3.2e-05	0.0018	// AT2G46310 // AT3G09230 // AT5G16600 // AT3G61630 // AT2G36890 // AT1G63210 // AT2G13960 // AT1G30650 // AT2G24700 // AT4G18450 // AT3G60490 // AT5G61590 // AT1G10170 // AT5G39810 // AT3G02400 // AT2G24680 // AT5G01200 // AT1G77570 // AT1G29860 // AT5G26170 // AT1G17950 // AT2G40340 // AT1G72350 // AT1G62300 // AT2G21900 // AT5G13080 // AT5G66980 // AT5G15830 // AT1G67220 // AT4G06746 // AT5G02…
GO:0006351	P	transcription, DNA-dependent	43	787	1039	37767	3.2e-05	0.0018	// AT2G46310 // AT3G09230 // AT5G16600 // AT3G61630 // AT2G36890 // AT1G63210 // AT2G13960 // AT1G30650 // AT2G24700 // AT4G18450 // AT3G60490 // AT5G61590 // AT1G10170 // AT5G39810 // AT3G02400 // AT2G24680 // AT5G01200 // AT1G77570 // AT1G29860 // AT5G26170 // AT1G17950 // AT2G40340 // AT1G72350 // AT1G62300 // AT2G21900 // AT5G13080 // AT5G66980 // AT5G15830 // AT1G67220 // AT4G06746 // AT5G02…
GO:0009642	P	response to light intensity	10	787	90	37767	3.9e-05	0.0021	// AT2G29500 // AT1G10170 // AT1G52560 // AT4G12400 // AT2G22240 // AT1G54050 // AT1G74310 // AT2G26150 // AT2G19310 // AT2G46240
GO:0006855	P	multidrug transport	9	787	73	37767	4.6e-05	0.0023	// AT3G30842 // AT1G33110 // AT1G71140 // AT1G15170 // AT2G04050 // AT4G22790 // AT2G04070 // AT1G15520 // AT1G66780
GO:0010468	P	regulation of gene expression	69	787	2001	37767	5e-05	0.0024	// AT2G46310 // AT3G09230 // AT5G16600 // AT3G61630 // AT2G36890 // AT1G63210 // AT3G46070 // AT2G13960 // AT1G30650 // AT2G24700 // AT1G43640 // AT3G09290 // AT5G22890 // AT1G55110 // AT5G04150 // AT4G18300 // AT3G60490 // AT3G46080 // AT3G23240 // AT5G61590 // AT3G12730 // AT5G39810 // AT3G02400 // AT2G21900 // AT2G24680 // AT5G01200 // AT1G77570 // AT1G29860 // AT2G19810 // AT1G68670 // AT3G16…
GO:0015893	P	drug transport	9	787	76	37767	6.1e-05	0.0029	// AT3G30842 // AT1G33110 // AT1G71140 // AT1G15170 // AT2G04050 // AT4G22790 // AT2G04070 // AT1G15520 // AT1G66780
GO:0060255	P	regulation of macromolecule metabolic process	70	787	2060	37767	6.7e-05	0.0029	// AT2G46310 // AT3G09230 // AT5G16600 // AT3G61630 // AT2G36890 // AT1G63210 // AT3G46070 // AT2G13960 // AT1G30650 // AT2G24700 // AT1G43640 // AT3G09290 // AT5G22890 // AT1G55110 // AT5G04150 // AT4G18300 // AT3G60490 // AT3G46080 // AT3G23240 // AT5G61590 // AT3G12730 // AT5G39810 // AT3G02400 // AT2G21900 // AT2G24680 // AT5G01200 // AT1G77570 // AT1G29860 // AT2G19810 // AT1G68670 // AT3G16…
GO:0042493	P	response to drug	9	787	77	37767	6.7e-05	0.0029	// AT3G30842 // AT1G33110 // AT1G71140 // AT1G15170 // AT2G04050 // AT4G22790 // AT2G04070 // AT1G15520 // AT1G66780
GO:0042221	P	response to chemical stimulus	70	787	2085	37767	9.5e-05	0.004	// AT1G75750 // AT3G02480 // AT3G09230 // AT1G67100 // AT5G16600 // AT1G52560 // AT2G36890 // AT3G09440 // AT5G64100 // AT5G16960 // AT5G22890 // AT1G71140 // AT1G15170 // AT1G52200 // AT4G01350 // AT5G02490 // AT3G46080 // AT5G13370 // AT1G67710 // AT3G24500 // AT2G29500 // AT1G10170 // AT5G51760 // AT1G33110 // AT5G64250 // AT1G54050 // AT2G04050 // AT3G23240 // AT3G10020 // AT5G39610 // AT4G02…
GO:0010035	P	response to inorganic substance	17	787	279	37767	0.00014	0.0058	// AT2G29500 // AT2G19310 // AT4G26560 // AT5G44460 // AT5G64250 // AT1G52560 // AT4G12400 // AT2G22240 // AT1G54050 // AT3G09440 // AT2G26150 // AT5G05410 // AT3G56350 // AT4G02380 // AT5G02490 // AT1G74310 // AT2G46240
GO:0009266	P	response to temperature stimulus	24	787	485	37767	0.00015	0.006	// AT1G52560 // AT3G46230 // AT3G09440 // AT1G55920 // AT5G02490 // AT1G53540 // AT2G29500 // AT1G54050 // AT5G15450 // AT5G10140 // AT2G40340 // AT5G37670 // AT4G10250 // AT4G12400 // AT2G22240 // AT1G74310 // AT1G59860 // AT2G26150 // AT2G18260 // AT2G46240 // AT4G02380 // AT5G05410 // AT2G19310 // AT3G24500
GO:0019222	P	regulation of metabolic process	72	787	2210	37767	0.00018	0.0068	// AT2G46310 // AT3G09230 // AT5G16600 // AT3G61630 // AT2G36890 // AT1G63210 // AT3G46070 // AT2G13960 // AT1G30650 // AT2G24700 // AT1G43640 // AT3G09290 // AT5G22890 // AT1G55110 // AT5G04150 // AT4G18300 // AT3G60490 // AT3G46080 // AT3G23240 // AT5G42750 // AT5G61590 // AT3G12730 // AT5G39810 // AT3G02400 // AT2G21900 // AT2G24680 // AT5G01200 // AT1G77570 // AT1G29860 // AT2G19810 // AT1G68…
GO:0004364	F	glutathione transferase activity	8	787	57	37767	5.3e-05	0.0075	// AT2G02930 // AT5G44000 // AT1G78360 // AT2G29470 // AT5G62480 // AT2G29450 // AT1G02930 // AT1G17180
GO:0009404	P	toxin metabolic process	7	787	53	37767	0.00022	0.0076	// AT2G02930 // AT1G78360 // AT2G29470 // AT5G62480 // AT2G29450 // AT1G02930 // AT1G17180
GO:0009407	P	toxin catabolic process	7	787	53	37767	0.00022	0.0076	// AT2G02930 // AT1G78360 // AT2G29470 // AT5G62480 // AT2G29450 // AT1G02930 // AT1G17180
GO:0050794	P	regulation of cellular process	100	787	3375	37767	0.00031	0.01	// AT3G04210 // AT1G30650 // AT4G18450 // AT4G18300 // AT5G42750 // AT2G40740 // AT5G26900 // AT1G51270 // AT1G77570 // AT2G40340 // AT3G16360 // AT5G59710 // AT1G31050 // AT3G57300 // AT2G02950 // AT5G15830 // AT3G10040 // AT2G45130 // AT1G13300 // AT3G50260 // AT3G06220 // AT3G61630 // AT2G36890 // AT1G63210 // AT2G13960 // AT1G43640 // AT3G24500 // AT3G27473 // AT3G12730 // AT2G21900 // AT1G64…
GO:0022857	F	transmembrane transporter activity	44	787	1128	37767	9.5e-05	0.011	// AT3G63380 // AT1G22150 // AT1G77990 // AT1G30420 // AT5G47450 // AT5G18290 // AT5G25450 // AT5G43360 // AT2G07671 // AT3G05400 // AT5G61730 // AT3G12520 // AT1G33110 // AT1G15170 // AT2G04050 // AT3G13080 // AT3G60970 // AT3G01760 // AT2G04070 // AT1G15520 // AT4G23700 // AT4G08620 // AT5G19600 // AT1G08100 // AT5G55470 // AT2G24710 // AT5G47560 // AT1G79410 // AT5G09720 // AT1G78000 // AT3G60…
GO:0030145	F	manganese ion binding	6	787	32	37767	0.00011	0.011	// AT5G39130 // AT5G38910 // AT5G39150 // AT5G39110 // AT5G39120 // AT5G39160
GO:0003677	F	DNA binding	90	787	2892	37767	0.00013	0.011	// AT5G14000 // AT1G30650 // AT4G35900 // AT4G18450 // AT2G40740 // AT2G28720 // AT1G77570 // AT5G39610 // AT2G40340 // AT1G31050 // AT1G29860 // AT2G14210 // AT2G26150 // AT3G10040 // AT5G15830 // AT2G28700 // AT4G33880 // AT1G13300 // AT5G41410 // AT3G50260 // AT3G06220 // AT1G49900 // AT3G61630 // AT2G36890 // AT2G13960 // AT1G43640 // AT3G24500 // AT3G60490 // AT3G12730 // AT1G75600 // AT5G10…
GO:0015238	F	drug transmembrane transporter activity	8	787	74	37767	0.00027	0.019	// AT1G33110 // AT1G71140 // AT1G15170 // AT2G04050 // AT4G22790 // AT2G04070 // AT1G66780 // AT2G04040
GO:0050789	P	regulation of biological process	106	787	3697	37767	0.00062	0.021	// AT3G04210 // AT1G30650 // AT4G35900 // AT4G18450 // AT4G18300 // AT5G42750 // AT2G40740 // AT5G26900 // AT1G51270 // AT1G77570 // AT2G40340 // AT3G16360 // AT5G59710 // AT1G31050 // AT3G57300 // AT2G02950 // AT5G15830 // AT3G10040 // AT2G45130 // AT1G13300 // AT2G42620 // AT3G50260 // AT3G06220 // AT3G61630 // AT2G36890 // AT1G63210 // AT2G13960 // AT1G43640 // AT3G24500 // AT3G27473 // AT3G12…
GO:0015103	F	inorganic anion transmembrane transporter activity	8	787	79	37767	0.00041	0.026	// AT4G08620 // AT1G22150 // AT5G19600 // AT1G08100 // AT3G12520 // AT1G77990 // AT5G43360 // AT1G78000
GO:0055085	P	transmembrane transport	14	787	244	37767	0.00094	0.03	// AT3G30842 // AT3G05400 // AT2G07707 // AT1G33110 // AT2G07741 // AT1G77210 // AT1G71140 // AT1G15170 // AT2G04050 // AT4G22790 // AT2G04070 // AT2G07671 // AT1G15520 // AT1G66780
GO:0006811	P	ion transport	20	787	427	37767	0.001	0.032	// AT2G36950 // AT5G52680 // AT3G63380 // AT4G08620 // AT2G07707 // AT2G07741 // AT5G55470 // AT5G47560 // AT1G29100 // AT5G52700 // AT5G60800 // AT5G03380 // AT4G23700 // AT1G08100 // AT1G22990 // AT2G04040 // AT2G07671 // AT1G15520 // AT5G09720 // AT1G68740
GO:0045735	F	nutrient reservoir activity	7	787	63	37767	0.00057	0.032	// AT5G39130 // AT5G38910 // AT5G39150 // AT5G39110 // AT5G39120 // AT5G39160 // AT4G36700
GO:0006952	P	defense response	30	787	766	37767	0.0011	0.034	// AT2G17430 // AT5G04230 // AT2G02120 // AT4G11340 // AT4G11650 // AT3G23010 // AT5G45000 // AT1G74710 // AT1G10170 // AT3G04210 // AT5G43580 // AT1G51270 // AT4G12480 // AT3G23240 // AT2G03760 // AT1G47890 // AT2G15220 // AT5G43570 // AT2G22240 // AT3G23120 // AT1G02450 // AT5G46260 // AT2G46240 // AT3G46530 // AT5G13320 // AT4G04220 // AT2G23960 // AT4G19925 // AT5G64890 // AT1G70880
GO:0009991	P	response to extracellular stimulus	9	787	117	37767	0.0012	0.034	// AT5G48850 // AT2G45130 // AT2G14210 // AT3G05630 // AT5G13080 // AT1G55920 // AT1G78000 // AT4G02380 // AT1G68740
GO:0030001	P	metal ion transport	13	787	224	37767	0.0013	0.037	// AT2G36950 // AT5G52680 // AT3G63380 // AT5G55470 // AT5G47560 // AT1G29100 // AT5G52700 // AT5G60800 // AT5G03380 // AT1G22990 // AT1G15520 // AT5G09720 // AT2G04040
GO:0031667	P	response to nutrient levels	8	787	101	37767	0.0018	0.051	// AT5G48850 // AT2G45130 // AT2G14210 // AT3G05630 // AT5G13080 // AT1G55920 // AT1G78000 // AT1G68740
GO:0006812	P	cation transport	17	787	357	37767	0.002	0.054	// AT2G36950 // AT5G52680 // AT3G63380 // AT2G07707 // AT2G07741 // AT5G55470 // AT5G47560 // AT1G29100 // AT5G52700 // AT5G60800 // AT5G03380 // AT4G23700 // AT1G22990 // AT2G07671 // AT1G15520 // AT5G09720 // AT2G04040
GO:0065007	P	biological regulation	114	787	4188	37767	0.0022	0.06	// AT1G75750 // AT3G04210 // AT1G30650 // AT4G35900 // AT4G18450 // AT4G18300 // AT5G42750 // AT2G40740 // AT5G26900 // AT1G51270 // AT1G77570 // AT2G03760 // AT2G40340 // AT3G16360 // AT5G59710 // AT1G31050 // AT3G57300 // AT2G02950 // AT5G15830 // AT3G10040 // AT2G45130 // AT1G13300 // AT2G42620 // AT3G50260 // AT3G06220 // AT3G61630 // AT2G36890 // AT1G63210 // AT2G13960 // AT1G43640 // AT3G24…
GO:0008509	F	anion transmembrane transporter activity	9	787	120	37767	0.0014	0.071	// AT3G12520 // AT4G08620 // AT1G22150 // AT5G19600 // AT1G08100 // AT5G47560 // AT1G77990 // AT5G43360 // AT1G78000
GO:0009607	P	response to biotic stimulus	25	787	638	37767	0.0028	0.072	// AT5G64250 // AT5G02490 // AT5G24530 // AT1G74710 // AT1G10170 // AT3G50460 // AT4G12480 // AT3G01420 // AT1G15520 // AT4G11650 // AT5G24540 // AT1G05010 // AT2G22240 // AT2G26150 // AT3G53160 // AT1G02450 // AT3G60160 // AT2G46240 // AT3G46530 // AT5G13320 // AT3G50470 // AT5G64890 // AT2G26820 // AT1G33890 // AT1G70880
GO:0006119	P	oxidative phosphorylation	6	787	69	37767	0.0043	0.11	// AT2G07707 // AT2G07671 // AT5G25450 // AT2G07687 // AT2G07689 // AT2G07741
GO:0022804	F	active transmembrane transporter activity	26	787	664	37767	0.0023	0.11	// AT3G63380 // AT1G30420 // AT5G47450 // AT5G43360 // AT5G61730 // AT1G33110 // AT1G15170 // AT2G04050 // AT3G13080 // AT3G01760 // AT3G60970 // AT2G04070 // AT1G15520 // AT4G22790 // AT3G05400 // AT5G55470 // AT5G47560 // AT1G79410 // AT3G60160 // AT1G77210 // AT1G71140 // AT5G61700 // AT3G13090 // AT4G23700 // AT1G66780 // AT2G04040
GO:0008194	F	UDP-glycosyltransferase activity	12	787	219	37767	0.003	0.12	// AT2G36770 // AT2G43820 // AT1G22370 // AT2G28110 // AT3G53150 // AT2G36780 // AT2G36800 // AT3G53160 // AT5G05900 // AT3G21790 // AT3G21780 // AT1G05680
GO:0030246	F	carbohydrate binding	10	787	162	37767	0.0029	0.12	// AT2G02250 // AT1G61480 // AT2G43570 // AT2G26400 // AT4G28350 // AT1G67520 // AT2G26820 // AT1G80110 // AT2G43590 // AT5G59260
GO:0016757	F	transferase activity, transferring glycosyl groups	22	787	544	37767	0.0034	0.13	// AT4G02390 // AT1G22370 // AT3G53150 // AT2G36780 // AT1G05680 // AT4G01970 // AT5G49690 // AT3G21790 // AT1G60470 // AT5G59530 // AT2G36800 // AT4G10120 // AT1G05670 // AT2G43820 // AT3G53160 // AT5G05900 // AT3G21780 // AT2G36770 // AT3G57380 // AT2G28110 // AT1G56600 // AT1G61050
GO:0005215	F	transporter activity	47	787	1477	37767	0.0036	0.13	// AT3G63380 // AT1G22150 // AT2G18180 // AT3G61450 // AT1G30420 // AT5G47450 // AT5G18290 // AT5G25450 // AT5G43360 // AT2G07671 // AT3G05400 // AT5G61730 // AT3G12520 // AT1G33110 // AT1G15170 // AT2G04050 // AT3G13080 // AT3G60970 // AT3G01760 // AT2G04070 // AT1G15520 // AT4G23700 // AT4G08620 // AT5G19600 // AT1G08100 // AT5G55470 // AT2G24710 // AT5G47560 // AT3G45720 // AT1G79410 // AT5G09…
GO:0009267	P	cellular response to starvation	6	787	73	37767	0.0056	0.14	// AT5G48850 // AT2G45130 // AT3G05630 // AT1G68740 // AT1G78000 // AT1G55920
GO:0031668	P	cellular response to extracellular stimulus	7	787	98	37767	0.0058	0.14	// AT5G48850 // AT2G45130 // AT3G05630 // AT1G55920 // AT1G78000 // AT4G02380 // AT1G68740
GO:0015297	F	antiporter activity	10	787	170	37767	0.0041	0.14	// AT1G66780 // AT1G33110 // AT5G55470 // AT1G71140 // AT1G15170 // AT2G04050 // AT4G22790 // AT2G04070 // AT2G04040 // AT4G23700
GO:0016070	P	RNA metabolic process	50	787	1657	37767	0.0072	0.17	// AT2G46310 // AT3G09230 // AT2G38340 // AT5G16600 // AT3G61630 // AT2G36890 // AT1G63210 // AT2G13960 // AT1G30650 // AT2G24700 // AT1G08115 // AT4G18450 // AT4G38780 // AT3G60490 // AT5G61590 // AT1G61470 // AT1G10170 // AT5G45990 // AT3G02400 // AT2G21900 // AT2G24680 // AT5G01200 // AT1G77570 // AT1G29860 // AT5G26170 // AT1G17950 // AT2G40340 // AT1G72350 // AT1G62300 // AT3G13210 // AT5G13…
GO:0043167	F	ion binding	61	787	2087	37767	0.0061	0.17	// AT2G36950 // AT5G39130 // AT5G38910 // AT5G39150 // AT3G47480 // AT4G28270 // AT5G39110 // AT2G25410 // AT5G64100 // AT5G16960 // AT2G46495 // AT3G56350 // AT2G38390 // AT3G27473 // AT3G46080 // AT5G49200 // AT3G54780 // AT5G52700 // AT1G26800 // AT1G08500 // AT1G64480 // AT5G59940 // AT2G34000 // AT5G01320 // AT5G07060 // AT5G49665 // AT1G14200 // AT2G07695 // AT5G39160 // AT3G24070 // AT1G29…
GO:0043169	F	cation binding	61	787	2087	37767	0.0061	0.17	// AT2G36950 // AT5G39130 // AT5G38910 // AT5G39150 // AT3G47480 // AT4G28270 // AT5G39110 // AT2G25410 // AT5G64100 // AT5G16960 // AT2G46495 // AT3G56350 // AT2G38390 // AT3G27473 // AT3G46080 // AT5G49200 // AT3G54780 // AT5G52700 // AT1G26800 // AT1G08500 // AT1G64480 // AT5G59940 // AT2G34000 // AT5G01320 // AT5G07060 // AT5G49665 // AT1G14200 // AT2G07695 // AT5G39160 // AT3G24070 // AT1G29…
GO:0046872	F	metal ion binding	59	787	1997	37767	0.0057	0.17	// AT2G36950 // AT5G39130 // AT5G38910 // AT5G39150 // AT3G47480 // AT4G28270 // AT5G39110 // AT2G25410 // AT5G64100 // AT5G16960 // AT2G46495 // AT3G56350 // AT2G38390 // AT3G27473 // AT3G46080 // AT5G49200 // AT3G54780 // AT5G52700 // AT1G26800 // AT1G08500 // AT1G64480 // AT5G59940 // AT2G34000 // AT5G01320 // AT5G07060 // AT5G49665 // AT1G14200 // AT2G07695 // AT5G39160 // AT3G24070 // AT1G29…
GO:0016820	F	hydrolase activity, acting on acid anhydrides, catalyzing transmembrane movement of substances	10	787	183	37767	0.0066	0.18	// AT3G63380 // AT5G61730 // AT2G07707 // AT1G30420 // AT5G61700 // AT3G13090 // AT3G13080 // AT3G60970 // AT3G60160 // AT1G15520
GO:0015075	F	ion transmembrane transporter activity	24	787	655	37767	0.0072	0.19	// AT3G63380 // AT1G22150 // AT5G09720 // AT5G25450 // AT5G43360 // AT2G07671 // AT3G05400 // AT3G12520 // AT1G77990 // AT2G07695 // AT4G08620 // AT5G19600 // AT1G08100 // AT5G55470 // AT2G24710 // AT5G47560 // AT1G79410 // AT1G78000 // AT2G07741 // AT2G07707 // AT1G77210 // AT2G46430 // AT4G23700 // AT2G07687
GO:0015291	F	secondary active transmembrane transporter activity	15	787	345	37767	0.0077	0.19	// AT5G47560 // AT1G77210 // AT3G05400 // AT1G66780 // AT1G33110 // AT5G55470 // AT1G71140 // AT1G15170 // AT2G04050 // AT1G79410 // AT5G43360 // AT4G22790 // AT2G04070 // AT2G04040 // AT4G23700
GO:0042594	P	response to starvation	6	787	81	37767	0.0089	0.21	// AT5G48850 // AT2G45130 // AT3G05630 // AT1G68740 // AT1G78000 // AT1G55920
GO:0031669	P	cellular response to nutrient levels	6	787	82	37767	0.0094	0.22	// AT5G48850 // AT2G45130 // AT3G05630 // AT1G68740 // AT1G78000 // AT1G55920
GO:0051707	P	response to other organism	22	787	599	37767	0.0096	0.22	// AT5G64250 // AT5G02490 // AT5G24530 // AT1G74710 // AT1G10170 // AT3G50460 // AT4G12480 // AT3G01420 // AT4G11650 // AT5G24540 // AT1G05010 // AT2G22240 // AT3G53160 // AT1G02450 // AT3G60160 // AT2G46240 // AT3G46530 // AT5G13320 // AT3G50470 // AT5G64890 // AT2G26820 // AT1G33890
GO:0009605	P	response to external stimulus	17	787	429	37767	0.011	0.24	// AT5G13320 // AT5G48850 // AT5G04230 // AT2G45130 // AT4G35770 // AT5G43580 // AT4G13300 // AT2G14210 // AT5G43570 // AT3G05630 // AT2G02950 // AT5G13080 // AT1G55920 // AT1G78000 // AT4G02380 // AT1G19660 // AT1G68740
GO:0005576	C	extracellular region	15	787	285	37767	0.0014	0.24	// AT5G39130 // AT4G14630 // AT5G39150 // AT2G18660 // AT5G39110 // AT4G33710 // AT2G43570 // AT1G68765 // AT5G39120 // AT5G39190 // AT3G09440 // AT4G33720 // AT5G39160 // AT4G07820 // AT5G38910
GO:0015078	F	hydrogen ion transmembrane transporter activity	8	787	139	37767	0.011	0.26	// AT2G07707 // AT2G07741 // AT5G55470 // AT5G25450 // AT4G23700 // AT2G07687 // AT2G07695 // AT2G07671
GO:0016887	F	ATPase activity	18	787	482	37767	0.015	0.35	// AT3G63380 // AT5G61730 // AT3G28510 // AT3G13090 // AT4G16680 // AT1G30420 // AT3G28540 // AT5G61700 // AT1G74310 // AT5G15450 // AT3G13080 // AT3G60970 // AT5G40010 // AT1G43910 // AT2G18193 // AT3G60160 // AT2G07671 // AT1G15520
GO:0042626	F	ATPase activity, coupled to transmembrane movement of substances	9	787	181	37767	0.017	0.35	// AT3G63380 // AT5G61730 // AT1G30420 // AT5G61700 // AT3G13090 // AT3G13080 // AT3G60970 // AT3G60160 // AT1G15520
GO:0043492	F	ATPase activity, coupled to movement of substances	9	787	181	37767	0.017	0.35	// AT3G63380 // AT5G61730 // AT1G30420 // AT5G61700 // AT3G13090 // AT3G13080 // AT3G60970 // AT3G60160 // AT1G15520
GO:0010200	P	response to chitin	8	787	151	37767	0.017	0.36	// AT4G18450 // AT4G01350 // AT2G17040 // AT5G22890 // AT2G26150 // AT3G50260 // AT3G46080 // AT1G62300
GO:0022891	F	substrate-specific transmembrane transporter activity	29	787	908	37767	0.019	0.38	// AT3G63380 // AT1G22150 // AT5G47450 // AT5G18290 // AT5G25450 // AT5G43360 // AT2G07671 // AT3G05400 // AT3G12520 // AT1G77990 // AT3G13080 // AT3G01760 // AT2G07695 // AT4G08620 // AT5G19600 // AT1G08100 // AT5G55470 // AT2G24710 // AT5G47560 // AT1G79410 // AT5G09720 // AT1G78000 // AT2G07741 // AT4G05130 // AT2G07707 // AT1G77210 // AT2G46430 // AT4G23700 // AT2G07687
GO:0015077	F	monovalent inorganic cation transmembrane transporter activity	8	787	156	37767	0.02	0.39	// AT2G07707 // AT2G07741 // AT5G55470 // AT5G25450 // AT4G23700 // AT2G07687 // AT2G07695 // AT2G07671
GO:0006139	P	nucleobase, nucleoside, nucleotide and nucleic acid metabolic process	84	787	3198	37767	0.019	0.4	// AT3G45610 // AT2G46310 // AT3G09230 // AT2G38340 // AT5G16600 // AT3G61630 // AT2G36890 // AT1G63210 // AT3G46070 // AT2G13960 // AT3G63380 // AT2G24700 // AT1G43640 // AT3G09290 // AT5G22890 // AT1G55110 // AT5G04150 // AT1G02450 // AT4G38780 // AT3G60490 // AT3G46080 // AT3G23240 // AT1G30650 // AT1G66730 // AT5G61590 // AT1G61470 // AT3G12730 // AT5G01200 // AT5G14760 // AT2G07671 // AT2G19…
GO:0016765	F	transferase activity, transferring alkyl or aryl (other than methyl) groups	8	787	158	37767	0.021	0.4	// AT2G02930 // AT5G44000 // AT1G78360 // AT2G29470 // AT5G62480 // AT2G29450 // AT1G02930 // AT1G17180
GO:0016740	F	transferase activity	86	787	3321	37767	0.024	0.41	// AT1G50090 // AT2G23030 // AT4G18300 // AT3G21790 // AT5G01320 // AT2G03760 // AT3G16360 // AT5G44000 // AT2G13360 // AT2G43920 // AT5G62480 // AT3G21780 // AT3G57380 // AT2G28110 // AT2G40520 // AT1G56600 // AT2G29220 // AT5G39050 // AT1G36370 // AT1G61480 // AT1G22370 // AT3G53150 // AT1G55920 // AT3G50280 // AT5G42830 // AT1G60470 // AT5G25110 // AT2G29450 // AT1G67980 // AT5G59260 // AT5G53…
GO:0031072	F	heat shock protein binding	7	787	130	37767	0.023	0.41	// AT2G35540 // AT1G71000 // AT1G56300 // AT5G03030 // AT2G20560 // AT4G19570 // AT1G72416
GO:0009055	F	electron carrier activity	12	787	294	37767	0.024	0.41	// AT1G26420 // AT5G57920 // AT4G25650 // AT1G26410 // AT1G08500 // AT5G64100 // AT2G38390 // AT1G30700 // AT1G02590 // AT1G26380 // AT2G07695 // AT5G39865
GO:0005488	F	binding	261	787	11258	37767	0.024	0.41	// AT2G17430 // AT3G47480 // AT5G39110 // AT1G30650 // AT5G64100 // AT4G35900 // AT4G18450 // AT5G53680 // AT4G18300 // AT2G07734 // AT3G54780 // AT5G42750 // AT1G60500 // AT5G07650 // AT5G25230 // AT5G45990 // AT2G40740 // AT3G04210 // AT1G26380 // AT2G28720 // AT5G01320 // AT5G02320 // AT5G39610 // AT1G30700 // AT3G26220 // AT2G40340 // AT2G02250 // AT5G18340 // AT5G59710 // AT1G31050 // AT2G34…
GO:0008483	F	transaminase activity	5	787	76	37767	0.025	0.41	// AT3G08860 // AT1G10060 // AT5G53970 // AT2G13360 // AT1G50090
GO:0016769	F	transferase activity, transferring nitrogenous groups	5	787	77	37767	0.026	0.42	// AT3G08860 // AT1G10060 // AT5G53970 // AT2G13360 // AT1G50090
GO:0009620	P	response to fungus	8	787	158	37767	0.021	0.44	// AT5G13320 // AT1G74710 // AT5G64250 // AT1G05010 // AT2G22240 // AT4G12480 // AT5G24530 // AT2G46240
GO:0016667	F	oxidoreductase activity, acting on sulfur group of donors	6	787	109	37767	0.031	0.46	// AT4G04800 // AT1G62180 // AT5G38900 // AT4G21840 // AT4G21990 // AT5G39865
GO:0017111	F	nucleoside-triphosphatase activity	25	787	792	37767	0.031	0.46	// AT3G63380 // AT1G30420 // AT1G43910 // AT2G07671 // AT1G60500 // AT5G25230 // AT4G27370 // AT3G28540 // AT5G15450 // AT3G13080 // AT3G60970 // AT5G20470 // AT1G15520 // AT5G17760 // AT1G74310 // AT4G18330 // AT5G61730 // AT5G40010 // AT5G46260 // AT3G60160 // AT4G16680 // AT2G18193 // AT5G61700 // AT3G13090 // AT3G28510
GO:0016817	F	hydrolase activity, acting on acid anhydrides	26	787	839	37767	0.034	0.49	// AT3G63380 // AT1G30420 // AT1G43910 // AT2G07671 // AT1G60500 // AT5G25230 // AT4G27370 // AT3G28540 // AT5G15450 // AT3G13080 // AT3G60970 // AT5G20470 // AT1G15520 // AT5G17760 // AT1G74310 // AT4G18330 // AT5G61730 // AT5G40010 // AT5G46260 // AT3G60160 // AT4G16680 // AT2G18193 // AT2G07707 // AT5G61700 // AT3G13090 // AT3G28510
GO:0046914	F	transition metal ion binding	45	787	1618	37767	0.035	0.49	// AT5G39130 // AT5G38910 // AT5G39150 // AT4G28270 // AT5G39110 // AT2G25410 // AT5G64100 // AT5G16960 // AT2G46495 // AT2G38390 // AT3G27473 // AT3G46080 // AT5G49200 // AT3G54780 // AT1G26800 // AT1G08500 // AT5G59940 // AT2G34000 // AT5G07060 // AT5G49665 // AT1G14200 // AT2G07695 // AT5G39160 // AT3G24070 // AT1G29100 // AT4G01350 // AT5G39120 // AT3G46070 // AT5G42840 // AT2G02690 // AT5G60…
GO:0033554	P	cellular response to stress	15	787	399	37767	0.024	0.5	// AT3G46530 // AT1G66730 // AT5G48850 // AT2G26150 // AT2G45130 // AT1G68740 // AT3G57300 // AT3G05630 // AT2G30350 // AT1G55920 // AT1G05055 // AT1G78000 // AT4G02380 // AT5G13080 // AT3G56350
GO:0009414	P	response to water deprivation	10	787	229	37767	0.026	0.52	// AT3G02480 // AT5G61590 // AT2G42620 // AT3G15500 // AT5G05410 // AT3G24500 // AT4G02380 // AT2G18050 // AT2G41240 // AT1G02930
GO:0006807	P	nitrogen compound metabolic process	97	787	3826	37767	0.028	0.55	// AT1G64660 // AT1G50090 // AT1G67220 // AT1G30650 // AT4G18450 // AT4G38780 // AT1G44180 // AT2G40740 // AT1G77570 // AT2G40340 // AT5G54080 // AT5G59710 // AT1G31050 // AT1G29860 // AT1G05010 // AT3G57300 // AT4G33880 // AT5G15830 // AT2G07741 // AT3G10040 // AT2G26550 // AT1G13300 // AT3G50260 // AT5G38200 // AT3G06220 // AT1G36370 // AT3G61630 // AT2G36890 // AT1G63210 // AT2G13960 // AT1G43…
GO:0019748	P	secondary metabolic process	17	787	489	37767	0.032	0.63	// AT1G16410 // AT2G02930 // AT5G48180 // AT5G14760 // AT1G24280 // AT1G78360 // AT2G29470 // AT5G62480 // AT3G16390 // AT4G13300 // AT4G25700 // AT2G29450 // AT1G67980 // AT5G24530 // AT3G21780 // AT1G02930 // AT1G17180
GO:0009415	P	response to water	10	787	240	37767	0.034	0.64	// AT3G02480 // AT5G61590 // AT2G42620 // AT3G15500 // AT5G05410 // AT3G24500 // AT4G02380 // AT2G18050 // AT2G41240 // AT1G02930
GO:0019825	F	oxygen binding	10	787	255	37767	0.047	0.65	// AT2G28850 // AT2G45550 // AT4G31970 // AT2G02580 // AT4G37430 // AT4G37370 // AT3G26220 // AT4G15380 // AT3G14680 // AT3G26210
GO:0016462	F	pyrophosphatase activity	25	787	832	37767	0.049	0.67	// AT3G63380 // AT1G30420 // AT1G43910 // AT2G07671 // AT1G60500 // AT5G25230 // AT4G27370 // AT3G28540 // AT5G15450 // AT3G13080 // AT3G60970 // AT5G20470 // AT1G15520 // AT5G17760 // AT1G74310 // AT4G18330 // AT5G61730 // AT5G40010 // AT5G46260 // AT3G60160 // AT4G16680 // AT2G18193 // AT5G61700 // AT3G13090 // AT3G28510
GO:0045333	P	cellular respiration	5	787	85	37767	0.037	0.69	// AT3G60100 // AT2G07689 // AT5G25450 // AT2G07695 // AT2G07687
GO:0015980	P	energy derivation by oxidation of organic compounds	5	787	85	37767	0.037	0.69	// AT3G60100 // AT2G07689 // AT5G25450 // AT2G07695 // AT2G07687
GO:0016818	F	hydrolase activity, acting on acid anhydrides, in phosphorus-containing anhydrides	25	787	837	37767	0.052	0.69	// AT3G63380 // AT1G30420 // AT1G43910 // AT2G07671 // AT1G60500 // AT5G25230 // AT4G27370 // AT3G28540 // AT5G15450 // AT3G13080 // AT3G60970 // AT5G20470 // AT1G15520 // AT5G17760 // AT1G74310 // AT4G18330 // AT5G61730 // AT5G40010 // AT5G46260 // AT3G60160 // AT4G16680 // AT2G18193 // AT5G61700 // AT3G13090 // AT3G28510
GO:0022890	F	inorganic cation transmembrane transporter activity	9	787	228	37767	0.056	0.7	// AT3G63380 // AT2G07707 // AT2G07741 // AT5G55470 // AT5G25450 // AT4G23700 // AT2G07687 // AT2G07695 // AT2G07671
GO:0016491	F	oxidoreductase activity	40	787	1463	37767	0.055	0.7	// AT4G04800 // AT1G62180 // AT5G64250 // AT5G64100 // AT5G16960 // AT4G24050 // AT5G25450 // AT4G25700 // AT4G21840 // AT3G56350 // AT2G38390 // AT5G24530 // AT2G15620 // AT1G26410 // AT5G14760 // AT1G26380 // AT1G30700 // AT1G02590 // AT2G07695 // AT1G24280 // AT5G54080 // AT1G16410 // AT3G09220 // AT5G38900 // AT2G30670 // AT1G05010 // AT1G26420 // AT1G12010 // AT2G26400 // AT2G07689 // AT5G39…
GO:0003824	F	catalytic activity	221	787	9638	37767	0.057	0.71	// AT1G64660 // AT1G50090 // AT1G30420 // AT2G30660 // AT1G74310 // AT5G64100 // AT4G21840 // AT2G23030 // AT4G18300 // AT5G24530 // AT3G21790 // AT3G03500 // AT3G54780 // AT1G15040 // AT1G60500 // AT5G25230 // AT1G44180 // AT4G27370 // AT5G04230 // AT5G47590 // AT5G01320 // AT2G03760 // AT5G20470 // AT5G54080 // AT3G16360 // AT2G36770 // AT5G18340 // AT5G44000 // AT1G25054 // AT3G20015 // AT1G36…
GO:0009617	P	response to bacterium	10	787	247	37767	0.039	0.72	// AT5G13320 // AT4G11650 // AT1G74710 // AT1G10170 // AT2G22240 // AT5G02490 // AT2G26820 // AT5G24530 // AT1G33890 // AT1G02450
GO:0009628	P	response to abiotic stimulus	41	787	1471	37767	0.041	0.74	// AT1G52560 // AT2G36890 // AT3G46230 // AT3G09440 // AT4G35900 // AT1G55920 // AT2G38390 // AT5G02490 // AT1G53540 // AT5G24470 // AT2G29500 // AT1G10170 // AT1G54050 // AT5G15450 // AT5G10140 // AT2G41240 // AT2G40340 // AT5G37670 // AT1G02930 // AT3G02480 // AT4G10250 // AT4G12400 // AT2G22240 // AT2G24710 // AT1G59860 // AT4G02380 // AT2G18260 // AT5G61590 // AT1G73260 // AT2G18050 // AT1G74…
GO:0034641	P	cellular nitrogen compound metabolic process	17	787	506	37767	0.042	0.74	// AT5G48180 // AT1G64660 // AT1G36370 // AT1G50090 // AT4G13890 // AT2G43820 // AT5G14760 // AT1G05010 // AT5G22800 // AT3G16390 // AT1G44180 // AT1G15040 // AT5G38200 // AT1G17960 // AT1G24280 // AT5G54080 // AT2G26550
GO:0022892	F	substrate-specific transporter activity	30	787	1059	37767	0.062	0.75	// AT3G63380 // AT1G22150 // AT3G61450 // AT5G47450 // AT5G18290 // AT5G25450 // AT5G43360 // AT2G07671 // AT3G05400 // AT3G12520 // AT1G77990 // AT3G13080 // AT3G01760 // AT2G07695 // AT4G08620 // AT5G19600 // AT1G08100 // AT5G55470 // AT2G24710 // AT5G47560 // AT1G79410 // AT5G09720 // AT1G78000 // AT2G07741 // AT4G05130 // AT2G07707 // AT1G77210 // AT2G46430 // AT4G23700 // AT2G07687
GO:0006955	P	immune response	13	787	367	37767	0.05	0.87	// AT3G46530 // AT5G13320 // AT4G11650 // AT1G74710 // AT3G04210 // AT4G11340 // AT4G19925 // AT2G22240 // AT1G51270 // AT5G64890 // AT1G02450 // AT5G46260 // AT5G45000
GO:0002376	P	immune system process	13	787	368	37767	0.051	0.87	// AT3G46530 // AT5G13320 // AT4G11650 // AT1G74710 // AT3G04210 // AT4G11340 // AT4G19925 // AT2G22240 // AT1G51270 // AT5G64890 // AT1G02450 // AT5G46260 // AT5G45000
GO:0015399	F	primary active transmembrane transporter activity	9	787	244	37767	0.077	0.89	// AT3G63380 // AT5G61730 // AT1G30420 // AT5G61700 // AT3G13090 // AT3G13080 // AT3G60970 // AT3G60160 // AT1G15520
GO:0015405	F	P-P-bond-hydrolysis-driven transmembrane transporter activity	9	787	243	37767	0.075	0.89	// AT3G63380 // AT5G61730 // AT1G30420 // AT5G61700 // AT3G13090 // AT3G13080 // AT3G60970 // AT3G60160 // AT1G15520
GO:0051716	P	cellular response to stimulus	25	787	840	37767	0.054	0.9	// AT2G36890 // AT4G18450 // AT3G56350 // AT3G24500 // AT1G67710 // AT1G66730 // AT5G48850 // AT3G23240 // AT2G30350 // AT4G02380 // AT3G16360 // AT1G70510 // AT3G57300 // AT2G02950 // AT5G13080 // AT1G05055 // AT1G78000 // AT3G46530 // AT5G13320 // AT2G26150 // AT2G45130 // AT3G15500 // AT3G05630 // AT1G68740 // AT1G55920
GO:0012505	C	endomembrane system	90	787	3416	37767	0.014	0.95	// AT3G47480 // AT5G39110 // AT2G07739 // AT3G03500 // AT2G36724 // AT1G75810 // AT3G04210 // AT1G26380 // AT1G77570 // AT2G44220 // AT3G20015 // AT3G59930 // AT5G39120 // AT5G20860 // AT1G67600 // AT2G31945 // AT2G31940 // AT1G13605 // AT3G29970 // AT2G29220 // AT5G57920 // AT1G35330 // AT5G39130 // AT5G38910 // AT1G61480 // AT1G36640 // AT2G13960 // AT1G26240 // AT1G52050 // AT1G36622 // AT4G07…
GO:0048046	C	apoplast	9	787	182	37767	0.017	0.95	// AT5G39130 // AT5G38910 // AT5G39150 // AT5G39110 // AT3G09440 // AT1G68765 // AT5G39120 // AT2G43570 // AT5G39160
GO:0008104	P	protein localization	6	787	408	37767	0.85	1	// AT2G46310 // AT3G61450 // AT2G34940 // AT3G61630 // AT2G18260 // AT5G66970
GO:0048583	P	regulation of response to stimulus	5	787	188	37767	0.36	1	// AT2G45130 // AT3G57300 // AT1G74710 // AT5G13080 // AT1G02450
GO:0009165	P	nucleotide biosynthetic process	5	787	122	37767	0.12	1	// AT5G14760 // AT2G07741 // AT3G63380 // AT2G07671 // AT2G07707
GO:0007165	P	signal transduction	29	787	1228	37767	0.28	1	// AT4G34930 // AT3G04210 // AT2G36890 // AT4G11340 // AT4G18450 // AT3G24500 // AT3G23010 // AT3G27473 // AT1G67710 // AT5G45000 // AT5G26900 // AT1G64480 // AT5G59940 // AT1G51270 // AT3G23240 // AT3G16360 // AT1G70510 // AT1G47890 // AT1G07390 // AT4G11390 // AT1G17240 // AT2G02950 // AT3G23120 // AT2G02690 // AT5G46260 // AT5G13320 // AT4G04220 // AT4G19925 // AT3G15500
GO:0009755	P	hormone-mediated signaling pathway	6	787	321	37767	0.66	1	// AT3G16360 // AT1G70510 // AT3G23240 // AT3G24500 // AT4G18450 // AT1G67710
GO:0009751	P	response to salicylic acid stimulus	5	787	200	37767	0.41	1	// AT2G36890 // AT3G09230 // AT5G13320 // AT1G15520 // AT3G01420
GO:0000003	P	reproduction	13	787	1186	37767	1	1	// AT1G70510 // AT1G69490 // AT2G46310 // AT3G61630 // AT5G22800 // AT5G49360 // AT5G41410 // AT1G68765 // AT2G02240 // AT4G35900 // AT1G61480 // AT5G10140 // AT2G46240
GO:0009753	P	response to jasmonic acid stimulus	5	787	215	37767	0.47	1	// AT3G15500 // AT3G23240 // AT4G35770 // AT1G15520 // AT2G36890
GO:0070727	P	cellular macromolecule localization	6	787	341	37767	0.71	1	// AT2G46310 // AT3G61450 // AT2G34940 // AT3G61630 // AT2G18260 // AT5G66970
GO:0009611	P	response to wounding	6	787	197	37767	0.24	1	// AT5G43570 // AT4G35770 // AT5G04230 // AT5G43580 // AT4G13300 // AT1G19660
GO:0048513	P	organ development	12	787	838	37767	0.93	1	// AT1G70510 // AT1G69490 // AT2G46310 // AT3G61630 // AT1G08100 // AT5G41410 // AT2G42620 // AT1G68765 // AT2G14210 // AT3G05630 // AT5G13080 // AT5G39610
GO:0016310	P	phosphorylation	27	787	1079	37767	0.2	1	// AT3G01490 // AT1G61480 // AT1G67000 // AT3G47110 // AT5G25450 // AT4G28350 // AT2G07671 // AT4G13190 // AT3G04530 // AT1G07550 // AT1G67520 // AT5G59260 // AT3G53590 // AT4G04540 // AT1G79680 // AT4G29450 // AT5G49780 // AT2G07689 // AT2G07741 // AT2G07707 // AT1G21230 // AT1G49620 // AT2G29220 // AT2G07687 // AT5G38240 // AT4G11890 // AT5G49770
GO:0048518	P	positive regulation of biological process	5	787	259	37767	0.63	1	// AT2G45130 // AT3G57300 // AT3G24500 // AT4G35900 // AT2G46240
GO:0048519	P	negative regulation of biological process	7	787	442	37767	0.81	1	// AT5G42750 // AT1G74710 // AT5G59710 // AT5G44610 // AT1G49620 // AT5G10140 // AT1G02450
GO:0034621	P	cellular macromolecular complex subunit organization	5	787	224	37767	0.5	1	// AT2G28720 // AT2G18050 // AT1G75600 // AT1G13370 // AT5G44610
GO:0033036	P	macromolecule localization	8	787	462	37767	0.75	1	// AT2G46310 // AT3G61450 // AT4G12480 // AT2G34940 // AT4G15160 // AT3G61630 // AT2G18260 // AT5G66970
GO:0032787	P	monocarboxylic acid metabolic process	6	787	408	37767	0.85	1	// AT5G13320 // AT1G74710 // AT1G10170 // AT3G21780 // AT2G43820 // AT3G01420
GO:0034645	P	cellular macromolecule biosynthetic process	81	787	3661	37767	0.3	1	// AT5G39810 // AT3G09230 // AT2G38340 // AT2G46310 // AT3G61630 // AT2G36890 // AT1G63210 // AT3G46070 // AT2G13960 // AT1G30650 // AT2G24700 // AT1G43640 // AT3G30720 // AT5G22890 // AT1G55110 // AT5G04150 // AT4G18300 // AT3G60490 // AT3G46080 // AT3G23240 // AT2G07715 // AT1G66730 // AT5G61590 // AT3G12730 // AT3G28500 // AT3G02400 // AT2G07734 // AT2G21900 // AT2G24680 // AT5G01200 // AT1G77…
GO:0003006	P	reproductive developmental process	12	787	978	37767	0.98	1	// AT1G70510 // AT1G69490 // AT2G46310 // AT3G61630 // AT5G22800 // AT5G49360 // AT5G41410 // AT1G68765 // AT2G02240 // AT4G35900 // AT5G10140 // AT2G46240
GO:0010038	P	response to metal ion	5	787	238	37767	0.55	1	// AT4G26560 // AT5G02490 // AT3G09440 // AT5G44460 // AT5G64250
GO:0043436	P	oxoacid metabolic process	17	787	859	37767	0.62	1	// AT5G13320 // AT1G64660 // AT1G74710 // AT1G50090 // AT4G13890 // AT2G43820 // AT5G22800 // AT1G05010 // AT1G44180 // AT1G15040 // AT1G36370 // AT5G38200 // AT1G10170 // AT1G17960 // AT3G21780 // AT5G54080 // AT3G01420
GO:0010033	P	response to organic substance	30	787	1342	37767	0.38	1	// AT1G75750 // AT5G16600 // AT3G09230 // AT1G67100 // AT2G36890 // AT5G22890 // AT3G24500 // AT3G46080 // AT5G13370 // AT1G67710 // AT5G51760 // AT3G50260 // AT1G17950 // AT1G15520 // AT1G62300 // AT3G16360 // AT1G70510 // AT4G01350 // AT2G26150 // AT3G21780 // AT3G01420 // AT5G13320 // AT5G63160 // AT3G23240 // AT2G17040 // AT1G68765 // AT3G15500 // AT3G05630 // AT4G18450 // AT4G35770
GO:0055114	P	oxidation reduction	5	787	203	37767	0.42	1	// AT2G07689 // AT5G25450 // AT1G32350 // AT2G07695 // AT2G07687
GO:0046483	P	heterocycle metabolic process	7	787	460	37767	0.84	1	// AT3G63380 // AT2G26550 // AT2G07707 // AT2G43820 // AT5G53970 // AT2G07671 // AT2G07741
GO:0044248	P	cellular catabolic process	21	787	746	37767	0.11	1	// AT2G02930 // AT1G64660 // AT5G48180 // AT2G26550 // AT1G24280 // AT4G02890 // AT1G78360 // AT2G29470 // AT5G62480 // AT3G16390 // AT2G42620 // AT1G17180 // AT3G05630 // AT2G29450 // AT4G26270 // AT4G12100 // AT3G60100 // AT3G21780 // AT5G54080 // AT1G02930 // AT3G01420
GO:0044249	P	cellular biosynthetic process	103	787	4925	37767	0.5	1	// AT1G30650 // AT4G18450 // AT4G18300 // AT5G24530 // AT2G07734 // AT5G42750 // AT2G40740 // AT1G77570 // AT2G40340 // AT1G25054 // AT5G59710 // AT1G31050 // AT1G05010 // AT2G22240 // AT3G57300 // AT3G10040 // AT5G15830 // AT2G07741 // AT4G33880 // AT2G26550 // AT1G13300 // AT2G28110 // AT5G53970 // AT3G50260 // AT3G06220 // AT3G61630 // AT2G36890 // AT1G63210 // AT2G13960 // AT1G43640 // AT3G24…
GO:0019538	P	protein metabolic process	58	787	4009	37767	1	1	// AT1G44130 // AT3G01490 // AT4G02390 // AT1G61480 // AT1G80920 // AT5G18340 // AT1G67000 // AT3G47110 // AT3G52490 // AT4G19570 // AT4G18300 // AT5G02490 // AT4G10510 // AT2G07734 // AT4G13190 // AT3G28500 // AT1G56300 // AT5G47590 // AT1G44180 // AT3G04530 // AT3G61390 // AT5G03030 // AT2G20560 // AT4G12100 // AT1G67520 // AT4G02890 // AT3G12220 // AT5G59260 // AT3G06455 // AT3G53590 // AT3G20…
GO:0016051	P	carbohydrate biosynthetic process	9	787	277	37767	0.13	1	// AT1G16410 // AT1G60470 // AT1G51420 // AT2G28110 // AT2G22240 // AT3G30720 // AT1G56600 // AT1G25054 // AT3G52340
GO:0007154	P	cell communication	8	787	1399	37767	1	1	// AT5G48850 // AT2G45130 // AT1G61480 // AT3G05630 // AT1G55920 // AT1G78000 // AT4G02380 // AT1G68740
GO:0022607	P	cellular component assembly	5	787	265	37767	0.65	1	// AT2G28720 // AT2G18050 // AT1G75600 // AT1G13370 // AT5G44610
GO:0006457	P	protein folding	10	787	275	37767	0.069	1	// AT2G35540 // AT1G71000 // AT2G21130 // AT4G19570 // AT1G56300 // AT3G09440 // AT5G03030 // AT2G20560 // AT1G80920 // AT5G02490
GO:0042742	P	defense response to bacterium	6	787	177	37767	0.17	1	// AT5G13320 // AT4G11650 // AT1G74710 // AT1G10170 // AT2G22240 // AT1G02450
GO:0043170	P	macromolecule metabolic process	144	787	7127	37767	0.67	1	// AT1G30650 // AT4G18450 // AT4G18300 // AT4G38780 // AT2G07734 // AT1G44180 // AT2G40740 // AT5G47590 // AT1G77570 // AT2G40340 // AT5G18340 // AT2G20560 // AT5G59710 // AT1G31050 // AT1G29860 // AT3G57300 // AT4G33880 // AT5G15830 // AT3G10040 // AT2G28110 // AT2G42620 // AT1G72350 // AT3G50260 // AT2G29220 // AT5G14360 // AT3G06220 // AT3G61630 // AT2G36890 // AT1G63210 // AT1G80920 // AT2G13…
GO:0044267	P	cellular protein metabolic process	48	787	3487	37767	1	1	// AT3G01490 // AT4G02390 // AT1G61480 // AT1G80920 // AT5G18340 // AT1G67000 // AT3G47110 // AT4G19570 // AT4G18300 // AT5G02490 // AT2G07734 // AT4G13190 // AT2G07715 // AT1G56300 // AT3G28500 // AT3G04530 // AT3G61390 // AT5G03030 // AT2G20560 // AT4G12100 // AT1G67520 // AT4G02890 // AT5G59260 // AT3G06455 // AT3G53590 // AT4G04540 // AT1G79680 // AT4G29450 // AT5G49780 // AT4G18330 // AT1G74…
GO:0051186	P	cofactor metabolic process	6	787	308	37767	0.62	1	// AT1G74710 // AT2G26550 // AT5G14760 // AT1G24280 // AT3G60100 // AT2G43820
GO:0044262	P	cellular carbohydrate metabolic process	12	787	417	37767	0.17	1	// AT1G16410 // AT3G30720 // AT4G26270 // AT5G48180 // AT1G51420 // AT2G28110 // AT2G22240 // AT3G16390 // AT3G02040 // AT1G25054 // AT3G52340 // AT1G24280
GO:0044260	P	cellular macromolecule metabolic process	132	787	6447	37767	0.6	1	// AT1G30650 // AT4G18450 // AT4G18300 // AT4G38780 // AT2G07734 // AT5G45990 // AT2G40740 // AT1G77570 // AT2G40340 // AT5G18340 // AT2G20560 // AT5G59710 // AT1G31050 // AT1G29860 // AT3G57300 // AT4G33880 // AT5G15830 // AT3G10040 // AT2G28110 // AT2G42620 // AT3G50260 // AT2G29220 // AT5G14360 // AT3G06220 // AT3G61630 // AT2G36890 // AT1G63210 // AT1G80920 // AT2G13960 // AT1G43640 // AT3G24…
GO:0006886	P	intracellular protein transport	6	787	311	37767	0.63	1	// AT2G46310 // AT3G61450 // AT2G34940 // AT3G61630 // AT2G18260 // AT5G66970
GO:0016043	P	cellular component organization	12	787	1179	37767	1	1	// AT1G75750 // AT1G13370 // AT5G07650 // AT4G13890 // AT5G44610 // AT5G07760 // AT5G39630 // AT2G18260 // AT2G28720 // AT5G15450 // AT1G75600 // AT2G18050
GO:0065003	P	macromolecular complex assembly	5	787	210	37767	0.45	1	// AT2G28720 // AT2G18050 // AT1G75600 // AT1G13370 // AT5G44610
GO:0065008	P	regulation of biological quality	10	787	665	37767	0.88	1	// AT1G75750 // AT1G69490 // AT2G24710 // AT5G42750 // AT5G47560 // AT2G42620 // AT2G36800 // AT2G03760 // AT5G39865 // AT2G04040
GO:0016265	P	death	7	787	286	37767	0.39	1	// AT3G46530 // AT2G17430 // AT3G04210 // AT5G45490 // AT5G46260 // AT2G46240 // AT3G01420
GO:0034613	P	cellular protein localization	6	787	322	37767	0.66	1	// AT2G46310 // AT3G61450 // AT2G34940 // AT3G61630 // AT2G18260 // AT5G66970
GO:0048316	P	seed development	5	787	530	37767	0.99	1	// AT3G61630 // AT2G46310 // AT5G49360 // AT5G22800 // AT2G02240
GO:0006629	P	lipid metabolic process	12	787	841	37767	0.93	1	// AT5G42750 // AT4G34930 // AT2G22240 // AT4G13300 // AT3G05630 // AT4G25700 // AT2G30550 // AT1G25054 // AT2G03760 // AT2G36800 // AT3G21780 // AT3G01420
GO:0009308	P	amine metabolic process	12	787	521	37767	0.41	1	// AT1G64660 // AT1G36370 // AT1G50090 // AT4G13890 // AT1G05010 // AT5G22800 // AT1G44180 // AT1G15040 // AT5G38200 // AT2G43820 // AT5G54080 // AT1G17960
GO:0006810	P	transport	46	787	1846	37767	0.13	1	// AT2G36950 // AT2G46310 // AT3G63380 // AT4G15160 // AT2G18180 // AT3G61450 // AT5G47450 // AT2G42620 // AT5G03380 // AT2G07671 // AT4G08620 // AT1G29100 // AT3G30842 // AT5G52350 // AT1G33110 // AT5G39630 // AT1G15170 // AT2G04050 // AT3G61630 // AT4G12480 // AT3G01760 // AT2G04070 // AT1G15520 // AT4G22790 // AT3G05400 // AT1G08100 // AT5G55470 // AT2G34940 // AT5G47560 // AT3G45720 // AT5G60…
GO:0012501	P	programmed cell death	5	787	244	37767	0.58	1	// AT3G46530 // AT5G45490 // AT5G46260 // AT2G46240 // AT3G04210
GO:0043412	P	macromolecule modification	29	787	1636	37767	0.83	1	// AT3G01490 // AT4G02390 // AT1G61480 // AT3G06455 // AT1G67000 // AT3G47110 // AT4G28350 // AT4G13190 // AT1G61470 // AT3G04530 // AT3G61390 // AT1G67520 // AT5G14360 // AT5G59260 // AT5G18340 // AT3G53590 // AT4G04540 // AT1G79680 // AT4G29450 // AT5G49780 // AT2G18600 // AT4G02890 // AT2G42620 // AT1G21230 // AT1G07550 // AT2G29220 // AT5G38240 // AT4G11890 // AT5G49770
GO:0008152	P	metabolic process	221	787	10614	37767	0.52	1	// AT1G64660 // AT1G50090 // AT2G30660 // AT1G30650 // AT4G18450 // AT4G18300 // AT4G38780 // AT5G24530 // AT3G21790 // AT2G07734 // AT5G42750 // AT1G24320 // AT1G44180 // AT2G40740 // AT2G07741 // AT5G47590 // AT1G77570 // AT2G03760 // AT2G40340 // AT5G54080 // AT2G36770 // AT5G18340 // AT1G25054 // AT5G59710 // AT1G31050 // AT1G05010 // AT2G22240 // AT3G57300 // AT4G33880 // AT5G15830 // AT3G21…
GO:0051234	P	establishment of localization	46	787	1851	37767	0.13	1	// AT2G36950 // AT2G46310 // AT3G63380 // AT4G15160 // AT2G18180 // AT3G61450 // AT5G47450 // AT2G42620 // AT5G03380 // AT2G07671 // AT4G08620 // AT1G29100 // AT3G30842 // AT5G52350 // AT1G33110 // AT5G39630 // AT1G15170 // AT2G04050 // AT3G61630 // AT4G12480 // AT3G01760 // AT2G04070 // AT1G15520 // AT4G22790 // AT3G05400 // AT1G08100 // AT5G55470 // AT2G34940 // AT5G47560 // AT3G45720 // AT5G60…
GO:0046907	P	intracellular transport	8	787	463	37767	0.75	1	// AT2G46310 // AT3G61450 // AT5G39630 // AT2G34940 // AT3G61630 // AT2G18260 // AT4G27370 // AT5G66970
GO:0009814	P	defense response, incompatible interaction	6	787	143	37767	0.086	1	// AT3G46530 // AT5G13320 // AT4G11650 // AT1G74710 // AT5G64890 // AT1G02450
GO:0006753	P	nucleoside phosphate metabolic process	6	787	180	37767	0.18	1	// AT3G63380 // AT2G07707 // AT1G24280 // AT5G14760 // AT2G07741 // AT2G07671
GO:0006732	P	coenzyme metabolic process	5	787	188	37767	0.36	1	// AT5G14760 // AT2G43820 // AT1G74710 // AT1G24280 // AT3G60100
GO:0009314	P	response to radiation	18	787	613	37767	0.099	1	// AT2G24710 // AT2G29500 // AT1G10170 // AT1G52560 // AT2G36890 // AT4G12400 // AT2G22240 // AT1G54050 // AT2G42620 // AT4G35900 // AT2G26150 // AT1G32870 // AT2G02950 // AT5G05410 // AT2G19310 // AT5G24470 // AT1G74310 // AT2G46240
GO:0042180	P	cellular ketone metabolic process	17	787	882	37767	0.66	1	// AT5G13320 // AT1G64660 // AT1G74710 // AT1G50090 // AT4G13890 // AT2G43820 // AT5G22800 // AT1G05010 // AT1G44180 // AT1G15040 // AT1G36370 // AT5G38200 // AT1G10170 // AT1G17960 // AT3G21780 // AT5G54080 // AT3G01420
GO:0009791	P	post-embryonic development	16	787	705	37767	0.4	1	// AT2G02240 // AT1G70510 // AT1G69490 // AT2G46310 // AT3G61630 // AT5G22800 // AT5G49360 // AT5G41410 // AT1G68765 // AT2G14210 // AT4G35900 // AT5G13080 // AT1G08100 // AT5G10140 // AT5G24470 // AT2G46240
GO:0009790	P	embryonic development	5	787	535	37767	0.99	1	// AT4G02380 // AT2G46310 // AT3G61630 // AT5G22800 // AT2G02240
GO:0009416	P	response to light stimulus	18	787	596	37767	0.082	1	// AT2G24710 // AT2G29500 // AT1G10170 // AT1G52560 // AT2G36890 // AT4G12400 // AT2G22240 // AT1G54050 // AT2G42620 // AT4G35900 // AT2G26150 // AT1G32870 // AT2G02950 // AT5G05410 // AT2G19310 // AT5G24470 // AT1G74310 // AT2G46240
GO:0070887	P	cellular response to chemical stimulus	11	787	452	37767	0.35	1	// AT3G16360 // AT1G70510 // AT5G13320 // AT3G23240 // AT3G15500 // AT3G24500 // AT4G18450 // AT3G56350 // AT2G26150 // AT4G02380 // AT1G67710
GO:0009719	P	response to endogenous stimulus	21	787	1068	37767	0.64	1	// AT3G16360 // AT1G70510 // AT1G67100 // AT1G75750 // AT5G51760 // AT5G63160 // AT2G36890 // AT4G35770 // AT3G23240 // AT1G68765 // AT3G15500 // AT3G05630 // AT4G18450 // AT3G24500 // AT5G16600 // AT5G13320 // AT1G17950 // AT3G21780 // AT1G15520 // AT5G13370 // AT1G67710
GO:0051179	P	localization	46	787	1922	37767	0.19	1	// AT2G36950 // AT2G46310 // AT3G63380 // AT4G15160 // AT2G18180 // AT3G61450 // AT5G47450 // AT2G42620 // AT5G03380 // AT2G07671 // AT4G08620 // AT1G29100 // AT3G30842 // AT5G52350 // AT1G33110 // AT5G39630 // AT1G15170 // AT2G04050 // AT3G61630 // AT4G12480 // AT3G01760 // AT2G04070 // AT1G15520 // AT4G22790 // AT3G05400 // AT1G08100 // AT5G55470 // AT2G34940 // AT5G47560 // AT3G45720 // AT5G60…
GO:0006508	P	proteolysis	12	787	810	37767	0.91	1	// AT1G44130 // AT3G20015 // AT2G42620 // AT5G47590 // AT1G44180 // AT4G12100 // AT3G10450 // AT4G10510 // AT4G02890 // AT3G12220 // AT3G12230 // AT4G11310
GO:0051641	P	cellular localization	9	787	569	37767	0.84	1	// AT2G46310 // AT5G52350 // AT3G61450 // AT5G39630 // AT2G34940 // AT3G61630 // AT2G18260 // AT4G27370 // AT5G66970
GO:0015672	P	monovalent inorganic cation transport	5	787	115	37767	0.1	1	// AT2G07741 // AT5G55470 // AT2G07671 // AT2G07707 // AT5G47560
GO:0032502	P	developmental process	38	787	2304	37767	0.94	1	// AT1G75750 // AT2G46310 // AT5G14000 // AT5G41090 // AT5G22800 // AT5G49360 // AT2G02240 // AT4G35900 // AT5G44610 // AT1G68765 // AT1G32870 // AT5G24470 // AT1G52880 // AT4G35770 // AT1G02230 // AT3G29035 // AT3G61630 // AT5G39610 // AT5G10140 // AT1G28470 // AT1G70510 // AT1G08100 // AT1G63180 // AT2G14210 // AT4G02380 // AT5G13080 // AT2G46240 // AT1G69490 // AT3G04420 // AT3G60140 // AT4G13…
GO:0032501	P	multicellular organismal process	36	787	2094	37767	0.9	1	// AT2G46310 // AT5G14000 // AT5G41090 // AT5G22800 // AT5G49360 // AT2G02240 // AT4G35900 // AT1G68765 // AT1G32870 // AT5G24470 // AT1G52880 // AT1G02230 // AT3G29035 // AT3G61630 // AT5G39610 // AT1G61480 // AT5G10140 // AT1G28470 // AT1G70510 // AT1G08100 // AT1G63180 // AT2G14210 // AT4G02380 // AT2G02950 // AT5G13080 // AT2G46240 // AT1G69490 // AT3G04420 // AT4G13890 // AT5G63160 // AT2G17…
GO:0048608	P	reproductive structure development	12	787	978	37767	0.98	1	// AT1G70510 // AT1G69490 // AT2G46310 // AT3G61630 // AT5G22800 // AT5G49360 // AT5G41410 // AT1G68765 // AT2G02240 // AT4G35900 // AT5G10140 // AT2G46240
GO:0045184	P	establishment of protein localization	6	787	381	37767	0.8	1	// AT2G46310 // AT3G61450 // AT2G34940 // AT3G61630 // AT2G18260 // AT5G66970
GO:0043687	P	post-translational protein modification	25	787	1248	37767	0.61	1	// AT3G01490 // AT4G02390 // AT1G61480 // AT1G67000 // AT3G47110 // AT4G28350 // AT4G13190 // AT3G04530 // AT3G61390 // AT1G67520 // AT5G59260 // AT5G18340 // AT3G53590 // AT4G04540 // AT1G79680 // AT4G29450 // AT5G49780 // AT2G18600 // AT2G42620 // AT1G21230 // AT1G07550 // AT2G29220 // AT5G38240 // AT4G11890 // AT5G49770
GO:0009987	P	cellular process	249	787	11684	37767	0.35	1	// AT1G75750 // AT1G64660 // AT1G67520 // AT1G50090 // AT3G04210 // AT3G61450 // AT1G30650 // AT4G18450 // AT1G71140 // AT4G18300 // AT4G38780 // AT5G24530 // AT2G07734 // AT5G42750 // AT3G30842 // AT5G07650 // AT2G17430 // AT5G45990 // AT2G40740 // AT5G26900 // AT1G15170 // AT2G28720 // AT1G51270 // AT1G77570 // AT2G40340 // AT5G54080 // AT3G16360 // AT5G18340 // AT3G16390 // AT3G05400 // AT5G59…
GO:0006725	P	cellular aromatic compound metabolic process	7	787	399	37767	0.72	1	// AT5G13320 // AT1G74710 // AT1G10170 // AT1G67980 // AT5G24530 // AT2G43820 // AT5G54080
GO:0034637	P	cellular carbohydrate biosynthetic process	7	787	177	37767	0.084	1	// AT1G16410 // AT1G51420 // AT2G28110 // AT2G22240 // AT3G30720 // AT1G25054 // AT3G52340
GO:0032870	P	cellular response to hormone stimulus	6	787	321	37767	0.66	1	// AT3G16360 // AT1G70510 // AT3G23240 // AT3G24500 // AT4G18450 // AT1G67710
GO:0009409	P	response to cold	5	787	328	37767	0.81	1	// AT4G02380 // AT5G10140 // AT2G18260 // AT1G55920 // AT2G46240
GO:0044255	P	cellular lipid metabolic process	7	787	618	37767	0.97	1	// AT2G22240 // AT4G13300 // AT3G05630 // AT4G25700 // AT1G25054 // AT3G21780 // AT3G01420
GO:0055086	P	nucleobase, nucleoside and nucleotide metabolic process	6	787	221	37767	0.32	1	// AT3G63380 // AT2G07707 // AT1G24280 // AT5G14760 // AT2G07741 // AT2G07671
GO:0010154	P	fruit development	5	787	557	37767	0.99	1	// AT3G61630 // AT2G46310 // AT5G49360 // AT5G22800 // AT2G02240
GO:0007568	P	aging	5	787	110	37767	0.087	1	// AT1G69490 // AT4G35770 // AT3G60140 // AT2G42620 // AT5G39610
GO:0006082	P	organic acid metabolic process	17	787	860	37767	0.62	1	// AT5G13320 // AT1G64660 // AT1G74710 // AT1G50090 // AT4G13890 // AT2G43820 // AT5G22800 // AT1G05010 // AT1G44180 // AT1G15040 // AT1G36370 // AT5G38200 // AT1G10170 // AT1G17960 // AT3G21780 // AT5G54080 // AT3G01420
GO:0007242	P	intracellular signaling cascade	16	787	659	37767	0.31	1	// AT3G16360 // AT1G70510 // AT2G02950 // AT4G11390 // AT2G36890 // AT5G13320 // AT1G64480 // AT5G59940 // AT3G15500 // AT4G18450 // AT3G24500 // AT4G34930 // AT2G02690 // AT3G27473 // AT3G23240 // AT1G67710
GO:0009725	P	response to hormone stimulus	19	787	982	37767	0.66	1	// AT3G16360 // AT1G70510 // AT1G67100 // AT1G75750 // AT5G51760 // AT5G63160 // AT2G36890 // AT5G13320 // AT3G23240 // AT1G68765 // AT3G05630 // AT4G18450 // AT3G24500 // AT5G16600 // AT1G17950 // AT3G21780 // AT1G15520 // AT5G13370 // AT1G67710
GO:0009723	P	response to ethylene stimulus	6	787	199	37767	0.24	1	// AT4G18450 // AT1G70510 // AT1G68765 // AT3G23240 // AT3G24500 // AT1G15520
GO:0048731	P	system development	12	787	839	37767	0.93	1	// AT1G70510 // AT1G69490 // AT2G46310 // AT3G61630 // AT1G08100 // AT5G41410 // AT2G42620 // AT1G68765 // AT2G14210 // AT3G05630 // AT5G13080 // AT5G39610
GO:0016137	P	glycoside metabolic process	5	787	104	37767	0.073	1	// AT1G16410 // AT1G51420 // AT3G52340 // AT3G16390 // AT5G48180
GO:0043933	P	macromolecular complex subunit organization	5	787	235	37767	0.54	1	// AT2G28720 // AT2G18050 // AT1G75600 // AT1G13370 // AT5G44610
GO:0019752	P	carboxylic acid metabolic process	17	787	859	37767	0.62	1	// AT5G13320 // AT1G64660 // AT1G74710 // AT1G50090 // AT4G13890 // AT2G43820 // AT5G22800 // AT1G05010 // AT1G44180 // AT1G15040 // AT1G36370 // AT5G38200 // AT1G10170 // AT1G17960 // AT3G21780 // AT5G54080 // AT3G01420
GO:0015031	P	protein transport	6	787	381	37767	0.8	1	// AT2G46310 // AT3G61450 // AT2G34940 // AT3G61630 // AT2G18260 // AT5G66970
GO:0034622	P	cellular macromolecular complex assembly	5	787	200	37767	0.41	1	// AT2G28720 // AT2G18050 // AT1G75600 // AT1G13370 // AT5G44610
GO:0008219	P	cell death	7	787	286	37767	0.39	1	// AT3G46530 // AT2G17430 // AT3G04210 // AT5G45490 // AT5G46260 // AT2G46240 // AT3G01420
GO:0007275	P	multicellular organismal development	34	787	2020	37767	0.92	1	// AT2G46310 // AT5G14000 // AT5G41090 // AT5G22800 // AT5G49360 // AT2G02240 // AT4G35900 // AT1G68765 // AT1G32870 // AT5G24470 // AT1G52880 // AT1G02230 // AT3G29035 // AT3G61630 // AT5G39610 // AT5G10140 // AT1G28470 // AT1G70510 // AT1G08100 // AT1G63180 // AT2G14210 // AT4G02380 // AT5G13080 // AT2G46240 // AT1G69490 // AT3G04420 // AT4G13890 // AT5G63160 // AT2G17040 // AT5G41410 // AT2G42…
GO:0009737	P	response to abscisic acid stimulus	7	787	378	37767	0.67	1	// AT1G75750 // AT5G16600 // AT5G51760 // AT2G36890 // AT3G24500 // AT1G17950 // AT3G21780
GO:0044265	P	cellular macromolecule catabolic process	7	787	465	37767	0.85	1	// AT5G48180 // AT4G02890 // AT2G42620 // AT3G16390 // AT4G26270 // AT4G12100 // AT1G24280
GO:0006520	P	cellular amino acid metabolic process	12	787	430	37767	0.2	1	// AT1G64660 // AT1G36370 // AT1G50090 // AT4G13890 // AT1G05010 // AT5G22800 // AT1G44180 // AT1G15040 // AT5G38200 // AT2G43820 // AT5G54080 // AT1G17960
GO:0010467	P	gene expression	81	787	3962	37767	0.59	1	// AT2G46310 // AT3G09230 // AT2G38340 // AT5G16600 // AT3G61630 // AT2G36890 // AT1G63210 // AT3G46070 // AT2G13960 // AT1G30650 // AT2G24700 // AT1G43640 // AT3G09290 // AT3G28500 // AT5G22890 // AT1G55110 // AT5G04150 // AT4G18300 // AT4G38780 // AT3G60490 // AT3G46080 // AT3G23240 // AT2G07715 // AT5G61590 // AT3G12730 // AT5G01200 // AT3G02400 // AT2G07734 // AT3G13210 // AT2G24680 // AT5G45…
GO:0051704	P	multi-organism process	23	787	776	37767	0.064	1	// AT5G64250 // AT1G61480 // AT5G02490 // AT5G24530 // AT1G74710 // AT1G10170 // AT3G50460 // AT4G12480 // AT3G01420 // AT4G11650 // AT5G24540 // AT1G05010 // AT2G22240 // AT3G53160 // AT1G02450 // AT3G60160 // AT2G46240 // AT3G46530 // AT5G13320 // AT3G50470 // AT5G64890 // AT2G26820 // AT1G33890
GO:0009908	P	flower development	6	787	377	37767	0.8	1	// AT1G70510 // AT1G69490 // AT5G41410 // AT1G68765 // AT4G35900 // AT5G10140
GO:0006468	P	protein amino acid phosphorylation	20	787	946	37767	0.51	1	// AT3G01490 // AT4G13190 // AT3G53590 // AT4G04540 // AT1G61480 // AT1G21230 // AT4G29450 // AT5G49780 // AT3G47110 // AT3G04530 // AT1G07550 // AT1G79680 // AT2G29220 // AT4G28350 // AT1G67520 // AT5G38240 // AT1G67000 // AT4G11890 // AT5G49770 // AT5G59260
GO:0045087	P	innate immune response	12	787	347	37767	0.067	1	// AT3G46530 // AT5G13320 // AT4G11650 // AT1G74710 // AT3G04210 // AT4G11340 // AT4G19925 // AT1G51270 // AT5G64890 // AT1G02450 // AT5G46260 // AT5G45000
GO:0006464	P	protein modification process	28	787	1474	37767	0.72	1	// AT3G01490 // AT4G02390 // AT1G61480 // AT3G06455 // AT1G67000 // AT3G47110 // AT4G28350 // AT4G13190 // AT3G04530 // AT3G61390 // AT1G67520 // AT5G14360 // AT5G59260 // AT5G18340 // AT3G53590 // AT4G04540 // AT1G79680 // AT4G29450 // AT5G49780 // AT2G18600 // AT4G02890 // AT2G42620 // AT1G21230 // AT1G07550 // AT2G29220 // AT5G38240 // AT4G11890 // AT5G49770
GO:0022414	P	reproductive process	13	787	1161	37767	1	1	// AT1G70510 // AT1G69490 // AT2G46310 // AT3G61630 // AT5G22800 // AT5G49360 // AT5G41410 // AT1G68765 // AT2G02240 // AT4G35900 // AT1G61480 // AT5G10140 // AT2G46240
GO:0009058	P	biosynthetic process	105	787	5118	37767	0.58	1	// AT1G30650 // AT4G18450 // AT4G18300 // AT5G24530 // AT2G07734 // AT5G42750 // AT2G40740 // AT1G77570 // AT2G40340 // AT1G25054 // AT5G59710 // AT1G31050 // AT1G05010 // AT2G22240 // AT3G57300 // AT3G10040 // AT5G15830 // AT2G07741 // AT4G33880 // AT2G26550 // AT1G13300 // AT2G28110 // AT5G53970 // AT1G56600 // AT3G50260 // AT3G06220 // AT3G61630 // AT2G36890 // AT1G63210 // AT2G13960 // AT1G43…
GO:0009059	P	macromolecule biosynthetic process	81	787	3685	37767	0.33	1	// AT5G39810 // AT3G09230 // AT2G38340 // AT2G46310 // AT3G61630 // AT2G36890 // AT1G63210 // AT3G46070 // AT2G13960 // AT1G30650 // AT2G24700 // AT1G43640 // AT3G30720 // AT5G22890 // AT1G55110 // AT5G04150 // AT4G18300 // AT3G60490 // AT3G46080 // AT3G23240 // AT2G07715 // AT1G66730 // AT5G61590 // AT3G12730 // AT3G28500 // AT3G02400 // AT2G07734 // AT2G21900 // AT2G24680 // AT5G01200 // AT1G77…
GO:0009117	P	nucleotide metabolic process	6	787	180	37767	0.18	1	// AT3G63380 // AT2G07707 // AT1G24280 // AT5G14760 // AT2G07741 // AT2G07671
GO:0051649	P	establishment of localization in cell	9	787	525	37767	0.76	1	// AT2G46310 // AT5G52350 // AT3G61450 // AT5G39630 // AT2G34940 // AT3G61630 // AT2G18260 // AT4G27370 // AT5G66970
GO:0009056	P	catabolic process	24	787	1307	37767	0.76	1	// AT1G64660 // AT2G42620 // AT1G17180 // AT2G29470 // AT3G05630 // AT2G29450 // AT4G26270 // AT4G12100 // AT4G02890 // AT5G54080 // AT1G02930 // AT5G48180 // AT3G16150 // AT5G62480 // AT3G21780 // AT3G01420 // AT2G02930 // AT2G26550 // AT1G24280 // AT1G78360 // AT3G16390 // AT2G43570 // AT3G60100 // AT2G43590
GO:0009057	P	macromolecule catabolic process	8	787	982	37767	1	1	// AT5G48180 // AT3G16150 // AT4G02890 // AT3G16390 // AT2G42620 // AT4G26270 // AT4G12100 // AT1G24280
GO:0006091	P	generation of precursor metabolites and energy	9	787	285	37767	0.15	1	// AT2G07707 // AT2G07671 // AT3G60100 // AT5G25450 // AT4G26270 // AT2G07687 // AT2G07689 // AT2G07695 // AT2G07741
GO:0008610	P	lipid biosynthetic process	6	787	439	37767	0.89	1	// AT5G42750 // AT2G22240 // AT4G13300 // AT3G05630 // AT4G25700 // AT1G25054
GO:0006996	P	organelle organization	9	787	640	37767	0.92	1	// AT1G13370 // AT5G07650 // AT4G13890 // AT5G44610 // AT5G07760 // AT2G28720 // AT5G15450 // AT1G75600 // AT2G18050
GO:0044238	P	primary metabolic process	179	787	8995	37767	0.77	1	// AT1G64660 // AT1G50090 // AT1G30650 // AT4G18450 // AT4G18300 // AT4G38780 // AT5G24530 // AT2G07734 // AT5G42750 // AT1G24320 // AT1G44180 // AT2G40740 // AT2G07741 // AT5G47590 // AT1G77570 // AT2G03760 // AT2G40340 // AT5G54080 // AT5G18340 // AT1G25054 // AT5G59710 // AT1G31050 // AT1G29860 // AT1G05010 // AT2G22240 // AT3G57300 // AT4G33880 // AT5G15830 // AT3G21780 // AT3G10040 // AT2G07…
GO:0006519	P	cellular amino acid and derivative metabolic process	14	787	682	37767	0.56	1	// AT1G64660 // AT1G36370 // AT1G50090 // AT4G13890 // AT1G05010 // AT5G22800 // AT1G44180 // AT1G15040 // AT5G38200 // AT1G67980 // AT5G24530 // AT2G43820 // AT5G54080 // AT1G17960
GO:0005975	P	carbohydrate metabolic process	19	787	866	37767	0.44	1	// AT1G16410 // AT3G47050 // AT1G80160 // AT4G26270 // AT4G19720 // AT5G48180 // AT1G51420 // AT2G28110 // AT2G22240 // AT3G16390 // AT3G02040 // AT1G56600 // AT1G24320 // AT1G60470 // AT1G25054 // AT3G52340 // AT4G19750 // AT1G24280 // AT3G30720
GO:0009743	P	response to carbohydrate stimulus	8	787	240	37767	0.14	1	// AT4G18450 // AT4G01350 // AT2G17040 // AT5G22890 // AT2G26150 // AT3G50260 // AT3G46080 // AT1G62300
GO:0044106	P	cellular amine metabolic process	12	787	438	37767	0.21	1	// AT1G64660 // AT1G36370 // AT1G50090 // AT4G13890 // AT1G05010 // AT5G22800 // AT1G44180 // AT1G15040 // AT5G38200 // AT2G43820 // AT5G54080 // AT1G17960
GO:0048856	P	anatomical structure development	20	787	1726	37767	1	1	// AT1G75750 // AT1G70510 // AT1G69490 // AT2G46310 // AT3G61630 // AT5G22800 // AT5G49360 // AT5G41410 // AT2G42620 // AT1G68765 // AT2G14210 // AT4G35900 // AT5G44610 // AT3G05630 // AT5G13080 // AT5G39610 // AT1G08100 // AT5G10140 // AT2G02240 // AT2G46240
GO:0044237	P	cellular metabolic process	182	787	8722	37767	0.51	1	// AT1G64660 // AT1G50090 // AT1G30650 // AT4G18450 // AT4G18300 // AT4G38780 // AT5G24530 // AT2G07734 // AT5G42750 // AT1G44180 // AT2G40740 // AT2G07741 // AT1G77570 // AT2G40340 // AT5G54080 // AT5G18340 // AT1G25054 // AT5G59710 // AT1G31050 // AT1G05010 // AT2G22240 // AT3G57300 // AT4G33880 // AT5G15830 // AT3G21780 // AT4G18330 // AT3G10040 // AT2G26550 // AT1G13300 // AT2G28110 // AT5G53…
GO:0006066	P	alcohol metabolic process	5	787	270	37767	0.66	1	// AT3G02040 // AT1G24280 // AT2G22240 // AT4G13300 // AT4G26270
GO:0006796	P	phosphate metabolic process	27	787	1178	37767	0.34	1	// AT3G01490 // AT1G61480 // AT1G67000 // AT3G47110 // AT5G25450 // AT4G28350 // AT2G07671 // AT4G13190 // AT3G04530 // AT1G07550 // AT1G67520 // AT5G59260 // AT3G53590 // AT4G04540 // AT1G79680 // AT4G29450 // AT5G49780 // AT2G07689 // AT2G07741 // AT2G07707 // AT1G21230 // AT1G49620 // AT2G29220 // AT2G07687 // AT5G38240 // AT4G11890 // AT5G49770
GO:0044085	P	cellular component biogenesis	6	787	571	37767	0.98	1	// AT1G13370 // AT2G28110 // AT2G28720 // AT5G44610 // AT1G75600 // AT2G18050
GO:0006790	P	sulfur metabolic process	8	787	220	37767	0.097	1	// AT1G16410 // AT5G48180 // AT1G64660 // AT1G62180 // AT1G05010 // AT3G16390 // AT5G09290 // AT4G21990
GO:0006793	P	phosphorus metabolic process	27	787	1179	37767	0.34	1	// AT3G01490 // AT1G61480 // AT1G67000 // AT3G47110 // AT5G25450 // AT4G28350 // AT2G07671 // AT4G13190 // AT3G04530 // AT1G07550 // AT1G67520 // AT5G59260 // AT3G53590 // AT4G04540 // AT1G79680 // AT4G29450 // AT5G49780 // AT2G07689 // AT2G07741 // AT2G07707 // AT1G21230 // AT1G49620 // AT2G29220 // AT2G07687 // AT5G38240 // AT4G11890 // AT5G49770
GO:0006259	P	DNA metabolic process	5	787	405	37767	0.92	1	// AT3G57300 // AT1G66730 // AT2G30350 // AT1G05055 // AT5G59710
GO:0006412	P	translation	8	787	1445	37767	1	1	// AT2G07725 // AT2G07715 // AT5G22800 // AT3G28500 // AT4G18330 // AT4G18300 // AT2G07734 // AT1G17960
GO:0048523	P	negative regulation of cellular process	5	787	234	37767	0.54	1	// AT1G02450 // AT5G42750 // AT1G49620 // AT5G59710 // AT5G44610
GO:0046983	F	protein dimerization activity	6	787	144	37767	0.088	1	// AT5G42750 // AT1G63180 // AT3G29035 // AT3G16050 // AT5G39610 // AT2G19960
GO:0042578	F	phosphoric ester hydrolase activity	10	787	481	37767	0.55	1	// AT5G51760 // AT1G51420 // AT2G40180 // AT5G09290 // AT1G43640 // AT3G02040 // AT3G09400 // AT3G05630 // AT4G34930 // AT3G52340
GO:0070011	F	peptidase activity, acting on L-amino acid peptides	9	787	579	37767	0.85	1	// AT1G44130 // AT3G20015 // AT5G47590 // AT1G44180 // AT3G10450 // AT4G10510 // AT3G12220 // AT3G12230 // AT4G11310
GO:0060089	F	molecular transducer activity	11	787	422	37767	0.27	1	// AT3G16360 // AT5G45000 // AT3G04210 // AT5G26900 // AT5G39630 // AT4G11340 // AT4G19925 // AT1G51270 // AT5G46260 // AT5G24470 // AT1G67710
GO:0016746	F	transferase activity, transferring acyl groups	10	787	324	37767	0.15	1	// AT3G29670 // AT5G47950 // AT3G60100 // AT3G26820 // AT1G67220 // AT1G55920 // AT5G39090 // AT3G50280 // AT5G39050 // AT5G42830
GO:0016747	F	transferase activity, transferring acyl groups other than amino-acyl groups	9	787	290	37767	0.16	1	// AT3G29670 // AT5G47950 // AT3G26820 // AT1G67220 // AT1G55920 // AT5G39090 // AT3G50280 // AT5G39050 // AT5G42830
GO:0030554	F	adenyl nucleotide binding	35	787	1465	37767	0.23	1	// AT3G04210 // AT3G20040 // AT1G61480 // AT3G09440 // AT1G67000 // AT3G47110 // AT4G28350 // AT5G02490 // AT1G43910 // AT1G66730 // AT4G13190 // AT1G26410 // AT3G28540 // AT1G26380 // AT5G15450 // AT1G30700 // AT1G67520 // AT2G18193 // AT5G59260 // AT3G53590 // AT5G17760 // AT1G74310 // AT5G49780 // AT3G57300 // AT5G40010 // AT5G46260 // AT4G16680 // AT2G18600 // AT1G26420 // AT3G28510 // AT5G45…
GO:0016563	F	transcription activator activity	6	787	177	37767	0.17	1	// AT4G18450 // AT4G35900 // AT3G23240 // AT5G05410 // AT3G24500 // AT1G28470
GO:0003723	F	RNA binding	5	787	1379	37767	1	1	// AT1G63210 // AT5G07060 // AT2G07734 // AT1G09320 // AT5G53680
GO:0016758	F	transferase activity, transferring hexosyl groups	11	787	340	37767	0.11	1	// AT2G36770 // AT1G60470 // AT3G21780 // AT1G22370 // AT2G28110 // AT1G56600 // AT2G36800 // AT1G05680 // AT4G01970 // AT3G21790 // AT2G43820
GO:0005525	F	GTP binding	6	787	249	37767	0.42	1	// AT1G60500 // AT5G25230 // AT1G02430 // AT4G18330 // AT5G66970 // AT1G33890
GO:0016874	F	ligase activity	11	787	564	37767	0.63	1	// AT3G54780 // AT2G18600 // AT5G18340 // AT1G36180 // AT2G42620 // AT4G28270 // AT3G61390 // AT5G49665 // AT1G66730 // AT2G22680 // AT1G17960
GO:0008270	F	zinc ion binding	33	787	1299	37767	0.15	1	// AT5G49200 // AT4G28270 // AT2G25410 // AT5G16960 // AT2G46495 // AT3G27473 // AT3G46080 // AT3G54780 // AT1G26800 // AT5G59940 // AT2G34000 // AT5G07060 // AT5G49665 // AT1G14200 // AT4G01350 // AT3G24070 // AT3G46070 // AT5G42840 // AT2G02690 // AT5G60250 // AT2G19610 // AT3G23060 // AT3G09290 // AT1G74870 // AT1G55110 // AT5G56200 // AT1G68130 // AT4G09110 // AT2G35910 // AT2G28710 // AT1G49…
GO:0016881	F	acid-amino acid ligase activity	8	787	364	37767	0.49	1	// AT3G54780 // AT2G18600 // AT5G18340 // AT4G28270 // AT2G42620 // AT3G61390 // AT5G49665 // AT2G22680
GO:0003676	F	nucleic acid binding	106	787	4842	37767	0.31	1	// AT5G14000 // AT1G30650 // AT4G35900 // AT4G18450 // AT5G53680 // AT4G18300 // AT2G07734 // AT5G25230 // AT2G40740 // AT2G28720 // AT1G77570 // AT5G02320 // AT5G39610 // AT2G40340 // AT1G31050 // AT2G14210 // AT2G26150 // AT2G42330 // AT5G15830 // AT2G28700 // AT4G33880 // AT1G13300 // AT5G41410 // AT3G50260 // AT3G06220 // AT1G49900 // AT3G61630 // AT2G36890 // AT1G63210 // AT2G13960 // AT3G24…
GO:0008168	F	methyltransferase activity	7	787	273	37767	0.35	1	// AT1G36370 // AT4G13890 // AT1G66700 // AT2G43920 // AT3G44840 // AT1G67980 // AT5G38100
GO:0042623	F	ATPase activity, coupled	10	787	359	37767	0.22	1	// AT3G63380 // AT5G61730 // AT1G30420 // AT5G61700 // AT3G13090 // AT3G13080 // AT3G60970 // AT3G60160 // AT4G16680 // AT1G15520
GO:0017076	F	purine nucleotide binding	41	787	1713	37767	0.21	1	// AT3G04210 // AT3G20040 // AT1G61480 // AT3G09440 // AT1G67000 // AT3G47110 // AT4G28350 // AT5G02490 // AT1G43910 // AT1G66730 // AT1G60500 // AT5G25230 // AT1G26410 // AT3G28540 // AT1G26380 // AT5G15450 // AT1G30700 // AT1G67520 // AT2G18193 // AT5G59260 // AT3G53590 // AT5G17760 // AT1G02430 // AT1G74310 // AT5G49780 // AT3G57300 // AT4G18330 // AT4G13190 // AT5G40010 // AT5G46260 // AT4G16…
GO:0005524	F	ATP binding	31	787	1377	37767	0.36	1	// AT3G04210 // AT3G20040 // AT1G61480 // AT3G09440 // AT1G67000 // AT3G47110 // AT4G28350 // AT5G02490 // AT1G43910 // AT1G66730 // AT4G13190 // AT3G28540 // AT5G15450 // AT1G67520 // AT2G18193 // AT5G59260 // AT3G53590 // AT5G17760 // AT1G74310 // AT5G49780 // AT3G57300 // AT5G40010 // AT5G46260 // AT4G16680 // AT2G18600 // AT3G28510 // AT5G45490 // AT5G38240 // AT4G11890 // AT5G49770 // AT1G17…
GO:0016787	F	hydrolase activity	72	787	3468	37767	0.53	1	// AT1G44130 // AT1G24320 // AT3G63380 // AT4G34930 // AT4G19750 // AT1G30420 // AT1G63210 // AT4G11310 // AT2G30550 // AT1G43640 // AT3G09400 // AT5G06570 // AT4G01970 // AT4G10510 // AT3G60120 // AT2G07671 // AT2G07707 // AT3G03500 // AT3G47050 // AT1G15040 // AT1G60500 // AT1G61470 // AT1G53990 // AT5G25230 // AT1G44180 // AT4G27370 // AT5G49360 // AT3G28540 // AT5G47590 // AT5G15450 // AT3G13…
GO:0016788	F	hydrolase activity, acting on ester bonds	18	787	1200	37767	0.94	1	// AT5G09290 // AT3G02040 // AT1G61470 // AT1G53990 // AT5G51760 // AT1G51420 // AT2G40180 // AT3G56170 // AT2G30550 // AT1G43640 // AT5G20860 // AT3G09400 // AT3G05630 // AT2G30350 // AT4G34930 // AT3G52340 // AT1G63210 // AT3G03500
GO:0004842	F	ubiquitin-protein ligase activity	8	787	324	37767	0.37	1	// AT3G54780 // AT2G18600 // AT5G18340 // AT4G28270 // AT2G42620 // AT3G61390 // AT5G49665 // AT2G22680
GO:0016773	F	phosphotransferase activity, alcohol group as acceptor	18	787	1154	37767	0.92	1	// AT3G01490 // AT4G13190 // AT3G53590 // AT3G20040 // AT1G61480 // AT1G17240 // AT1G21230 // AT1G67000 // AT5G49780 // AT3G47110 // AT3G04530 // AT4G26270 // AT4G28350 // AT1G67520 // AT5G38240 // AT4G11890 // AT5G49770 // AT5G59260
GO:0016772	F	transferase activity, transferring phosphorus-containing groups	32	787	1887	37767	0.9	1	// AT3G01490 // AT3G20040 // AT1G61480 // AT4G28350 // AT1G67000 // AT3G47110 // AT2G23030 // AT4G18300 // AT4G13190 // AT5G25110 // AT3G04530 // AT4G26270 // AT1G67520 // AT5G59260 // AT3G16360 // AT1G47890 // AT3G53590 // AT4G04540 // AT1G17240 // AT1G79680 // AT4G29450 // AT5G49780 // AT3G23000 // AT3G23120 // AT4G04220 // AT2G40520 // AT1G21230 // AT1G07550 // AT2G29220 // AT5G38240 // AT4G11…
GO:0016301	F	kinase activity	30	787	1641	37767	0.79	1	// AT3G01490 // AT3G20040 // AT1G61480 // AT1G67000 // AT3G47110 // AT2G23030 // AT4G28350 // AT4G13190 // AT5G25110 // AT3G04530 // AT4G26270 // AT1G67520 // AT5G59260 // AT3G16360 // AT1G47890 // AT3G53590 // AT4G04540 // AT1G17240 // AT1G79680 // AT4G29450 // AT5G49780 // AT3G23000 // AT3G23120 // AT4G04220 // AT1G21230 // AT1G07550 // AT2G29220 // AT5G38240 // AT4G11890 // AT5G49770
GO:0032555	F	purine ribonucleotide binding	37	787	1631	37767	0.32	1	// AT3G04210 // AT3G20040 // AT1G61480 // AT3G09440 // AT1G67000 // AT3G47110 // AT4G28350 // AT5G02490 // AT1G43910 // AT1G66730 // AT1G60500 // AT5G25230 // AT3G28540 // AT5G15450 // AT1G67520 // AT2G18193 // AT5G59260 // AT3G53590 // AT5G17760 // AT1G02430 // AT1G74310 // AT5G49780 // AT3G57300 // AT4G18330 // AT4G13190 // AT5G40010 // AT5G46260 // AT4G16680 // AT2G18600 // AT5G45490 // AT1G33…
GO:0032553	F	ribonucleotide binding	37	787	1631	37767	0.32	1	// AT3G04210 // AT3G20040 // AT1G61480 // AT3G09440 // AT1G67000 // AT3G47110 // AT4G28350 // AT5G02490 // AT1G43910 // AT1G66730 // AT1G60500 // AT5G25230 // AT3G28540 // AT5G15450 // AT1G67520 // AT2G18193 // AT5G59260 // AT3G53590 // AT5G17760 // AT1G02430 // AT1G74310 // AT5G49780 // AT3G57300 // AT4G18330 // AT4G13190 // AT5G40010 // AT5G46260 // AT4G16680 // AT2G18600 // AT5G45490 // AT1G33…
GO:0016791	F	phosphatase activity	6	787	407	37767	0.85	1	// AT5G51760 // AT1G51420 // AT2G40180 // AT3G09400 // AT5G09290 // AT3G52340
GO:0004857	F	enzyme inhibitor activity	6	787	173	37767	0.16	1	// AT5G43570 // AT2G02120 // AT5G43580 // AT5G20860 // AT1G49620 // AT1G73260
GO:0016829	F	lyase activity	5	787	430	37767	0.94	1	// AT1G64660 // AT1G80160 // AT2G07732 // AT5G01320 // AT5G04230
GO:0032561	F	guanyl ribonucleotide binding	6	787	249	37767	0.42	1	// AT1G60500 // AT5G25230 // AT1G02430 // AT4G18330 // AT5G66970 // AT1G33890
GO:0016879	F	ligase activity, forming carbon-nitrogen bonds	8	787	423	37767	0.66	1	// AT3G54780 // AT2G18600 // AT5G18340 // AT4G28270 // AT2G42620 // AT3G61390 // AT5G49665 // AT2G22680
GO:0016741	F	transferase activity, transferring one-carbon groups	7	787	275	37767	0.35	1	// AT1G36370 // AT4G13890 // AT1G66700 // AT2G43920 // AT3G44840 // AT1G67980 // AT5G38100
GO:0005509	F	calcium ion binding	5	787	215	37767	0.47	1	// AT4G26560 // AT1G64480 // AT2G34940 // AT5G44460 // AT3G47480
GO:0030234	F	enzyme regulator activity	6	787	367	37767	0.77	1	// AT5G43570 // AT2G02120 // AT5G43580 // AT5G20860 // AT1G49620 // AT1G73260
GO:0015294	F	solute:cation symporter activity	5	787	163	37767	0.26	1	// AT1G77210 // AT1G79410 // AT5G43360 // AT3G05400 // AT5G47560
GO:0015293	F	symporter activity	5	787	164	37767	0.26	1	// AT1G77210 // AT1G79410 // AT5G43360 // AT3G05400 // AT5G47560
GO:0000166	F	nucleotide binding	45	787	2267	37767	0.65	1	// AT3G04210 // AT3G20040 // AT1G61480 // AT3G09440 // AT3G48840 // AT1G67000 // AT3G47110 // AT5G53680 // AT4G28350 // AT5G02490 // AT1G43910 // AT1G66730 // AT1G60500 // AT5G25230 // AT1G26410 // AT3G28540 // AT1G26380 // AT5G15450 // AT1G30700 // AT1G67520 // AT2G18193 // AT5G59260 // AT3G53590 // AT5G17760 // AT5G03495 // AT1G02430 // AT1G74310 // AT5G49780 // AT3G57300 // AT4G18330 // AT4G13…
[truncated: 57 more rows]
